# Supplementary material for: Comparison of Properties of Stem Cells Isolated from Adipose Tissue and Lipomas in Dogs
Source: Stem Cells Int. 2019 Nov 20;2019:1609876. doi: 10.1155/2019/1609876 (PMC6886319; doi:10.1155/2019/1609876)
Supplement: Supplementary Materials — Supplementary Material 1: proteins detected in conditioned medium of ADSCs and LDSCs by iTRAQ. Supplementary Material 2: Gene Ontology analysis of detection proteins in ADSC- and LDSC-CM. [file 1609876.f1.xlsx]

## Sheet: Supplementary Material 1
Accession #	Name
tr|F1PWW0|F1PWW0_CANLF	Filamin A OS=Canis lupus familiaris OX=9615 GN=FLNA PE=4 SV=2
tr|F1PHS5|F1PHS5_CANLF	Plectin OS=Canis lupus familiaris OX=9615 GN=PLEC PE=4 SV=2
tr|F1PHY1|F1PHY1_CANLF	Collagen alpha-2(I) chain OS=Canis lupus familiaris OX=9615 GN=COL1A2 PE=4 SV=1
tr|F1P9J3|F1P9J3_CANLF	Myosin-9 OS=Canis lupus familiaris OX=9615 GN=MYH9 PE=3 SV=2
tr|F1PLS4|F1PLS4_CANLF	Vimentin OS=Canis lupus familiaris OX=9615 GN=VIM PE=3 SV=1
tr|J9P0L0|J9P0L0_CANLF	Collagen type III alpha 1 chain OS=Canis lupus familiaris OX=9615 GN=COL3A1 PE=4 SV=1
tr|J9P4F3|J9P4F3_CANLF	Vinculin OS=Canis lupus familiaris OX=9615 GN=VCL PE=4 SV=1
tr|E2QY08|E2QY08_CANLF	Actinin alpha 1 OS=Canis lupus familiaris OX=9615 GN=ACTN1 PE=4 SV=2
tr|J9NRJ0|J9NRJ0_CANLF	Heparan sulfate proteoglycan 2 OS=Canis lupus familiaris OX=9615 GN=HSPG2 PE=4 SV=1
tr|F1PSC2|F1PSC2_CANLF	Talin 1 OS=Canis lupus familiaris OX=9615 GN=TLN1 PE=4 SV=2
tr|F6Y3P9|F6Y3P9_CANLF	Gelsolin OS=Canis lupus familiaris OX=9615 GN=GSN PE=4 SV=1
tr|F1PG08|F1PG08_CANLF	Collagen type V alpha 2 chain OS=Canis lupus familiaris OX=9615 GN=COL5A2 PE=4 SV=2
sp|Q9XSJ7|CO1A1_CANLF	Collagen alpha-1(I) chain OS=Canis lupus familiaris OX=9615 GN=COL1A1 PE=1 SV=1
tr|E2R0F2|E2R0F2_CANLF	Filamin B OS=Canis lupus familiaris OX=9615 GN=FLNB PE=4 SV=2
tr|J9P969|J9P969_CANLF	AHNAK nucleoprotein OS=Canis lupus familiaris OX=9615 GN=AHNAK PE=4 SV=1
tr|J9P2H0|J9P2H0_CANLF	Spectrin alpha, non-erythrocytic 1 OS=Canis lupus familiaris OX=9615 GN=SPTAN1 PE=4 SV=1
sp|O18840|ACTB_CANLF	Actin, cytoplasmic 1 OS=Canis lupus familiaris OX=9615 GN=ACTB PE=2 SV=3
tr|F1PBJ3|F1PBJ3_CANLF	Lamin A/C OS=Canis lupus familiaris OX=9615 GN=LMNA PE=3 SV=1
tr|E2RP26|E2RP26_CANLF	Filamin C OS=Canis lupus familiaris OX=9615 GN=FLNC PE=4 SV=1
tr|F1PGY1|F1PGY1_CANLF	Heat shock protein 90 alpha family class A member 1 OS=Canis lupus familiaris OX=9615 GN=HSP90AA1 PE=4 SV=2
tr|E2R0T6|E2R0T6_CANLF	Heat shock protein family A (Hsp70) member 8 OS=Canis lupus familiaris OX=9615 GN=HSPA8 PE=3 SV=1
tr|F6XRY2|F6XRY2_CANLF	Eukaryotic translation elongation factor 2 OS=Canis lupus familiaris OX=9615 GN=EEF2 PE=4 SV=1
tr|F1Q0J3|F1Q0J3_CANLF	Caldesmon 1 OS=Canis lupus familiaris OX=9615 GN=CALD1 PE=4 SV=2
tr|F6XWS5|F6XWS5_CANLF	Collagen type XII alpha 1 chain OS=Canis lupus familiaris OX=9615 GN=COL12A1 PE=4 SV=1
tr|E2RSI6|E2RSI6_CANLF	Ezrin OS=Canis lupus familiaris OX=9615 GN=EZR PE=4 SV=1
tr|F1PFM6|F1PFM6_CANLF	Collagen type VI alpha 1 chain OS=Canis lupus familiaris OX=9615 GN=COL6A1 PE=4 SV=2
tr|F6V234|F6V234_CANLF	Plastin 3 OS=Canis lupus familiaris OX=9615 GN=PLS3 PE=4 SV=1
tr|E2RMA3|E2RMA3_CANLF	Secreted protein acidic and cysteine rich OS=Canis lupus familiaris OX=9615 GN=SPARC PE=4 SV=1
tr|F1PHR2|F1PHR2_CANLF	Pyruvate kinase OS=Canis lupus familiaris OX=9615 GN=PKM PE=3 SV=2
tr|F1P912|F1P912_CANLF	Tropomyosin 1 OS=Canis lupus familiaris OX=9615 GN=TPM1 PE=3 SV=1
tr|F1PUI4|F1PUI4_CANLF	Serpin family E member 1 OS=Canis lupus familiaris OX=9615 GN=SERPINE1 PE=3 SV=2
tr|F1PL97|F1PL97_CANLF	Protein disulfide-isomerase OS=Canis lupus familiaris OX=9615 GN=P4HB PE=3 SV=2
tr|F1PXT8|F1PXT8_CANLF	Spectrin beta chain OS=Canis lupus familiaris OX=9615 GN=SPTBN1 PE=3 SV=2
tr|F1P8N6|F1P8N6_CANLF	Endoplasmin OS=Canis lupus familiaris OX=9615 GN=HSP90B1 PE=3 SV=1
tr|E2R5T9|E2R5T9_CANLF	Actinin alpha 4 OS=Canis lupus familiaris OX=9615 GN=ACTN4 PE=4 SV=1
tr|E2RAE8|E2RAE8_CANLF	Transgelin OS=Canis lupus familiaris OX=9615 GN=TAGLN PE=3 SV=2
tr|F1PVW0|F1PVW0_CANLF	L-lactate dehydrogenase OS=Canis lupus familiaris OX=9615 GN=LDHA PE=3 SV=2
tr|F1PIC7|F1PIC7_CANLF	Heat shock protein family A (Hsp70) member 5 OS=Canis lupus familiaris OX=9615 GN=HSPA5 PE=3 SV=2
tr|E2R7F1|E2R7F1_CANLF	Moesin OS=Canis lupus familiaris OX=9615 GN=MSN PE=4 SV=2
tr|E2RLQ9|E2RLQ9_CANLF	Valosin containing protein OS=Canis lupus familiaris OX=9615 GN=VCP PE=3 SV=2
tr|F6XQD6|F6XQD6_CANLF	Microtubule associated protein 1B OS=Canis lupus familiaris OX=9615 GN=MAP1B PE=4 SV=1
tr|E2RSR5|E2RSR5_CANLF	Eukaryotic translation initiation factor 3 subunit A OS=Canis lupus familiaris OX=9615 GN=EIF3A PE=3 SV=2
tr|E2RD86|E2RD86_CANLF	Protein disulfide-isomerase OS=Canis lupus familiaris OX=9615 GN=PDIA3 PE=3 SV=1
sp|Q28298|RRBP1_CANLF	Ribosome-binding protein 1 OS=Canis lupus familiaris OX=9615 GN=RRBP1 PE=2 SV=1
tr|F2Z4Q7|F2Z4Q7_CANLF	Serpin family F member 1 OS=Canis lupus familiaris OX=9615 GN=SERPINF1 PE=3 SV=1
tr|F1PBT3|F1PBT3_CANLF	Fructose-bisphosphate aldolase OS=Canis lupus familiaris OX=9615 GN=ALDOA PE=3 SV=2
tr|F1PCH3|F1PCH3_CANLF	Enolase 1 OS=Canis lupus familiaris OX=9615 GN=ENO1 PE=3 SV=2
tr|F1PHX8|F1PHX8_CANLF	Collagen type V alpha 1 chain OS=Canis lupus familiaris OX=9615 GN=COL5A1 PE=4 SV=2
tr|F1PJ65|F1PJ65_CANLF	IQ motif containing GTPase activating protein 1 OS=Canis lupus familiaris OX=9615 GN=IQGAP1 PE=4 SV=2
sp|P05124|KCRB_CANLF	Creatine kinase B-type OS=Canis lupus familiaris OX=9615 GN=CKB PE=1 SV=1
tr|J9P8M2|J9P8M2_CANLF	Fibronectin OS=Canis lupus familiaris OX=9615 GN=FN1 PE=4 SV=1
tr|G1K2D8|G1K2D8_CANLF	Biglycan OS=Canis lupus familiaris OX=9615 GN=BGN PE=3 SV=1
tr|F1Q3Y2|F1Q3Y2_CANLF	Dihydropyrimidinase like 3 OS=Canis lupus familiaris OX=9615 GN=DPYSL3 PE=4 SV=2
tr|F1PE28|F1PE28_CANLF	Transketolase OS=Canis lupus familiaris OX=9615 GN=TKT PE=4 SV=2
tr|F6UKT8|F6UKT8_CANLF	Pirin OS=Canis lupus familiaris OX=9615 GN=PIR PE=3 SV=1
tr|C7C419|C7C419_CANLF	Serpin peptidase inhibitor, clade H (Heat shock protein 47), member 1, (Collagen binding protein 1) OS=Canis lupus familiaris OX=9615 GN=SERPINH1 PE=1 SV=1
tr|F2Z4P4|F2Z4P4_CANLF	Elongation factor 1-alpha OS=Canis lupus familiaris OX=9615 GN=EEF1A1 PE=3 SV=1
tr|E2RSV9|E2RSV9_CANLF	Nucleobindin 1 OS=Canis lupus familiaris OX=9615 GN=NUCB1 PE=4 SV=1
tr|F1PCZ5|F1PCZ5_CANLF	Microtubule-associated protein OS=Canis lupus familiaris OX=9615 GN=MAP4 PE=4 SV=2
tr|E2R413|E2R413_CANLF	Capping actin protein, gelsolin like OS=Canis lupus familiaris OX=9615 GN=CAPG PE=4 SV=2
tr|J9P5F0|J9P5F0_CANLF	Complement factor D OS=Canis lupus familiaris OX=9615 GN=CFD PE=3 SV=1
sp|Q29393|PGS2_CANLF	Decorin OS=Canis lupus familiaris OX=9615 GN=DCN PE=2 SV=2
tr|F1P8L7|F1P8L7_CANLF	Rab GDP dissociation inhibitor OS=Canis lupus familiaris OX=9615 GN=GDI2 PE=3 SV=1
tr|F6UME0|F6UME0_CANLF	Alpha-2-macroglobulin OS=Canis lupus familiaris OX=9615 GN=A2M PE=4 SV=1
tr|E2QZA8|E2QZA8_CANLF	Peptidylprolyl isomerase OS=Canis lupus familiaris OX=9615 GN=FKBP10 PE=4 SV=1
tr|E2RN38|E2RN38_CANLF	Calumenin OS=Canis lupus familiaris OX=9615 GN=CALU PE=4 SV=1
tr|F1Q0B0|F1Q0B0_CANLF	Nucleolin OS=Canis lupus familiaris OX=9615 GN=NCL PE=4 SV=2
tr|F1PLT8|F1PLT8_CANLF	Sulfhydryl oxidase OS=Canis lupus familiaris OX=9615 GN=QSOX1 PE=4 SV=2
tr|A0A0A0MPD0|A0A0A0MPD0_CANLF	Triosephosphate isomerase OS=Canis lupus familiaris OX=9615 GN=TPI1 PE=3 SV=1
tr|F1PR93|F1PR93_CANLF	WD repeat domain 1 OS=Canis lupus familiaris OX=9615 GN=WDR1 PE=2 SV=2
tr|E2R416|E2R416_CANLF	Lumican OS=Canis lupus familiaris OX=9615 GN=LUM PE=4 SV=1
tr|E2R2C3|E2R2C3_CANLF	Glucose-6-phosphate isomerase OS=Canis lupus familiaris OX=9615 GN=GPI PE=3 SV=1
tr|J9P153|J9P153_CANLF	Latent transforming growth factor beta binding protein 2 OS=Canis lupus familiaris OX=9615 GN=LTBP2 PE=4 SV=1
tr|F1PBL1|F1PBL1_CANLF	Uncharacterized protein OS=Canis lupus familiaris OX=9615 GN=YWHAZ PE=3 SV=2
tr|F1Q332|F1Q332_CANLF	Glycyl-tRNA synthetase OS=Canis lupus familiaris OX=9615 GN=GARS PE=4 SV=2
tr|E2RLS3|E2RLS3_CANLF	Uncharacterized protein OS=Canis lupus familiaris OX=9615 GN=HSP90AB1 PE=3 SV=2
tr|E2QYP1|E2QYP1_CANLF	Uncharacterized protein OS=Canis lupus familiaris OX=9615 GN=HNRNPA1 PE=4 SV=2
tr|E2R002|E2R002_CANLF	Prostaglandin reductase 1 OS=Canis lupus familiaris OX=9615 GN=PTGR1 PE=4 SV=2
tr|F6UYJ9|F6UYJ9_CANLF	Calreticulin OS=Canis lupus familiaris OX=9615 GN=CALR PE=3 SV=1
tr|E2RT65|E2RT65_CANLF	Phosphoglycerate mutase OS=Canis lupus familiaris OX=9615 GN=PGAM1 PE=3 SV=2
tr|F1PTZ9|F1PTZ9_CANLF	Glyceraldehyde-3-phosphate dehydrogenase OS=Canis lupus familiaris OX=9615 GN=GAPDH PE=3 SV=2
tr|E2RDN1|E2RDN1_CANLF	Phosphoserine aminotransferase OS=Canis lupus familiaris OX=9615 GN=PSAT1 PE=3 SV=2
tr|E2QZ50|E2QZ50_CANLF	Adenylyl cyclase-associated protein OS=Canis lupus familiaris OX=9615 GN=CAP1 PE=3 SV=1
tr|D5IGD0|D5IGD0_CANLF	Thrombospondin 2 OS=Canis lupus familiaris OX=9615 GN=THBS2 PE=4 SV=1
tr|E2RRC9|E2RRC9_CANLF	Phosphoglycerate kinase OS=Canis lupus familiaris OX=9615 GN=PGK1 PE=3 SV=1
tr|F1PEM7|F1PEM7_CANLF	Insulin like growth factor binding protein 2 OS=Canis lupus familiaris OX=9615 GN=IGFBP2 PE=4 SV=1
tr|E2RLY5|E2RLY5_CANLF	Leucine aminopeptidase 3 OS=Canis lupus familiaris OX=9615 GN=LAP3 PE=3 SV=2
tr|E2RC20|E2RC20_CANLF	Nucleoside diphosphate kinase OS=Canis lupus familiaris OX=9615 GN=NME1 PE=3 SV=2
tr|E2RB37|E2RB37_CANLF	Uncharacterized protein OS=Canis lupus familiaris OX=9615 GN=PDIA6 PE=3 SV=1
tr|F1PXK3|F1PXK3_CANLF	Nidogen 1 OS=Canis lupus familiaris OX=9615 GN=NID1 PE=4 SV=2
tr|E2RGR7|E2RGR7_CANLF	Coiled-coil domain containing 80 OS=Canis lupus familiaris OX=9615 GN=CCDC80 PE=4 SV=2
tr|F1PF31|F1PF31_CANLF	Tenascin C OS=Canis lupus familiaris OX=9615 GN=TNC PE=4 SV=1
tr|J9P889|J9P889_CANLF	Collagen type VI alpha 2 chain OS=Canis lupus familiaris OX=9615 GN=COL6A2 PE=4 SV=1
tr|E2RKJ6|E2RKJ6_CANLF	Serpin family B member 1 OS=Canis lupus familiaris OX=9615 GN=SERPINB1 PE=3 SV=1
tr|J9PAI4|J9PAI4_CANLF	T-complex protein 1 subunit epsilon OS=Canis lupus familiaris OX=9615 GN=CCT5 PE=3 SV=1
sp|Q3YIX4|PEBP1_CANLF	Phosphatidylethanolamine-binding protein 1 OS=Canis lupus familiaris OX=9615 GN=PEBP1 PE=1 SV=1
tr|F1PBI6|F1PBI6_CANLF	Thrombospondin 1 OS=Canis lupus familiaris OX=9615 GN=THBS1 PE=4 SV=2
tr|F1PHQ0|F1PHQ0_CANLF	Clathrin heavy chain OS=Canis lupus familiaris OX=9615 GN=CLTC PE=3 SV=2
tr|E2R574|E2R574_CANLF	Uncharacterized protein OS=Canis lupus familiaris OX=9615 GN=EEF1G PE=4 SV=1
tr|F6PME1|F6PME1_CANLF	Galectin OS=Canis lupus familiaris OX=9615 GN=LGALS3 PE=4 SV=1
sp|Q6TEQ7|ANXA2_CANLF	Annexin A2 OS=Canis lupus familiaris OX=9615 GN=ANXA2 PE=1 SV=1
tr|F1PGY9|F1PGY9_CANLF	Dynein cytoplasmic 1 heavy chain 1 OS=Canis lupus familiaris OX=9615 GN=DYNC1H1 PE=4 SV=2
tr|F1PQN5|F1PQN5_CANLF	Cofilin 1 OS=Canis lupus familiaris OX=9615 GN=CFL1 PE=3 SV=2
tr|F6X637|F6X637_CANLF	Karyopherin subunit beta 1 OS=Canis lupus familiaris OX=9615 GN=KPNB1 PE=4 SV=1
tr|F6X7L0|F6X7L0_CANLF	Tropomyosin 4 OS=Canis lupus familiaris OX=9615 GN=TPM4 PE=3 SV=1
tr|L7N0B2|L7N0B2_CANLF	Tubulin alpha chain OS=Canis lupus familiaris OX=9615 GN=TUBA1B PE=3 SV=1
tr|E2RTB1|E2RTB1_CANLF	Uncharacterized protein OS=Canis lupus familiaris OX=9615 GN=NPM1 PE=4 SV=2
tr|J9P884|J9P884_CANLF	Versican OS=Canis lupus familiaris OX=9615 GN=VCAN PE=4 SV=1
tr|F1PUL4|F1PUL4_CANLF	Phosphoglucomutase 1 OS=Canis lupus familiaris OX=9615 GN=PGM1 PE=3 SV=2
tr|F1PBZ4|F1PBZ4_CANLF	NAD(P)H quinone dehydrogenase 1 OS=Canis lupus familiaris OX=9615 GN=NQO1 PE=4 SV=1
tr|E2RF06|E2RF06_CANLF	Importin 5 OS=Canis lupus familiaris OX=9615 GN=IPO5 PE=4 SV=2
tr|J9P6X3|J9P6X3_CANLF	Chondroitin sulfate proteoglycan 4 OS=Canis lupus familiaris OX=9615 GN=CSPG4 PE=4 SV=1
tr|E2QW13|E2QW13_CANLF	Inhibin subunit beta A OS=Canis lupus familiaris OX=9615 GN=INHBA PE=3 SV=1
tr|F1Q331|F1Q331_CANLF	T-complex protein 1 subunit delta OS=Canis lupus familiaris OX=9615 GN=CCT4 PE=3 SV=2
tr|E2RHR7|E2RHR7_CANLF	Tyrosine--tRNA ligase OS=Canis lupus familiaris OX=9615 GN=YARS PE=3 SV=2
tr|E2RMN6|E2RMN6_CANLF	SERPINE1 mRNA binding protein 1 OS=Canis lupus familiaris OX=9615 GN=SERBP1 PE=4 SV=2
tr|J9NV93|J9NV93_CANLF	Peptidyl-prolyl cis-trans isomerase OS=Canis lupus familiaris OX=9615 PE=3 SV=1
tr|E2QSF4|E2QSF4_CANLF	Tubulin beta chain OS=Canis lupus familiaris OX=9615 GN=TUBB PE=3 SV=1
tr|F1PVV7|F1PVV7_CANLF	Myosin heavy chain 10 OS=Canis lupus familiaris OX=9615 GN=MYH10 PE=3 SV=2
tr|F1PJ74|F1PJ74_CANLF	Apolipoprotein E OS=Canis lupus familiaris OX=9615 GN=APOE PE=3 SV=1
tr|E2RNL2|E2RNL2_CANLF	Insulin like growth factor binding protein 7 OS=Canis lupus familiaris OX=9615 GN=IGFBP7 PE=4 SV=1
tr|E2RB79|E2RB79_CANLF	T-complex protein 1 subunit gamma OS=Canis lupus familiaris OX=9615 GN=CCT3 PE=3 SV=2
tr|E2RT63|E2RT63_CANLF	Heat shock 70 kDa protein 4 OS=Canis lupus familiaris OX=9615 GN=HSPA4 PE=3 SV=2
tr|E2R0I9|E2R0I9_CANLF	Glucose-6-phosphate 1-dehydrogenase OS=Canis lupus familiaris OX=9615 GN=G6PD PE=3 SV=2
tr|E2RG27|E2RG27_CANLF	Kinectin 1 OS=Canis lupus familiaris OX=9615 GN=KTN1 PE=4 SV=2
tr|F1PD39|F1PD39_CANLF	Collagen type XI alpha 1 chain OS=Canis lupus familiaris OX=9615 GN=COL11A1 PE=4 SV=2
tr|F1Q4J0|F1Q4J0_CANLF	Glucosidase II alpha subunit OS=Canis lupus familiaris OX=9615 GN=GANAB PE=3 SV=2
tr|E2RF46|E2RF46_CANLF	Asparagine synthetase (glutamine-hydrolyzing) OS=Canis lupus familiaris OX=9615 GN=ASNS PE=4 SV=2
tr|F6V0D8|F6V0D8_CANLF	Chaperonin containing TCP1 subunit 2 OS=Canis lupus familiaris OX=9615 GN=CCT2 PE=3 SV=1
tr|F1PC59|F1PC59_CANLF	Peroxiredoxin 6 OS=Canis lupus familiaris OX=9615 GN=PRDX6 PE=4 SV=1
tr|F1PEK5|F1PEK5_CANLF	Septin 2 OS=Canis lupus familiaris OX=9615 GN=SEPT2 PE=3 SV=2
tr|F1P6P2|F1P6P2_CANLF	Transgelin OS=Canis lupus familiaris OX=9615 GN=TAGLN2 PE=3 SV=2
tr|E2RGI4|E2RGI4_CANLF	Chloride intracellular channel protein OS=Canis lupus familiaris OX=9615 GN=CLIC4 PE=3 SV=1
tr|E2RH09|E2RH09_CANLF	Sjogren syndrome antigen B OS=Canis lupus familiaris OX=9615 GN=SSB PE=4 SV=2
tr|F1PL93|F1PL93_CANLF	Rho GDP dissociation inhibitor alpha OS=Canis lupus familiaris OX=9615 GN=ARHGDIA PE=4 SV=2
tr|E2QUU5|E2QUU5_CANLF	60 kDa heat shock protein, mitochondrial OS=Canis lupus familiaris OX=9615 GN=HSPD1 PE=3 SV=2
tr|A4GT58|A4GT58_CANLF	Cdc42 GTPase-activating protein OS=Canis lupus familiaris OX=9615 GN=ARHGAP1 PE=2 SV=1
tr|J9NYN2|J9NYN2_CANLF	Cysteine and glycine rich protein 1 OS=Canis lupus familiaris OX=9615 GN=CSRP1 PE=4 SV=1
tr|F1P9U4|F1P9U4_CANLF	Dihydropyrimidinase like 2 OS=Canis lupus familiaris OX=9615 GN=DPYSL2 PE=4 SV=2
tr|F6XIK8|F6XIK8_CANLF	Synaptotagmin binding cytoplasmic RNA interacting protein OS=Canis lupus familiaris OX=9615 GN=SYNCRIP PE=4 SV=1
tr|E2RGG9|E2RGG9_CANLF	Tryptophanyl-tRNA synthetase OS=Canis lupus familiaris OX=9615 GN=WARS PE=3 SV=1
tr|J9NWI6|J9NWI6_CANLF	Dynactin subunit 1 OS=Canis lupus familiaris OX=9615 GN=DCTN1 PE=4 SV=1
tr|J9P923|J9P923_CANLF	Caveolae associated protein 1 OS=Canis lupus familiaris OX=9615 GN=CAVIN1 PE=4 SV=1
tr|E2R9E3|E2R9E3_CANLF	Damage specific DNA binding protein 1 OS=Canis lupus familiaris OX=9615 GN=DDB1 PE=4 SV=1
tr|E2RNR0|E2RNR0_CANLF	Osteoglycin OS=Canis lupus familiaris OX=9615 GN=OGN PE=4 SV=2
tr|F1PMS4|F1PMS4_CANLF	Calpain 2 OS=Canis lupus familiaris OX=9615 GN=CAPN2 PE=3 SV=2
tr|F1PUX4|F1PUX4_CANLF	60S acidic ribosomal protein P0 OS=Canis lupus familiaris OX=9615 GN=RPLP0 PE=3 SV=1
tr|F1P7M0|F1P7M0_CANLF	Aminopeptidase OS=Canis lupus familiaris OX=9615 GN=NPEPPS PE=3 SV=2
tr|E2RCI8|E2RCI8_CANLF	Annexin OS=Canis lupus familiaris OX=9615 GN=ANXA6 PE=3 SV=2
tr|E2R1A0|E2R1A0_CANLF	Uncharacterized protein OS=Canis lupus familiaris OX=9615 GN=YBX1 PE=4 SV=2
tr|E2RBA8|E2RBA8_CANLF	PDZ and LIM domain 5 OS=Canis lupus familiaris OX=9615 GN=PDLIM5 PE=4 SV=1
tr|H9GW87|H9GW87_CANLF	Transaldolase OS=Canis lupus familiaris OX=9615 GN=LOC475937 PE=3 SV=1
tr|E2QUG4|E2QUG4_CANLF	Periostin OS=Canis lupus familiaris OX=9615 GN=POSTN PE=4 SV=2
sp|Q6YKA4|HMGB1_CANLF	High mobility group protein B1 OS=Canis lupus familiaris OX=9615 GN=HMGB1 PE=2 SV=3
tr|F1P679|F1P679_CANLF	ARP3 actin related protein 3 homolog OS=Canis lupus familiaris OX=9615 GN=ACTR3 PE=3 SV=1
tr|E2RQ81|E2RQ81_CANLF	Chaperonin containing TCP1 subunit 8 OS=Canis lupus familiaris OX=9615 GN=CCT8 PE=3 SV=1
tr|E2R2V4|E2R2V4_CANLF	Thimet oligopeptidase 1 OS=Canis lupus familiaris OX=9615 GN=THOP1 PE=3 SV=1
tr|Q6RH28|Q6RH28_CANLF	Beta amyloid protein isoform APP751 OS=Canis lupus familiaris OX=9615 GN=beta APP PE=2 SV=1
tr|F1PRT4|F1PRT4_CANLF	Coatomer subunit delta OS=Canis lupus familiaris OX=9615 GN=ARCN1 PE=3 SV=2
tr|J9P1J5|J9P1J5_CANLF	Destrin, actin depolymerizing factor OS=Canis lupus familiaris OX=9615 GN=DSTN PE=3 SV=1
tr|E2RPG9|E2RPG9_CANLF	Coatomer subunit gamma OS=Canis lupus familiaris OX=9615 GN=COPG1 PE=3 SV=2
tr|F1P634|F1P634_CANLF	Myosin light chain 9 OS=Canis lupus familiaris OX=9615 GN=MYL9 PE=4 SV=2
sp|P42929|HSPB1_CANLF	Heat shock protein beta-1 OS=Canis lupus familiaris OX=9615 GN=HSPB1 PE=2 SV=1
tr|E2RRC6|E2RRC6_CANLF	Radixin OS=Canis lupus familiaris OX=9615 GN=RDX PE=4 SV=2
tr|F1P624|F1P624_CANLF	Cullin associated and neddylation dissociated 1 OS=Canis lupus familiaris OX=9615 GN=CAND1 PE=4 SV=1
tr|E2QV08|E2QV08_CANLF	Malate dehydrogenase OS=Canis lupus familiaris OX=9615 GN=MDH1 PE=3 SV=2
tr|G1K268|G1K268_CANLF	Uncharacterized protein OS=Canis lupus familiaris OX=9615 PE=3 SV=1
sp|Q863H1|SFRP2_CANLF	Secreted frizzled-related protein 2 OS=Canis lupus familiaris OX=9615 GN=SFRP2 PE=2 SV=1
tr|F1PB08|F1PB08_CANLF	Septin 9 OS=Canis lupus familiaris OX=9615 GN=SEPT9 PE=3 SV=2
tr|J9P9G4|J9P9G4_CANLF	Proteasome subunit alpha type OS=Canis lupus familiaris OX=9615 PE=3 SV=1
tr|F1PU34|F1PU34_CANLF	Cysteinyl-tRNA synthetase OS=Canis lupus familiaris OX=9615 GN=CARS PE=3 SV=2
tr|E2RCP9|E2RCP9_CANLF	26S proteasome non-ATPase regulatory subunit 2 OS=Canis lupus familiaris OX=9615 GN=PSMD2 PE=3 SV=1
tr|E2R9R1|E2R9R1_CANLF	Ras suppressor protein 1 OS=Canis lupus familiaris OX=9615 GN=RSU1 PE=4 SV=1
tr|E2QXY7|E2QXY7_CANLF	ARP2 actin related protein 2 homolog OS=Canis lupus familiaris OX=9615 GN=ACTR2 PE=3 SV=2
tr|F1Q4D9|F1Q4D9_CANLF	Retinol-binding protein OS=Canis lupus familiaris OX=9615 GN=RBP4 PE=3 SV=1
tr|E2RHG2|E2RHG2_CANLF	Uncharacterized protein OS=Canis lupus familiaris OX=9615 GN=PRDX1 PE=4 SV=1
tr|E2REK6|E2REK6_CANLF	Calmodulin 1 OS=Canis lupus familiaris OX=9615 GN=CALM1 PE=4 SV=1
tr|F1Q140|F1Q140_CANLF	Podocan OS=Canis lupus familiaris OX=9615 GN=PODN PE=4 SV=2
tr|E2R9V0|E2R9V0_CANLF	Ribosomal protein OS=Canis lupus familiaris OX=9615 GN=RPL10A PE=3 SV=2
tr|E2RKS4|E2RKS4_CANLF	Eukaryotic translation initiation factor 4B OS=Canis lupus familiaris OX=9615 GN=EIF4B PE=4 SV=1
tr|E2R5R9|E2R5R9_CANLF	UTP--glucose-1-phosphate uridylyltransferase OS=Canis lupus familiaris OX=9615 GN=UGP2 PE=3 SV=2
tr|F1PNF3|F1PNF3_CANLF	Eukaryotic translation initiation factor 4 gamma 1 OS=Canis lupus familiaris OX=9615 GN=EIF4G1 PE=4 SV=2
tr|E2R761|E2R761_CANLF	L-lactate dehydrogenase OS=Canis lupus familiaris OX=9615 GN=LDHB PE=3 SV=1
tr|F1Q1K6|F1Q1K6_CANLF	Heterogeneous nuclear ribonucleoprotein A2/B1 OS=Canis lupus familiaris OX=9615 GN=HNRNPA2B1 PE=4 SV=2
tr|E2RB32|E2RB32_CANLF	Calponin OS=Canis lupus familiaris OX=9615 GN=CNN1 PE=3 SV=1
tr|F1PX75|F1PX75_CANLF	Protein phosphatase 2 scaffold subunit Aalpha OS=Canis lupus familiaris OX=9615 GN=PPP2R1A PE=4 SV=2
tr|F1PY69|F1PY69_CANLF	Follistatin like 1 OS=Canis lupus familiaris OX=9615 GN=FSTL1 PE=4 SV=2
tr|F1P7V6|F1P7V6_CANLF	Stress induced phosphoprotein 1 OS=Canis lupus familiaris OX=9615 GN=STIP1 PE=4 SV=2
tr|E2RE39|E2RE39_CANLF	Adenylate kinase 2, mitochondrial OS=Canis lupus familiaris OX=9615 GN=AK2 PE=3 SV=2
tr|F1P7B0|F1P7B0_CANLF	Ribosomal protein L5 OS=Canis lupus familiaris OX=9615 GN=RPL5 PE=3 SV=2
tr|E2RLL6|E2RLL6_CANLF	Chaperonin containing TCP1 subunit 6A OS=Canis lupus familiaris OX=9615 GN=CCT6A PE=3 SV=2
tr|F1PM26|F1PM26_CANLF	CD109 molecule OS=Canis lupus familiaris OX=9615 GN=CD109 PE=4 SV=2
tr|F1PE09|F1PE09_CANLF	6-phosphogluconate dehydrogenase, decarboxylating OS=Canis lupus familiaris OX=9615 GN=PGD PE=3 SV=2
tr|F1PBX0|F1PBX0_CANLF	Thioredoxin reductase 1 OS=Canis lupus familiaris OX=9615 GN=TXNRD1 PE=3 SV=2
tr|H9GWE2|H9GWE2_CANLF	Uncharacterized protein OS=Canis lupus familiaris OX=9615 PE=4 SV=2
tr|F1P9H9|F1P9H9_CANLF	Nuclear casein kinase and cyclin dependent kinase substrate 1 OS=Canis lupus familiaris OX=9615 GN=NUCKS1 PE=4 SV=2
tr|F1PGL8|F1PGL8_CANLF	A-kinase anchoring protein 12 OS=Canis lupus familiaris OX=9615 GN=AKAP12 PE=4 SV=2
tr|J9P048|J9P048_CANLF	Uncharacterized protein OS=Canis lupus familiaris OX=9615 PE=3 SV=1
tr|E2R0L9|E2R0L9_CANLF	T-complex 1 OS=Canis lupus familiaris OX=9615 GN=TCP1 PE=3 SV=1
tr|F1PGB6|F1PGB6_CANLF	Interleukin enhancer binding factor 3 OS=Canis lupus familiaris OX=9615 GN=ILF3 PE=4 SV=2
tr|J9NS29|J9NS29_CANLF	Cystatin OS=Canis lupus familiaris OX=9615 GN=CST3 PE=3 SV=1
tr|E2QYU2|E2QYU2_CANLF	Clusterin OS=Canis lupus familiaris OX=9615 GN=CLU PE=3 SV=1
tr|F1PR66|F1PR66_CANLF	Laminin subunit alpha 4 OS=Canis lupus familiaris OX=9615 GN=LAMA4 PE=4 SV=2
tr|E2R2N2|E2R2N2_CANLF	Mitogen-activated protein kinase OS=Canis lupus familiaris OX=9615 GN=MAPK1 PE=3 SV=1
tr|F6Y290|F6Y290_CANLF	Leukotriene A(4) hydrolase OS=Canis lupus familiaris OX=9615 GN=LTA4H PE=3 SV=1
tr|E2R9U8|E2R9U8_CANLF	Eukaryotic translation elongation factor 1 delta OS=Canis lupus familiaris OX=9615 GN=EEF1D PE=3 SV=2
tr|E2RB31|E2RB31_CANLF	Hypoxia up-regulated 1 OS=Canis lupus familiaris OX=9615 GN=HYOU1 PE=3 SV=2
tr|F1P9P5|F1P9P5_CANLF	Ubiquitinyl hydrolase 1 OS=Canis lupus familiaris OX=9615 GN=USP5 PE=3 SV=2
tr|J9NZV9|J9NZV9_CANLF	Uncharacterized protein OS=Canis lupus familiaris OX=9615 PE=4 SV=1
tr|F1PUN9|F1PUN9_CANLF	Acidic nuclear phosphoprotein 32 family member B OS=Canis lupus familiaris OX=9615 GN=ANP32B PE=4 SV=2
sp|B6V8E6|CTNB1_CANLF	Catenin beta-1 OS=Canis lupus familiaris OX=9615 GN=CTNNB1 PE=1 SV=1
tr|E2RA50|E2RA50_CANLF	Heterogeneous nuclear ribonucleoprotein K OS=Canis lupus familiaris OX=9615 GN=HNRNPK PE=4 SV=2
tr|E2QZ69|E2QZ69_CANLF	Histidyl-tRNA synthetase OS=Canis lupus familiaris OX=9615 GN=HARS PE=3 SV=1
tr|E2R9A2|E2R9A2_CANLF	Coatomer subunit beta OS=Canis lupus familiaris OX=9615 GN=COPB1 PE=4 SV=2
tr|E2RAT6|E2RAT6_CANLF	Coatomer subunit epsilon OS=Canis lupus familiaris OX=9615 GN=COPE PE=3 SV=1
tr|F1Q1Q0|F1Q1Q0_CANLF	Coronin OS=Canis lupus familiaris OX=9615 GN=CORO1C PE=3 SV=2
tr|F1PQM1|F1PQM1_CANLF	Purine nucleoside phosphorylase OS=Canis lupus familiaris OX=9615 GN=PNP PE=3 SV=2
tr|E2RSP4|E2RSP4_CANLF	Lysine--tRNA ligase OS=Canis lupus familiaris OX=9615 GN=KARS PE=3 SV=1
tr|E2RAS8|E2RAS8_CANLF	Enolase 2 OS=Canis lupus familiaris OX=9615 GN=ENO2 PE=3 SV=2
tr|E2RMC1|E2RMC1_CANLF	ST13, Hsp70 interacting protein OS=Canis lupus familiaris OX=9615 GN=ST13 PE=4 SV=2
tr|E2RSC5|E2RSC5_CANLF	Talin 2 OS=Canis lupus familiaris OX=9615 GN=TLN2 PE=4 SV=2
tr|E2RN45|E2RN45_CANLF	G3BP stress granule assembly factor 1 OS=Canis lupus familiaris OX=9615 GN=G3BP1 PE=4 SV=2
tr|F1P797|F1P797_CANLF	5-aminoimidazole-4-carboxamide ribonucleotide formyltransferase/IMP cyclohydrolase OS=Canis lupus familiaris OX=9615 GN=ATIC PE=3 SV=2
tr|E2QUR2|E2QUR2_CANLF	Glutamyl-prolyl-tRNA synthetase OS=Canis lupus familiaris OX=9615 GN=EPRS PE=3 SV=1
tr|H9GW59|H9GW59_CANLF	AE binding protein 1 OS=Canis lupus familiaris OX=9615 GN=AEBP1 PE=4 SV=2
tr|F6XVD7|F6XVD7_CANLF	Ubiquitin carboxyl-terminal hydrolase OS=Canis lupus familiaris OX=9615 GN=UCHL1 PE=3 SV=1
tr|F1PCD8|F1PCD8_CANLF	Laminin subunit beta 1 OS=Canis lupus familiaris OX=9615 GN=LAMB1 PE=4 SV=2
tr|F2Z4Q6|F2Z4Q6_CANLF	Serum albumin OS=Canis lupus familiaris OX=9615 GN=ALB PE=4 SV=1
tr|F1PCG4|F1PCG4_CANLF	Peroxiredoxin 2 OS=Canis lupus familiaris OX=9615 GN=PRDX2 PE=4 SV=2
tr|F6V5M4|F6V5M4_CANLF	Nuclear distribution C, dynein complex regulator OS=Canis lupus familiaris OX=9615 GN=NUDC PE=4 SV=1
tr|E2QXA6|E2QXA6_CANLF	Calpastatin OS=Canis lupus familiaris OX=9615 GN=CAST PE=4 SV=2
tr|F1PLV2|F1PLV2_CANLF	Peptidyl-prolyl cis-trans isomerase OS=Canis lupus familiaris OX=9615 GN=PPIB PE=3 SV=2
tr|F1Q129|F1Q129_CANLF	Collagen type IV alpha 2 chain OS=Canis lupus familiaris OX=9615 GN=COL4A2 PE=4 SV=2
tr|F1P7C2|F1P7C2_CANLF	Alanyl-tRNA synthetase OS=Canis lupus familiaris OX=9615 GN=AARS PE=3 SV=2
tr|F1P6B7|F1P6B7_CANLF	Annexin OS=Canis lupus familiaris OX=9615 GN=ANXA1 PE=3 SV=1
tr|J9P3G1|J9P3G1_CANLF	Lamin B1 OS=Canis lupus familiaris OX=9615 GN=LMNB1 PE=3 SV=1
tr|E2QS13|E2QS13_CANLF	Parkinsonism associated deglycase OS=Canis lupus familiaris OX=9615 GN=PARK7 PE=4 SV=1
tr|E2RQP6|E2RQP6_CANLF	Eukaryotic translation initiation factor 3 subunit C OS=Canis lupus familiaris OX=9615 GN=EIF3C PE=3 SV=1
tr|J9P2L4|J9P2L4_CANLF	HtrA serine peptidase 1 OS=Canis lupus familiaris OX=9615 GN=HTRA1 PE=4 SV=1
tr|E2QZ05|E2QZ05_CANLF	Dynactin subunit 2 OS=Canis lupus familiaris OX=9615 GN=DCTN2 PE=4 SV=1
tr|E2QW34|E2QW34_CANLF	Proteasome subunit beta OS=Canis lupus familiaris OX=9615 GN=PSMB2 PE=3 SV=1
tr|E2R0P3|E2R0P3_CANLF	Isochorismatase domain containing 1 OS=Canis lupus familiaris OX=9615 GN=ISOC1 PE=4 SV=1
tr|E2RKQ6|E2RKQ6_CANLF	Galectin 3 binding protein OS=Canis lupus familiaris OX=9615 GN=LGALS3BP PE=4 SV=1
tr|J9P6N4|J9P6N4_CANLF	Tyrosine 3-monooxygenase/tryptophan 5-monooxygenase activation protein eta OS=Canis lupus familiaris OX=9615 GN=YWHAH PE=3 SV=1
sp|Q8WNN6|SODC_CANLF	Superoxide dismutase [Cu-Zn] OS=Canis lupus familiaris OX=9615 GN=SOD1 PE=2 SV=1
tr|F1PRU3|F1PRU3_CANLF	Fibulin 2 OS=Canis lupus familiaris OX=9615 GN=FBLN2 PE=4 SV=2
tr|J9P5T5|J9P5T5_CANLF	Polypyrimidine tract binding protein 1 OS=Canis lupus familiaris OX=9615 GN=PTBP1 PE=4 SV=1
tr|F1PGI9|F1PGI9_CANLF	Heparin binding growth factor OS=Canis lupus familiaris OX=9615 GN=HDGF PE=4 SV=2
tr|J9P5U3|J9P5U3_CANLF	Galectin OS=Canis lupus familiaris OX=9615 GN=LGALS1 PE=4 SV=1
tr|E2R4A5|E2R4A5_CANLF	RAD23 homolog B, nucleotide excision repair protein OS=Canis lupus familiaris OX=9615 GN=RAD23B PE=4 SV=2
tr|J9P1H1|J9P1H1_CANLF	Utrophin OS=Canis lupus familiaris OX=9615 GN=UTRN PE=4 SV=1
tr|J9P326|J9P326_CANLF	Polyadenylate-binding protein OS=Canis lupus familiaris OX=9615 GN=PABPC1 PE=3 SV=1
tr|F1PDT7|F1PDT7_CANLF	Adaptor related protein complex 2 subunit alpha 2 OS=Canis lupus familiaris OX=9615 GN=AP2A2 PE=4 SV=2
tr|F6VA50|F6VA50_CANLF	Nestin OS=Canis lupus familiaris OX=9615 GN=NES PE=3 SV=1
tr|J9P7D5|J9P7D5_CANLF	Glutathione S-transferase mu 4 OS=Canis lupus familiaris OX=9615 GN=GSTM4 PE=3 SV=1
tr|E2RM11|E2RM11_CANLF	Nucleobindin 2 OS=Canis lupus familiaris OX=9615 GN=NUCB2 PE=4 SV=2
tr|J9NZX7|J9NZX7_CANLF	Malic enzyme OS=Canis lupus familiaris OX=9615 GN=ME1 PE=3 SV=1
tr|F2Z4N0|F2Z4N0_CANLF	Actin, alpha 2, smooth muscle, aorta OS=Canis lupus familiaris OX=9615 GN=ACTA2 PE=3 SV=1
tr|E2RMN2|E2RMN2_CANLF	Proteasome subunit alpha type OS=Canis lupus familiaris OX=9615 GN=PSMA6 PE=3 SV=1
tr|F1PSM2|F1PSM2_CANLF	Alpha-1,4 glucan phosphorylase OS=Canis lupus familiaris OX=9615 GN=PYGB PE=3 SV=2
tr|F1PQS3|F1PQS3_CANLF	Capping actin protein of muscle Z-line subunit beta OS=Canis lupus familiaris OX=9615 GN=CAPZB PE=4 SV=2
tr|E2RLA5|E2RLA5_CANLF	Golgi membrane protein 1 OS=Canis lupus familiaris OX=9615 GN=GOLM1 PE=4 SV=2
tr|F1Q0J0|F1Q0J0_CANLF	Uncharacterized protein OS=Canis lupus familiaris OX=9615 GN=GSTP1 PE=4 SV=2
tr|E2RB38|E2RB38_CANLF	Tropomyosin 3 OS=Canis lupus familiaris OX=9615 GN=TPM3 PE=3 SV=2
tr|F1PA19|F1PA19_CANLF	Heterogeneous nuclear ribonucleoprotein A/B OS=Canis lupus familiaris OX=9615 GN=HNRNPAB PE=4 SV=2
tr|E2R9S7|E2R9S7_CANLF	Catenin alpha 1 OS=Canis lupus familiaris OX=9615 GN=CTNNA1 PE=4 SV=1
sp|Q5WR10|DX39B_CANLF	Spliceosome RNA helicase DDX39B OS=Canis lupus familiaris OX=9615 GN=DDX39B PE=3 SV=1
tr|F1PUB5|F1PUB5_CANLF	Proteasome endopeptidase complex OS=Canis lupus familiaris OX=9615 GN=PSMA7 PE=3 SV=2
tr|F1Q3J6|F1Q3J6_CANLF	Tyrosine-protein phosphatase non-receptor type OS=Canis lupus familiaris OX=9615 GN=PTPN11 PE=3 SV=2
tr|F6XQ49|F6XQ49_CANLF	Prefoldin subunit 3 OS=Canis lupus familiaris OX=9615 GN=VBP1 PE=3 SV=1
tr|E2R311|E2R311_CANLF	UDP-glucose 6-dehydrogenase OS=Canis lupus familiaris OX=9615 GN=UGDH PE=3 SV=1
tr|E2RNW5|E2RNW5_CANLF	Endoplasmic reticulum oxidoreductase 1 alpha OS=Canis lupus familiaris OX=9615 GN=ERO1A PE=4 SV=1
tr|F1PTI7|F1PTI7_CANLF	Erythrocyte membrane protein band 4.1 like 2 OS=Canis lupus familiaris OX=9615 GN=EPB41L2 PE=4 SV=2
tr|F1PAG6|F1PAG6_CANLF	Arp2/3 complex 34 kDa subunit OS=Canis lupus familiaris OX=9615 GN=ARPC2 PE=3 SV=2
tr|J9P315|J9P315_CANLF	LDL receptor related protein 1 OS=Canis lupus familiaris OX=9615 GN=LRP1 PE=4 SV=1
tr|F1PYU3|F1PYU3_CANLF	Fascin OS=Canis lupus familiaris OX=9615 GN=FSCN1 PE=3 SV=2
tr|F1Q264|F1Q264_CANLF	Eukaryotic translation initiation factor 5A OS=Canis lupus familiaris OX=9615 GN=EIF5A PE=3 SV=2
tr|E2QWJ6|E2QWJ6_CANLF	Protein phosphatase 1 regulatory subunit 12A OS=Canis lupus familiaris OX=9615 GN=PPP1R12A PE=4 SV=2
tr|E2RCV4|E2RCV4_CANLF	Lysyl oxidase like 2 OS=Canis lupus familiaris OX=9615 GN=LOXL2 PE=4 SV=2
tr|E2QRR5|E2QRR5_CANLF	Arginyl-tRNA synthetase OS=Canis lupus familiaris OX=9615 GN=RARS PE=3 SV=1
tr|F1P6U6|F1P6U6_CANLF	Cadherin 11 OS=Canis lupus familiaris OX=9615 GN=CDH11 PE=4 SV=2
tr|J9NZK5|J9NZK5_CANLF	Lysyl oxidase OS=Canis lupus familiaris OX=9615 GN=LOX PE=4 SV=1
tr|J9NU79|J9NU79_CANLF	Uncharacterized protein OS=Canis lupus familiaris OX=9615 PE=4 SV=1
tr|E2RLB8|E2RLB8_CANLF	Prolyl 4-hydroxylase subunit alpha 1 OS=Canis lupus familiaris OX=9615 GN=P4HA1 PE=4 SV=2
tr|F1PFB4|F1PFB4_CANLF	Fermitin family member 2 OS=Canis lupus familiaris OX=9615 GN=FERMT2 PE=4 SV=2
tr|F1PU93|F1PU93_CANLF	Coatomer subunit alpha OS=Canis lupus familiaris OX=9615 GN=COPA PE=4 SV=2
tr|F1PPL9|F1PPL9_CANLF	Uncharacterized protein OS=Canis lupus familiaris OX=9615 GN=C1QTNF3 PE=4 SV=2
tr|F1Q067|F1Q067_CANLF	Septin 7 OS=Canis lupus familiaris OX=9615 GN=SEPT7 PE=3 SV=2
tr|F1PEZ5|F1PEZ5_CANLF	Laminin subunit alpha 2 OS=Canis lupus familiaris OX=9615 GN=LAMA2 PE=4 SV=2
tr|E2RJE0|E2RJE0_CANLF	Cartilage oligomeric matrix protein OS=Canis lupus familiaris OX=9615 GN=COMP PE=4 SV=2
tr|J9NWJ5|J9NWJ5_CANLF	Thioredoxin OS=Canis lupus familiaris OX=9615 PE=3 SV=1
tr|F1PDR0|F1PDR0_CANLF	CD166 antigen OS=Canis lupus familiaris OX=9615 GN=ALCAM PE=4 SV=2
tr|E2QZ11|E2QZ11_CANLF	Matrix remodeling associated 8 OS=Canis lupus familiaris OX=9615 GN=MXRA8 PE=4 SV=1
tr|J9NS87|J9NS87_CANLF	T-complex protein 1 subunit eta OS=Canis lupus familiaris OX=9615 GN=LOC100856782 PE=3 SV=1
tr|F1P9B2|F1P9B2_CANLF	Switching B cell complex subunit SWAP70 OS=Canis lupus familiaris OX=9615 GN=SWAP70 PE=4 SV=2
tr|F1PFF2|F1PFF2_CANLF	Protein S100 OS=Canis lupus familiaris OX=9615 GN=S100A11 PE=3 SV=2
tr|E2RBR6|E2RBR6_CANLF	Proteasome subunit beta OS=Canis lupus familiaris OX=9615 GN=PSMB4 PE=3 SV=1
tr|F1PYG8|F1PYG8_CANLF	Malate dehydrogenase OS=Canis lupus familiaris OX=9615 GN=MDH2 PE=3 SV=1
tr|A0A0B4J194|A0A0B4J194_CANLF	Aspartate aminotransferase OS=Canis lupus familiaris OX=9615 GN=GOT2 PE=4 SV=1
tr|J9NTR8|J9NTR8_CANLF	Eukaryotic translation initiation factor 3 subunit H OS=Canis lupus familiaris OX=9615 GN=EIF3H PE=3 SV=1
tr|F1PEC4|F1PEC4_CANLF	Cadherin 2 OS=Canis lupus familiaris OX=9615 GN=CDH2 PE=4 SV=2
tr|E2RFC7|E2RFC7_CANLF	Uncharacterized protein OS=Canis lupus familiaris OX=9615 GN=RTRAF PE=4 SV=1
tr|F1PZL5|F1PZL5_CANLF	Procollagen-lysine,2-oxoglutarate 5-dioxygenase 2 OS=Canis lupus familiaris OX=9615 GN=PLOD2 PE=4 SV=2
tr|J9NT20|J9NT20_CANLF	Obg-like ATPase 1 OS=Canis lupus familiaris OX=9615 GN=OLA1 PE=3 SV=1
tr|E2R4D5|E2R4D5_CANLF	Seryl-tRNA synthetase OS=Canis lupus familiaris OX=9615 GN=SARS PE=4 SV=1
tr|E2RM67|E2RM67_CANLF	RB binding protein 7, chromatin remodeling factor OS=Canis lupus familiaris OX=9615 GN=RBBP7 PE=4 SV=1
tr|J9NUZ4|J9NUZ4_CANLF	Reticulocalbin 3 OS=Canis lupus familiaris OX=9615 GN=RCN3 PE=4 SV=1
tr|W0RY37|W0RY37_CANLF	Dickkopf 3 homolog OS=Canis lupus familiaris OX=9615 GN=Dkk-3 PE=2 SV=1
tr|J9NT23|J9NT23_CANLF	Calpain small subunit 1 OS=Canis lupus familiaris OX=9615 GN=CAPNS1 PE=4 SV=1
tr|F1PNP7|F1PNP7_CANLF	EH domain containing 2 OS=Canis lupus familiaris OX=9615 GN=EHD2 PE=3 SV=2
tr|F1PMK7|F1PMK7_CANLF	Matrix metallopeptidase 2 OS=Canis lupus familiaris OX=9615 GN=MMP2 PE=3 SV=2
tr|E2R3J1|E2R3J1_CANLF	Eukaryotic translation initiation factor 4A2 OS=Canis lupus familiaris OX=9615 GN=EIF4A2 PE=3 SV=1
tr|F1P7J0|F1P7J0_CANLF	Uncharacterized protein OS=Canis lupus familiaris OX=9615 PE=4 SV=2
tr|J9JHJ2|J9JHJ2_CANLF	40S ribosomal protein SA OS=Canis lupus familiaris OX=9615 GN=RPSA PE=3 SV=1
tr|F1PBC8|F1PBC8_CANLF	Copper transport protein ATOX1 OS=Canis lupus familiaris OX=9615 GN=ATOX1 PE=4 SV=2
tr|E2QRX1|E2QRX1_CANLF	Vacuolar protein sorting-associated protein 35 OS=Canis lupus familiaris OX=9615 GN=VPS35 PE=3 SV=1
tr|E2RIX2|E2RIX2_CANLF	Heterogeneous nuclear ribonucleoprotein D OS=Canis lupus familiaris OX=9615 GN=HNRNPD PE=4 SV=2
tr|F6Y5Z5|F6Y5Z5_CANLF	Uncharacterized protein OS=Canis lupus familiaris OX=9615 GN=MAPRE1 PE=4 SV=1
tr|F1PIJ6|F1PIJ6_CANLF	Pyrophosphatase (inorganic) 1 OS=Canis lupus familiaris OX=9615 GN=PPA1 PE=4 SV=2
tr|F1PQS2|F1PQS2_CANLF	Metalloproteinase inhibitor 1 OS=Canis lupus familiaris OX=9615 GN=TIMP1 PE=4 SV=2
sp|P63050|RL40_CANLF	Ubiquitin-60S ribosomal protein L40 OS=Canis lupus familiaris OX=9615 GN=UBA52 PE=2 SV=2
tr|F6X4J2|F6X4J2_CANLF	Importin 7 OS=Canis lupus familiaris OX=9615 GN=IPO7 PE=4 SV=1
tr|E2RAN6|E2RAN6_CANLF	Fructose-bisphosphatase 1 OS=Canis lupus familiaris OX=9615 GN=FBP1 PE=3 SV=1
tr|E7BUP9|E7BUP9_CANLF	Proteasome subunit beta OS=Canis lupus familiaris OX=9615 GN=PSMB7 PE=2 SV=1
tr|F1PHP1|F1PHP1_CANLF	Thioredoxin domain containing 5 OS=Canis lupus familiaris OX=9615 GN=TXNDC5 PE=3 SV=2
sp|E2RR58|RL12_CANLF	60S ribosomal protein L12 OS=Canis lupus familiaris OX=9615 GN=RPL12 PE=1 SV=1
tr|J9P1U4|J9P1U4_CANLF	Nuclear mitotic apparatus protein 1 OS=Canis lupus familiaris OX=9615 GN=NUMA1 PE=4 SV=1
tr|E2R8C6|E2R8C6_CANLF	USO1 vesicle transport factor OS=Canis lupus familiaris OX=9615 GN=USO1 PE=4 SV=2
tr|J9P870|J9P870_CANLF	Insulin like growth factor binding protein 6 OS=Canis lupus familiaris OX=9615 GN=IGFBP6 PE=4 SV=1
tr|E2RQF8|E2RQF8_CANLF	Uncharacterized protein OS=Canis lupus familiaris OX=9615 PE=4 SV=2
tr|E2QUS9|E2QUS9_CANLF	Coenzyme Q10B OS=Canis lupus familiaris OX=9615 GN=COQ10B PE=3 SV=2
tr|F1Q3Y0|F1Q3Y0_CANLF	Profilin OS=Canis lupus familiaris OX=9615 GN=PFN1 PE=3 SV=1
tr|F1PQG3|F1PQG3_CANLF	Endoplasmic reticulum protein 44 OS=Canis lupus familiaris OX=9615 GN=ERP44 PE=4 SV=2
tr|F1PRR4|F1PRR4_CANLF	Vasodilator-stimulated phosphoprotein OS=Canis lupus familiaris OX=9615 GN=VASP PE=3 SV=1
tr|E2R0S9|E2R0S9_CANLF	Family with sequence similarity 114 member A1 OS=Canis lupus familiaris OX=9615 GN=FAM114A1 PE=4 SV=2
tr|E2RMA1|E2RMA1_CANLF	Tumor protein, translationally-controlled 1 OS=Canis lupus familiaris OX=9615 GN=TPT1 PE=3 SV=1
sp|P79143|AMPN_CANLF	Aminopeptidase N OS=Canis lupus familiaris OX=9615 GN=ANPEP PE=1 SV=2
tr|F1PIA3|F1PIA3_CANLF	Fibrillin 1 OS=Canis lupus familiaris OX=9615 GN=FBN1 PE=4 SV=2
tr|J9NTX4|J9NTX4_CANLF	Tubulin-specific chaperone A OS=Canis lupus familiaris OX=9615 GN=TBCA PE=3 SV=1
tr|J9P5E0|J9P5E0_CANLF	Pyridoxal kinase OS=Canis lupus familiaris OX=9615 GN=PDXK PE=4 SV=1
tr|E2REB0|E2REB0_CANLF	Elastin microfibril interfacer 2 OS=Canis lupus familiaris OX=9615 GN=EMILIN2 PE=4 SV=1
tr|J9P3Q3|J9P3Q3_CANLF	Uncharacterized protein OS=Canis lupus familiaris OX=9615 PE=3 SV=1
tr|J9NUP0|J9NUP0_CANLF	MYB binding protein 1a OS=Canis lupus familiaris OX=9615 GN=MYBBP1A PE=4 SV=1
tr|E2RGR9|E2RGR9_CANLF	Fumarate hydratase OS=Canis lupus familiaris OX=9615 GN=FH PE=3 SV=1
tr|J9JHN1|J9JHN1_CANLF	RAB11B, member RAS oncogene family OS=Canis lupus familiaris OX=9615 GN=RAB11B PE=4 SV=1
sp|P00011|CYC_CANLF	Cytochrome c OS=Canis lupus familiaris OX=9615 GN=CYCS PE=1 SV=2
tr|E2QW49|E2QW49_CANLF	Uncharacterized protein OS=Canis lupus familiaris OX=9615 GN=PA2G4 PE=4 SV=1
sp|Q9TSZ6|DAG1_CANLF	Dystroglycan OS=Canis lupus familiaris OX=9615 GN=DAG1 PE=3 SV=1
tr|J9P0X7|J9P0X7_CANLF	Coactosin like F-actin binding protein 1 OS=Canis lupus familiaris OX=9615 GN=COTL1 PE=4 SV=1
tr|F6V9A6|F6V9A6_CANLF	Collagen type VI alpha 3 chain OS=Canis lupus familiaris OX=9615 GN=COL6A3 PE=4 SV=1
tr|F1PS66|F1PS66_CANLF	Collagen type XV alpha 1 chain OS=Canis lupus familiaris OX=9615 GN=COL15A1 PE=4 SV=1
tr|E2QWL1|E2QWL1_CANLF	Tropomodulin 3 OS=Canis lupus familiaris OX=9615 GN=TMOD3 PE=4 SV=1
tr|F6UY11|F6UY11_CANLF	Proteasome activator subunit 1 OS=Canis lupus familiaris OX=9615 GN=PSME1 PE=4 SV=1
tr|F1P969|F1P969_CANLF	Eukaryotic translation initiation factor 3 subunit B OS=Canis lupus familiaris OX=9615 GN=EIF3B PE=3 SV=2
tr|J9NXT9|J9NXT9_CANLF	Drebrin 1 OS=Canis lupus familiaris OX=9615 GN=DBN1 PE=4 SV=1
tr|E2QX17|E2QX17_CANLF	Proteasome subunit beta OS=Canis lupus familiaris OX=9615 GN=PSMB3 PE=3 SV=1
tr|E2RPN5|E2RPN5_CANLF	Phosphoserine phosphatase OS=Canis lupus familiaris OX=9615 GN=PSPH PE=4 SV=2
tr|E2RKT9|E2RKT9_CANLF	Uncharacterized protein OS=Canis lupus familiaris OX=9615 GN=UBE2L3 PE=3 SV=1
tr|F1PPT5|F1PPT5_CANLF	Septin 6 OS=Canis lupus familiaris OX=9615 GN=SEPT6 PE=3 SV=2
tr|E2R3R2|E2R3R2_CANLF	Proteasome subunit beta OS=Canis lupus familiaris OX=9615 GN=PSMB5 PE=3 SV=1
tr|E2QUU1|E2QUU1_CANLF	Eukaryotic translation initiation factor 3 subunit J OS=Canis lupus familiaris OX=9615 GN=EIF3J PE=3 SV=1
tr|F1PWN6|F1PWN6_CANLF	NSFL1 cofactor OS=Canis lupus familiaris OX=9615 GN=NSFL1C PE=4 SV=2
tr|F1PP87|F1PP87_CANLF	Dipeptidyl peptidase 3 OS=Canis lupus familiaris OX=9615 GN=DPP3 PE=3 SV=1
tr|F1PLV6|F1PLV6_CANLF	Fibulin-1 OS=Canis lupus familiaris OX=9615 GN=FBLN1 PE=3 SV=2
tr|J9NRH5|J9NRH5_CANLF	Tyrosine 3-monooxygenase/tryptophan 5-monooxygenase activation protein gamma OS=Canis lupus familiaris OX=9615 GN=YWHAG PE=3 SV=1
sp|Q711A6|HMGN2_CANLF	Non-histone chromosomal protein HMG-17 OS=Canis lupus familiaris OX=9615 GN=HMGN2 PE=3 SV=3
tr|F1PFK0|F1PFK0_CANLF	Twinfilin actin binding protein 1 OS=Canis lupus familiaris OX=9615 GN=TWF1 PE=4 SV=2
tr|J9P3K0|J9P3K0_CANLF	Myoferlin OS=Canis lupus familiaris OX=9615 GN=MYOF PE=4 SV=1
tr|J9NZ27|J9NZ27_CANLF	Calcium/calmodulin dependent serine protein kinase OS=Canis lupus familiaris OX=9615 GN=CASK PE=3 SV=1
tr|F1PKW7|F1PKW7_CANLF	Tyrosine 3-monooxygenase/tryptophan 5-monooxygenase activation protein beta OS=Canis lupus familiaris OX=9615 GN=YWHAB PE=3 SV=2
tr|F1PIV8|F1PIV8_CANLF	EF-hand domain family member D2 OS=Canis lupus familiaris OX=9615 GN=EFHD2 PE=4 SV=2
tr|E2RL80|E2RL80_CANLF	Proline and arginine rich end leucine rich repeat protein OS=Canis lupus familiaris OX=9615 GN=PRELP PE=4 SV=1
tr|J9P4X0|J9P4X0_CANLF	Nucleosome assembly protein 1 like 4 OS=Canis lupus familiaris OX=9615 GN=NAP1L4 PE=3 SV=1
tr|J9P9V0|J9P9V0_CANLF	Uncharacterized protein OS=Canis lupus familiaris OX=9615 PE=3 SV=1
tr|F1PKI4|F1PKI4_CANLF	Chloride intracellular channel protein OS=Canis lupus familiaris OX=9615 GN=CLIC1 PE=3 SV=2
tr|F1PFI5|F1PFI5_CANLF	Translin OS=Canis lupus familiaris OX=9615 GN=TSN PE=4 SV=2
tr|E2RH91|E2RH91_CANLF	Staphylococcal nuclease domain-containing protein OS=Canis lupus familiaris OX=9615 GN=SND1 PE=4 SV=2
tr|E2RBM3|E2RBM3_CANLF	Uncharacterized protein OS=Canis lupus familiaris OX=9615 GN=ETF1 PE=4 SV=1
tr|E2RGP2|E2RGP2_CANLF	Serpin family B member 6 OS=Canis lupus familiaris OX=9615 GN=SERPINB6 PE=3 SV=2
tr|E2QWN7|E2QWN7_CANLF	Lymphocyte cytosolic protein 1 OS=Canis lupus familiaris OX=9615 GN=LCP1 PE=4 SV=1
tr|F6Y478|F6Y478_CANLF	Uncharacterized protein OS=Canis lupus familiaris OX=9615 PE=3 SV=1
tr|E2R857|E2R857_CANLF	Bleomycin hydrolase OS=Canis lupus familiaris OX=9615 GN=BLMH PE=4 SV=1
tr|F1P9P7|F1P9P7_CANLF	Stromal cell derived factor 4 OS=Canis lupus familiaris OX=9615 GN=SDF4 PE=4 SV=2
tr|F1PS73|F1PS73_CANLF	Cystatin B OS=Canis lupus familiaris OX=9615 GN=CSTB PE=4 SV=2
tr|F1PWM7|F1PWM7_CANLF	Heat shock protein family B (small) member 6 OS=Canis lupus familiaris OX=9615 GN=HSPB6 PE=3 SV=2
tr|E2RPS0|E2RPS0_CANLF	Ubiquitin specific peptidase 14 OS=Canis lupus familiaris OX=9615 GN=USP14 PE=3 SV=2
tr|E2R5P5|E2R5P5_CANLF	Protein S100 OS=Canis lupus familiaris OX=9615 GN=S100A6 PE=3 SV=1
tr|J9P4U8|J9P4U8_CANLF	Calcyclin binding protein OS=Canis lupus familiaris OX=9615 GN=CACYBP PE=4 SV=1
tr|H9GW54|H9GW54_CANLF	Uncharacterized protein OS=Canis lupus familiaris OX=9615 GN=DBNL PE=4 SV=2
tr|F1PKY3|F1PKY3_CANLF	Adenosine deaminase OS=Canis lupus familiaris OX=9615 GN=ADA PE=3 SV=2
tr|E2RNS5|E2RNS5_CANLF	High density lipoprotein binding protein OS=Canis lupus familiaris OX=9615 GN=HDLBP PE=4 SV=1
tr|F1PWQ0|F1PWQ0_CANLF	Rab GDP dissociation inhibitor OS=Canis lupus familiaris OX=9615 GN=PLXNA3 PE=3 SV=2
tr|E2R3G3|E2R3G3_CANLF	Protein-L-isoaspartate O-methyltransferase OS=Canis lupus familiaris OX=9615 GN=PCMT1 PE=3 SV=1
tr|E2QVU9|E2QVU9_CANLF	Biliverdin reductase B OS=Canis lupus familiaris OX=9615 GN=BLVRB PE=4 SV=1
tr|J9P0W8|J9P0W8_CANLF	Dystonin OS=Canis lupus familiaris OX=9615 GN=DST PE=4 SV=1
tr|J9NVU2|J9NVU2_CANLF	Uncharacterized protein OS=Canis lupus familiaris OX=9615 PE=4 SV=1
tr|E2R9T6|E2R9T6_CANLF	Interleukin enhancer binding factor 2 OS=Canis lupus familiaris OX=9615 GN=ILF2 PE=4 SV=2
tr|E2R6Q7|E2R6Q7_CANLF	Cathepsin B OS=Canis lupus familiaris OX=9615 GN=CTSB PE=3 SV=1
tr|E2REA8|E2REA8_CANLF	COP9 signalosome subunit 2 OS=Canis lupus familiaris OX=9615 GN=COPS2 PE=4 SV=2
tr|F1PUR1|F1PUR1_CANLF	TROVE domain family member 2 OS=Canis lupus familiaris OX=9615 GN=TROVE2 PE=4 SV=2
tr|F1PY28|F1PY28_CANLF	Branched-chain-amino-acid aminotransferase OS=Canis lupus familiaris OX=9615 GN=BCAT1 PE=3 SV=2
tr|E2RCL4|E2RCL4_CANLF	40S ribosomal protein S21 OS=Canis lupus familiaris OX=9615 GN=RPS21 PE=3 SV=2
tr|E2R0B6|E2R0B6_CANLF	Proteasome subunit beta OS=Canis lupus familiaris OX=9615 GN=PSMB6 PE=3 SV=1
tr|F1Q466|F1Q466_CANLF	Acetyl-CoA acetyltransferase 2 OS=Canis lupus familiaris OX=9615 GN=ACAT2 PE=3 SV=1
tr|F1PPA1|F1PPA1_CANLF	Glypican 1 OS=Canis lupus familiaris OX=9615 GN=GPC1 PE=3 SV=1
tr|E2R4N7|E2R4N7_CANLF	40S ribosomal protein S12 OS=Canis lupus familiaris OX=9615 GN=RPS12 PE=3 SV=1
tr|E2QYH6|E2QYH6_CANLF	Scaffold attachment factor B OS=Canis lupus familiaris OX=9615 GN=SAFB PE=4 SV=2
tr|F1PVA9|F1PVA9_CANLF	SWI/SNF related, matrix associated, actin dependent regulator of chromatin subfamily c member 2 OS=Canis lupus familiaris OX=9615 GN=SMARCC2 PE=4 SV=2
tr|E2RCN3|E2RCN3_CANLF	Cell division cycle 37 OS=Canis lupus familiaris OX=9615 GN=CDC37 PE=4 SV=1
tr|E2R8Y3|E2R8Y3_CANLF	SEC22 homolog B, vesicle trafficking protein (gene/pseudogene) OS=Canis lupus familiaris OX=9615 GN=SEC22B PE=3 SV=2
tr|F1PLK4|F1PLK4_CANLF	Angiopoietin like 4 OS=Canis lupus familiaris OX=9615 GN=ANGPTL4 PE=4 SV=1
tr|F1PHK9|F1PHK9_CANLF	Laminin subunit gamma 1 OS=Canis lupus familiaris OX=9615 GN=LAMC1 PE=4 SV=2
tr|F1PEI2|F1PEI2_CANLF	Cytoskeleton associated protein 4 OS=Canis lupus familiaris OX=9615 GN=CKAP4 PE=4 SV=2
tr|J9P2G7|J9P2G7_CANLF	Cofilin 2 OS=Canis lupus familiaris OX=9615 GN=CFL2 PE=3 SV=1
tr|E2RKR4|E2RKR4_CANLF	Proteasome subunit alpha type OS=Canis lupus familiaris OX=9615 GN=PSMA3 PE=3 SV=1
tr|E2RC92|E2RC92_CANLF	Uncharacterized protein OS=Canis lupus familiaris OX=9615 GN=PFDN5 PE=3 SV=1
tr|J9NZA0|J9NZA0_CANLF	Uncharacterized protein OS=Canis lupus familiaris OX=9615 GN=PTMA PE=4 SV=1
tr|E2RGD3|E2RGD3_CANLF	Twinfilin actin binding protein 2 OS=Canis lupus familiaris OX=9615 GN=TWF2 PE=4 SV=2
tr|E2QZN8|E2QZN8_CANLF	Pentraxin 3 OS=Canis lupus familiaris OX=9615 GN=PTX3 PE=4 SV=1
tr|F1P7F8|F1P7F8_CANLF	Zyxin OS=Canis lupus familiaris OX=9615 GN=ZYX PE=4 SV=2
tr|E2R667|E2R667_CANLF	Coatomer subunit beta' OS=Canis lupus familiaris OX=9615 GN=COPB2 PE=3 SV=1
tr|F1PCT2|F1PCT2_CANLF	Mannose receptor C type 2 OS=Canis lupus familiaris OX=9615 GN=MRC2 PE=4 SV=2
tr|E2R7L1|E2R7L1_CANLF	Protein disulfide-isomerase A4 OS=Canis lupus familiaris OX=9615 GN=PDIA4 PE=3 SV=2
tr|F6Y2H4|F6Y2H4_CANLF	Serpin family E member 2 OS=Canis lupus familiaris OX=9615 GN=SERPINE2 PE=3 SV=1
tr|J9P504|J9P504_CANLF	Eukaryotic translation initiation factor 5B OS=Canis lupus familiaris OX=9615 GN=EIF5B PE=4 SV=1
tr|J9P1R5|J9P1R5_CANLF	3'(2'), 5'-bisphosphate nucleotidase 1 OS=Canis lupus familiaris OX=9615 GN=BPNT1 PE=4 SV=1
tr|E2RHB3|E2RHB3_CANLF	Apoptosis inhibitor 5 OS=Canis lupus familiaris OX=9615 GN=API5 PE=4 SV=1
tr|E2RPY9|E2RPY9_CANLF	Proteasome activator subunit 3 OS=Canis lupus familiaris OX=9615 GN=PSME3 PE=4 SV=2
tr|F1PYX9|F1PYX9_CANLF	Serpin family G member 1 OS=Canis lupus familiaris OX=9615 GN=SERPING1 PE=3 SV=2
tr|J9P3M1|J9P3M1_CANLF	LIM and SH3 protein 1 OS=Canis lupus familiaris OX=9615 GN=LASP1 PE=4 SV=1
tr|J9NT73|J9NT73_CANLF	Brain abundant membrane attached signal protein 1 OS=Canis lupus familiaris OX=9615 GN=BASP1 PE=4 SV=1
tr|E2RJQ2|E2RJQ2_CANLF	Far upstream element binding protein 1 OS=Canis lupus familiaris OX=9615 GN=FUBP1 PE=4 SV=2
tr|J9NRV6|J9NRV6_CANLF	Lactoylglutathione lyase OS=Canis lupus familiaris OX=9615 GN=GLO1 PE=3 SV=1
tr|E2RIV1|E2RIV1_CANLF	AP complex subunit beta OS=Canis lupus familiaris OX=9615 GN=AP2B1 PE=3 SV=2
tr|E2QXS7|E2QXS7_CANLF	Adenosylhomocysteinase OS=Canis lupus familiaris OX=9615 GN=AHCY PE=3 SV=2
tr|K0J6C5|K0J6C5_CANLF	Beta-N-acetylhexosaminidase beta subunit mRNA (Fragment) OS=Canis lupus familiaris OX=9615 GN=HEXB PE=2 SV=1
tr|E2RKK6|E2RKK6_CANLF	Protein kinase C substrate 80K-H OS=Canis lupus familiaris OX=9615 GN=PRKCSH PE=4 SV=2
tr|J9P1Q5|J9P1Q5_CANLF	Protein transport protein SEC23 OS=Canis lupus familiaris OX=9615 GN=SEC23A PE=3 SV=1
tr|E2R1J6|E2R1J6_CANLF	Eukaryotic translation initiation factor 3 subunit E OS=Canis lupus familiaris OX=9615 GN=EIF3E PE=3 SV=1
tr|J9P425|J9P425_CANLF	Ribosomal protein S19 OS=Canis lupus familiaris OX=9615 GN=RPS19 PE=4 SV=1
tr|E2RJ26|E2RJ26_CANLF	Proteasome 26S subunit, non-ATPase 11 OS=Canis lupus familiaris OX=9615 GN=PSMD11 PE=4 SV=2
tr|E2RT55|E2RT55_CANLF	COP9 signalosome subunit 4 OS=Canis lupus familiaris OX=9615 GN=COPS4 PE=4 SV=1
tr|E2RRN8|E2RRN8_CANLF	Vasorin OS=Canis lupus familiaris OX=9615 GN=VASN PE=4 SV=1
tr|J9PAS2|J9PAS2_CANLF	Uncharacterized protein OS=Canis lupus familiaris OX=9615 GN=HNRNPUL2 PE=4 SV=1
tr|E2RGG6|E2RGG6_CANLF	Eukaryotic translation initiation factor 3 subunit G OS=Canis lupus familiaris OX=9615 GN=EIF3G PE=3 SV=1
tr|E2RDU7|E2RDU7_CANLF	Palladin, cytoskeletal associated protein OS=Canis lupus familiaris OX=9615 GN=PALLD PE=4 SV=2
tr|E2R8A8|E2R8A8_CANLF	40S ribosomal protein S7 OS=Canis lupus familiaris OX=9615 GN=RPS7 PE=3 SV=2
tr|E2RPB8|E2RPB8_CANLF	C-type lectin domain family 3 member B OS=Canis lupus familiaris OX=9615 GN=CLEC3B PE=4 SV=2
tr|E2QW90|E2QW90_CANLF	Insulin like growth factor binding protein 4 OS=Canis lupus familiaris OX=9615 GN=IGFBP4 PE=4 SV=1
tr|F1PSS8|F1PSS8_CANLF	Protein S OS=Canis lupus familiaris OX=9615 GN=PROS1 PE=4 SV=2
tr|E2RPG3|E2RPG3_CANLF	AP-1 complex subunit gamma OS=Canis lupus familiaris OX=9615 GN=AP1G1 PE=3 SV=2
tr|E2RQ14|E2RQ14_CANLF	Annexin OS=Canis lupus familiaris OX=9615 GN=ANXA5 PE=2 SV=2
tr|E2RL17|E2RL17_CANLF	Eukaryotic translation initiation factor 2 subunit alpha OS=Canis lupus familiaris OX=9615 GN=EIF2S1 PE=4 SV=1
tr|E2RE67|E2RE67_CANLF	Cysteine rich protein 1 OS=Canis lupus familiaris OX=9615 GN=CRIP1 PE=4 SV=1
tr|E2R580|E2R580_CANLF	VAMP associated protein A OS=Canis lupus familiaris OX=9615 GN=VAPA PE=4 SV=1
tr|J9NVP2|J9NVP2_CANLF	Stathmin OS=Canis lupus familiaris OX=9615 GN=STMN1 PE=3 SV=1
tr|E2R1E3|E2R1E3_CANLF	3'-phosphoadenosine 5'-phosphosulfate synthase 2 OS=Canis lupus familiaris OX=9615 GN=PAPSS2 PE=3 SV=1
tr|E2RM92|E2RM92_CANLF	Dynein cytoplasmic 1 intermediate chain 2 OS=Canis lupus familiaris OX=9615 GN=DYNC1I2 PE=4 SV=2
tr|F1P890|F1P890_CANLF	Neural precursor cell expressed, developmentally down-regulated 8 OS=Canis lupus familiaris OX=9615 GN=NEDD8 PE=4 SV=2
tr|E2RN10|E2RN10_CANLF	Beta-2-microglobulin OS=Canis lupus familiaris OX=9615 GN=B2M PE=1 SV=2
tr|F1PLA1|F1PLA1_CANLF	Latent transforming growth factor beta binding protein 1 OS=Canis lupus familiaris OX=9615 GN=LTBP1 PE=4 SV=2
tr|J9NS50|J9NS50_CANLF	Uncharacterized protein OS=Canis lupus familiaris OX=9615 GN=HINT1 PE=4 SV=1
tr|E2REP2|E2REP2_CANLF	TRK-fused gene OS=Canis lupus familiaris OX=9615 GN=TFG PE=4 SV=1
tr|F1PHR6|F1PHR6_CANLF	Eukaryotic translation initiation factor 3 subunit L OS=Canis lupus familiaris OX=9615 GN=EIF3L PE=3 SV=2
tr|A0A346JM01|A0A346JM01_CANLF	Protein S100 OS=Canis lupus familiaris OX=9615 GN=S100A4 PE=2 SV=1
tr|E2RRD2|E2RRD2_CANLF	Uncharacterized protein OS=Canis lupus familiaris OX=9615 PE=3 SV=2
tr|E2RNL3|E2RNL3_CANLF	Peroxiredoxin 4 OS=Canis lupus familiaris OX=9615 GN=PRDX4 PE=4 SV=1
tr|E2RMK6|E2RMK6_CANLF	Eukaryotic translation initiation factor 2 subunit gamma OS=Canis lupus familiaris OX=9615 GN=EIF2S3 PE=4 SV=1
tr|F1P7L2|F1P7L2_CANLF	Uncharacterized protein OS=Canis lupus familiaris OX=9615 GN=PSMD5 PE=4 SV=1
tr|E2RTJ7|E2RTJ7_CANLF	Valyl-tRNA synthetase OS=Canis lupus familiaris OX=9615 GN=VARS PE=3 SV=2
tr|J9PA62|J9PA62_CANLF	Eukaryotic translation initiation factor 1 OS=Canis lupus familiaris OX=9615 GN=EIF1 PE=4 SV=1
tr|E2RQ24|E2RQ24_CANLF	Myosin light chain 1 OS=Canis lupus familiaris OX=9615 GN=MYL1 PE=4 SV=2
tr|J9P7I4|J9P7I4_CANLF	Trifunctional purine biosynthetic protein adenosine-3 OS=Canis lupus familiaris OX=9615 GN=LOC100856570 PE=3 SV=1
tr|J9NXY7|J9NXY7_CANLF	PDZ and LIM domain 1 OS=Canis lupus familiaris OX=9615 GN=PDLIM1 PE=4 SV=1
tr|F1PLS0|F1PLS0_CANLF	Sec1 family domain containing 1 OS=Canis lupus familiaris OX=9615 GN=SCFD1 PE=3 SV=2
sp|Q9TTY1|TIMP2_CANLF	Metalloproteinase inhibitor 2 OS=Canis lupus familiaris OX=9615 GN=TIMP2 PE=2 SV=2
tr|F1PG59|F1PG59_CANLF	COP9 signalosome subunit 6 OS=Canis lupus familiaris OX=9615 GN=COPS6 PE=4 SV=2
tr|E2R944|E2R944_CANLF	Heterogeneous nuclear ribonucleoprotein L OS=Canis lupus familiaris OX=9615 GN=HNRNPL PE=4 SV=2
tr|E2QYQ0|E2QYQ0_CANLF	Adenine phosphoribosyltransferase OS=Canis lupus familiaris OX=9615 GN=APRT PE=3 SV=1
tr|E2R9K4|E2R9K4_CANLF	Exportin 1 OS=Canis lupus familiaris OX=9615 GN=XPO1 PE=4 SV=2
tr|F1PLR0|F1PLR0_CANLF	Receptor for activated C kinase 1 OS=Canis lupus familiaris OX=9615 GN=RACK1 PE=4 SV=2
tr|F1PE64|F1PE64_CANLF	Calsyntenin 1 OS=Canis lupus familiaris OX=9615 GN=CLSTN1 PE=4 SV=1
tr|F1PWX2|F1PWX2_CANLF	Reticulocalbin 1 OS=Canis lupus familiaris OX=9615 GN=RCN1 PE=4 SV=2
tr|E2RGH5|E2RGH5_CANLF	Ubiquitin like modifier activating enzyme 1 OS=Canis lupus familiaris OX=9615 GN=UBA1 PE=3 SV=2
tr|E2R8R8|E2R8R8_CANLF	Ribosomal protein S9 OS=Canis lupus familiaris OX=9615 GN=RPS9 PE=3 SV=1
tr|E2R4H4|E2R4H4_CANLF	Proteasome endopeptidase complex OS=Canis lupus familiaris OX=9615 GN=PSMA5 PE=3 SV=2
tr|F1PAB7|F1PAB7_CANLF	Aldehyde dehydrogenase 9 family member A1 OS=Canis lupus familiaris OX=9615 GN=ALDH9A1 PE=3 SV=2
tr|E2QY30|E2QY30_CANLF	High mobility group box 2 OS=Canis lupus familiaris OX=9615 GN=HMGB2 PE=4 SV=1
tr|E2QV12|E2QV12_CANLF	Phosphoglucomutase 2 OS=Canis lupus familiaris OX=9615 GN=PGM2 PE=4 SV=1
tr|E2RPU0|E2RPU0_CANLF	Mesencephalic astrocyte derived neurotrophic factor OS=Canis lupus familiaris OX=9615 GN=MANF PE=4 SV=2
tr|F1PW10|F1PW10_CANLF	Transforming growth factor beta induced OS=Canis lupus familiaris OX=9615 GN=TGFBI PE=4 SV=2
tr|F6XAE9|F6XAE9_CANLF	RNA-binding protein 8A OS=Canis lupus familiaris OX=9615 GN=RBM8A PE=3 SV=1
tr|F1PSK3|F1PSK3_CANLF	SH3 domain binding glutamate rich protein like 3 OS=Canis lupus familiaris OX=9615 GN=SH3BGRL3 PE=4 SV=2
tr|J9JHG4|J9JHG4_CANLF	ENAH, actin regulator OS=Canis lupus familiaris OX=9615 GN=ENAH PE=4 SV=1
tr|J9NRG5|J9NRG5_CANLF	SEC31 homolog A, COPII coat complex component OS=Canis lupus familiaris OX=9615 GN=SEC31A PE=4 SV=1
tr|F1Q3G5|F1Q3G5_CANLF	Leucine rich repeat containing 59 OS=Canis lupus familiaris OX=9615 GN=LRRC59 PE=4 SV=2
tr|F6X5M3|F6X5M3_CANLF	Clathrin light chain OS=Canis lupus familiaris OX=9615 GN=CLTB PE=3 SV=1
tr|E2R7P6|E2R7P6_CANLF	Thyroid hormone receptor associated protein 3 OS=Canis lupus familiaris OX=9615 GN=THRAP3 PE=4 SV=1
tr|F1PKF6|F1PKF6_CANLF	Splicing factor 3b subunit 1 OS=Canis lupus familiaris OX=9615 GN=SF3B1 PE=4 SV=2
tr|F1PWA9|F1PWA9_CANLF	N-acylsphingosine amidohydrolase 1 OS=Canis lupus familiaris OX=9615 GN=ASAH1 PE=4 SV=2
tr|F1PUM3|F1PUM3_CANLF	Glutathione S-transferase omega 1 OS=Canis lupus familiaris OX=9615 GN=GSTO1 PE=4 SV=2
tr|F1P914|F1P914_CANLF	Major vault protein OS=Canis lupus familiaris OX=9615 GN=MVP PE=4 SV=2
tr|E2R507|E2R507_CANLF	Fatty acid binding protein 3 OS=Canis lupus familiaris OX=9615 GN=FABP3 PE=3 SV=1
tr|J9P3T9|J9P3T9_CANLF	RAN binding protein 1 OS=Canis lupus familiaris OX=9615 GN=RANBP1 PE=4 SV=1
tr|F1P7S2|F1P7S2_CANLF	EH domain binding protein 1 like 1 OS=Canis lupus familiaris OX=9615 GN=EHBP1L1 PE=4 SV=2
tr|F1PHZ3|F1PHZ3_CANLF	Phosphatidylinositol transfer protein beta OS=Canis lupus familiaris OX=9615 GN=PITPNB PE=4 SV=2
tr|E2RBU1|E2RBU1_CANLF	Serine/threonine kinase receptor associated protein OS=Canis lupus familiaris OX=9615 GN=STRAP PE=4 SV=2
tr|F1PFB3|F1PFB3_CANLF	Glutaredoxin 3 OS=Canis lupus familiaris OX=9615 GN=GLRX3 PE=4 SV=2
tr|E2R0R3|E2R0R3_CANLF	Semaphorin 3C OS=Canis lupus familiaris OX=9615 GN=SEMA3C PE=3 SV=2
tr|E2RQC9|E2RQC9_CANLF	RuvB-like helicase OS=Canis lupus familiaris OX=9615 GN=RUVBL1 PE=3 SV=2
tr|F1PF02|F1PF02_CANLF	Proteasome subunit beta OS=Canis lupus familiaris OX=9615 GN=PSMB1 PE=3 SV=2
tr|E2R925|E2R925_CANLF	Reticulon OS=Canis lupus familiaris OX=9615 GN=RTN4 PE=4 SV=2
tr|E2QS94|E2QS94_CANLF	Reactive intermediate imine deaminase A homolog OS=Canis lupus familiaris OX=9615 GN=RIDA PE=4 SV=1
tr|E2RLF1|E2RLF1_CANLF	Prosaposin OS=Canis lupus familiaris OX=9615 GN=PSAP PE=4 SV=1
tr|J9NXC6|J9NXC6_CANLF	Eukaryotic translation elongation factor 1 beta 2 OS=Canis lupus familiaris OX=9615 GN=EEF1B2 PE=4 SV=1
tr|E2R1C3|E2R1C3_CANLF	Proteasome subunit alpha type OS=Canis lupus familiaris OX=9615 PE=3 SV=2
tr|J9NYQ8|J9NYQ8_CANLF	Eukaryotic translation initiation factor 1A X-linked OS=Canis lupus familiaris OX=9615 GN=EIF1AX PE=3 SV=1
tr|E2QUY2|E2QUY2_CANLF	ABRA C-terminal like OS=Canis lupus familiaris OX=9615 GN=ABRACL PE=4 SV=1
tr|E2QYG6|E2QYG6_CANLF	ATPase H+ transporting V1 subunit A OS=Canis lupus familiaris OX=9615 GN=ATP6V1A PE=3 SV=1
tr|J9P5I1|J9P5I1_CANLF	S-methyl-5'-thioadenosine phosphorylase OS=Canis lupus familiaris OX=9615 GN=MTAP PE=3 SV=1
tr|J9NVT2|J9NVT2_CANLF	Hypoxanthine phosphoribosyltransferase OS=Canis lupus familiaris OX=9615 GN=HPRT1 PE=3 SV=1
tr|E2R6L1|E2R6L1_CANLF	Tankyrase 1 binding protein 1 OS=Canis lupus familiaris OX=9615 GN=TNKS1BP1 PE=4 SV=1
tr|F1PV92|F1PV92_CANLF	Citrate synthase OS=Canis lupus familiaris OX=9615 GN=CS PE=3 SV=2
tr|J9NWK3|J9NWK3_CANLF	Sushi, von Willebrand factor type A, EGF and pentraxin domain containing 1 OS=Canis lupus familiaris OX=9615 GN=SVEP1 PE=4 SV=1
tr|E2R2I5|E2R2I5_CANLF	Ubiquitin conjugating enzyme E2 V1 OS=Canis lupus familiaris OX=9615 GN=UBE2V1 PE=4 SV=1
tr|F1PU14|F1PU14_CANLF	PDGFA associated protein 1 OS=Canis lupus familiaris OX=9615 GN=PDAP1 PE=4 SV=2
tr|E2RGK2|E2RGK2_CANLF	Adenylosuccinate lyase OS=Canis lupus familiaris OX=9615 GN=TNRC6B PE=3 SV=1
tr|E2RHY8|E2RHY8_CANLF	Farnesyltransferase, CAAX box, alpha OS=Canis lupus familiaris OX=9615 GN=FNTA PE=4 SV=1
tr|E2RF76|E2RF76_CANLF	Chordin like 1 OS=Canis lupus familiaris OX=9615 GN=CHRDL1 PE=4 SV=2
tr|E2QTC7|E2QTC7_CANLF	Peptidylprolyl isomerase D OS=Canis lupus familiaris OX=9615 GN=PPID PE=4 SV=1
tr|E2QUJ4|E2QUJ4_CANLF	Uncharacterized protein OS=Canis lupus familiaris OX=9615 PE=4 SV=1
tr|J9NTT2|J9NTT2_CANLF	Acyl-CoA-binding protein OS=Canis lupus familiaris OX=9615 GN=DBI PE=4 SV=1
sp|E2RH47|RS3_CANLF	40S ribosomal protein S3 OS=Canis lupus familiaris OX=9615 GN=RPS3 PE=1 SV=1
tr|E2QXP3|E2QXP3_CANLF	Arginyl aminopeptidase OS=Canis lupus familiaris OX=9615 GN=RNPEP PE=4 SV=2
tr|E2QYN4|E2QYN4_CANLF	ATP synthase inhibitory factor subunit 1 OS=Canis lupus familiaris OX=9615 GN=ATP5IF1 PE=4 SV=1
tr|F1PNB8|F1PNB8_CANLF	Uncharacterized protein OS=Canis lupus familiaris OX=9615 GN=AKR1B1 PE=4 SV=2
tr|E2QTN0|E2QTN0_CANLF	Kinesin-like protein OS=Canis lupus familiaris OX=9615 GN=KIF5B PE=3 SV=1
sp|P62825|RAN_CANLF	GTP-binding nuclear protein Ran OS=Canis lupus familiaris OX=9615 GN=RAN PE=1 SV=3
tr|E2QXI3|E2QXI3_CANLF	Uncharacterized protein OS=Canis lupus familiaris OX=9615 GN=AIMP1 PE=4 SV=2
tr|E2RTD6|E2RTD6_CANLF	Hydroxymethylbilane synthase OS=Canis lupus familiaris OX=9615 GN=HMBS PE=3 SV=1
tr|E2RD65|E2RD65_CANLF	Actin-related protein 2/3 complex subunit 5 OS=Canis lupus familiaris OX=9615 GN=ARPC5 PE=3 SV=2
tr|E2R0S6|E2R0S6_CANLF	Annexin OS=Canis lupus familiaris OX=9615 GN=ANXA8L1 PE=3 SV=2
tr|Q32KH2|Q32KH2_CANLF	Extracellular sulfatase OS=Canis lupus familiaris OX=9615 GN=SULF1 PE=2 SV=1
tr|F1Q057|F1Q057_CANLF	Peroxidasin OS=Canis lupus familiaris OX=9615 GN=PXDN PE=4 SV=2
tr|F1PIG2|F1PIG2_CANLF	UMP-CMP kinase OS=Canis lupus familiaris OX=9615 GN=CMPK1 PE=3 SV=2
tr|F1PNS6|F1PNS6_CANLF	Peptidase D OS=Canis lupus familiaris OX=9615 GN=PEPD PE=3 SV=2
tr|F1PSK6|F1PSK6_CANLF	EH domain containing 1 OS=Canis lupus familiaris OX=9615 GN=EHD1 PE=3 SV=2
tr|A0A0B4J195|A0A0B4J195_CANLF	Aspartate aminotransferase OS=Canis lupus familiaris OX=9615 GN=GOT1 PE=4 SV=1
tr|F1P7P3|F1P7P3_CANLF	Uncharacterized protein OS=Canis lupus familiaris OX=9615 GN=CAPZA1 PE=3 SV=1
tr|E2QWU0|E2QWU0_CANLF	Actin-related protein 2/3 complex subunit 4 OS=Canis lupus familiaris OX=9615 GN=ARPC4 PE=3 SV=2
tr|E2RFF1|E2RFF1_CANLF	DEAD-box helicase 42 OS=Canis lupus familiaris OX=9615 GN=DDX42 PE=4 SV=1
tr|F6UXI8|F6UXI8_CANLF	Inosine-5'-monophosphate dehydrogenase OS=Canis lupus familiaris OX=9615 GN=IMPDH2 PE=3 SV=1
tr|E2RLQ6|E2RLQ6_CANLF	6-phosphogluconolactonase OS=Canis lupus familiaris OX=9615 GN=PGLS PE=4 SV=1
tr|E2QXF2|E2QXF2_CANLF	Legumain OS=Canis lupus familiaris OX=9615 GN=LGMN PE=4 SV=1
tr|F1PVI2|F1PVI2_CANLF	Aspartyl aminopeptidase OS=Canis lupus familiaris OX=9615 GN=DNPEP PE=3 SV=2
tr|E2QWN4|E2QWN4_CANLF	N-acetylneuraminate synthase OS=Canis lupus familiaris OX=9615 GN=NANS PE=4 SV=1
tr|F6UV28|F6UV28_CANLF	Translocated promoter region, nuclear basket protein OS=Canis lupus familiaris OX=9615 GN=TPR PE=4 SV=1
tr|E2RD72|E2RD72_CANLF	Discs large MAGUK scaffold protein 1 OS=Canis lupus familiaris OX=9615 GN=DLG1 PE=3 SV=2
tr|E2RTE0|E2RTE0_CANLF	Transforming growth factor beta 1 induced transcript 1 OS=Canis lupus familiaris OX=9615 GN=TGFB1I1 PE=4 SV=2
tr|F1PB24|F1PB24_CANLF	Huntingtin interacting protein 1 OS=Canis lupus familiaris OX=9615 GN=HIP1 PE=4 SV=2
tr|F1PKB2|F1PKB2_CANLF	Alpha-mannosidase OS=Canis lupus familiaris OX=9615 GN=MAN2B1 PE=3 SV=2
tr|F1PBJ4|F1PBJ4_CANLF	FUS RNA binding protein OS=Canis lupus familiaris OX=9615 GN=FUS PE=4 SV=2
tr|F1PAT6|F1PAT6_CANLF	cAMP-dependent protein kinase catalytic subunit alpha OS=Canis lupus familiaris OX=9615 GN=PRKACA PE=3 SV=1
tr|F1PZ47|F1PZ47_CANLF	Eukaryotic translation initiation factor 2 subunit beta OS=Canis lupus familiaris OX=9615 GN=EIF2S2 PE=4 SV=2
tr|F1PQ40|F1PQ40_CANLF	Proteasome 26S subunit, ATPase 1 OS=Canis lupus familiaris OX=9615 GN=PSMC1 PE=3 SV=2
tr|F1PD77|F1PD77_CANLF	Proteasome activator subunit 2 OS=Canis lupus familiaris OX=9615 GN=PSME2 PE=4 SV=2
tr|E2R8L4|E2R8L4_CANLF	Pseudouridine 5'-phosphatase OS=Canis lupus familiaris OX=9615 GN=PUDP PE=4 SV=2
tr|F1PL92|F1PL92_CANLF	Aly/REF export factor OS=Canis lupus familiaris OX=9615 GN=ALYREF PE=4 SV=2
tr|E2RGE0|E2RGE0_CANLF	Barrier to autointegration factor 1 OS=Canis lupus familiaris OX=9615 GN=BANF1 PE=4 SV=1
tr|F1PIA2|F1PIA2_CANLF	Ubiquitin thioesterase OS=Canis lupus familiaris OX=9615 GN=OTUB1 PE=3 SV=2
tr|J9P095|J9P095_CANLF	Stanniocalcin 2 OS=Canis lupus familiaris OX=9615 GN=STC2 PE=4 SV=1
tr|Z4YHH2|Z4YHH2_CANLF	Tripeptidyl-peptidase 1 OS=Canis lupus familiaris OX=9615 GN=TPP1 PE=4 SV=1
tr|E2R1X9|E2R1X9_CANLF	Growth associated protein 43 OS=Canis lupus familiaris OX=9615 GN=GAP43 PE=4 SV=1
tr|J9P396|J9P396_CANLF	Vesicular integral-membrane protein VIP36 OS=Canis lupus familiaris OX=9615 GN=LMAN2 PE=4 SV=1
tr|J9P423|J9P423_CANLF	CD44 antigen OS=Canis lupus familiaris OX=9615 GN=CD44 PE=4 SV=1
tr|E2R1M6|E2R1M6_CANLF	Phosphohistidine phosphatase 1 OS=Canis lupus familiaris OX=9615 GN=PHPT1 PE=4 SV=2
tr|J9P798|J9P798_CANLF	Uncharacterized protein OS=Canis lupus familiaris OX=9615 GN=RPS15A PE=3 SV=1
tr|E2RMS5|E2RMS5_CANLF	Uncharacterized protein OS=Canis lupus familiaris OX=9615 GN=HYPK PE=4 SV=2
tr|E2R9Y9|E2R9Y9_CANLF	Uncharacterized protein OS=Canis lupus familiaris OX=9615 GN=RPLP2 PE=3 SV=1
tr|E2RRD1|E2RRD1_CANLF	Protein kinase cAMP-dependent type II regulatory subunit alpha OS=Canis lupus familiaris OX=9615 GN=PRKAR2A PE=4 SV=2
tr|E2RQS7|E2RQS7_CANLF	Peptidylprolyl isomerase OS=Canis lupus familiaris OX=9615 GN=FKBP3 PE=4 SV=1
tr|E2QWD3|E2QWD3_CANLF	CRK proto-oncogene, adaptor protein OS=Canis lupus familiaris OX=9615 GN=CRK PE=4 SV=2
tr|J9NXJ1|J9NXJ1_CANLF	Nudix hydrolase 5 OS=Canis lupus familiaris OX=9615 GN=NUDT5 PE=3 SV=1
tr|F1PAG5|F1PAG5_CANLF	Vesicle amine transport 1 OS=Canis lupus familiaris OX=9615 GN=VAT1 PE=4 SV=2
tr|F1Q2F6|F1Q2F6_CANLF	Fatty acid synthase OS=Canis lupus familiaris OX=9615 GN=FASN PE=4 SV=2
tr|E2RAG6|E2RAG6_CANLF	BCL2 associated athanogene 5 OS=Canis lupus familiaris OX=9615 GN=BAG5 PE=4 SV=2
tr|E2RQE7|E2RQE7_CANLF	NSF attachment protein alpha OS=Canis lupus familiaris OX=9615 GN=NAPA PE=4 SV=1
tr|E2R1Z0|E2R1Z0_CANLF	Four and a half LIM domains 1 OS=Canis lupus familiaris OX=9615 GN=FHL1 PE=4 SV=2
tr|E2RJU3|E2RJU3_CANLF	Eukaryotic translation initiation factor 5 OS=Canis lupus familiaris OX=9615 GN=EIF5 PE=4 SV=1
tr|F1P6E1|F1P6E1_CANLF	Complement C1s OS=Canis lupus familiaris OX=9615 GN=C1S PE=3 SV=2
tr|Q9MZD3|Q9MZD3_CANLF	Peptidyl-prolyl cis-trans isomerase (Fragment) OS=Canis lupus familiaris OX=9615 PE=2 SV=1
tr|E2RPI9|E2RPI9_CANLF	Clathrin light chain OS=Canis lupus familiaris OX=9615 GN=CLTA PE=3 SV=1
sp|P61162|ACTZ_CANLF	Alpha-centractin OS=Canis lupus familiaris OX=9615 GN=ACTR1A PE=2 SV=1
tr|F1PK29|F1PK29_CANLF	Ribonuclease/angiogenin inhibitor 1 OS=Canis lupus familiaris OX=9615 GN=RNH1 PE=4 SV=2
tr|E2QWG8|E2QWG8_CANLF	Eukaryotic translation initiation factor 3 subunit M OS=Canis lupus familiaris OX=9615 GN=EIF3M PE=3 SV=1
tr|F1PIV3|F1PIV3_CANLF	Serpin family B member 8 OS=Canis lupus familiaris OX=9615 GN=SERPINB8 PE=3 SV=2
tr|E2RBW8|E2RBW8_CANLF	Asporin OS=Canis lupus familiaris OX=9615 GN=ASPN PE=3 SV=1
tr|F1P7S9|F1P7S9_CANLF	Serine/threonine-protein phosphatase OS=Canis lupus familiaris OX=9615 GN=PPP1CB PE=3 SV=2
tr|E2R7N5|E2R7N5_CANLF	Coronin OS=Canis lupus familiaris OX=9615 GN=CORO1B PE=3 SV=1
tr|F1PSZ2|F1PSZ2_CANLF	Heat shock protein family H (Hsp110) member 1 OS=Canis lupus familiaris OX=9615 GN=HSPH1 PE=3 SV=2
tr|E2RHW7|E2RHW7_CANLF	Threonyl-tRNA synthetase OS=Canis lupus familiaris OX=9615 GN=TARS PE=3 SV=1
tr|J9P7W8|J9P7W8_CANLF	Inositol-1-monophosphatase OS=Canis lupus familiaris OX=9615 GN=IMPA1 PE=3 SV=1
tr|E2RRT4|E2RRT4_CANLF	Splicing factor 1 OS=Canis lupus familiaris OX=9615 GN=SF1 PE=4 SV=2
tr|E2RTL4|E2RTL4_CANLF	Procollagen-lysine,2-oxoglutarate 5-dioxygenase 3 OS=Canis lupus familiaris OX=9615 GN=PLOD3 PE=4 SV=2
tr|E2QWY6|E2QWY6_CANLF	Uncharacterized protein OS=Canis lupus familiaris OX=9615 GN=RPS2 PE=3 SV=2
tr|E2QXC6|E2QXC6_CANLF	Uncharacterized protein OS=Canis lupus familiaris OX=9615 GN=CBX3 PE=4 SV=2
tr|E2RR16|E2RR16_CANLF	UDP-glucose glycoprotein glucosyltransferase 1 OS=Canis lupus familiaris OX=9615 GN=UGGT1 PE=4 SV=2
tr|J9NZA2|J9NZA2_CANLF	Dynamin 1 like OS=Canis lupus familiaris OX=9615 GN=DNM1L PE=3 SV=1
tr|E2R6W9|E2R6W9_CANLF	Ubiquitin conjugating enzyme E2 K OS=Canis lupus familiaris OX=9615 GN=UBE2K PE=3 SV=1
tr|F1PVB6|F1PVB6_CANLF	Extended synaptotagmin 1 OS=Canis lupus familiaris OX=9615 GN=ESYT1 PE=4 SV=2
tr|J9P430|J9P430_CANLF	Uncharacterized protein OS=Canis lupus familiaris OX=9615 GN=LOC477072 PE=3 SV=1
tr|F1P903|F1P903_CANLF	Complement C1r OS=Canis lupus familiaris OX=9615 GN=C1R PE=3 SV=2
tr|E2R0D6|E2R0D6_CANLF	Proliferating cell nuclear antigen OS=Canis lupus familiaris OX=9615 GN=PCNA PE=3 SV=1
tr|J9P6R1|J9P6R1_CANLF	Proteasome 26S subunit, non-ATPase 7 OS=Canis lupus familiaris OX=9615 GN=PSMD7 PE=4 SV=1
tr|E2RH59|E2RH59_CANLF	Glucosamine-6-phosphate isomerase OS=Canis lupus familiaris OX=9615 GN=GNPDA2 PE=3 SV=2
tr|F1PLD5|F1PLD5_CANLF	KH RNA binding domain containing, signal transduction associated 1 OS=Canis lupus familiaris OX=9615 GN=KHDRBS1 PE=4 SV=2
tr|F1PLJ6|F1PLJ6_CANLF	Myosin phosphatase Rho interacting protein OS=Canis lupus familiaris OX=9615 GN=MPRIP PE=4 SV=2
tr|F1Q1C5|F1Q1C5_CANLF	Staufen double-stranded RNA binding protein 1 OS=Canis lupus familiaris OX=9615 GN=STAU1 PE=4 SV=2
tr|E2R119|E2R119_CANLF	Uncharacterized protein OS=Canis lupus familiaris OX=9615 GN=CYB5A PE=3 SV=1
tr|J9P4N7|J9P4N7_CANLF	Nephroblastoma overexpressed OS=Canis lupus familiaris OX=9615 GN=NOV PE=4 SV=1
tr|E2R599|E2R599_CANLF	Carboxypeptidase Q OS=Canis lupus familiaris OX=9615 GN=CPQ PE=4 SV=1
tr|E2RN02|E2RN02_CANLF	Platelet activating factor acetylhydrolase 1b catalytic subunit 2 OS=Canis lupus familiaris OX=9615 GN=PAFAH1B2 PE=4 SV=1
tr|E2QZV2|E2QZV2_CANLF	DDRGK domain containing 1 OS=Canis lupus familiaris OX=9615 GN=DDRGK1 PE=4 SV=2
tr|F1PCK1|F1PCK1_CANLF	Pappalysin 1 OS=Canis lupus familiaris OX=9615 GN=PAPPA PE=4 SV=1
tr|J9NYC2|J9NYC2_CANLF	Uncharacterized protein OS=Canis lupus familiaris OX=9615 PE=3 SV=1
tr|J9P127|J9P127_CANLF	Thymosin beta OS=Canis lupus familiaris OX=9615 GN=LOC102152706 PE=3 SV=1
tr|F1PLU5|F1PLU5_CANLF	Prefoldin subunit 2 OS=Canis lupus familiaris OX=9615 GN=PFDN2 PE=4 SV=2
tr|E2RJH2|E2RJH2_CANLF	ATPase H+ transporting accessory protein 2 OS=Canis lupus familiaris OX=9615 GN=ATP6AP2 PE=4 SV=2
tr|E2QY31|E2QY31_CANLF	Platelet-activating factor acetylhydrolase IB subunit alpha OS=Canis lupus familiaris OX=9615 GN=PAFAH1B1 PE=3 SV=1
tr|F1PHT0|F1PHT0_CANLF	La ribonucleoprotein domain family member 1 OS=Canis lupus familiaris OX=9615 GN=LARP1 PE=4 SV=2
tr|F1PRE1|F1PRE1_CANLF	Nucleosome assembly protein 1 like 1 OS=Canis lupus familiaris OX=9615 GN=NAP1L1 PE=3 SV=2
tr|F1PU58|F1PU58_CANLF	Cullin 3 OS=Canis lupus familiaris OX=9615 GN=CUL3 PE=3 SV=1
tr|F1Q1F5|F1Q1F5_CANLF	Peptidylprolyl isomerase OS=Canis lupus familiaris OX=9615 GN=FKBP9 PE=4 SV=2
tr|F1PD37|F1PD37_CANLF	Serine/threonine-protein phosphatase 2A activator OS=Canis lupus familiaris OX=9615 GN=PTPA PE=3 SV=2
tr|J9NYE0|J9NYE0_CANLF	Uncharacterized protein OS=Canis lupus familiaris OX=9615 GN=COPS8 PE=4 SV=1
tr|E2RA27|E2RA27_CANLF	BCL2 associated athanogene 3 OS=Canis lupus familiaris OX=9615 GN=BAG3 PE=4 SV=1
tr|F1P6U4|F1P6U4_CANLF	Uncharacterized protein OS=Canis lupus familiaris OX=9615 GN=IDE PE=3 SV=2
tr|E2R5Q1|E2R5Q1_CANLF	Calponin OS=Canis lupus familiaris OX=9615 GN=CNN2 PE=3 SV=1
tr|A0A140T8E0|A0A140T8E0_CANLF	Cell cycle associated protein 1 OS=Canis lupus familiaris OX=9615 GN=CAPRIN1 PE=4 SV=1
tr|E2QXR8|E2QXR8_CANLF	RB binding protein 4, chromatin remodeling factor OS=Canis lupus familiaris OX=9615 GN=RBBP4 PE=4 SV=1
tr|F1PUM6|F1PUM6_CANLF	Vitronectin OS=Canis lupus familiaris OX=9615 GN=VTN PE=4 SV=1
tr|E2R1R4|E2R1R4_CANLF	Uncharacterized protein OS=Canis lupus familiaris OX=9615 GN=ATP6V1E1 PE=3 SV=1
tr|J9P1T3|J9P1T3_CANLF	Inter-alpha-trypsin inhibitor heavy chain family member 5 OS=Canis lupus familiaris OX=9615 GN=ITIH5 PE=4 SV=1
tr|J9P309|J9P309_CANLF	Actin-related protein 2/3 complex subunit 3 OS=Canis lupus familiaris OX=9615 PE=3 SV=1
tr|F1Q4F1|F1Q4F1_CANLF	Oxysterol-binding protein OS=Canis lupus familiaris OX=9615 GN=OSBP PE=3 SV=2
tr|E2RAM9|E2RAM9_CANLF	Sulfotransferase OS=Canis lupus familiaris OX=9615 GN=SULT1C4 PE=3 SV=2
tr|F1PFI3|F1PFI3_CANLF	Phospholipase C beta 3 OS=Canis lupus familiaris OX=9615 GN=PLCB3 PE=4 SV=2
tr|E2RAA0|E2RAA0_CANLF	Cysteine rich angiogenic inducer 61 OS=Canis lupus familiaris OX=9615 GN=CYR61 PE=4 SV=1
tr|F2Z4N2|F2Z4N2_CANLF	Histone H4 OS=Canis lupus familiaris OX=9615 GN=LOC111093990 PE=3 SV=1
tr|F1PXN3|F1PXN3_CANLF	Sialic acid acetylesterase OS=Canis lupus familiaris OX=9615 GN=SIAE PE=4 SV=2
sp|Q9TRY9|BGAL_CANLF	Beta-galactosidase OS=Canis lupus familiaris OX=9615 GN=GLB1 PE=1 SV=3
tr|H9GW57|H9GW57_CANLF	Uncharacterized protein OS=Canis lupus familiaris OX=9615 GN=LOC475497 PE=3 SV=2
tr|F6XLB5|F6XLB5_CANLF	Uncharacterized protein OS=Canis lupus familiaris OX=9615 PE=4 SV=1
tr|F1PP40|F1PP40_CANLF	Cysteine rich protein 2 OS=Canis lupus familiaris OX=9615 GN=CRIP2 PE=4 SV=2
tr|E2RHJ7|E2RHJ7_CANLF	Golgi reassembly stacking protein 2 OS=Canis lupus familiaris OX=9615 GN=GORASP2 PE=4 SV=1
tr|J9P4H7|J9P4H7_CANLF	CD248 molecule OS=Canis lupus familiaris OX=9615 GN=CD248 PE=4 SV=1
tr|E2RDL8|E2RDL8_CANLF	Splicing factor 3a subunit 1 OS=Canis lupus familiaris OX=9615 GN=SF3A1 PE=4 SV=1
sp|P49819|DLDH_CANLF	Dihydrolipoyl dehydrogenase, mitochondrial OS=Canis lupus familiaris OX=9615 GN=DLD PE=1 SV=1
tr|F1PU02|F1PU02_CANLF	Eukaryotic translation initiation factor 3 subunit F OS=Canis lupus familiaris OX=9615 GN=EIF3F PE=3 SV=2
tr|J9NV86|J9NV86_CANLF	Glia maturation factor beta OS=Canis lupus familiaris OX=9615 GN=GMFB PE=4 SV=1
tr|E2REA5|E2REA5_CANLF	Uncharacterized protein OS=Canis lupus familiaris OX=9615 GN=GSTA4 PE=4 SV=1
tr|F1PBK7|F1PBK7_CANLF	Uncharacterized protein OS=Canis lupus familiaris OX=9615 GN=PSMC3 PE=3 SV=2
tr|E2RH95|E2RH95_CANLF	SH3 domain-binding glutamic acid-rich-like protein OS=Canis lupus familiaris OX=9615 GN=SH3BGRL PE=3 SV=2
tr|F6UZV8|F6UZV8_CANLF	Calpain 1 OS=Canis lupus familiaris OX=9615 GN=CAPN1 PE=3 SV=1
tr|J9P7C4|J9P7C4_CANLF	Myeloid derived growth factor OS=Canis lupus familiaris OX=9615 GN=MYDGF PE=4 SV=1
tr|F1PHH3|F1PHH3_CANLF	Protein tyrosine kinase 7 (inactive) OS=Canis lupus familiaris OX=9615 GN=PTK7 PE=3 SV=1
tr|F6V659|F6V659_CANLF	DEAD-box helicase 1 OS=Canis lupus familiaris OX=9615 GN=DDX1 PE=4 SV=1
tr|J9NTD9|J9NTD9_CANLF	Histone H2B OS=Canis lupus familiaris OX=9615 PE=3 SV=1
tr|F6XH37|F6XH37_CANLF	Dipeptidyl peptidase 7 OS=Canis lupus familiaris OX=9615 GN=DPP7 PE=4 SV=1
tr|F1Q2Y7|F1Q2Y7_CANLF	Elongin B OS=Canis lupus familiaris OX=9615 GN=ELOB PE=4 SV=2
tr|J9P0P0|J9P0P0_CANLF	Uncharacterized protein OS=Canis lupus familiaris OX=9615 PE=4 SV=1
tr|J9PBL1|J9PBL1_CANLF	Hexokinase 1 OS=Canis lupus familiaris OX=9615 GN=HK1 PE=3 SV=1
tr|F1PS30|F1PS30_CANLF	alpha-1,2-Mannosidase OS=Canis lupus familiaris OX=9615 GN=MAN1A1 PE=3 SV=1
sp|Q6QNF3|PGFRB_CANLF	Platelet-derived growth factor receptor beta OS=Canis lupus familiaris OX=9615 GN=PDGFRB PE=2 SV=1
tr|E2RJZ5|E2RJZ5_CANLF	Secernin 3 OS=Canis lupus familiaris OX=9615 GN=SCRN3 PE=4 SV=2
tr|E2QXF0|E2QXF0_CANLF	Folate receptor beta OS=Canis lupus familiaris OX=9615 GN=FOLR2 PE=4 SV=1
tr|E2QY46|E2QY46_CANLF	Dicarbonyl and L-xylulose reductase OS=Canis lupus familiaris OX=9615 GN=DCXR PE=4 SV=1
tr|J9PA46|J9PA46_CANLF	DNA-(apurinic or apyrimidinic site) lyase OS=Canis lupus familiaris OX=9615 GN=APEX1 PE=3 SV=1
tr|F1PVI3|F1PVI3_CANLF	Cellular repressor of E1A stimulated genes 1 OS=Canis lupus familiaris OX=9615 GN=CREG1 PE=4 SV=2
tr|E2QUV3|E2QUV3_CANLF	Alpha 2-HS glycoprotein OS=Canis lupus familiaris OX=9615 GN=AHSG PE=4 SV=2
tr|E2QUI2|E2QUI2_CANLF	Sarcolemma associated protein OS=Canis lupus familiaris OX=9615 GN=SLMAP PE=4 SV=2
tr|F1PDB4|F1PDB4_CANLF	ATP synthase subunit beta OS=Canis lupus familiaris OX=9615 GN=ATP5F1B PE=2 SV=1
tr|E2RPC0|E2RPC0_CANLF	Ubiquilin 1 OS=Canis lupus familiaris OX=9615 GN=UBQLN1 PE=4 SV=2
tr|F6Y140|F6Y140_CANLF	KH-type splicing regulatory protein OS=Canis lupus familiaris OX=9615 GN=KHSRP PE=4 SV=1
tr|E2RA48|E2RA48_CANLF	Poly(U) binding splicing factor 60 OS=Canis lupus familiaris OX=9615 GN=PUF60 PE=4 SV=2
tr|E2QWF5|E2QWF5_CANLF	Peptidylprolyl isomerase OS=Canis lupus familiaris OX=9615 GN=FKBP4 PE=4 SV=2
tr|E2R068|E2R068_CANLF	RNA binding motif protein X-linked OS=Canis lupus familiaris OX=9615 GN=RBMX PE=4 SV=2
tr|J9JHU4|J9JHU4_CANLF	Deoxyribonuclease 2, lysosomal OS=Canis lupus familiaris OX=9615 GN=DNASE2 PE=4 SV=1
tr|E2RFV2|E2RFV2_CANLF	Tubulin beta chain OS=Canis lupus familiaris OX=9615 GN=TUBB4A PE=3 SV=2
tr|J9NWS6|J9NWS6_CANLF	AP-2 complex subunit alpha OS=Canis lupus familiaris OX=9615 GN=AP2A1 PE=3 SV=1
tr|E2RR68|E2RR68_CANLF	Family with sequence similarity 129 member B OS=Canis lupus familiaris OX=9615 GN=FAM129B PE=4 SV=1
tr|F1P7X4|F1P7X4_CANLF	Uncharacterized protein OS=Canis lupus familiaris OX=9615 PE=4 SV=2
tr|J9NZ41|J9NZ41_CANLF	Uncharacterized protein OS=Canis lupus familiaris OX=9615 PE=3 SV=1
tr|E2R9N5|E2R9N5_CANLF	Copine 1 OS=Canis lupus familiaris OX=9615 GN=CPNE1 PE=4 SV=1
tr|F1PV61|F1PV61_CANLF	Serine/threonine-protein phosphatase OS=Canis lupus familiaris OX=9615 GN=PPP5C PE=3 SV=2
tr|E2RCF2|E2RCF2_CANLF	Elastin microfibril interfacer 1 OS=Canis lupus familiaris OX=9615 GN=EMILIN1 PE=4 SV=2
tr|F6X8N0|F6X8N0_CANLF	Acidic nuclear phosphoprotein 32 family member E OS=Canis lupus familiaris OX=9615 GN=ANP32E PE=4 SV=1
tr|J9NVY4|J9NVY4_CANLF	Lysyl oxidase like 1 OS=Canis lupus familiaris OX=9615 GN=LOXL1 PE=4 SV=1
tr|J9P139|J9P139_CANLF	TSNAX-DISC1 readthrough (NMD candidate) OS=Canis lupus familiaris OX=9615 GN=TSNAX-DISC1 PE=4 SV=1
tr|J9PB14|J9PB14_CANLF	Biotinidase OS=Canis lupus familiaris OX=9615 GN=BTD PE=4 SV=1
sp|O97758|ZO1_CANLF	Tight junction protein ZO-1 OS=Canis lupus familiaris OX=9615 GN=TJP1 PE=1 SV=1
tr|F1PTC8|F1PTC8_CANLF	Cartilage acidic protein 1 OS=Canis lupus familiaris OX=9615 GN=CRTAC1 PE=4 SV=2
tr|E2R612|E2R612_CANLF	EGF containing fibulin extracellular matrix protein 1 OS=Canis lupus familiaris OX=9615 GN=EFEMP1 PE=4 SV=1
tr|E2R400|E2R400_CANLF	Semaphorin 3D OS=Canis lupus familiaris OX=9615 GN=SEMA3D PE=3 SV=2
tr|J9P9Z7|J9P9Z7_CANLF	Ribosomal protein S20 OS=Canis lupus familiaris OX=9615 GN=RPS20 PE=3 SV=1
tr|E2R1V2|E2R1V2_CANLF	Cullin 1 OS=Canis lupus familiaris OX=9615 GN=CUL1 PE=3 SV=2
tr|J9JHD9|J9JHD9_CANLF	Proteasome 26S subunit, non-ATPase 12 OS=Canis lupus familiaris OX=9615 GN=PSMD12 PE=4 SV=1
tr|F6X6A0|F6X6A0_CANLF	C-type lectin domain containing 11A OS=Canis lupus familiaris OX=9615 GN=CLEC11A PE=4 SV=1
tr|F1PFD8|F1PFD8_CANLF	Selenophosphate synthetase 1 OS=Canis lupus familiaris OX=9615 GN=SEPHS1 PE=4 SV=2
sp|Q50KA9|NDKA_CANLF	Nucleoside diphosphate kinase A OS=Canis lupus familiaris OX=9615 GN=NME1 PE=2 SV=1
tr|E2R771|E2R771_CANLF	RNA binding motif protein 3 OS=Canis lupus familiaris OX=9615 GN=RBM3 PE=4 SV=2
tr|G1K288|G1K288_CANLF	Ras-related protein Rab-2A OS=Canis lupus familiaris OX=9615 GN=RAB2A PE=4 SV=2
tr|E2RL77|E2RL77_CANLF	Tensin 1 OS=Canis lupus familiaris OX=9615 GN=TNS1 PE=4 SV=2
tr|F1PHS6|F1PHS6_CANLF	Peptidase inhibitor 16 OS=Canis lupus familiaris OX=9615 GN=PI16 PE=3 SV=2
tr|F1PQL2|F1PQL2_CANLF	Dickkopf WNT signaling pathway inhibitor 1 OS=Canis lupus familiaris OX=9615 GN=DKK1 PE=4 SV=1
tr|E2R8A2|E2R8A2_CANLF	Vacuolar protein sorting-associated protein 29 OS=Canis lupus familiaris OX=9615 GN=VPS29 PE=3 SV=2
tr|F1PZL7|F1PZL7_CANLF	Transportin 1 OS=Canis lupus familiaris OX=9615 GN=TNPO1 PE=4 SV=2
tr|E2QYN0|E2QYN0_CANLF	Tubulin folding cofactor B OS=Canis lupus familiaris OX=9615 GN=TBCB PE=4 SV=2
tr|E2R0V0|E2R0V0_CANLF	BCL2 like 13 OS=Canis lupus familiaris OX=9615 GN=BCL2L13 PE=4 SV=2
tr|E2RMT4|E2RMT4_CANLF	Actin-related protein 2/3 complex subunit OS=Canis lupus familiaris OX=9615 GN=ARPC1B PE=3 SV=1
tr|E2R6E4|E2R6E4_CANLF	DAZ associated protein 1 OS=Canis lupus familiaris OX=9615 GN=DAZAP1 PE=4 SV=1
tr|F1PLJ9|F1PLJ9_CANLF	Isoleucyl-tRNA synthetase OS=Canis lupus familiaris OX=9615 GN=IARS PE=3 SV=2
tr|F6Y016|F6Y016_CANLF	Uncharacterized protein OS=Canis lupus familiaris OX=9615 GN=SUB1 PE=4 SV=1
tr|E2RSS5|E2RSS5_CANLF	LUC7 like 3 pre-mRNA splicing factor OS=Canis lupus familiaris OX=9615 GN=LUC7L3 PE=4 SV=2
sp|Q863Z4|MTPN_CANLF	Myotrophin OS=Canis lupus familiaris OX=9615 GN=MTPN PE=3 SV=3
tr|E2QRT0|E2QRT0_CANLF	Heterogeneous nuclear ribonucleoprotein D like OS=Canis lupus familiaris OX=9615 GN=HNRNPDL PE=4 SV=1
tr|F1PK43|F1PK43_CANLF	Aldo-keto reductase family 1 member A1 OS=Canis lupus familiaris OX=9615 GN=AKR1A1 PE=4 SV=2
tr|F1PQV4|F1PQV4_CANLF	Olfactomedin like 3 OS=Canis lupus familiaris OX=9615 GN=OLFML3 PE=4 SV=2
tr|J9P4J0|J9P4J0_CANLF	Nardilysin convertase OS=Canis lupus familiaris OX=9615 GN=NRDC PE=3 SV=1
tr|F6Y5M8|F6Y5M8_CANLF	Uncharacterized protein OS=Canis lupus familiaris OX=9615 GN=LOC100856725 PE=4 SV=1
sp|Q5TJE9|RS18_CANLF	40S ribosomal protein S18 OS=Canis lupus familiaris OX=9615 GN=RPS18 PE=1 SV=3
tr|E2QWD0|E2QWD0_CANLF	CAP-Gly domain containing linker protein 1 OS=Canis lupus familiaris OX=9615 GN=CLIP1 PE=4 SV=2
tr|A0FGS8|A0FGS8_CANLF	Anionic trypsinogen (Fragment) OS=Canis lupus familiaris OX=9615 PE=3 SV=1
tr|F1PUT4|F1PUT4_CANLF	Basic leucine zipper and W2 domains 2 OS=Canis lupus familiaris OX=9615 GN=BZW2 PE=4 SV=2
tr|E2RNQ8|E2RNQ8_CANLF	Aspartyl-tRNA synthetase OS=Canis lupus familiaris OX=9615 GN=DARS PE=3 SV=1
tr|J9P1H9|J9P1H9_CANLF	Thioredoxin domain containing 12 OS=Canis lupus familiaris OX=9615 GN=TXNDC12 PE=4 SV=1
tr|F1Q139|F1Q139_CANLF	Phosphatidylinositol transfer protein alpha OS=Canis lupus familiaris OX=9615 GN=PITPNA PE=4 SV=2
tr|E2R2F2|E2R2F2_CANLF	Endothelial differentiation related factor 1 OS=Canis lupus familiaris OX=9615 GN=EDF1 PE=4 SV=1
tr|L7MTN8|L7MTN8_CANLF	Uncharacterized protein OS=Canis lupus familiaris OX=9615 GN=ITSN1 PE=4 SV=1
tr|F1PX57|F1PX57_CANLF	26S proteasome non-ATPase regulatory subunit 1 OS=Canis lupus familiaris OX=9615 GN=PSMD1 PE=3 SV=2
tr|E2R1P9|E2R1P9_CANLF	Methionine aminopeptidase 2 OS=Canis lupus familiaris OX=9615 GN=METAP2 PE=3 SV=2
tr|E2RE36|E2RE36_CANLF	Heterogeneous nuclear ribonucleoprotein R OS=Canis lupus familiaris OX=9615 GN=HNRNPR PE=4 SV=2
tr|E2R837|E2R837_CANLF	Ubiquitin like modifier activating enzyme 2 OS=Canis lupus familiaris OX=9615 GN=UBA2 PE=4 SV=2
tr|E2R1C4|E2R1C4_CANLF	Small nuclear ribonucleoprotein-associated protein OS=Canis lupus familiaris OX=9615 GN=SNRPB PE=3 SV=2
tr|E2QW54|E2QW54_CANLF	LIM domain and actin binding 1 OS=Canis lupus familiaris OX=9615 GN=LIMA1 PE=4 SV=2
tr|E2R0S8|E2R0S8_CANLF	G1 to S phase transition 1 OS=Canis lupus familiaris OX=9615 GN=GSPT1 PE=4 SV=2
tr|F6XFY9|F6XFY9_CANLF	Protein arginine methyltransferase 1 OS=Canis lupus familiaris OX=9615 GN=PRMT1 PE=3 SV=1
tr|F1PFG6|F1PFG6_CANLF	Programmed cell death 6 interacting protein OS=Canis lupus familiaris OX=9615 GN=PDCD6IP PE=4 SV=2
tr|J9NZJ6|J9NZJ6_CANLF	Phosphatidylinositol binding clathrin assembly protein OS=Canis lupus familiaris OX=9615 GN=PICALM PE=4 SV=1
tr|F1PFZ5|F1PFZ5_CANLF	Milk fat globule-EGF factor 8 protein OS=Canis lupus familiaris OX=9615 GN=MFGE8 PE=4 SV=2
tr|F1PMS0|F1PMS0_CANLF	Uncharacterized protein OS=Canis lupus familiaris OX=9615 GN=LRRFIP1 PE=4 SV=2
tr|E2R297|E2R297_CANLF	Uncharacterized protein OS=Canis lupus familiaris OX=9615 GN=LOC102152612 PE=4 SV=1
tr|F1Q1H3|F1Q1H3_CANLF	Programmed cell death 6 OS=Canis lupus familiaris OX=9615 GN=PDCD6 PE=4 SV=2
tr|J9NUJ7|J9NUJ7_CANLF	Uncharacterized protein OS=Canis lupus familiaris OX=9615 GN=LOC477558 PE=3 SV=1
tr|J9NY67|J9NY67_CANLF	Uncharacterized protein OS=Canis lupus familiaris OX=9615 PE=3 SV=1
tr|F6XGA3|F6XGA3_CANLF	Jupiter microtubule associated homolog 2 OS=Canis lupus familiaris OX=9615 GN=JPT2 PE=4 SV=1
tr|H9GW88|H9GW88_CANLF	Uncharacterized protein OS=Canis lupus familiaris OX=9615 GN=GATD1 PE=4 SV=2
tr|E2RRW0|E2RRW0_CANLF	Uncharacterized protein OS=Canis lupus familiaris OX=9615 GN=SKP1 PE=3 SV=1
tr|F1P9I9|F1P9I9_CANLF	Carboxypeptidase OS=Canis lupus familiaris OX=9615 GN=CTSA PE=3 SV=1
tr|F6XQ20|F6XQ20_CANLF	Uncharacterized protein OS=Canis lupus familiaris OX=9615 GN=FARSB PE=4 SV=1
tr|E2R8W7|E2R8W7_CANLF	Calcium binding protein 39 OS=Canis lupus familiaris OX=9615 GN=CAB39 PE=4 SV=1
tr|E2QXD6|E2QXD6_CANLF	Glyoxalase domain containing 4 OS=Canis lupus familiaris OX=9615 GN=GLOD4 PE=4 SV=2
tr|F1PUT6|F1PUT6_CANLF	Paxillin OS=Canis lupus familiaris OX=9615 GN=PXN PE=4 SV=1
tr|J9P3R6|J9P3R6_CANLF	Retinoic acid induced 14 OS=Canis lupus familiaris OX=9615 GN=RAI14 PE=4 SV=1
tr|F1PPT7|F1PPT7_CANLF	Uncharacterized protein OS=Canis lupus familiaris OX=9615 GN=PAICS PE=3 SV=2
tr|J9P0L7|J9P0L7_CANLF	Serine/threonine-protein phosphatase 2A 55 kDa regulatory subunit B OS=Canis lupus familiaris OX=9615 GN=PPP2R2A PE=3 SV=1
tr|F6V5G7|F6V5G7_CANLF	Small nuclear ribonucleoprotein U1 subunit 70 OS=Canis lupus familiaris OX=9615 GN=SNRNP70 PE=4 SV=1
tr|F1P926|F1P926_CANLF	Farnesyl diphosphate synthase OS=Canis lupus familiaris OX=9615 GN=FDPS PE=3 SV=2
tr|E2RFV7|E2RFV7_CANLF	Heterogeneous nuclear ribonucleoprotein A3 OS=Canis lupus familiaris OX=9615 GN=HNRNPA3 PE=4 SV=2
tr|J9P6J3|J9P6J3_CANLF	Heterogeneous nuclear ribonucleoprotein U OS=Canis lupus familiaris OX=9615 GN=HNRNPU PE=4 SV=1
tr|J9NSU9|J9NSU9_CANLF	Proteasome 26S subunit, non-ATPase 9 OS=Canis lupus familiaris OX=9615 GN=PSMD9 PE=4 SV=1
tr|F1PTP3|F1PTP3_CANLF	Non-POU domain containing octamer binding OS=Canis lupus familiaris OX=9615 GN=NONO PE=4 SV=2
tr|E2RPS7|E2RPS7_CANLF	Rap1 GTPase-GDP dissociation stimulator 1 OS=Canis lupus familiaris OX=9615 GN=RAP1GDS1 PE=4 SV=2
tr|F1PWZ7|F1PWZ7_CANLF	Doublecortin like kinase 1 OS=Canis lupus familiaris OX=9615 GN=DCLK1 PE=4 SV=2
tr|E2RQL8|E2RQL8_CANLF	Diphthamide biosynthesis 5 OS=Canis lupus familiaris OX=9615 GN=DPH5 PE=3 SV=1
tr|F6XUT8|F6XUT8_CANLF	ELKS/RAB6-interacting/CAST family member 1 OS=Canis lupus familiaris OX=9615 GN=ERC1 PE=4 SV=1
tr|F1PBI2|F1PBI2_CANLF	Dimethylarginine dimethylaminohydrolase 2 OS=Canis lupus familiaris OX=9615 GN=DDAH2 PE=4 SV=2
tr|F6XNH4|F6XNH4_CANLF	Methylenetetrahydrofolate dehydrogenase, cyclohydrolase and formyltetrahydrofolate synthetase 1 OS=Canis lupus familiaris OX=9615 GN=MTHFD1 PE=3 SV=1
tr|F1PER7|F1PER7_CANLF	Spectrin repeat containing nuclear envelope protein 1 OS=Canis lupus familiaris OX=9615 GN=SYNE1 PE=4 SV=2
sp|P60952|CDC42_CANLF	Cell division control protein 42 homolog OS=Canis lupus familiaris OX=9615 GN=CDC42 PE=2 SV=2
tr|E2R5M7|E2R5M7_CANLF	Thioredoxin like 1 OS=Canis lupus familiaris OX=9615 GN=TXNL1 PE=4 SV=2
tr|F1PIK5|F1PIK5_CANLF	Proliferation and apoptosis adaptor protein 15 OS=Canis lupus familiaris OX=9615 GN=PEA15 PE=4 SV=1
tr|E2RC23|E2RC23_CANLF	Procollagen C-endopeptidase enhancer OS=Canis lupus familiaris OX=9615 GN=PCOLCE PE=4 SV=1
tr|E2R158|E2R158_CANLF	Protein phosphatase, Mg2+/Mn2+ dependent 1A OS=Canis lupus familiaris OX=9615 GN=PPM1A PE=3 SV=2
tr|E2R2A4|E2R2A4_CANLF	Purine rich element binding protein A OS=Canis lupus familiaris OX=9615 GN=PURA PE=4 SV=2
tr|F1PPH7|F1PPH7_CANLF	Proteasome 26S subunit, ATPase 2 OS=Canis lupus familiaris OX=9615 GN=PSMC2 PE=3 SV=2
tr|F1PHE6|F1PHE6_CANLF	Prefoldin subunit 4 OS=Canis lupus familiaris OX=9615 PE=3 SV=2
tr|J9P687|J9P687_CANLF	Aldose 1-epimerase OS=Canis lupus familiaris OX=9615 GN=GALM PE=3 SV=1
tr|F1Q1E1|F1Q1E1_CANLF	Lamin B2 OS=Canis lupus familiaris OX=9615 GN=LMNB2 PE=3 SV=2
tr|E2RG21|E2RG21_CANLF	High mobility group nucleosome binding domain 1 OS=Canis lupus familiaris OX=9615 GN=HMGN1 PE=4 SV=2
tr|F6XCS5|F6XCS5_CANLF	BCL2 associated transcription factor 1 OS=Canis lupus familiaris OX=9615 GN=BCLAF1 PE=4 SV=1
tr|F6XLF1|F6XLF1_CANLF	Matrix remodeling associated 5 OS=Canis lupus familiaris OX=9615 GN=MXRA5 PE=4 SV=1
tr|F1PG65|F1PG65_CANLF	LIM domain 7 OS=Canis lupus familiaris OX=9615 GN=LMO7 PE=4 SV=2
tr|J9P1R0|J9P1R0_CANLF	Epidermal growth factor receptor pathway substrate 8 OS=Canis lupus familiaris OX=9615 GN=EPS8 PE=4 SV=1
tr|E2RSR4|E2RSR4_CANLF	Uncharacterized protein OS=Canis lupus familiaris OX=9615 GN=PBDC1 PE=4 SV=2
tr|E2R9K5|E2R9K5_CANLF	Uncharacterized protein OS=Canis lupus familiaris OX=9615 GN=GGCT PE=4 SV=1
tr|F1Q459|F1Q459_CANLF	Carboxypeptidase E OS=Canis lupus familiaris OX=9615 GN=CPE PE=4 SV=1
tr|E2R0D2|E2R0D2_CANLF	Scavenger receptor cysteine rich family member with 5 domains OS=Canis lupus familiaris OX=9615 GN=SSC5D PE=4 SV=2
tr|E2RSJ0|E2RSJ0_CANLF	AP complex subunit sigma OS=Canis lupus familiaris OX=9615 GN=AP2S1 PE=3 SV=1
tr|E2RF98|E2RF98_CANLF	CRK like proto-oncogene, adaptor protein OS=Canis lupus familiaris OX=9615 GN=CRKL PE=4 SV=2
tr|E2QZV5|E2QZV5_CANLF	Protein kinase cAMP-dependent type I regulatory subunit alpha OS=Canis lupus familiaris OX=9615 GN=PRKAR1A PE=4 SV=1
tr|F1PKS1|F1PKS1_CANLF	ATP-dependent 6-phosphofructokinase OS=Canis lupus familiaris OX=9615 GN=PFKP PE=3 SV=2
tr|E2QVG7|E2QVG7_CANLF	Uncharacterized protein OS=Canis lupus familiaris OX=9615 PE=4 SV=1
tr|J9NUZ6|J9NUZ6_CANLF	Peptidyl-prolyl cis-trans isomerase OS=Canis lupus familiaris OX=9615 GN=PPIC PE=3 SV=1
tr|E2RRJ3|E2RRJ3_CANLF	Ubiquitin associated protein 2 like OS=Canis lupus familiaris OX=9615 GN=UBAP2L PE=4 SV=2
tr|F1PE53|F1PE53_CANLF	Rho associated coiled-coil containing protein kinase 2 OS=Canis lupus familiaris OX=9615 GN=ROCK2 PE=3 SV=2
tr|F1PI06|F1PI06_CANLF	Aldehyde dehydrogenase family 16 member A1 OS=Canis lupus familiaris OX=9615 GN=ALDH16A1 PE=3 SV=2
tr|F1PLM5|F1PLM5_CANLF	S-(hydroxymethyl)glutathione dehydrogenase OS=Canis lupus familiaris OX=9615 GN=ADH5 PE=3 SV=2
tr|E2RF39|E2RF39_CANLF	Phosducin like 3 OS=Canis lupus familiaris OX=9615 GN=PDCL3 PE=4 SV=1
tr|E2RSW0|E2RSW0_CANLF	Cytoskeleton associated protein 5 OS=Canis lupus familiaris OX=9615 GN=CKAP5 PE=4 SV=2
tr|F1PGZ1|F1PGZ1_CANLF	Beta-1,4-galactosyltransferase 1 OS=Canis lupus familiaris OX=9615 GN=B4GALT1 PE=4 SV=2
tr|F1PE38|F1PE38_CANLF	Cadherin 13 OS=Canis lupus familiaris OX=9615 GN=CDH13 PE=4 SV=2
tr|E2RAH4|E2RAH4_CANLF	Tropomyosin 2 OS=Canis lupus familiaris OX=9615 GN=TPM2 PE=2 SV=2
tr|J9NV14|J9NV14_CANLF	Parvin alpha OS=Canis lupus familiaris OX=9615 GN=PARVA PE=4 SV=1
tr|J9PB22|J9PB22_CANLF	Histone H3 OS=Canis lupus familiaris OX=9615 GN=LOC111093988 PE=3 SV=1
tr|E2RH29|E2RH29_CANLF	Protein transport protein SEC23 OS=Canis lupus familiaris OX=9615 GN=SEC23B PE=3 SV=1
tr|F1PJ63|F1PJ63_CANLF	Bridging integrator 1 OS=Canis lupus familiaris OX=9615 GN=BIN1 PE=4 SV=2
tr|E2REJ7|E2REJ7_CANLF	PC4 and SFRS1 interacting protein 1 OS=Canis lupus familiaris OX=9615 GN=PSIP1 PE=4 SV=2
tr|F1PQ10|F1PQ10_CANLF	Integral membrane protein 2B OS=Canis lupus familiaris OX=9615 GN=ITM2B PE=4 SV=2
tr|E2QUQ8|E2QUQ8_CANLF	YTH N6-methyladenosine RNA binding protein 3 OS=Canis lupus familiaris OX=9615 GN=YTHDF3 PE=4 SV=2
tr|F6XIB7|F6XIB7_CANLF	Uncharacterized protein OS=Canis lupus familiaris OX=9615 GN=CNPY2 PE=4 SV=1
tr|F1PPR0|F1PPR0_CANLF	Eukaryotic translation initiation factor 3 subunit I OS=Canis lupus familiaris OX=9615 GN=EIF3I PE=3 SV=1
tr|E2RLW5|E2RLW5_CANLF	Uncharacterized protein OS=Canis lupus familiaris OX=9615 GN=CCDC124 PE=4 SV=1
tr|J9P8G4|J9P8G4_CANLF	CutA divalent cation tolerance homolog OS=Canis lupus familiaris OX=9615 GN=CUTA PE=4 SV=1
tr|E2RJS5|E2RJS5_CANLF	Nexilin F-actin binding protein OS=Canis lupus familiaris OX=9615 GN=NEXN PE=4 SV=2
tr|E2RK77|E2RK77_CANLF	Tumor protein D52 like 2 OS=Canis lupus familiaris OX=9615 GN=TPD52L2 PE=4 SV=2
tr|F1P996|F1P996_CANLF	G protein pathway suppressor 1 OS=Canis lupus familiaris OX=9615 GN=GPS1 PE=4 SV=2
tr|F6X958|F6X958_CANLF	Serine/threonine-protein phosphatase OS=Canis lupus familiaris OX=9615 GN=PPP2CB PE=3 SV=1
tr|E2RJ14|E2RJ14_CANLF	Neuropilin OS=Canis lupus familiaris OX=9615 GN=NRP2 PE=3 SV=2
tr|J9P6S0|J9P6S0_CANLF	40S ribosomal protein S3a OS=Canis lupus familiaris OX=9615 GN=RPS3A PE=3 SV=1
tr|F1P9W2|F1P9W2_CANLF	Calponin OS=Canis lupus familiaris OX=9615 GN=CNN3 PE=3 SV=1
tr|J9P2S9|J9P2S9_CANLF	N(alpha)-acetyltransferase 20, NatB catalytic subunit OS=Canis lupus familiaris OX=9615 GN=NAA20 PE=4 SV=1
tr|E2RF52|E2RF52_CANLF	Proteasome subunit alpha type OS=Canis lupus familiaris OX=9615 GN=PSMA8 PE=3 SV=2
tr|J9NZ28|J9NZ28_CANLF	Ran GTPase activating protein 1 OS=Canis lupus familiaris OX=9615 GN=RANGAP1 PE=4 SV=1
tr|F1PS41|F1PS41_CANLF	Importin 9 OS=Canis lupus familiaris OX=9615 GN=IPO9 PE=4 SV=2
tr|F1PVL7|F1PVL7_CANLF	Protein O-fucosyltransferase 1 OS=Canis lupus familiaris OX=9615 GN=POFUT1 PE=4 SV=1
tr|E2QV97|E2QV97_CANLF	Asparaginyl-tRNA synthetase OS=Canis lupus familiaris OX=9615 GN=NARS PE=4 SV=1
tr|F1PNH6|F1PNH6_CANLF	Selenium binding protein 1 OS=Canis lupus familiaris OX=9615 GN=SELENBP1 PE=4 SV=2
tr|J9P7R9|J9P7R9_CANLF	Uncharacterized protein OS=Canis lupus familiaris OX=9615 PE=4 SV=1
tr|E2RAI8|E2RAI8_CANLF	Oxidative stress responsive 1 OS=Canis lupus familiaris OX=9615 GN=OXSR1 PE=4 SV=2
tr|E2RPJ4|E2RPJ4_CANLF	Glutamate-cysteine ligase catalytic subunit OS=Canis lupus familiaris OX=9615 GN=GCLC PE=4 SV=2
tr|E2RAU5|E2RAU5_CANLF	Stress-70 protein, mitochondrial OS=Canis lupus familiaris OX=9615 GN=HSPA9 PE=3 SV=1
sp|Q00004|SRP68_CANLF	Signal recognition particle subunit SRP68 OS=Canis lupus familiaris OX=9615 GN=SRP68 PE=1 SV=1
tr|E2REU8|E2REU8_CANLF	FERM, ARH/RhoGEF and pleckstrin domain protein 1 OS=Canis lupus familiaris OX=9615 GN=FARP1 PE=4 SV=2
tr|E2REI7|E2REI7_CANLF	Nuclear receptor binding protein 1 (Fragment) OS=Canis lupus familiaris OX=9615 GN=NRBP1 PE=4 SV=1
tr|E2R3B5|E2R3B5_CANLF	Dpy-30, histone methyltransferase complex regulatory subunit OS=Canis lupus familiaris OX=9615 GN=DPY30 PE=4 SV=1
tr|E2RA07|E2RA07_CANLF	EWS RNA binding protein 1 OS=Canis lupus familiaris OX=9615 GN=EWSR1 PE=4 SV=2
tr|J9NZ14|J9NZ14_CANLF	Uncharacterized protein OS=Canis lupus familiaris OX=9615 GN=LOC477430 PE=4 SV=1
tr|F1PAR9|F1PAR9_CANLF	NPC intracellular cholesterol transporter 2 OS=Canis lupus familiaris OX=9615 GN=NPC2 PE=4 SV=2
tr|J9NU25|J9NU25_CANLF	Heat shock protein family A (Hsp70) member 13 OS=Canis lupus familiaris OX=9615 GN=HSPA13 PE=3 SV=1
tr|F1PG39|F1PG39_CANLF	Inter-alpha-trypsin inhibitor heavy chain 2 OS=Canis lupus familiaris OX=9615 GN=ITIH2 PE=4 SV=2
tr|J9NXQ0|J9NXQ0_CANLF	Prolyl 3-hydroxylase 3 OS=Canis lupus familiaris OX=9615 GN=P3H3 PE=4 SV=1
tr|E2RTJ0|E2RTJ0_CANLF	Anamorsin OS=Canis lupus familiaris OX=9615 GN=CIAPIN1 PE=3 SV=2
tr|E2RB90|E2RB90_CANLF	Heterogeneous nuclear ribonucleoprotein F OS=Canis lupus familiaris OX=9615 GN=HNRNPF PE=4 SV=1
tr|F1PS82|F1PS82_CANLF	Fructose-bisphosphate aldolase OS=Canis lupus familiaris OX=9615 GN=ALDOC PE=3 SV=2
tr|E2RF73|E2RF73_CANLF	DNA helicase OS=Canis lupus familiaris OX=9615 GN=MCM3 PE=3 SV=2
tr|E2RF16|E2RF16_CANLF	5'-nucleotidase, cytosolic II OS=Canis lupus familiaris OX=9615 GN=NT5C2 PE=4 SV=2
tr|H9GWD1|H9GWD1_CANLF	Meteorin like, glial cell differentiation regulator OS=Canis lupus familiaris OX=9615 GN=METRNL PE=4 SV=2
tr|F1PKN7|F1PKN7_CANLF	Acetylserotonin O-methyltransferase like OS=Canis lupus familiaris OX=9615 GN=ASMTL PE=4 SV=2
tr|E2QWE0|E2QWE0_CANLF	COP9 signalosome subunit 5 OS=Canis lupus familiaris OX=9615 GN=COPS5 PE=4 SV=1
tr|F1Q1B1|F1Q1B1_CANLF	LSM7 homolog, U6 small nuclear RNA and mRNA degradation associated OS=Canis lupus familiaris OX=9615 GN=LSM7 PE=4 SV=2
tr|E2QWM9|E2QWM9_CANLF	Ubiquitin carboxyl-terminal hydrolase OS=Canis lupus familiaris OX=9615 GN=UCHL5 PE=3 SV=1
tr|E2QWR3|E2QWR3_CANLF	Regulator of chromosome condensation 2 OS=Canis lupus familiaris OX=9615 GN=RCC2 PE=4 SV=2
tr|F1PEX0|F1PEX0_CANLF	Coiled-coil and C2 domain containing 1B OS=Canis lupus familiaris OX=9615 GN=CC2D1B PE=4 SV=2
tr|F1PTP2|F1PTP2_CANLF	Sepiapterin reductase OS=Canis lupus familiaris OX=9615 GN=SPR PE=4 SV=2
tr|E2RPD7|E2RPD7_CANLF	CCHC-type zinc finger nucleic acid binding protein OS=Canis lupus familiaris OX=9615 GN=CNBP PE=4 SV=2
tr|E2R7E8|E2R7E8_CANLF	Acylaminoacyl-peptide hydrolase OS=Canis lupus familiaris OX=9615 GN=APEH PE=4 SV=1
tr|J9NTM8|J9NTM8_CANLF	Uncharacterized protein OS=Canis lupus familiaris OX=9615 GN=AKAP2 PE=4 SV=1
tr|J9NRP4|J9NRP4_CANLF	Cleavage and polyadenylation specific factor 6 OS=Canis lupus familiaris OX=9615 GN=CPSF6 PE=4 SV=1
tr|J9P8U8|J9P8U8_CANLF	RWD domain containing 1 OS=Canis lupus familiaris OX=9615 GN=RWDD1 PE=4 SV=1
tr|F1PX83|F1PX83_CANLF	Ubiquitin specific peptidase 7 OS=Canis lupus familiaris OX=9615 GN=USP7 PE=3 SV=2
tr|E2RBC1|E2RBC1_CANLF	Dynactin subunit 3 OS=Canis lupus familiaris OX=9615 GN=DCTN3 PE=4 SV=1
tr|E2RQ80|E2RQ80_CANLF	Small nuclear ribonucleoprotein Sm D3 OS=Canis lupus familiaris OX=9615 GN=SNRPD3 PE=3 SV=1
tr|E2R2P0|E2R2P0_CANLF	Nucleoporin 62 OS=Canis lupus familiaris OX=9615 GN=NUP62 PE=4 SV=1
tr|J9P2X4|J9P2X4_CANLF	Uncharacterized protein OS=Canis lupus familiaris OX=9615 PE=4 SV=1
tr|E2RM60|E2RM60_CANLF	Ubiquitin-fold modifier-conjugating enzyme 1 OS=Canis lupus familiaris OX=9615 GN=UFC1 PE=3 SV=1
tr|E2QXJ7|E2QXJ7_CANLF	PPFIA binding protein 1 OS=Canis lupus familiaris OX=9615 GN=PPFIBP1 PE=4 SV=1
tr|F1PS57|F1PS57_CANLF	Prolyl 3-hydroxylase 1 OS=Canis lupus familiaris OX=9615 GN=P3H1 PE=4 SV=2
tr|F1PN67|F1PN67_CANLF	Microtubule associated protein 1S OS=Canis lupus familiaris OX=9615 GN=MAP1S PE=4 SV=2
tr|E2RCY1|E2RCY1_CANLF	Family with sequence similarity 49 member B OS=Canis lupus familiaris OX=9615 GN=FAM49B PE=4 SV=1
tr|F1PHW5|F1PHW5_CANLF	Prolyl endopeptidase OS=Canis lupus familiaris OX=9615 GN=PREP PE=4 SV=2
tr|J9P9X3|J9P9X3_CANLF	Kinesin-like protein OS=Canis lupus familiaris OX=9615 GN=KIF2A PE=3 SV=1
tr|E2QYD0|E2QYD0_CANLF	Phospholysine phosphohistidine inorganic pyrophosphate phosphatase OS=Canis lupus familiaris OX=9615 GN=LHPP PE=4 SV=2
tr|F1PB28|F1PB28_CANLF	ZPR1 zinc finger OS=Canis lupus familiaris OX=9615 GN=ZPR1 PE=4 SV=2
tr|F1PZE5|F1PZE5_CANLF	Diaphanous related formin 1 OS=Canis lupus familiaris OX=9615 GN=DIAPH1 PE=4 SV=2
tr|E2RS79|E2RS79_CANLF	Uncharacterized protein OS=Canis lupus familiaris OX=9615 GN=CFB PE=3 SV=2
tr|F6XJB3|F6XJB3_CANLF	Haloacid dehalogenase like hydrolase domain containing 2 OS=Canis lupus familiaris OX=9615 GN=HDHD2 PE=4 SV=1
tr|A0A0A0MPD2|A0A0A0MPD2_CANLF	Ribosomal protein L19 OS=Canis lupus familiaris OX=9615 GN=RPL19 PE=3 SV=1
tr|J9P211|J9P211_CANLF	Hippocalcin like 1 OS=Canis lupus familiaris OX=9615 GN=HPCAL1 PE=4 SV=1
tr|F1PEA6|F1PEA6_CANLF	DEAD-box helicase 5 OS=Canis lupus familiaris OX=9615 GN=DDX5 PE=3 SV=2
tr|F1PQQ3|F1PQQ3_CANLF	Hook microtubule tethering protein 3 OS=Canis lupus familiaris OX=9615 GN=HOOK3 PE=4 SV=2
tr|F1PU24|F1PU24_CANLF	Inverted formin, FH2 and WH2 domain containing OS=Canis lupus familiaris OX=9615 GN=INF2 PE=4 SV=2
tr|F1PZA0|F1PZA0_CANLF	Delta-aminolevulinic acid dehydratase OS=Canis lupus familiaris OX=9615 GN=ALAD PE=3 SV=1
tr|E2R1K2|E2R1K2_CANLF	RAB, member RAS oncogene family like 6 OS=Canis lupus familiaris OX=9615 GN=RABL6 PE=4 SV=1
tr|H9GWT9|H9GWT9_CANLF	Uncharacterized protein OS=Canis lupus familiaris OX=9615 PE=4 SV=2
tr|F1PER9|F1PER9_CANLF	Formin binding protein 1 OS=Canis lupus familiaris OX=9615 GN=FNBP1 PE=4 SV=2
tr|J9P1A8|J9P1A8_CANLF	Phospholipase A2 activating protein OS=Canis lupus familiaris OX=9615 GN=PLAA PE=4 SV=1
tr|E2R990|E2R990_CANLF	CCR4-NOT transcription complex subunit 1 OS=Canis lupus familiaris OX=9615 GN=CNOT1 PE=4 SV=2
tr|J9P9Z6|J9P9Z6_CANLF	Growth factor receptor bound protein 2 OS=Canis lupus familiaris OX=9615 GN=GRB2 PE=4 SV=1
tr|F1PRU1|F1PRU1_CANLF	Echinoderm microtubule associated protein like 2 OS=Canis lupus familiaris OX=9615 GN=EML2 PE=4 SV=2
tr|J9NZ79|J9NZ79_CANLF	Syndecan 4 OS=Canis lupus familiaris OX=9615 GN=SDC4 PE=4 SV=1
tr|J9NXE0|J9NXE0_CANLF	Microfibril associated protein 5 OS=Canis lupus familiaris OX=9615 GN=MFAP5 PE=4 SV=1
tr|J9P7Y8|J9P7Y8_CANLF	Uncharacterized protein OS=Canis lupus familiaris OX=9615 PE=3 SV=1
tr|F1PB77|F1PB77_CANLF	Alpha-1,4 glucan phosphorylase OS=Canis lupus familiaris OX=9615 GN=PYGL PE=3 SV=2
tr|E2RJ60|E2RJ60_CANLF	DEAD-box helicase 17 OS=Canis lupus familiaris OX=9615 GN=DDX17 PE=3 SV=2
tr|E2RT85|E2RT85_CANLF	Collagen type XIV alpha 1 chain OS=Canis lupus familiaris OX=9615 GN=COL14A1 PE=4 SV=2
tr|F1Q0B2|F1Q0B2_CANLF	MOB kinase activator 1B OS=Canis lupus familiaris OX=9615 GN=MOB1B PE=4 SV=2
tr|J9NVL7|J9NVL7_CANLF	Aldehyde dehydrogenase 7 family member A1 OS=Canis lupus familiaris OX=9615 GN=ALDH7A1 PE=3 SV=1
tr|E2R4L7|E2R4L7_CANLF	Serine hydroxymethyltransferase OS=Canis lupus familiaris OX=9615 GN=SHMT2 PE=3 SV=2
tr|Q06SM4|Q06SM4_CANLF	Pinin 2 OS=Canis lupus familiaris OX=9615 PE=4 SV=1
tr|E2RRB7|E2RRB7_CANLF	VAMP associated protein B and C OS=Canis lupus familiaris OX=9615 GN=VAPB PE=4 SV=1
tr|F1PGG9|F1PGG9_CANLF	Cyclin G associated kinase OS=Canis lupus familiaris OX=9615 GN=GAK PE=4 SV=2
tr|E2RLP1|E2RLP1_CANLF	Actin related protein 10 homolog OS=Canis lupus familiaris OX=9615 GN=ACTR10 PE=3 SV=2
tr|F1Q4B4|F1Q4B4_CANLF	5', 3'-nucleotidase, cytosolic OS=Canis lupus familiaris OX=9615 GN=NT5C PE=4 SV=1
tr|F6UXL3|F6UXL3_CANLF	ADAM metallopeptidase domain 15 OS=Canis lupus familiaris OX=9615 GN=ADAM15 PE=4 SV=1
tr|F6UMY5|F6UMY5_CANLF	Immunoglobulin binding protein 1 OS=Canis lupus familiaris OX=9615 GN=IGBP1 PE=4 SV=1
tr|J9NYC0|J9NYC0_CANLF	Microfibril associated protein 4 OS=Canis lupus familiaris OX=9615 GN=MFAP4 PE=4 SV=1
tr|F1PF82|F1PF82_CANLF	Spermine synthase OS=Canis lupus familiaris OX=9615 GN=SMS PE=4 SV=1
tr|F1PI20|F1PI20_CANLF	Exosome component 10 OS=Canis lupus familiaris OX=9615 GN=EXOSC10 PE=4 SV=2
tr|J9NSZ7|J9NSZ7_CANLF	Myelin protein zero like 1 OS=Canis lupus familiaris OX=9615 GN=MPZL1 PE=4 SV=1
tr|J9P0J7|J9P0J7_CANLF	ERH, mRNA splicing and mitosis factor OS=Canis lupus familiaris OX=9615 GN=ERH PE=4 SV=1
tr|F1PIS7|F1PIS7_CANLF	Transcription factor BTF3 OS=Canis lupus familiaris OX=9615 GN=BTF3 PE=3 SV=1
tr|F1PDY2|F1PDY2_CANLF	Coatomer protein complex subunit zeta 2 OS=Canis lupus familiaris OX=9615 GN=COPZ2 PE=4 SV=1
tr|E2RD79|E2RD79_CANLF	DNA helicase OS=Canis lupus familiaris OX=9615 GN=MCM6 PE=3 SV=1
tr|E2QUY7|E2QUY7_CANLF	Proteasome 26S subunit, non-ATPase 3 OS=Canis lupus familiaris OX=9615 GN=PSMD3 PE=4 SV=2
tr|E2QX33|E2QX33_CANLF	Coiled-coil and C2 domain containing 1A OS=Canis lupus familiaris OX=9615 GN=CC2D1A PE=4 SV=1
tr|E2QU31|E2QU31_CANLF	Phenylalanyl-tRNA synthetase subunit alpha OS=Canis lupus familiaris OX=9615 GN=FARSA PE=4 SV=1
tr|Q3HTT4|Q3HTT4_CANLF	Endothelin converting enzyme-1 (Fragment) OS=Canis lupus familiaris OX=9615 PE=2 SV=1
tr|E2QU53|E2QU53_CANLF	NOP56 ribonucleoprotein OS=Canis lupus familiaris OX=9615 GN=NOP56 PE=4 SV=1
tr|F1PX39|F1PX39_CANLF	HD domain containing 2 OS=Canis lupus familiaris OX=9615 GN=HDDC2 PE=4 SV=1
tr|F1Q1H5|F1Q1H5_CANLF	Spermatogenesis associated serine rich 2 like OS=Canis lupus familiaris OX=9615 GN=SPATS2L PE=4 SV=2
tr|F1PY05|F1PY05_CANLF	Integrin subunit alpha 5 OS=Canis lupus familiaris OX=9615 GN=ITGA5 PE=3 SV=2
tr|F1Q2U8|F1Q2U8_CANLF	Fragile X mental retardation 1 OS=Canis lupus familiaris OX=9615 GN=FMR1 PE=4 SV=2
tr|E2RN00|E2RN00_CANLF	Proteasome 26S subunit, non-ATPase 6 OS=Canis lupus familiaris OX=9615 GN=PSMD6 PE=4 SV=2
tr|E2RR46|E2RR46_CANLF	Aminopeptidase like 1 OS=Canis lupus familiaris OX=9615 GN=NPEPL1 PE=4 SV=1
tr|F1P7Z9|F1P7Z9_CANLF	Phosphoinositide phospholipase C OS=Canis lupus familiaris OX=9615 GN=PLCD1 PE=4 SV=2
sp|E2QUI9|NNRD_CANLF	ATP-dependent (S)-NAD(P)H-hydrate dehydratase OS=Canis lupus familiaris OX=9615 GN=NAXD PE=3 SV=1
tr|E2RBV0|E2RBV0_CANLF	WD repeat domain 61 OS=Canis lupus familiaris OX=9615 GN=WDR61 PE=4 SV=1
tr|E2R3D3|E2R3D3_CANLF	Uncharacterized protein OS=Canis lupus familiaris OX=9615 GN=RPL17 PE=3 SV=1
tr|A0A0N9JIB9|A0A0N9JIB9_CANLF	Tropomyosin 1 alpha OS=Canis lupus familiaris OX=9615 GN=Tpm1 PE=2 SV=1
tr|A0A077LQA5|A0A077LQA5_CANLF	Tubulin alpha chain OS=Canis lupus familiaris OX=9615 GN=TUBA1A PE=2 SV=1
tr|F1Q2T9|F1Q2T9_CANLF	Malic enzyme 1 OS=Canis lupus familiaris OX=9615 GN=ME1 PE=4 SV=1
tr|E2R198|E2R198_CANLF	Peptidyl-prolyl cis-trans isomerase OS=Canis lupus familiaris OX=9615 GN=PPIH PE=3 SV=1
tr|J9NTN4|J9NTN4_CANLF	ADP ribosylation factor like GTPase 3 OS=Canis lupus familiaris OX=9615 GN=ARL3 PE=3 SV=1
tr|J9NY23|J9NY23_CANLF	Late endosomal/lysosomal adaptor, MAPK and MTOR activator 3 OS=Canis lupus familiaris OX=9615 GN=LAMTOR3 PE=4 SV=1
tr|F1PDJ5|F1PDJ5_CANLF	Apolipoprotein A-I OS=Canis lupus familiaris OX=9615 GN=APOA1 PE=3 SV=1
tr|E2RTL3|E2RTL3_CANLF	Uncharacterized protein OS=Canis lupus familiaris OX=9615 GN=LZTFL1 PE=4 SV=1
tr|J9P4C5|J9P4C5_CANLF	BCL2 associated athanogene 2 OS=Canis lupus familiaris OX=9615 GN=BAG2 PE=4 SV=1
tr|J9P3R8|J9P3R8_CANLF	Immunity related GTPase Q OS=Canis lupus familiaris OX=9615 GN=IRGQ PE=4 SV=1
tr|E2QXD1|E2QXD1_CANLF	Annexin OS=Canis lupus familiaris OX=9615 GN=ANXA7 PE=3 SV=2
tr|E2RBX6|E2RBX6_CANLF	KDEL motif containing 2 OS=Canis lupus familiaris OX=9615 GN=KDELC2 PE=4 SV=2
tr|J9P1N0|J9P1N0_CANLF	Uncharacterized protein OS=Canis lupus familiaris OX=9615 GN=LOC100687259 PE=3 SV=1
tr|E2RNA7|E2RNA7_CANLF	Chitinase domain containing 1 OS=Canis lupus familiaris OX=9615 GN=TSPAN4 PE=3 SV=2
tr|E2RCD6|E2RCD6_CANLF	tRNA-splicing ligase RtcB homolog OS=Canis lupus familiaris OX=9615 GN=RTCB PE=3 SV=1
tr|E2QZB3|E2QZB3_CANLF	HSPA (Hsp70) binding protein 1 OS=Canis lupus familiaris OX=9615 GN=HSPBP1 PE=4 SV=1
tr|F1Q4K1|F1Q4K1_CANLF	Programmed cell death 5 OS=Canis lupus familiaris OX=9615 GN=PDCD5 PE=4 SV=2
tr|F1PQZ7|F1PQZ7_CANLF	Protein argonaute-2 OS=Canis lupus familiaris OX=9615 GN=AGO2 PE=3 SV=2
tr|F1PFR3|F1PFR3_CANLF	Histone-lysine N-methyltransferase OS=Canis lupus familiaris OX=9615 GN=SETD7 PE=3 SV=2
tr|F1PST8|F1PST8_CANLF	SPARC related modular calcium binding 2 OS=Canis lupus familiaris OX=9615 GN=SMOC2 PE=4 SV=1
tr|E2R2G5|E2R2G5_CANLF	Peptidylprolyl isomerase OS=Canis lupus familiaris OX=9615 GN=AIP PE=4 SV=1
tr|F1P6C1|F1P6C1_CANLF	Peptidyl-prolyl cis-trans isomerase OS=Canis lupus familiaris OX=9615 GN=PIN1 PE=4 SV=2
tr|F1Q0M6|F1Q0M6_CANLF	Nudix hydrolase 16 OS=Canis lupus familiaris OX=9615 GN=NUDT16 PE=4 SV=2
tr|E2RJ92|E2RJ92_CANLF	Acyl carrier protein OS=Canis lupus familiaris OX=9615 GN=NDUFAB1 PE=3 SV=1
tr|J9NWL3|J9NWL3_CANLF	Uncharacterized protein OS=Canis lupus familiaris OX=9615 PE=4 SV=1
tr|E2R1U9|E2R1U9_CANLF	Thiamine-triphosphatase OS=Canis lupus familiaris OX=9615 GN=THTPA PE=3 SV=1
tr|E2QTL3|E2QTL3_CANLF	Mitochondrial fission 1 protein OS=Canis lupus familiaris OX=9615 GN=FIS1 PE=3 SV=1
tr|F1PPZ2|F1PPZ2_CANLF	Ribonuclease 4 precursor OS=Canis lupus familiaris OX=9615 GN=RNASE4 PE=3 SV=2
tr|E2RPH1|E2RPH1_CANLF	RNA polymerase II subunit D OS=Canis lupus familiaris OX=9615 GN=POLR2D PE=4 SV=2
tr|E2RL97|E2RL97_CANLF	Canopy FGF signaling regulator 4 OS=Canis lupus familiaris OX=9615 GN=CNPY4 PE=4 SV=2
tr|E2RIY4|E2RIY4_CANLF	Ubiquitin conjugating enzyme E2 A OS=Canis lupus familiaris OX=9615 GN=UBE2A PE=3 SV=2
sp|P18067|RAB7A_CANLF	Ras-related protein Rab-7a OS=Canis lupus familiaris OX=9615 GN=RAB7A PE=1 SV=1
tr|E2R4I1|E2R4I1_CANLF	PRA1 family protein OS=Canis lupus familiaris OX=9615 GN=ARL6IP5 PE=3 SV=2
sp|D0VWQ3|RL18_CANLF	Ribosomal protein L18 OS=Canis lupus familiaris OX=9615 GN=RPL18 PE=1 SV=2
tr|E2RR01|E2RR01_CANLF	DEAD-box helicase 6 OS=Canis lupus familiaris OX=9615 GN=DDX6 PE=3 SV=1
tr|J9PAW7|J9PAW7_CANLF	Microtubule-actin crosslinking factor 1 OS=Canis lupus familiaris OX=9615 GN=MACF1 PE=4 SV=1
tr|E2R412|E2R412_CANLF	Phosphodiesterase 12 OS=Canis lupus familiaris OX=9615 GN=PDE12 PE=4 SV=2
tr|E2RNX1|E2RNX1_CANLF	HDGF like 3 OS=Canis lupus familiaris OX=9615 GN=HDGFL3 PE=4 SV=2
tr|E2RF02|E2RF02_CANLF	Ubiquitin protein ligase E3 component n-recognin 4 OS=Canis lupus familiaris OX=9615 GN=UBR4 PE=4 SV=1
tr|E2RNR9|E2RNR9_CANLF	Osteomodulin OS=Canis lupus familiaris OX=9615 GN=OMD PE=4 SV=2
tr|E2R912|E2R912_CANLF	Protein phosphatase, Mg2+/Mn2+ dependent 1F OS=Canis lupus familiaris OX=9615 GN=PPM1F PE=3 SV=2
tr|E2RD94|E2RD94_CANLF	Fibroblast activation protein alpha OS=Canis lupus familiaris OX=9615 GN=FAP PE=3 SV=2
tr|F1Q424|F1Q424_CANLF	60S ribosomal protein L6 OS=Canis lupus familiaris OX=9615 GN=RPL6 PE=3 SV=1
tr|F6URU8|F6URU8_CANLF	WAP four-disulfide core domain 1 OS=Canis lupus familiaris OX=9615 GN=WFDC1 PE=4 SV=1
tr|J9P098|J9P098_CANLF	Small nuclear ribonucleoprotein E OS=Canis lupus familiaris OX=9615 PE=3 SV=1
tr|F1PLT4|F1PLT4_CANLF	Nuclear autoantigenic sperm protein OS=Canis lupus familiaris OX=9615 GN=NASP PE=4 SV=2
tr|E2RR33|E2RR33_CANLF	Splicing factor 3b subunit 3 OS=Canis lupus familiaris OX=9615 GN=SF3B3 PE=4 SV=2
tr|F1PF85|F1PF85_CANLF	Uncharacterized protein OS=Canis lupus familiaris OX=9615 GN=RPL14 PE=4 SV=2
tr|E2R9I0|E2R9I0_CANLF	Polyadenylate-binding protein OS=Canis lupus familiaris OX=9615 GN=PABPC4 PE=3 SV=1
tr|E2RSG8|E2RSG8_CANLF	SEC24 homolog D, COPII coat complex component OS=Canis lupus familiaris OX=9615 GN=SEC24D PE=4 SV=2
tr|E2QZ13|E2QZ13_CANLF	3'-phosphoadenosine 5'-phosphosulfate synthase 1 OS=Canis lupus familiaris OX=9615 GN=PAPSS1 PE=3 SV=1
tr|E2RD70|E2RD70_CANLF	COP9 signalosome subunit 3 OS=Canis lupus familiaris OX=9615 GN=COPS3 PE=4 SV=1
tr|E2RM43|E2RM43_CANLF	Uncharacterized protein OS=Canis lupus familiaris OX=9615 PE=4 SV=2
tr|E2RDZ4|E2RDZ4_CANLF	Eukaryotic translation initiation factor 4A3 OS=Canis lupus familiaris OX=9615 GN=EIF4A3 PE=3 SV=1
tr|E2RM30|E2RM30_CANLF	Tissue specific transplantation antigen P35B OS=Canis lupus familiaris OX=9615 GN=TSTA3 PE=3 SV=1
tr|E2R0G3|E2R0G3_CANLF	U2 snRNP auxiliary factor large subunit OS=Canis lupus familiaris OX=9615 GN=U2AF2 PE=3 SV=2
tr|F1PYG5|F1PYG5_CANLF	Adaptor related protein complex 1 subunit mu 1 OS=Canis lupus familiaris OX=9615 GN=AP1M1 PE=3 SV=1
tr|F1P6K2|F1P6K2_CANLF	Nicotinamide phosphoribosyltransferase OS=Canis lupus familiaris OX=9615 GN=NAMPT PE=3 SV=1
tr|E2RFI6|E2RFI6_CANLF	Translocase of inner mitochondrial membrane 50 OS=Canis lupus familiaris OX=9615 GN=TIMM50 PE=4 SV=2
tr|F1Q4F5|F1Q4F5_CANLF	Adenylosuccinate synthetase isozyme 2 OS=Canis lupus familiaris OX=9615 GN=ADSS PE=3 SV=2
tr|E2R5E7|E2R5E7_CANLF	Chromosome 5 C1orf123 homolog OS=Canis lupus familiaris OX=9615 GN=C5H1orf123 PE=4 SV=2
tr|E2RQ04|E2RQ04_CANLF	Proline rich coiled-coil 1 OS=Canis lupus familiaris OX=9615 GN=PRRC1 PE=4 SV=2
tr|E2R7Z2|E2R7Z2_CANLF	Muscleblind like splicing regulator 3 OS=Canis lupus familiaris OX=9615 GN=MBNL3 PE=4 SV=2
tr|E2R8C0|E2R8C0_CANLF	Apoptotic chromatin condensation inducer 1 OS=Canis lupus familiaris OX=9615 GN=ACIN1 PE=4 SV=1
tr|E2REK3|E2REK3_CANLF	Eukaryotic translation initiation factor 3 subunit D OS=Canis lupus familiaris OX=9615 GN=EIF3D PE=3 SV=2
tr|E2RMB9|E2RMB9_CANLF	N-Myc downstream regulated gene 1 OS=Canis lupus familiaris OX=9615 GN=NDRG1 PE=2 SV=1
tr|F1Q0H3|F1Q0H3_CANLF	Ras-related protein Rab-1A OS=Canis lupus familiaris OX=9615 GN=RAB1A PE=4 SV=2
tr|L7N0I1|L7N0I1_CANLF	Myosin light chain 12B OS=Canis lupus familiaris OX=9615 GN=MYL12B PE=4 SV=1
tr|F1PKR6|F1PKR6_CANLF	Ribosomal protein S16 OS=Canis lupus familiaris OX=9615 GN=RPS16 PE=3 SV=2
tr|E2R1S5|E2R1S5_CANLF	Eukaryotic translation initiation factor 6 OS=Canis lupus familiaris OX=9615 GN=EIF6 PE=3 SV=2
tr|J9NSX4|J9NSX4_CANLF	Uncharacterized protein OS=Canis lupus familiaris OX=9615 PE=4 SV=1
tr|F1PQD4|F1PQD4_CANLF	Septin 8 OS=Canis lupus familiaris OX=9615 GN=SEPT8 PE=3 SV=2
tr|E2QYZ9|E2QYZ9_CANLF	NHP2 ribonucleoprotein OS=Canis lupus familiaris OX=9615 GN=NHP2 PE=4 SV=1
sp|Q8HY67|AN32A_CANLF	Acidic leucine-rich nuclear phosphoprotein 32 family member A OS=Canis lupus familiaris OX=9615 GN=ANP32A PE=2 SV=1
tr|E2R9P2|E2R9P2_CANLF	S100 calcium binding protein A13 OS=Canis lupus familiaris OX=9615 GN=S100A13 PE=3 SV=1
tr|E2R7V4|E2R7V4_CANLF	BCL2 associated athanogene 4 OS=Canis lupus familiaris OX=9615 GN=BAG4 PE=4 SV=1
tr|S5THQ6|S5THQ6_CANLF	DDX3Y OS=Canis lupus familiaris OX=9615 GN=DDX3Y PE=2 SV=1
tr|J9NTX8|J9NTX8_CANLF	Connective tissue growth factor OS=Canis lupus familiaris OX=9615 GN=CTGF PE=4 SV=1
tr|J9NV99|J9NV99_CANLF	Y-box binding protein 3 OS=Canis lupus familiaris OX=9615 GN=YBX3 PE=4 SV=1
tr|E2R7J9|E2R7J9_CANLF	Treacle ribosome biogenesis factor 1 OS=Canis lupus familiaris OX=9615 GN=TCOF1 PE=4 SV=2
tr|E2R5N5|E2R5N5_CANLF	Proteasome 26S subunit, non-ATPase 13 OS=Canis lupus familiaris OX=9615 GN=PSMD13 PE=4 SV=1
tr|E2RS63|E2RS63_CANLF	Fumarylacetoacetate hydrolase OS=Canis lupus familiaris OX=9615 GN=FAH PE=4 SV=2
tr|B4YY02|B4YY02_CANLF	Adenylate kinase isoenzyme 1 OS=Canis lupus familiaris OX=9615 GN=AK1 PE=3 SV=1
tr|E2RJL3|E2RJL3_CANLF	Serine and arginine rich splicing factor 1 OS=Canis lupus familiaris OX=9615 GN=SRSF1 PE=4 SV=2
tr|F1PQ79|F1PQ79_CANLF	Adaptor related protein complex 2 subunit mu 1 OS=Canis lupus familiaris OX=9615 GN=AP2M1 PE=3 SV=1
tr|J9NYI1|J9NYI1_CANLF	Retinoic acid receptor responder 1 OS=Canis lupus familiaris OX=9615 GN=RARRES1 PE=4 SV=1
tr|F1PEG9|F1PEG9_CANLF	Reticulocalbin 2 OS=Canis lupus familiaris OX=9615 GN=RCN2 PE=4 SV=2
tr|F1PSX9|F1PSX9_CANLF	Hyaluronidase OS=Canis lupus familiaris OX=9615 GN=HYAL1 PE=3 SV=2
tr|C5NM83|C5NM83_CANLF	Chromogranin A (Fragment) OS=Canis lupus familiaris OX=9615 PE=2 SV=1
tr|E2RNB6|E2RNB6_CANLF	Crystallin alpha B OS=Canis lupus familiaris OX=9615 GN=CRYAB PE=3 SV=1
tr|J9PAN4|J9PAN4_CANLF	Lysophospholipase II OS=Canis lupus familiaris OX=9615 GN=LYPLA2 PE=4 SV=1
tr|F1Q133|F1Q133_CANLF	Collagen type IV alpha 1 chain OS=Canis lupus familiaris OX=9615 GN=COL4A1 PE=4 SV=2
tr|F1PBV5|F1PBV5_CANLF	Syntrophin beta 2 OS=Canis lupus familiaris OX=9615 GN=SNTB2 PE=4 SV=2
tr|F6XPP6|F6XPP6_CANLF	Golgin B1 OS=Canis lupus familiaris OX=9615 GN=GOLGB1 PE=4 SV=1
tr|F1P6V8|F1P6V8_CANLF	Dynein cytoplasmic 1 light intermediate chain 2 OS=Canis lupus familiaris OX=9615 GN=DYNC1LI2 PE=4 SV=2
tr|J9P061|J9P061_CANLF	Small nuclear ribonucleoprotein G OS=Canis lupus familiaris OX=9615 GN=SNRPG PE=3 SV=1
tr|E2RNJ3|E2RNJ3_CANLF	Lysosomal associated membrane protein 2 OS=Canis lupus familiaris OX=9615 GN=LAMP2 PE=3 SV=1
tr|F1PYK5|F1PYK5_CANLF	Colony stimulating factor 1 OS=Canis lupus familiaris OX=9615 GN=CSF1 PE=4 SV=1
tr|E2RT60|E2RT60_CANLF	Integrin beta OS=Canis lupus familiaris OX=9615 GN=ITGB1 PE=3 SV=2
tr|E2QXW5|E2QXW5_CANLF	Four and a half LIM domains 3 OS=Canis lupus familiaris OX=9615 GN=FHL3 PE=4 SV=2
tr|F1Q0Z5|F1Q0Z5_CANLF	Signal recognition particle 9 kDa protein OS=Canis lupus familiaris OX=9615 GN=SRP9 PE=3 SV=1
tr|J9JHK9|J9JHK9_CANLF	1-phosphatidylinositol 4,5-bisphosphate phosphodiesterase OS=Canis lupus familiaris OX=9615 GN=PLCB3 PE=4 SV=1
tr|E2R1I9|E2R1I9_CANLF	Hyaluronan and proteoglycan link protein 3 OS=Canis lupus familiaris OX=9615 GN=HAPLN3 PE=4 SV=2
tr|E2RGN0|E2RGN0_CANLF	Plasminogen activator, urokinase receptor OS=Canis lupus familiaris OX=9615 GN=PLAUR PE=4 SV=2
tr|E2QRU0|E2QRU0_CANLF	DnaJ heat shock protein family (Hsp40) member C8 OS=Canis lupus familiaris OX=9615 GN=DNAJC8 PE=4 SV=1
tr|E2R9R5|E2R9R5_CANLF	Peptidylprolyl isomerase OS=Canis lupus familiaris OX=9615 GN=FKBP2 PE=4 SV=2
tr|E2R5Z9|E2R5Z9_CANLF	Phosphoglucomutase 3 (Fragment) OS=Canis lupus familiaris OX=9615 GN=PGM3 PE=4 SV=2
tr|E2RQY3|E2RQY3_CANLF	Angiopoietin like 1 OS=Canis lupus familiaris OX=9615 GN=ANGPTL1 PE=4 SV=1
tr|F1P8W3|F1P8W3_CANLF	Osteoclast stimulating factor 1 OS=Canis lupus familiaris OX=9615 GN=OSTF1 PE=4 SV=2
tr|J9P0H8|J9P0H8_CANLF	Pyridoxal phosphate homeostasis protein OS=Canis lupus familiaris OX=9615 GN=PROSC PE=3 SV=1
tr|J9P2D7|J9P2D7_CANLF	Early endosome antigen 1 OS=Canis lupus familiaris OX=9615 GN=EEA1 PE=4 SV=1
sp|Q9GL24|CATL1_CANLF	Cathepsin L1 OS=Canis lupus familiaris OX=9615 GN=CTSL PE=2 SV=1
tr|E2RAE6|E2RAE6_CANLF	Sorting nexin OS=Canis lupus familiaris OX=9615 GN=SNX5 PE=3 SV=1
tr|F6V7F8|F6V7F8_CANLF	Vacuolar protein sorting 13 homolog C OS=Canis lupus familiaris OX=9615 GN=VPS13C PE=4 SV=1
tr|F1PZ34|F1PZ34_CANLF	Epidermal growth factor receptor pathway substrate 15 like 1 OS=Canis lupus familiaris OX=9615 GN=EPS15L1 PE=4 SV=2
tr|F1Q3G2|F1Q3G2_CANLF	Slit guidance ligand 3 OS=Canis lupus familiaris OX=9615 GN=SLIT3 PE=4 SV=2
tr|F1PHI4|F1PHI4_CANLF	Uncharacterized protein OS=Canis lupus familiaris OX=9615 GN=ACY1 PE=4 SV=2
tr|E2RK00|E2RK00_CANLF	Dynein light chain OS=Canis lupus familiaris OX=9615 GN=DYNLL1 PE=3 SV=1
tr|E2R129|E2R129_CANLF	Elongin C OS=Canis lupus familiaris OX=9615 GN=ELOC PE=3 SV=2
sp|A0M8V0|CAZA2_CANLF	F-actin-capping protein subunit alpha-2 OS=Canis lupus familiaris OX=9615 GN=CAPZA2 PE=3 SV=1
tr|E2RBV8|E2RBV8_CANLF	Heterogeneous nuclear ribonucleoprotein A0 OS=Canis lupus familiaris OX=9615 GN=HNRNPA0 PE=4 SV=1
tr|E2RQW2|E2RQW2_CANLF	Cysteine and histidine rich domain containing 1 OS=Canis lupus familiaris OX=9615 GN=CHORDC1 PE=4 SV=2
tr|E2R0P2|E2R0P2_CANLF	NudC domain containing 1 OS=Canis lupus familiaris OX=9615 GN=NUDCD1 PE=4 SV=2
tr|E2RSJ3|E2RSJ3_CANLF	LIM domain containing preferred translocation partner in lipoma OS=Canis lupus familiaris OX=9615 GN=LPP PE=4 SV=2
tr|E2QUQ0|E2QUQ0_CANLF	Actinin alpha 2 OS=Canis lupus familiaris OX=9615 GN=ACTN2 PE=4 SV=2
tr|F1PUU4|F1PUU4_CANLF	FLII, actin remodeling protein OS=Canis lupus familiaris OX=9615 GN=FLII PE=4 SV=2
tr|F1Q0Z2|F1Q0Z2_CANLF	Uncharacterized protein OS=Canis lupus familiaris OX=9615 GN=RPL7 PE=4 SV=2
tr|E2R097|E2R097_CANLF	X-prolyl aminopeptidase 1 OS=Canis lupus familiaris OX=9615 GN=XPNPEP1 PE=3 SV=2
tr|E2R030|E2R030_CANLF	Gremlin OS=Canis lupus familiaris OX=9615 GN=GREM1 PE=3 SV=1
tr|E2RA06|E2RA06_CANLF	KN motif and ankyrin repeat domains 2 OS=Canis lupus familiaris OX=9615 GN=KANK2 PE=4 SV=1
tr|J9P7U8|J9P7U8_CANLF	Peptidylprolyl isomerase E OS=Canis lupus familiaris OX=9615 GN=PPIE PE=4 SV=1
tr|J9P8V7|J9P8V7_CANLF	Uncharacterized protein OS=Canis lupus familiaris OX=9615 GN=NACA PE=4 SV=1
tr|E2R134|E2R134_CANLF	Carnosine dipeptidase 2 OS=Canis lupus familiaris OX=9615 GN=CNDP2 PE=4 SV=2
tr|F1PAW8|F1PAW8_CANLF	Coiled-coil domain containing 86 OS=Canis lupus familiaris OX=9615 GN=CCDC86 PE=4 SV=2
sp|Q5TJE6|PFD6_CANLF	Prefoldin subunit 6 OS=Canis lupus familiaris OX=9615 GN=PFDN6 PE=3 SV=1
tr|F1PJ90|F1PJ90_CANLF	Ankyrin 3 OS=Canis lupus familiaris OX=9615 GN=ANK3 PE=4 SV=2
tr|F1Q0L3|F1Q0L3_CANLF	Caveolae associated protein 3 OS=Canis lupus familiaris OX=9615 GN=CAVIN3 PE=4 SV=2
tr|F6XY66|F6XY66_CANLF	Transforming protein RhoA OS=Canis lupus familiaris OX=9615 GN=RHOA PE=4 SV=1
tr|E2RJN7|E2RJN7_CANLF	Protein lin-7 homolog OS=Canis lupus familiaris OX=9615 GN=CCDC34 PE=3 SV=2
tr|E2RQV6|E2RQV6_CANLF	Serrate, RNA effector molecule OS=Canis lupus familiaris OX=9615 GN=SRRT PE=4 SV=1
tr|E2RQN4|E2RQN4_CANLF	Uncharacterized protein OS=Canis lupus familiaris OX=9615 GN=LOC609095 PE=3 SV=1
tr|F1PZP6|F1PZP6_CANLF	Leucyl-tRNA synthetase OS=Canis lupus familiaris OX=9615 GN=LARS PE=3 SV=2
tr|L7N094|L7N094_CANLF	Keratin 3 OS=Canis lupus familiaris OX=9615 GN=KRT3 PE=3 SV=1
sp|Q4LAL9|CATD_CANLF	Cathepsin D OS=Canis lupus familiaris OX=9615 GN=CTSD PE=2 SV=1
tr|J9P0B2|J9P0B2_CANLF	Histone H2A OS=Canis lupus familiaris OX=9615 GN=LOC488291 PE=3 SV=1
tr|E2QXB6|E2QXB6_CANLF	Lactamase beta 2 OS=Canis lupus familiaris OX=9615 GN=LACTB2 PE=4 SV=1
tr|F1PC42|F1PC42_CANLF	ADAMTS like 1 OS=Canis lupus familiaris OX=9615 GN=ADAMTSL1 PE=4 SV=2
tr|G1K2A7|G1K2A7_CANLF	Cathepsin K OS=Canis lupus familiaris OX=9615 GN=CTSK PE=3 SV=2
tr|J9NT16|J9NT16_CANLF	Uncharacterized protein OS=Canis lupus familiaris OX=9615 PE=4 SV=1
tr|E2QYZ4|E2QYZ4_CANLF	Lysyl oxidase like 3 OS=Canis lupus familiaris OX=9615 GN=LOXL3 PE=4 SV=1
tr|E2RR79|E2RR79_CANLF	Ubiquitin like domain containing CTD phosphatase 1 OS=Canis lupus familiaris OX=9615 GN=UBLCP1 PE=4 SV=1
tr|E2R9R2|E2R9R2_CANLF	Cytochrome c oxidase subunit OS=Canis lupus familiaris OX=9615 GN=LOC612644 PE=3 SV=2
tr|J9JHW4|J9JHW4_CANLF	Proteasome endopeptidase complex OS=Canis lupus familiaris OX=9615 PE=3 SV=1
tr|J9PAW2|J9PAW2_CANLF	Importin subunit alpha OS=Canis lupus familiaris OX=9615 GN=KPNA4 PE=3 SV=1
sp|P05123|KCRM_CANLF	Creatine kinase M-type OS=Canis lupus familiaris OX=9615 GN=CKM PE=1 SV=3
tr|A1DZY5|A1DZY5_CANLF	Diablo IAP-binding mitochondrial protein OS=Canis lupus familiaris OX=9615 GN=DIABLO PE=2 SV=1
tr|F1PF03|F1PF03_CANLF	Receptor protein-tyrosine kinase OS=Canis lupus familiaris OX=9615 GN=EGFR PE=3 SV=2
tr|E2RH53|E2RH53_CANLF	Adenylyl cyclase-associated protein OS=Canis lupus familiaris OX=9615 GN=CAP2 PE=3 SV=1
tr|F1PPJ1|F1PPJ1_CANLF	Uncharacterized protein OS=Canis lupus familiaris OX=9615 GN=PIP4K2A PE=4 SV=2
tr|F6V322|F6V322_CANLF	CDK5 regulatory subunit associated protein 3 OS=Canis lupus familiaris OX=9615 GN=CDK5RAP3 PE=4 SV=1
tr|E2R4X9|E2R4X9_CANLF	Pre-mRNA processing factor 8 OS=Canis lupus familiaris OX=9615 GN=PRPF8 PE=4 SV=2
tr|E2R4F5|E2R4F5_CANLF	60S ribosomal protein L13 OS=Canis lupus familiaris OX=9615 GN=RPL13 PE=3 SV=1
tr|F1PF15|F1PF15_CANLF	MAP7 domain containing 1 OS=Canis lupus familiaris OX=9615 GN=MAP7D1 PE=4 SV=2
tr|E2RNV4|E2RNV4_CANLF	Heme binding protein 1 OS=Canis lupus familiaris OX=9615 GN=HEBP1 PE=4 SV=1
tr|E2QVG1|E2QVG1_CANLF	Gremlin OS=Canis lupus familiaris OX=9615 GN=GREM2 PE=3 SV=1
tr|F1Q0H0|F1Q0H0_CANLF	N-acylglucosamine 2-epimerase OS=Canis lupus familiaris OX=9615 GN=RENBP PE=4 SV=2
sp|P33731|SRP72_CANLF	Signal recognition particle subunit SRP72 OS=Canis lupus familiaris OX=9615 GN=SRP72 PE=1 SV=3
tr|J9P5V0|J9P5V0_CANLF	40S ribosomal protein S4 OS=Canis lupus familiaris OX=9615 PE=3 SV=1
tr|E2RGF3|E2RGF3_CANLF	Na(+)/H(+) exchange regulatory cofactor NHE-RF OS=Canis lupus familiaris OX=9615 GN=SLC9A3R1 PE=4 SV=2
tr|F1PAM9|F1PAM9_CANLF	Epidermal growth factor receptor pathway substrate 15 OS=Canis lupus familiaris OX=9615 GN=EPS15 PE=4 SV=2
tr|F1PRK3|F1PRK3_CANLF	Uncharacterized protein OS=Canis lupus familiaris OX=9615 PE=4 SV=2
tr|E2RC33|E2RC33_CANLF	Nucleolar protein 3 OS=Canis lupus familiaris OX=9615 GN=NOL3 PE=4 SV=2
tr|E2QXA5|E2QXA5_CANLF	Thymosin beta OS=Canis lupus familiaris OX=9615 GN=TMSB10 PE=3 SV=1
tr|F1PSI7|F1PSI7_CANLF	Small nuclear ribonucleoprotein Sm D2 OS=Canis lupus familiaris OX=9615 GN=SNRPD2 PE=3 SV=2
tr|F1Q043|F1Q043_CANLF	SEC24 homolog B, COPII coat complex component OS=Canis lupus familiaris OX=9615 GN=SEC24B PE=4 SV=2
tr|J9P5X5|J9P5X5_CANLF	TGF-beta activated kinase 1 (MAP3K7) binding protein 1 OS=Canis lupus familiaris OX=9615 GN=TAB1 PE=4 SV=1
tr|J9NWC7|J9NWC7_CANLF	Multiple inositol-polyphosphate phosphatase 1 OS=Canis lupus familiaris OX=9615 GN=MINPP1 PE=3 SV=1
tr|E2RQV7|E2RQV7_CANLF	NOP58 ribonucleoprotein OS=Canis lupus familiaris OX=9615 GN=NOP58 PE=4 SV=2
tr|E2RDP4|E2RDP4_CANLF	Adhesion regulating molecule 1 OS=Canis lupus familiaris OX=9615 GN=ADRM1 PE=4 SV=1
tr|E2RT72|E2RT72_CANLF	ADP ribosylation factor GTPase activating protein 3 OS=Canis lupus familiaris OX=9615 GN=ARFGAP3 PE=4 SV=2
tr|F1PGD7|F1PGD7_CANLF	Ribosomal protein L24 OS=Canis lupus familiaris OX=9615 GN=RPL24 PE=4 SV=2
tr|E2QYC2|E2QYC2_CANLF	Tubulin beta chain OS=Canis lupus familiaris OX=9615 GN=TUBB6 PE=3 SV=1
tr|J9P7P2|J9P7P2_CANLF	Uncharacterized protein OS=Canis lupus familiaris OX=9615 GN=LOC610164 PE=3 SV=1
tr|F6UQI5|F6UQI5_CANLF	Uncharacterized protein OS=Canis lupus familiaris OX=9615 GN=LUC7L2 PE=4 SV=1
tr|E2RTA2|E2RTA2_CANLF	Sorting nexin 12 OS=Canis lupus familiaris OX=9615 GN=SNX12 PE=4 SV=2
tr|E2RIQ2|E2RIQ2_CANLF	Cortactin OS=Canis lupus familiaris OX=9615 GN=CTTN PE=4 SV=2
tr|J9P4L2|J9P4L2_CANLF	Endoplasmic reticulum protein 29 OS=Canis lupus familiaris OX=9615 GN=ERP29 PE=4 SV=1
tr|F1PEF9|F1PEF9_CANLF	Sperm antigen with calponin homology and coiled-coil domains 1 OS=Canis lupus familiaris OX=9615 GN=SPECC1 PE=4 SV=2
tr|F1PK77|F1PK77_CANLF	Sperm associated antigen 9 OS=Canis lupus familiaris OX=9615 GN=SPAG9 PE=4 SV=2
tr|E2RJ28|E2RJ28_CANLF	Protein tyrosine phosphatase, non-receptor type 23 OS=Canis lupus familiaris OX=9615 GN=PTPN23 PE=4 SV=2
tr|E2QZN3|E2QZN3_CANLF	Eukaryotic translation initiation factor 2B subunit beta OS=Canis lupus familiaris OX=9615 GN=EIF2B2 PE=3 SV=1
tr|E2RNE4|E2RNE4_CANLF	Family with sequence similarity 114 member A2 OS=Canis lupus familiaris OX=9615 GN=FAM114A2 PE=4 SV=2
tr|F6X4P9|F6X4P9_CANLF	Solute carrier family 38 member 10 OS=Canis lupus familiaris OX=9615 GN=SLC38A10 PE=4 SV=1
tr|F1PQQ4|F1PQQ4_CANLF	GTP-binding protein OS=Canis lupus familiaris OX=9615 GN=REM1 PE=3 SV=2
sp|E2QXF3|RL15_CANLF	60S ribosomal protein L15 OS=Canis lupus familiaris OX=9615 GN=RPL15 PE=1 SV=1
tr|E2RRJ6|E2RRJ6_CANLF	AP complex subunit beta OS=Canis lupus familiaris OX=9615 GN=AP1B1 PE=3 SV=2
tr|J9NWK8|J9NWK8_CANLF	Caspase 6 OS=Canis lupus familiaris OX=9615 GN=CASP6 PE=3 SV=1
tr|E2QZF6|E2QZF6_CANLF	Ubiquitin specific peptidase 39 OS=Canis lupus familiaris OX=9615 GN=USP39 PE=4 SV=1
tr|F1PH39|F1PH39_CANLF	Coiled-coil domain containing 88B OS=Canis lupus familiaris OX=9615 GN=CCDC88B PE=4 SV=2
tr|J9P2A6|J9P2A6_CANLF	Exportin for tRNA OS=Canis lupus familiaris OX=9615 GN=XPOT PE=4 SV=1
sp|Q9GL21-2|UACA_CANLF	Isoform 2 of Uveal autoantigen with coiled-coil domains and ankyrin repeats OS=Canis lupus familiaris OX=9615 GN=UACA
tr|F1PGZ0|F1PGZ0_CANLF	BCL2 associated athanogene 1 OS=Canis lupus familiaris OX=9615 GN=BAG1 PE=4 SV=2
tr|E2R4J1|E2R4J1_CANLF	Laminin subunit beta 2 OS=Canis lupus familiaris OX=9615 GN=LAMB2 PE=4 SV=1
tr|E2RH48|E2RH48_CANLF	Proteasome 26S subunit, ATPase 4 OS=Canis lupus familiaris OX=9615 GN=PSMC4 PE=3 SV=1
tr|F6V393|F6V393_CANLF	VPS26, retromer complex component A OS=Canis lupus familiaris OX=9615 GN=VPS26A PE=4 SV=1
tr|F1PN76|F1PN76_CANLF	Ankyrin repeat and FYVE domain containing 1 OS=Canis lupus familiaris OX=9615 GN=ANKFY1 PE=4 SV=2
tr|E2R812|E2R812_CANLF	Golgi SNAP receptor complex member 1 OS=Canis lupus familiaris OX=9615 GN=GOSR1 PE=3 SV=1
tr|F1PZ83|F1PZ83_CANLF	Prostaglandin I2 synthase OS=Canis lupus familiaris OX=9615 GN=PTGIS PE=3 SV=2
tr|F1P7Y6|F1P7Y6_CANLF	Uncharacterized protein OS=Canis lupus familiaris OX=9615 PE=4 SV=2
tr|E2RBF4|E2RBF4_CANLF	THUMP domain containing 1 OS=Canis lupus familiaris OX=9615 GN=THUMPD1 PE=4 SV=2
tr|E2RGM1|E2RGM1_CANLF	tRNA methyltransferase subunit 11-2 OS=Canis lupus familiaris OX=9615 GN=TRMT112 PE=4 SV=1
sp|Q5XFN2|DESM_CANLF	Desmin OS=Canis lupus familiaris OX=9615 GN=DES PE=3 SV=3
tr|E2RHA6|E2RHA6_CANLF	Rabenosyn, RAB effector OS=Canis lupus familiaris OX=9615 GN=RBSN PE=4 SV=1
tr|E2RB34|E2RB34_CANLF	Nucleoporin 133 OS=Canis lupus familiaris OX=9615 GN=NUP133 PE=4 SV=2
tr|F1PTF8|F1PTF8_CANLF	Phosphoinositide-3-kinase regulatory subunit 6 OS=Canis lupus familiaris OX=9615 GN=PIK3R6 PE=4 SV=2
tr|J9NXV3|J9NXV3_CANLF	Vitrin OS=Canis lupus familiaris OX=9615 GN=VIT PE=4 SV=1
tr|J9JHP7|J9JHP7_CANLF	Uncharacterized protein OS=Canis lupus familiaris OX=9615 GN=AKAP17A PE=4 SV=1
tr|F1Q2D2|F1Q2D2_CANLF	Glutathione synthetase OS=Canis lupus familiaris OX=9615 GN=GSS PE=3 SV=1
tr|J9NUV0|J9NUV0_CANLF	Ras-related protein Rab-10 OS=Canis lupus familiaris OX=9615 GN=RAB10 PE=4 SV=1
tr|E2RQI7|E2RQI7_CANLF	NGG1 interacting factor 3 like 1 OS=Canis lupus familiaris OX=9615 GN=NIF3L1 PE=4 SV=2
tr|F1PKH2|F1PKH2_CANLF	Transforming growth factor beta OS=Canis lupus familiaris OX=9615 GN=TGFB2 PE=3 SV=1
tr|E2R7C2|E2R7C2_CANLF	Methylthioribose-1-phosphate isomerase OS=Canis lupus familiaris OX=9615 GN=MRI1 PE=3 SV=1
tr|J9P0D5|J9P0D5_CANLF	Golgi phosphoprotein 3 like OS=Canis lupus familiaris OX=9615 GN=GOLPH3L PE=4 SV=1
tr|E2RRF8|E2RRF8_CANLF	Deoxyuridine triphosphatase OS=Canis lupus familiaris OX=9615 GN=DUT PE=4 SV=2
tr|F1Q4J5|F1Q4J5_CANLF	Microtubule associated protein 1 light chain 3 alpha OS=Canis lupus familiaris OX=9615 GN=MAP1LC3A PE=3 SV=2
tr|E2RR74|E2RR74_CANLF	Calcium/calmodulin dependent protein kinase II delta OS=Canis lupus familiaris OX=9615 GN=CAMK2D PE=4 SV=2
tr|F1P8H7|F1P8H7_CANLF	Large 60S subunit nuclear export GTPase 1 OS=Canis lupus familiaris OX=9615 GN=LSG1 PE=4 SV=2
tr|E2QXZ2|E2QXZ2_CANLF	Spliceosome associated factor 3, U4/U6 recycling protein OS=Canis lupus familiaris OX=9615 GN=SART3 PE=4 SV=2
tr|J9NSU1|J9NSU1_CANLF	Inositol polyphosphate-1-phosphatase OS=Canis lupus familiaris OX=9615 GN=INPP1 PE=4 SV=1
tr|E2RTD3|E2RTD3_CANLF	Protein Wnt OS=Canis lupus familiaris OX=9615 GN=WNT10B PE=3 SV=2
tr|J9P1S2|J9P1S2_CANLF	Ras converting CAAX endopeptidase 1 OS=Canis lupus familiaris OX=9615 GN=RCE1 PE=4 SV=1
tr|E2RSU7|E2RSU7_CANLF	Activator of HSP90 ATPase activity 1 OS=Canis lupus familiaris OX=9615 GN=AHSA1 PE=4 SV=1
tr|E2RAC6|E2RAC6_CANLF	ATPase H+ transporting V1 subunit B2 OS=Canis lupus familiaris OX=9615 GN=ATP6V1B2 PE=3 SV=2
tr|F1Q0K5|F1Q0K5_CANLF	Triokinase and FMN cyclase OS=Canis lupus familiaris OX=9615 GN=TKFC PE=4 SV=2
tr|A0A0A0MPD3|A0A0A0MPD3_CANLF	NAD(P)H-hydrate epimerase OS=Canis lupus familiaris OX=9615 GN=NAXE PE=3 SV=1
tr|E2RLU9|E2RLU9_CANLF	Quinoid dihydropteridine reductase OS=Canis lupus familiaris OX=9615 GN=QDPR PE=4 SV=1
tr|J9P1N5|J9P1N5_CANLF	Uncharacterized protein OS=Canis lupus familiaris OX=9615 PE=4 SV=1
tr|E2RPH0|E2RPH0_CANLF	Nudix hydrolase 9 OS=Canis lupus familiaris OX=9615 GN=NUDT9 PE=4 SV=2
tr|F6Y241|F6Y241_CANLF	Vacuolar protein sorting 45 homolog OS=Canis lupus familiaris OX=9615 GN=VPS45 PE=3 SV=1
tr|J9P249|J9P249_CANLF	Fas associated factor 1 OS=Canis lupus familiaris OX=9615 GN=FAF1 PE=4 SV=1
tr|E2RNC3|E2RNC3_CANLF	Dynamin 2 OS=Canis lupus familiaris OX=9615 GN=DNM2 PE=3 SV=2
tr|E2RBJ1|E2RBJ1_CANLF	Eukaryotic translation initiation factor 2B subunit gamma OS=Canis lupus familiaris OX=9615 GN=EIF2B3 PE=4 SV=2
tr|E2RLA8|E2RLA8_CANLF	Platelet activating factor acetylhydrolase 1b catalytic subunit 3 OS=Canis lupus familiaris OX=9615 GN=PAFAH1B3 PE=4 SV=2
tr|E2RCH8|E2RCH8_CANLF	PWP1 homolog, endonuclein OS=Canis lupus familiaris OX=9615 GN=PWP1 PE=4 SV=2
tr|F6V080|F6V080_CANLF	Branched chain ketoacid dehydrogenase kinase OS=Canis lupus familiaris OX=9615 GN=BCKDK PE=4 SV=1
tr|F1PSV4|F1PSV4_CANLF	Uncharacterized protein OS=Canis lupus familiaris OX=9615 GN=RNASET2 PE=3 SV=2
tr|F6XGZ6|F6XGZ6_CANLF	H/ACA ribonucleoprotein complex subunit OS=Canis lupus familiaris OX=9615 GN=GAR1 PE=3 SV=1
tr|E2QWX5|E2QWX5_CANLF	Trafficking protein particle complex subunit OS=Canis lupus familiaris OX=9615 GN=TRAPPC3 PE=3 SV=1
tr|E2RSM4|E2RSM4_CANLF	Lipocalin 2 OS=Canis lupus familiaris OX=9615 GN=LCN2 PE=3 SV=1
tr|F1PBA9|F1PBA9_CANLF	Promyelocytic leukemia OS=Canis lupus familiaris OX=9615 GN=PML PE=4 SV=2
tr|E2RB43|E2RB43_CANLF	RNA polymerase II associated protein 3 OS=Canis lupus familiaris OX=9615 GN=RPAP3 PE=4 SV=1
tr|F6Y4Y7|F6Y4Y7_CANLF	TATA element modulatory factor 1 OS=Canis lupus familiaris OX=9615 GN=TMF1 PE=4 SV=1
tr|E2R8L3|E2R8L3_CANLF	Pre-mRNA processing factor 19 OS=Canis lupus familiaris OX=9615 GN=PRPF19 PE=4 SV=2
tr|F1PHF0|F1PHF0_CANLF	N-acetylgalactosamine-6-sulfatase OS=Canis lupus familiaris OX=9615 GN=GALNS PE=4 SV=2
sp|Q06220|SCF_CANLF	Kit ligand OS=Canis lupus familiaris OX=9615 GN=KITLG PE=2 SV=1
tr|J9NW81|J9NW81_CANLF	Chromodomain helicase DNA binding protein 4 OS=Canis lupus familiaris OX=9615 GN=CHD4 PE=4 SV=1
tr|J9P0A6|J9P0A6_CANLF	Developmentally regulated GTP binding protein 1 OS=Canis lupus familiaris OX=9615 GN=DRG1 PE=4 SV=1
tr|J9NZX6|J9NZX6_CANLF	Ribosomal protein S23 OS=Canis lupus familiaris OX=9615 GN=RPS23 PE=3 SV=1
tr|F1PBK9|F1PBK9_CANLF	BCL2 associated athanogene 6 OS=Canis lupus familiaris OX=9615 GN=BAG6 PE=4 SV=2
tr|J9NSW7|J9NSW7_CANLF	Uncharacterized protein OS=Canis lupus familiaris OX=9615 PE=4 SV=1
tr|E2RBD1|E2RBD1_CANLF	Nucleolar and coiled-body phosphoprotein 1 OS=Canis lupus familiaris OX=9615 GN=NOLC1 PE=4 SV=2
tr|F1PX11|F1PX11_CANLF	Potassium channel modulatory factor 1 OS=Canis lupus familiaris OX=9615 GN=KCMF1 PE=4 SV=2
tr|E2RIA8|E2RIA8_CANLF	Ribosomal protein L8 OS=Canis lupus familiaris OX=9615 GN=RPL8 PE=3 SV=1
tr|L7N0F0|L7N0F0_CANLF	Uncharacterized protein OS=Canis lupus familiaris OX=9615 GN=SRPX PE=4 SV=1
tr|E2RDX1|E2RDX1_CANLF	Rab interacting lysosomal protein like 1 OS=Canis lupus familiaris OX=9615 GN=RILPL1 PE=4 SV=1
tr|F6XST9|F6XST9_CANLF	Hexosyltransferase OS=Canis lupus familiaris OX=9615 GN=OBSL1 PE=3 SV=1
tr|E2R446|E2R446_CANLF	Coiled-coil domain containing 91 OS=Canis lupus familiaris OX=9615 GN=CCDC91 PE=4 SV=2
tr|F6Y8P9|F6Y8P9_CANLF	MICOS complex subunit MIC60 OS=Canis lupus familiaris OX=9615 GN=IMMT PE=3 SV=1
tr|F1PK90|F1PK90_CANLF	DEAD-box helicase 46 OS=Canis lupus familiaris OX=9615 GN=DDX46 PE=4 SV=2
tr|F1PV40|F1PV40_CANLF	Uncharacterized protein OS=Canis lupus familiaris OX=9615 GN=ISY1 PE=4 SV=2
tr|J9P2W5|J9P2W5_CANLF	Gem nuclear organelle associated protein 5 OS=Canis lupus familiaris OX=9615 GN=GEMIN5 PE=4 SV=1
tr|E7AIM4|E7AIM4_CANLF	Disintegrin and metalloproteinase domain 9,transcript variant 2 OS=Canis lupus familiaris OX=9615 GN=adam9 PE=2 SV=1
tr|E2RQL3|E2RQL3_CANLF	Synapse associated protein 1 OS=Canis lupus familiaris OX=9615 GN=SYAP1 PE=4 SV=1
tr|E2RIQ8|E2RIQ8_CANLF	Ribosomal protein S5 OS=Canis lupus familiaris OX=9615 GN=RPS5 PE=3 SV=1
tr|F1PL90|F1PL90_CANLF	1-phosphatidylinositol 4,5-bisphosphate phosphodiesterase OS=Canis lupus familiaris OX=9615 GN=PLCB1 PE=4 SV=2
tr|G1K296|G1K296_CANLF	ATP-dependent 6-phosphofructokinase OS=Canis lupus familiaris OX=9615 GN=PFKM PE=2 SV=1
tr|J9NZT4|J9NZT4_CANLF	N(alpha)-acetyltransferase 15, NatA auxiliary subunit OS=Canis lupus familiaris OX=9615 GN=NAA15 PE=4 SV=1
tr|F1PAY5|F1PAY5_CANLF	Mothers against decapentaplegic homolog OS=Canis lupus familiaris OX=9615 GN=SMAD4 PE=3 SV=2
tr|J9P2F4|J9P2F4_CANLF	Kazal type serine peptidase inhibitor domain 1 OS=Canis lupus familiaris OX=9615 GN=KAZALD1 PE=4 SV=1
sp|O02812|MK14_CANLF	Mitogen-activated protein kinase 14 OS=Canis lupus familiaris OX=9615 GN=MAPK14 PE=2 SV=3
tr|E2RFB4|E2RFB4_CANLF	Protein phosphatase, Mg2+/Mn2+ dependent 1G OS=Canis lupus familiaris OX=9615 GN=PPM1G PE=3 SV=2
tr|E2QUE2|E2QUE2_CANLF	tRNA methyltransferase 1 OS=Canis lupus familiaris OX=9615 GN=TRMT1 PE=3 SV=2
tr|J9P7M4|J9P7M4_CANLF	Peptidyl-prolyl cis-trans isomerase OS=Canis lupus familiaris OX=9615 PE=3 SV=1
tr|J9P4U1|J9P4U1_CANLF	Striatin 3 OS=Canis lupus familiaris OX=9615 GN=STRN3 PE=4 SV=1
tr|J9P9D1|J9P9D1_CANLF	Syndecan OS=Canis lupus familiaris OX=9615 GN=SDC2 PE=3 SV=1
tr|F1PUK8|F1PUK8_CANLF	MINDY lysine 48 deubiquitinase 1 OS=Canis lupus familiaris OX=9615 GN=MINDY1 PE=4 SV=2
tr|F1PJV5|F1PJV5_CANLF	Adenosine kinase OS=Canis lupus familiaris OX=9615 GN=ADK PE=4 SV=2
tr|E2RRW9|E2RRW9_CANLF	Alpha-galactosidase OS=Canis lupus familiaris OX=9615 GN=NAGA PE=3 SV=2
tr|F1PU84|F1PU84_CANLF	Pterin-4 alpha-carbinolamine dehydratase 1 OS=Canis lupus familiaris OX=9615 GN=PCBD1 PE=3 SV=2
tr|E2RNM4|E2RNM4_CANLF	ArfGAP with FG repeats 1 OS=Canis lupus familiaris OX=9615 GN=AGFG1 PE=4 SV=2
tr|E2R1C9|E2R1C9_CANLF	Tropomodulin 2 OS=Canis lupus familiaris OX=9615 GN=TMOD2 PE=4 SV=2
tr|E2RL65|E2RL65_CANLF	Splicing factor 3b subunit 2 OS=Canis lupus familiaris OX=9615 GN=SF3B2 PE=4 SV=2
tr|F1PME4|F1PME4_CANLF	DnaJ heat shock protein family (Hsp40) member C3 OS=Canis lupus familiaris OX=9615 GN=DNAJC3 PE=4 SV=2
tr|E2RHN1|E2RHN1_CANLF	Granulin precursor OS=Canis lupus familiaris OX=9615 GN=GRN PE=4 SV=2
tr|F1P719|F1P719_CANLF	EH domain containing 4 OS=Canis lupus familiaris OX=9615 GN=EHD4 PE=3 SV=2
tr|F1PX32|F1PX32_CANLF	1,4-alpha-glucan branching enzyme 1 OS=Canis lupus familiaris OX=9615 GN=GBE1 PE=4 SV=2
tr|F6UQU0|F6UQU0_CANLF	SRSF protein kinase 2 OS=Canis lupus familiaris OX=9615 GN=SRPK2 PE=4 SV=1
tr|E2R3Y5|E2R3Y5_CANLF	AMP deaminase OS=Canis lupus familiaris OX=9615 GN=AMPD2 PE=3 SV=1
tr|E2RTE4|E2RTE4_CANLF	F-box and WD repeat domain containing 11 OS=Canis lupus familiaris OX=9615 GN=FBXW11 PE=4 SV=2
tr|F1PAZ6|F1PAZ6_CANLF	Enoyl-CoA hydratase, short chain 1 OS=Canis lupus familiaris OX=9615 GN=ECHS1 PE=3 SV=2
tr|J9NST3|J9NST3_CANLF	Importin subunit alpha OS=Canis lupus familiaris OX=9615 GN=KPNA6 PE=3 SV=1
tr|E2RIL1|E2RIL1_CANLF	Spectrin repeat containing nuclear envelope family member 3 OS=Canis lupus familiaris OX=9615 GN=SYNE3 PE=4 SV=2
tr|F1PID0|F1PID0_CANLF	Nuclear receptor binding protein 2 OS=Canis lupus familiaris OX=9615 GN=NRBP2 PE=4 SV=2
tr|F1P835|F1P835_CANLF	Polypeptide N-acetylgalactosaminyltransferase OS=Canis lupus familiaris OX=9615 GN=GALNT2 PE=3 SV=2
tr|E2R4R8|E2R4R8_CANLF	Peptidase M20 domain-containing protein 2 OS=Canis lupus familiaris OX=9615 GN=PM20D2 PE=3 SV=2
tr|J9JHE4|J9JHE4_CANLF	Tripeptidyl peptidase 2 OS=Canis lupus familiaris OX=9615 GN=TPP2 PE=4 SV=1
tr|F1PJ81|F1PJ81_CANLF	MINDY lysine 48 deubiquitinase 3 OS=Canis lupus familiaris OX=9615 GN=MINDY3 PE=4 SV=2
tr|F1PEZ0|F1PEZ0_CANLF	Serine and arginine rich splicing factor 4 OS=Canis lupus familiaris OX=9615 GN=SRSF4 PE=4 SV=2
tr|E2RM91|E2RM91_CANLF	Cbl proto-oncogene B OS=Canis lupus familiaris OX=9615 GN=CBLB PE=4 SV=1
tr|F1PRR3|F1PRR3_CANLF	Hexamethylene bisacetamide inducible 1 OS=Canis lupus familiaris OX=9615 GN=HEXIM1 PE=4 SV=2
tr|F1PW85|F1PW85_CANLF	Yip1 interacting factor homolog B, membrane trafficking protein OS=Canis lupus familiaris OX=9615 GN=YIF1B PE=4 SV=2
tr|E2RJJ6|E2RJJ6_CANLF	Metalloendopeptidase OS=Canis lupus familiaris OX=9615 GN=BMP1 PE=4 SV=2
tr|E2RT18|E2RT18_CANLF	Oxysterol-binding protein OS=Canis lupus familiaris OX=9615 GN=OSBPL9 PE=3 SV=1
tr|E2RSS4|E2RSS4_CANLF	WAP, follistatin/kazal, immunoglobulin, kunitz and netrin domain containing 2 OS=Canis lupus familiaris OX=9615 GN=WFIKKN2 PE=4 SV=1
tr|E2RNT5|E2RNT5_CANLF	Inverted formin, FH2 and WH2 domain containing OS=Canis lupus familiaris OX=9615 GN=INF2 PE=4 SV=2
tr|A0A0A0MPE1|A0A0A0MPE1_CANLF	40S ribosomal protein S17 OS=Canis lupus familiaris OX=9615 GN=RPS17 PE=3 SV=1
tr|F1PDM3|F1PDM3_CANLF	SEC13 homolog, nuclear pore and COPII coat complex component OS=Canis lupus familiaris OX=9615 GN=SEC13 PE=3 SV=2
tr|E2QSB9|E2QSB9_CANLF	Microtubule-associated protein OS=Canis lupus familiaris OX=9615 GN=MAP2 PE=4 SV=1
tr|F1PV82|F1PV82_CANLF	Neural precursor cell expressed, developmentally down-regulated 4-like, E3 ubiquitin protein ligase OS=Canis lupus familiaris OX=9615 GN=NEDD4L PE=4 SV=2
tr|E2RDF9|E2RDF9_CANLF	Heterochromatin protein 1 binding protein 3 OS=Canis lupus familiaris OX=9615 GN=HP1BP3 PE=4 SV=1
tr|J9P746|J9P746_CANLF	Sterol carrier protein 2 OS=Canis lupus familiaris OX=9615 GN=SCP2 PE=3 SV=1
tr|F1PS11|F1PS11_CANLF	Phospholipase B-like OS=Canis lupus familiaris OX=9615 GN=PLBD2 PE=3 SV=2
tr|F1PJA8|F1PJA8_CANLF	Transcription factor like 5 OS=Canis lupus familiaris OX=9615 GN=TCFL5 PE=4 SV=2
tr|F1Q260|F1Q260_CANLF	Lysosomal associated membrane protein 1 OS=Canis lupus familiaris OX=9615 GN=LAMP1 PE=3 SV=2
tr|F1PGP3|F1PGP3_CANLF	Family with sequence similarity 3 member C OS=Canis lupus familiaris OX=9615 GN=FAM3C PE=4 SV=2
tr|E2R832|E2R832_CANLF	Phosphomannomutase OS=Canis lupus familiaris OX=9615 GN=PMM2 PE=3 SV=2
tr|E2RA41|E2RA41_CANLF	TIA1 cytotoxic granule associated RNA binding protein like 1 OS=Canis lupus familiaris OX=9615 GN=TIAL1 PE=4 SV=1
tr|J9NZU7|J9NZU7_CANLF	Peptidyl-prolyl cis-trans isomerase OS=Canis lupus familiaris OX=9615 PE=4 SV=1
tr|E2RER1|E2RER1_CANLF	Uncharacterized protein OS=Canis lupus familiaris OX=9615 PE=4 SV=2
tr|E2REF0|E2REF0_CANLF	SWI/SNF related, matrix associated, actin dependent regulator of chromatin subfamily c member 1 OS=Canis lupus familiaris OX=9615 GN=SMARCC1 PE=4 SV=1
tr|F1Q147|F1Q147_CANLF	Myosin IC OS=Canis lupus familiaris OX=9615 GN=MYO1C PE=3 SV=2
tr|F1P9S5|F1P9S5_CANLF	Plexin B2 OS=Canis lupus familiaris OX=9615 GN=PLXNB2 PE=4 SV=2
tr|E2R8D6|E2R8D6_CANLF	Heterogeneous nuclear ribonucleoprotein H1 OS=Canis lupus familiaris OX=9615 GN=HNRNPH1 PE=4 SV=2
tr|F1Q2J7|F1Q2J7_CANLF	Acyl-CoA binding domain containing 3 OS=Canis lupus familiaris OX=9615 GN=ACBD3 PE=4 SV=2
tr|F1PVP9|F1PVP9_CANLF	RAB1B, member RAS oncogene family OS=Canis lupus familiaris OX=9615 GN=RAB1B PE=4 SV=2
tr|E2RQE3|E2RQE3_CANLF	Proline rich coiled-coil 2A OS=Canis lupus familiaris OX=9615 GN=PRRC2A PE=4 SV=2
tr|E2QX06|E2QX06_CANLF	Transketolase like 1 OS=Canis lupus familiaris OX=9615 GN=TKTL1 PE=4 SV=1
tr|F1PEQ7|F1PEQ7_CANLF	Uncharacterized protein OS=Canis lupus familiaris OX=9615 GN=XRCC1 PE=4 SV=2
tr|E2RFA1|E2RFA1_CANLF	Ring finger protein 214 OS=Canis lupus familiaris OX=9615 GN=RNF214 PE=4 SV=2
tr|E2RS94|E2RS94_CANLF	Coiled-coil domain containing 65 OS=Canis lupus familiaris OX=9615 GN=CCDC65 PE=4 SV=1
tr|J9NXN1|J9NXN1_CANLF	Coiled-coil domain containing 153 OS=Canis lupus familiaris OX=9615 GN=CCDC153 PE=4 SV=1
tr|J9NX67|J9NX67_CANLF	Platelet derived growth factor subunit A OS=Canis lupus familiaris OX=9615 GN=PDGFA PE=3 SV=1
tr|F1PKP5|F1PKP5_CANLF	WD repeat domain 37 OS=Canis lupus familiaris OX=9615 GN=WDR37 PE=4 SV=2
tr|F1PU09|F1PU09_CANLF	Atlastin GTPase 3 OS=Canis lupus familiaris OX=9615 GN=ATL3 PE=4 SV=2
tr|F1PJM7|F1PJM7_CANLF	GIT ArfGAP 1 OS=Canis lupus familiaris OX=9615 GN=GIT1 PE=4 SV=1
tr|F6UTB0|F6UTB0_CANLF	G protein nucleolar 3 OS=Canis lupus familiaris OX=9615 GN=GNL3 PE=4 SV=1
tr|E2RGR3|E2RGR3_CANLF	Stromal antigen 2 OS=Canis lupus familiaris OX=9615 GN=STAG2 PE=4 SV=2
tr|E2R8Q3|E2R8Q3_CANLF	GIT ArfGAP 2 OS=Canis lupus familiaris OX=9615 GN=GIT2 PE=4 SV=2
tr|J9P5S0|J9P5S0_CANLF	Ferritin OS=Canis lupus familiaris OX=9615 PE=3 SV=1
tr|E2RPH7|E2RPH7_CANLF	Extracellular matrix protein 2 OS=Canis lupus familiaris OX=9615 GN=ECM2 PE=4 SV=2
tr|F1Q1X9|F1Q1X9_CANLF	Succinate dehydrogenase [ubiquinone] flavoprotein subunit, mitochondrial OS=Canis lupus familiaris OX=9615 GN=SDHA PE=3 SV=2
tr|J9NTH2|J9NTH2_CANLF	Ankyrin 2 OS=Canis lupus familiaris OX=9615 GN=ANK2 PE=4 SV=1
tr|E2QXN9|E2QXN9_CANLF	Cystathionine beta-synthase OS=Canis lupus familiaris OX=9615 PE=3 SV=2
tr|F6UV54|F6UV54_CANLF	Nucleoporin 54 OS=Canis lupus familiaris OX=9615 GN=NUP54 PE=4 SV=1
tr|E2RCZ7|E2RCZ7_CANLF	Core histone macro-H2A OS=Canis lupus familiaris OX=9615 GN=H2AFY PE=4 SV=1
tr|E2R2U3|E2R2U3_CANLF	DEAH-box helicase 15 OS=Canis lupus familiaris OX=9615 GN=DHX15 PE=4 SV=1
tr|E2R057|E2R057_CANLF	ADP ribosylation factor interacting protein 1 OS=Canis lupus familiaris OX=9615 GN=ARFIP1 PE=4 SV=2
tr|E2RJW5|E2RJW5_CANLF	Inositol-3-phosphate synthase 1 OS=Canis lupus familiaris OX=9615 GN=ISYNA1 PE=4 SV=2
tr|E2RRM0|E2RRM0_CANLF	Upstream binding transcription factor OS=Canis lupus familiaris OX=9615 GN=UBTF PE=4 SV=2
tr|E2R836|E2R836_CANLF	Uncharacterized protein OS=Canis lupus familiaris OX=9615 GN=WASHC3 PE=4 SV=1
tr|E2RNT3|E2RNT3_CANLF	DExH-box helicase 9 OS=Canis lupus familiaris OX=9615 GN=DHX9 PE=4 SV=1
tr|E2RKN0|E2RKN0_CANLF	Uncharacterized protein OS=Canis lupus familiaris OX=9615 GN=ARHGEF18 PE=4 SV=2
tr|F1Q4G4|F1Q4G4_CANLF	Peptidylglycine alpha-amidating monooxygenase OS=Canis lupus familiaris OX=9615 GN=PAM PE=4 SV=1
tr|J9PAI9|J9PAI9_CANLF	Leucine rich repeat neuronal 2 OS=Canis lupus familiaris OX=9615 GN=LRRN2 PE=4 SV=1
tr|E2RP05|E2RP05_CANLF	40S ribosomal protein S6 OS=Canis lupus familiaris OX=9615 GN=RPS6 PE=3 SV=1
tr|E2QVN6|E2QVN6_CANLF	Transcription elongation factor A1 OS=Canis lupus familiaris OX=9615 GN=TCEA1 PE=4 SV=1
tr|J9NTV5|J9NTV5_CANLF	DDB1 and CUL4 associated factor 1 OS=Canis lupus familiaris OX=9615 GN=DCAF1 PE=4 SV=1
tr|F1PAD0|F1PAD0_CANLF	Eukaryotic translation initiation factor 2B subunit delta OS=Canis lupus familiaris OX=9615 GN=EIF2B4 PE=3 SV=2
tr|F1PFK6|F1PFK6_CANLF	Importin subunit alpha OS=Canis lupus familiaris OX=9615 GN=KPNA1 PE=3 SV=2
tr|E2QUB6|E2QUB6_CANLF	Epsin 3 OS=Canis lupus familiaris OX=9615 GN=EPN3 PE=4 SV=1
tr|J9P9G9|J9P9G9_CANLF	Uncharacterized protein OS=Canis lupus familiaris OX=9615 GN=MYCBP PE=4 SV=1
tr|E2QW79|E2QW79_CANLF	RAB11 binding and LisH domain, coiled-coil and HEAT repeat containing OS=Canis lupus familiaris OX=9615 GN=RELCH PE=4 SV=2
tr|E2QRV2|E2QRV2_CANLF	TAO kinase 1 OS=Canis lupus familiaris OX=9615 GN=TAOK1 PE=4 SV=1
tr|E2QRQ8|E2QRQ8_CANLF	Glutaminyl-tRNA synthetase OS=Canis lupus familiaris OX=9615 GN=QARS PE=3 SV=1
tr|E2R0Y4|E2R0Y4_CANLF	Cleavage and polyadenylation specific factor 7 OS=Canis lupus familiaris OX=9615 GN=CPSF7 PE=4 SV=2
tr|F1PRF8|F1PRF8_CANLF	Pyridoxal dependent decarboxylase domain containing 1 OS=Canis lupus familiaris OX=9615 GN=PDXDC1 PE=4 SV=2
tr|J9NXV9|J9NXV9_CANLF	BCAR1, Cas family scaffold protein OS=Canis lupus familiaris OX=9615 GN=BCAR1 PE=4 SV=1
tr|E2RNW6|E2RNW6_CANLF	WNK lysine deficient protein kinase 4 OS=Canis lupus familiaris OX=9615 GN=WNK4 PE=4 SV=2
tr|J9NZ82|J9NZ82_CANLF	MICAL like 1 OS=Canis lupus familiaris OX=9615 GN=MICALL1 PE=4 SV=1
tr|E2QUH1|E2QUH1_CANLF	Proline, glutamate and leucine rich protein 1 OS=Canis lupus familiaris OX=9615 GN=PELP1 PE=4 SV=2
tr|E2RFA3|E2RFA3_CANLF	RNA helicase OS=Canis lupus familiaris OX=9615 GN=DDX18 PE=3 SV=2
tr|E2REK5|E2REK5_CANLF	Transportin 3 OS=Canis lupus familiaris OX=9615 GN=TNPO3 PE=4 SV=2
tr|F1PW12|F1PW12_CANLF	Coproporphyrinogen oxidase OS=Canis lupus familiaris OX=9615 GN=CPOX PE=4 SV=2
tr|F1PHM4|F1PHM4_CANLF	Aminoadipate-semialdehyde dehydrogenase-phosphopantetheinyl transferase OS=Canis lupus familiaris OX=9615 GN=AASDHPPT PE=4 SV=2
tr|F1PDH7|F1PDH7_CANLF	U6 snRNA-associated Sm-like protein LSm4 OS=Canis lupus familiaris OX=9615 GN=LSM4 PE=3 SV=2
tr|E2R027|E2R027_CANLF	Caspase 7 OS=Canis lupus familiaris OX=9615 GN=CASP7 PE=3 SV=2
sp|P48300|FUCO_CANLF	Tissue alpha-L-fucosidase OS=Canis lupus familiaris OX=9615 GN=FUCA1 PE=2 SV=1
tr|H9GWC5|H9GWC5_CANLF	WD repeat domain 45B OS=Canis lupus familiaris OX=9615 GN=WDR45B PE=4 SV=2
tr|F6V404|F6V404_CANLF	Ribulose-phosphate 3-epimerase OS=Canis lupus familiaris OX=9615 GN=RPE PE=3 SV=1
tr|F1PBG7|F1PBG7_CANLF	Sorting nexin OS=Canis lupus familiaris OX=9615 GN=SNX9 PE=3 SV=2
tr|E2R3V7|E2R3V7_CANLF	Mitochondrial antiviral signaling protein OS=Canis lupus familiaris OX=9615 GN=MAVS PE=4 SV=2
tr|E2RN50|E2RN50_CANLF	Signal transducing adaptor molecule OS=Canis lupus familiaris OX=9615 GN=STAM PE=4 SV=2
tr|F1PWP8|F1PWP8_CANLF	Uncharacterized protein OS=Canis lupus familiaris OX=9615 GN=LOC100856548 PE=4 SV=2
tr|J9NU72|J9NU72_CANLF	TP53 induced glycolysis regulatory phosphatase OS=Canis lupus familiaris OX=9615 GN=TIGAR PE=4 SV=1
tr|J9NTE9|J9NTE9_CANLF	Unc-80 homolog, NALCN channel complex subunit OS=Canis lupus familiaris OX=9615 GN=UNC80 PE=4 SV=1
tr|J9P266|J9P266_CANLF	Carbamoyl-phosphate synthetase 2, aspartate transcarbamylase, and dihydroorotase OS=Canis lupus familiaris OX=9615 GN=CAD PE=4 SV=1
tr|E2RCI5|E2RCI5_CANLF	Mtr4 exosome RNA helicase OS=Canis lupus familiaris OX=9615 GN=MTREX PE=4 SV=2
tr|Q32KH1|Q32KH1_CANLF	Extracellular sulfatase OS=Canis lupus familiaris OX=9615 GN=SULF2 PE=2 SV=1
tr|J9NWW5|J9NWW5_CANLF	Diacylglycerol kinase OS=Canis lupus familiaris OX=9615 GN=DGKG PE=3 SV=1
tr|E2QX86|E2QX86_CANLF	SWI/SNF related, matrix associated, actin dependent regulator of chromatin, subfamily e, member 1 OS=Canis lupus familiaris OX=9615 GN=SMARCE1 PE=4 SV=2
tr|J9PBM0|J9PBM0_CANLF	MCF.2 cell line derived transforming sequence OS=Canis lupus familiaris OX=9615 GN=MCF2 PE=4 SV=1
tr|E2R0J2|E2R0J2_CANLF	TCDD inducible poly(ADP-ribose) polymerase OS=Canis lupus familiaris OX=9615 GN=TIPARP PE=4 SV=1
tr|F6XEL1|F6XEL1_CANLF	THO complex 7 OS=Canis lupus familiaris OX=9615 GN=THOC7 PE=4 SV=1
sp|Q9XT54|PDE6D_CANLF	Retinal rod rhodopsin-sensitive cGMP 3',5'-cyclic phosphodiesterase subunit delta OS=Canis lupus familiaris OX=9615 GN=PDE6D PE=2 SV=1
tr|J9PAF0|J9PAF0_CANLF	Peptidylprolyl isomerase OS=Canis lupus familiaris OX=9615 GN=FKBP7 PE=4 SV=1
tr|J9P894|J9P894_CANLF	dCMP deaminase OS=Canis lupus familiaris OX=9615 GN=DCTD PE=4 SV=1
tr|E2R755|E2R755_CANLF	Retinoic acid receptor responder 2 OS=Canis lupus familiaris OX=9615 GN=RARRES2 PE=4 SV=1
tr|E2RJH3|E2RJH3_CANLF	Ubiquitin conjugating enzyme E2 H OS=Canis lupus familiaris OX=9615 GN=UBE2H PE=3 SV=2
tr|F1PIL5|F1PIL5_CANLF	Calsequestrin OS=Canis lupus familiaris OX=9615 GN=CASQ1 PE=3 SV=2
tr|E2RMW3|E2RMW3_CANLF	Uncharacterized protein OS=Canis lupus familiaris OX=9615 GN=BUD31 PE=4 SV=1
tr|A0A0A0MPC5|A0A0A0MPC5_CANLF	Trafficking protein particle complex subunit 2 OS=Canis lupus familiaris OX=9615 GN=TRAPPC2 PE=4 SV=1
tr|J9P9R6|J9P9R6_CANLF	Stromal cell derived factor 2 OS=Canis lupus familiaris OX=9615 GN=SDF2 PE=4 SV=1
tr|F1P9Z4|F1P9Z4_CANLF	RAS related 2 OS=Canis lupus familiaris OX=9615 GN=RRAS2 PE=4 SV=2
tr|J9P556|J9P556_CANLF	NADH dehydrogenase [ubiquinone] iron-sulfur protein 6, mitochondrial OS=Canis lupus familiaris OX=9615 GN=NDUFS6 PE=3 SV=1
tr|J9NXZ3|J9NXZ3_CANLF	Uncharacterized protein OS=Canis lupus familiaris OX=9615 PE=4 SV=1
tr|F1Q3I5|F1Q3I5_CANLF	Collagen alpha-1(I) chain OS=Canis lupus familiaris OX=9615 GN=COL1A1 PE=4 SV=2
tr|Z4YHI2|Z4YHI2_CANLF	Actin gamma 1 OS=Canis lupus familiaris OX=9615 GN=ACTG1 PE=3 SV=1
tr|J9NSQ6|J9NSQ6_CANLF	Heparan sulfate proteoglycan 2 OS=Canis lupus familiaris OX=9615 GN=HSPG2 PE=4 SV=1
tr|J9P2J8|J9P2J8_CANLF	Caldesmon 1 OS=Canis lupus familiaris OX=9615 GN=CALD1 PE=4 SV=1
tr|J9NWY1|J9NWY1_CANLF	Uncharacterized protein OS=Canis lupus familiaris OX=9615 PE=3 SV=1
tr|F1P6H7|F1P6H7_CANLF	Fibronectin OS=Canis lupus familiaris OX=9615 GN=FN1 PE=4 SV=2
tr|E2RHY7|E2RHY7_CANLF	Serpin family H member 1 OS=Canis lupus familiaris OX=9615 GN=SERPINH1 PE=1 SV=1
tr|F1PVC1|F1PVC1_CANLF	Actin, alpha 1, skeletal muscle OS=Canis lupus familiaris OX=9615 GN=ACTA1 PE=3 SV=2
tr|F1PDX9|F1PDX9_CANLF	T-complex protein 1 subunit gamma OS=Canis lupus familiaris OX=9615 GN=CCT3 PE=3 SV=2
tr|F1PYE3|F1PYE3_CANLF	Canine mammary tumor OS=Canis lupus familiaris OX=9615 GN=HSPB1 PE=2 SV=1
tr|J9NT18|J9NT18_CANLF	L-lactate dehydrogenase OS=Canis lupus familiaris OX=9615 PE=3 SV=1
tr|F1PQ43|F1PQ43_CANLF	Acidic leucine-rich nuclear phosphoprotein 32 family member A OS=Canis lupus familiaris OX=9615 GN=ANP32A PE=4 SV=2
sp|P62490|RB11A_CANLF	Ras-related protein Rab-11A OS=Canis lupus familiaris OX=9615 GN=RAB11A PE=2 SV=3
tr|E2RTI3|E2RTI3_CANLF	Ubiquilin 2 OS=Canis lupus familiaris OX=9615 GN=UBQLN2 PE=4 SV=1
tr|E2RIH2|E2RIH2_CANLF	Calcium binding protein 39 like OS=Canis lupus familiaris OX=9615 GN=CAB39L PE=4 SV=2
tr|F2Z4P5|F2Z4P5_CANLF	Serine/threonine-protein phosphatase OS=Canis lupus familiaris OX=9615 GN=PPP3CA PE=3 SV=1
tr|E2RR27|E2RR27_CANLF	Cytochrome b-c1 complex subunit 6 OS=Canis lupus familiaris OX=9615 GN=UQCRH PE=3 SV=1
tr|F1PHI1|F1PHI1_CANLF	RIC8 guanine nucleotide exchange factor B OS=Canis lupus familiaris OX=9615 GN=RIC8B PE=4 SV=2
tr|J9PBI4|J9PBI4_CANLF	Ubiquitin specific peptidase 15 OS=Canis lupus familiaris OX=9615 GN=USP15 PE=3 SV=1
tr|F1PEQ5|F1PEQ5_CANLF	Insulin like growth factor binding protein 5 OS=Canis lupus familiaris OX=9615 GN=IGFBP5 PE=4 SV=2
tr|E2R5B9|E2R5B9_CANLF	Glutathione S-transferase OS=Canis lupus familiaris OX=9615 GN=GSTM3 PE=3 SV=1
tr|F1PK00|F1PK00_CANLF	Uncharacterized protein OS=Canis lupus familiaris OX=9615 GN=SIRPA PE=4 SV=2
tr|F1PYM4|F1PYM4_CANLF	Insulin like growth factor binding protein acid labile subunit OS=Canis lupus familiaris OX=9615 GN=IGFALS PE=4 SV=2
tr|E2RFL0|E2RFL0_CANLF	ETHE1, persulfide dioxygenase OS=Canis lupus familiaris OX=9615 GN=ETHE1 PE=4 SV=1
tr|E2RQ74|E2RQ74_CANLF	Exosome component 9 OS=Canis lupus familiaris OX=9615 GN=EXOSC9 PE=4 SV=2
tr|F1PR95|F1PR95_CANLF	Complement C1q binding protein OS=Canis lupus familiaris OX=9615 GN=C1QBP PE=4 SV=2
tr|E2R7K6|E2R7K6_CANLF	Uncharacterized protein OS=Canis lupus familiaris OX=9615 GN=VPS33A PE=3 SV=2
tr|E2R7S6|E2R7S6_CANLF	U6 snRNA-associated Sm-like protein LSm1 OS=Canis lupus familiaris OX=9615 GN=LSM1 PE=3 SV=1
tr|J9NSF9|J9NSF9_CANLF	Prothrombin OS=Canis lupus familiaris OX=9615 GN=F2 PE=3 SV=1
tr|E2RFD6|E2RFD6_CANLF	DnaJ heat shock protein family (Hsp40) member C9 OS=Canis lupus familiaris OX=9615 GN=DNAJC9 PE=4 SV=2
tr|E2QWE3|E2QWE3_CANLF	Hepatocyte growth factor-regulated tyrosine kinase substrate OS=Canis lupus familiaris OX=9615 GN=HGS PE=4 SV=2
tr|E2RM54|E2RM54_CANLF	Polypeptide N-acetylgalactosaminyltransferase OS=Canis lupus familiaris OX=9615 GN=GALNT1 PE=3 SV=2
tr|F6XRK3|F6XRK3_CANLF	Uncharacterized protein OS=Canis lupus familiaris OX=9615 GN=DKC1 PE=4 SV=1
tr|E2RFR0|E2RFR0_CANLF	40S ribosomal protein S8 OS=Canis lupus familiaris OX=9615 GN=RPS8 PE=3 SV=1
tr|E2QWC1|E2QWC1_CANLF	Thiamine pyrophosphokinase OS=Canis lupus familiaris OX=9615 GN=TPK1 PE=3 SV=2
tr|F6XLD3|F6XLD3_CANLF	FAM20C, golgi associated secretory pathway kinase OS=Canis lupus familiaris OX=9615 GN=FAM20C PE=4 SV=1
tr|E2RPD3|E2RPD3_CANLF	Amyloid beta precursor protein binding family B member 1 interacting protein OS=Canis lupus familiaris OX=9615 GN=APBB1IP PE=4 SV=2
tr|E2QYI2|E2QYI2_CANLF	NECAP endocytosis associated 2 OS=Canis lupus familiaris OX=9615 GN=NECAP2 PE=4 SV=2
tr|I6Q2X5|I6Q2X5_CANLF	Cyclin-dependent kinase inhibitor 2A OS=Canis lupus familiaris OX=9615 GN=CDKN2A PE=2 SV=1
tr|F1PLP6|F1PLP6_CANLF	SIL1 nucleotide exchange factor OS=Canis lupus familiaris OX=9615 GN=SIL1 PE=4 SV=2
tr|E2REH5|E2REH5_CANLF	Acetyl-CoA acyltransferase 1 OS=Canis lupus familiaris OX=9615 GN=ACAA1 PE=3 SV=1
tr|F6V0P6|F6V0P6_CANLF	Uncharacterized protein OS=Canis lupus familiaris OX=9615 GN=MAP1LC3B PE=3 SV=1
tr|J9JHK6|J9JHK6_CANLF	SEC24 homolog C, COPII coat complex component OS=Canis lupus familiaris OX=9615 GN=SEC24C PE=4 SV=1
tr|F1PFF6|F1PFF6_CANLF	Actin filament associated protein 1 OS=Canis lupus familiaris OX=9615 GN=AFAP1 PE=4 SV=2
tr|E2RND5|E2RND5_CANLF	Peroxisomal biogenesis factor 5 OS=Canis lupus familiaris OX=9615 GN=PEX5 PE=4 SV=1
tr|E2QT97|E2QT97_CANLF	Chromobox 1 OS=Canis lupus familiaris OX=9615 GN=CBX1 PE=4 SV=1
tr|E2RAZ6|E2RAZ6_CANLF	GrpE protein homolog OS=Canis lupus familiaris OX=9615 GN=GRPEL1 PE=3 SV=2
tr|F1PZF4|F1PZF4_CANLF	Glutaminyl-peptide cyclotransferase OS=Canis lupus familiaris OX=9615 GN=QPCT PE=4 SV=1
tr|E2RIM3|E2RIM3_CANLF	Exosome component 4 OS=Canis lupus familiaris OX=9615 GN=EXOSC4 PE=4 SV=1
tr|F6UT62|F6UT62_CANLF	Sorting nexin 3 OS=Canis lupus familiaris OX=9615 GN=SNX3 PE=4 SV=1
tr|J9PAU4|J9PAU4_CANLF	Sterile alpha motif domain containing 9 like OS=Canis lupus familiaris OX=9615 GN=SAMD9L PE=4 SV=1
tr|J9P4N8|J9P4N8_CANLF	Transcription elongation regulator 1 OS=Canis lupus familiaris OX=9615 GN=TCERG1 PE=4 SV=1
tr|F1PTE0|F1PTE0_CANLF	Serine and arginine rich splicing factor 6 OS=Canis lupus familiaris OX=9615 GN=SRSF6 PE=4 SV=2
tr|F1PV78|F1PV78_CANLF	ADAM metallopeptidase domain 19 OS=Canis lupus familiaris OX=9615 GN=ADAM19 PE=4 SV=2
tr|J9NYR5|J9NYR5_CANLF	Sarcoglycan epsilon OS=Canis lupus familiaris OX=9615 GN=SGCE PE=4 SV=1
tr|F1PWK3|F1PWK3_CANLF	Prolylcarboxypeptidase OS=Canis lupus familiaris OX=9615 GN=PRCP PE=4 SV=2
tr|F1PQ09|F1PQ09_CANLF	Mediator of RNA polymerase II transcription subunit 4 OS=Canis lupus familiaris OX=9615 GN=MED4 PE=3 SV=2
tr|E2RJT2|E2RJT2_CANLF	Bone marrow stromal cell antigen 1 OS=Canis lupus familiaris OX=9615 GN=BST1 PE=4 SV=2
tr|E2RDT8|E2RDT8_CANLF	Thioredoxin 2 OS=Canis lupus familiaris OX=9615 GN=TXN2 PE=4 SV=2
tr|Q32KH4|Q32KH4_CANLF	Glucosamine (N-acetyl)-6-sulfatase (Fragment) OS=Canis lupus familiaris OX=9615 GN=gns PE=2 SV=1
tr|J9PB25|J9PB25_CANLF	Coiled-coil domain containing 126 OS=Canis lupus familiaris OX=9615 GN=CCDC126 PE=4 SV=1
tr|E2RL11|E2RL11_CANLF	Nuclear receptor coactivator 5 OS=Canis lupus familiaris OX=9615 GN=NCOA5 PE=4 SV=1
tr|E2QXM7|E2QXM7_CANLF	E3 ubiquitin-protein ligase OS=Canis lupus familiaris OX=9615 GN=ITCH PE=4 SV=2
tr|E2RGJ1|E2RGJ1_CANLF	Methylphosphate capping enzyme OS=Canis lupus familiaris OX=9615 GN=MEPCE PE=4 SV=2
tr|F1PKX2|F1PKX2_CANLF	ABI family member 3 binding protein OS=Canis lupus familiaris OX=9615 GN=ABI3BP PE=4 SV=2
tr|E2RJW9|E2RJW9_CANLF	Adducin 1 OS=Canis lupus familiaris OX=9615 GN=ADD1 PE=4 SV=2
tr|E2QZE7|E2QZE7_CANLF	Adducin 3 OS=Canis lupus familiaris OX=9615 GN=ADD3 PE=4 SV=1
tr|E2R886|E2R886_CANLF	Kininogen 1 OS=Canis lupus familiaris OX=9615 GN=KNG1 PE=4 SV=2
tr|F1Q156|F1Q156_CANLF	Uncharacterized protein OS=Canis lupus familiaris OX=9615 GN=CETN2 PE=4 SV=2
tr|E2R2K4|E2R2K4_CANLF	Uncharacterized protein OS=Canis lupus familiaris OX=9615 GN=RAP1B PE=4 SV=1
tr|D3YJ60|D3YJ60_CANLF	Chitinase 3-like 1 OS=Canis lupus familiaris OX=9615 GN=CHI3L1 PE=2 SV=1
tr|F1Q330|F1Q330_CANLF	COMM domain-containing protein 1 OS=Canis lupus familiaris OX=9615 GN=COMMD1 PE=4 SV=2
tr|E2RSA1|E2RSA1_CANLF	TP53RK binding protein OS=Canis lupus familiaris OX=9615 GN=TPRKB PE=3 SV=1
tr|J9NZN0|J9NZN0_CANLF	Leucine zipper and CTNNBIP1 domain containing OS=Canis lupus familiaris OX=9615 GN=LZIC PE=4 SV=1
tr|F1PCV7|F1PCV7_CANLF	Late endosomal/lysosomal adaptor, MAPK and MTOR activator 4 OS=Canis lupus familiaris OX=9615 GN=LAMTOR4 PE=4 SV=2
tr|E2QWD1|E2QWD1_CANLF	Glutaredoxin OS=Canis lupus familiaris OX=9615 GN=GLRX PE=4 SV=1
tr|F1PLV7|F1PLV7_CANLF	ATP binding cassette subfamily C member 8 OS=Canis lupus familiaris OX=9615 GN=ABCC8 PE=4 SV=2
tr|E2R0I8|E2R0I8_CANLF	Glucosylceramidase OS=Canis lupus familiaris OX=9615 GN=GBA PE=3 SV=1
tr|J9NW92|J9NW92_CANLF	N-acetylglucosamine-1-phosphate transferase subunit gamma OS=Canis lupus familiaris OX=9615 GN=GNPTG PE=4 SV=1
tr|E2R4Q2|E2R4Q2_CANLF	Syntaxin 7 OS=Canis lupus familiaris OX=9615 GN=STX7 PE=3 SV=2
tr|E2RMT0|E2RMT0_CANLF	Hydroxypyruvate isomerase (putative) OS=Canis lupus familiaris OX=9615 GN=HYI PE=4 SV=2
tr|E2RH80|E2RH80_CANLF	Platelet derived growth factor receptor like OS=Canis lupus familiaris OX=9615 GN=PDGFRL PE=4 SV=1
tr|E2RDX0|E2RDX0_CANLF	Uncharacterized protein OS=Canis lupus familiaris OX=9615 PE=3 SV=2
tr|D7F604|D7F604_CANLF	Tumor necrosis factor superfamily member 12 OS=Canis lupus familiaris OX=9615 PE=2 SV=1
tr|J9NTG9|J9NTG9_CANLF	Eukaryotic translation initiation factor 3 subunit I OS=Canis lupus familiaris OX=9615 GN=EIF3I PE=3 SV=1
tr|F6X7N2|F6X7N2_CANLF	Chromosome 15 C1orf50 homolog OS=Canis lupus familiaris OX=9615 GN=C15H1orf50 PE=4 SV=1
tr|E2RN91|E2RN91_CANLF	V-type proton ATPase subunit F OS=Canis lupus familiaris OX=9615 GN=ATP6V1F PE=3 SV=1
tr|F6UN31|F6UN31_CANLF	Malignant T-cell-amplified sequence OS=Canis lupus familiaris OX=9615 GN=MCTS1 PE=3 SV=1
tr|F1PCT1|F1PCT1_CANLF	BRICK1, SCAR/WAVE actin nucleating complex subunit OS=Canis lupus familiaris OX=9615 GN=BRK1 PE=4 SV=2
tr|E2RP76|E2RP76_CANLF	Protein S100 OS=Canis lupus familiaris OX=9615 GN=S100A16 PE=3 SV=1
tr|J9PBB8|J9PBB8_CANLF	Proprotein convertase subtilisin/kexin type 5 OS=Canis lupus familiaris OX=9615 GN=PCSK5 PE=3 SV=1
tr|E2R5Q5|E2R5Q5_CANLF	FMR1 autosomal homolog 1 OS=Canis lupus familiaris OX=9615 GN=FXR1 PE=4 SV=2
tr|E2RH71|E2RH71_CANLF	Dynein cytoplasmic 1 light intermediate chain 1 OS=Canis lupus familiaris OX=9615 GN=DYNC1LI1 PE=4 SV=1
tr|E2RNA6|E2RNA6_CANLF	PEST proteolytic signal containing nuclear protein OS=Canis lupus familiaris OX=9615 GN=PCNP PE=4 SV=2
tr|E2RIW7|E2RIW7_CANLF	Small nuclear ribonucleoprotein Sm D1 OS=Canis lupus familiaris OX=9615 GN=SNRPD1 PE=3 SV=1
tr|E2QT82|E2QT82_CANLF	Proteasome inhibitor subunit 1 OS=Canis lupus familiaris OX=9615 GN=PSMF1 PE=4 SV=1
tr|J9P9X7|J9P9X7_CANLF	Uncharacterized protein OS=Canis lupus familiaris OX=9615 PE=4 SV=1
tr|J9NRG9|J9NRG9_CANLF	Out at first homolog OS=Canis lupus familiaris OX=9615 GN=OAF PE=4 SV=1
tr|E2RQR0|E2RQR0_CANLF	Uncharacterized protein OS=Canis lupus familiaris OX=9615 PE=4 SV=2
tr|E2R236|E2R236_CANLF	Translocase of inner mitochondrial membrane 10 OS=Canis lupus familiaris OX=9615 GN=TIMM10 PE=4 SV=1
tr|E2RJ75|E2RJ75_CANLF	WNT1 inducible signaling pathway protein 2 OS=Canis lupus familiaris OX=9615 GN=CCN5 PE=4 SV=2
tr|J9P8G8|J9P8G8_CANLF	Uncharacterized protein OS=Canis lupus familiaris OX=9615 PE=3 SV=1
tr|E2RPS8|E2RPS8_CANLF	RNA guanine-7 methyltransferase activating subunit OS=Canis lupus familiaris OX=9615 GN=RAMAC PE=4 SV=2
tr|E2QU97|E2QU97_CANLF	Enolase-phosphatase E1 OS=Canis lupus familiaris OX=9615 GN=ENOPH1 PE=3 SV=2
tr|J9P3N0|J9P3N0_CANLF	Mitotic spindle organizing protein 1 OS=Canis lupus familiaris OX=9615 GN=MZT1 PE=4 SV=1
tr|J9P093|J9P093_CANLF	Uncharacterized protein OS=Canis lupus familiaris OX=9615 GN=LOC606772 PE=4 SV=1
tr|J9NWC4|J9NWC4_CANLF	Multiple coagulation factor deficiency 2 OS=Canis lupus familiaris OX=9615 GN=MCFD2 PE=4 SV=1
tr|F1PSC3|F1PSC3_CANLF	Eukaryotic translation initiation factor 4E OS=Canis lupus familiaris OX=9615 GN=EIF4E PE=3 SV=1
tr|F6Y6V7|F6Y6V7_CANLF	Anaphase promoting complex subunit 13 OS=Canis lupus familiaris OX=9615 GN=ANAPC13 PE=4 SV=1
tr|F1PMH3|F1PMH3_CANLF	MRG domain binding protein OS=Canis lupus familiaris OX=9615 GN=MRGBP PE=4 SV=2
tr|F1PCV4|F1PCV4_CANLF	Protein phosphatase 1 regulatory inhibitor subunit 14B OS=Canis lupus familiaris OX=9615 GN=PPP1R14B PE=4 SV=2
tr|E2R7Q2|E2R7Q2_CANLF	Isoamyl acetate hydrolyzing esterase 1 (putative) OS=Canis lupus familiaris OX=9615 GN=IAH1 PE=4 SV=1
tr|E2R3V2|E2R3V2_CANLF	U6 snRNA-associated Sm-like protein LSm8 OS=Canis lupus familiaris OX=9615 GN=LSM8 PE=3 SV=2
tr|E2QUV7|E2QUV7_CANLF	Twisted gastrulation BMP signaling modulator 1 OS=Canis lupus familiaris OX=9615 GN=TWSG1 PE=4 SV=2
tr|J9P4N2|J9P4N2_CANLF	Uncharacterized protein OS=Canis lupus familiaris OX=9615 PE=4 SV=1
tr|E2QYJ4|E2QYJ4_CANLF	DNA-directed RNA polymerase subunit OS=Canis lupus familiaris OX=9615 GN=POLR2I PE=3 SV=1
tr|F1PMS8|F1PMS8_CANLF	Neural cell adhesion molecule 1 OS=Canis lupus familiaris OX=9615 GN=NCAM1 PE=4 SV=2
tr|F1PP26|F1PP26_CANLF	Family with sequence similarity 120A OS=Canis lupus familiaris OX=9615 GN=FAM120A PE=4 SV=2
tr|E2R0K8|E2R0K8_CANLF	TBC1 domain family member 22A OS=Canis lupus familiaris OX=9615 GN=TBC1D22A PE=4 SV=2
tr|E2RSU6|E2RSU6_CANLF	Endosulfine alpha OS=Canis lupus familiaris OX=9615 GN=ENSA PE=3 SV=1
tr|J9P1X5|J9P1X5_CANLF	GEM interacting protein OS=Canis lupus familiaris OX=9615 GN=GMIP PE=4 SV=1
tr|F1PQ68|F1PQ68_CANLF	Tubulin beta chain OS=Canis lupus familiaris OX=9615 GN=TUBB2A PE=3 SV=2
tr|J9P316|J9P316_CANLF	Uncharacterized protein OS=Canis lupus familiaris OX=9615 PE=4 SV=1
tr|E2RNC5|E2RNC5_CANLF	Uncharacterized protein OS=Canis lupus familiaris OX=9615 GN=EEF1E1 PE=4 SV=1
tr|E2R431|E2R431_CANLF	S-adenosylmethionine synthase OS=Canis lupus familiaris OX=9615 GN=MAT2A PE=3 SV=1
tr|F1PNW3|F1PNW3_CANLF	Uncharacterized protein OS=Canis lupus familiaris OX=9615 PE=4 SV=2
tr|F1Q1T5|F1Q1T5_CANLF	Ribosomal protein S15 OS=Canis lupus familiaris OX=9615 GN=RPS15 PE=3 SV=1
tr|F1PUD9|F1PUD9_CANLF	Uncharacterized protein OS=Canis lupus familiaris OX=9615 PE=4 SV=1
tr|F1PIE0|F1PIE0_CANLF	Contactin 5 OS=Canis lupus familiaris OX=9615 GN=CNTN5 PE=4 SV=2
tr|J9P558|J9P558_CANLF	Uncharacterized protein OS=Canis lupus familiaris OX=9615 PE=4 SV=1
tr|E2QYB6|E2QYB6_CANLF	ADP-ribosylarginine hydrolase OS=Canis lupus familiaris OX=9615 GN=ADPRH PE=4 SV=1
tr|F1PPZ7|F1PPZ7_CANLF	Uncharacterized protein OS=Canis lupus familiaris OX=9615 GN=AKR7A2 PE=4 SV=2
tr|G3DTQ2|G3DTQ2_CANLF	MHC class I antigen (Fragment) OS=Canis lupus familiaris OX=9615 GN=DLA-88 PE=2 SV=1
tr|J9NRV4|J9NRV4_CANLF	STIP1 homology and U-box containing protein 1 OS=Canis lupus familiaris OX=9615 GN=STUB1 PE=4 SV=1
tr|E2REA4|E2REA4_CANLF	Uncharacterized protein OS=Canis lupus familiaris OX=9615 GN=LOC479459 PE=3 SV=2
tr|E2QX53|E2QX53_CANLF	Glucosamine-6-phosphate isomerase OS=Canis lupus familiaris OX=9615 GN=GNPDA1 PE=3 SV=1
tr|F6XCI1|F6XCI1_CANLF	G3BP stress granule assembly factor 2 (Fragment) OS=Canis lupus familiaris OX=9615 GN=G3BP2 PE=4 SV=1
tr|F1PFC6|F1PFC6_CANLF	Small nuclear ribonucleoprotein polypeptide A OS=Canis lupus familiaris OX=9615 GN=SNRPA PE=4 SV=2
tr|F1PQC4|F1PQC4_CANLF	SHC adaptor protein 1 OS=Canis lupus familiaris OX=9615 GN=SHC1 PE=4 SV=2
tr|F6XMP7|F6XMP7_CANLF	Small glutamine rich tetratricopeptide repeat containing alpha OS=Canis lupus familiaris OX=9615 GN=SGTA PE=2 SV=1
tr|A0A140T8E2|A0A140T8E2_CANLF	ADM OS=Canis lupus familiaris OX=9615 GN=ADM PE=4 SV=1
tr|F1PSJ7|F1PSJ7_CANLF	LSM14A, mRNA processing body assembly factor OS=Canis lupus familiaris OX=9615 GN=LSM14A PE=4 SV=2
tr|F1P8B4|F1P8B4_CANLF	Calnexin OS=Canis lupus familiaris OX=9615 GN=CANX PE=3 SV=2
tr|J9P4R4|J9P4R4_CANLF	26S proteasome non-ATPase regulatory subunit 1 OS=Canis lupus familiaris OX=9615 GN=PSMD1 PE=3 SV=1
tr|J9NYJ8|J9NYJ8_CANLF	RAB6A, member RAS oncogene family OS=Canis lupus familiaris OX=9615 GN=RAB6A PE=4 SV=1
tr|F6X6W7|F6X6W7_CANLF	Leiomodin 1 OS=Canis lupus familiaris OX=9615 GN=LMOD1 PE=4 SV=1
tr|F1Q4C5|F1Q4C5_CANLF	EPH receptor A2 OS=Canis lupus familiaris OX=9615 GN=EPHA2 PE=2 SV=2
tr|E2R4R3|E2R4R3_CANLF	mRNA cap guanine-N7 methyltransferase OS=Canis lupus familiaris OX=9615 GN=RNMT PE=3 SV=1
tr|F1PYQ1|F1PYQ1_CANLF	Ras-related C3 botulinum toxin substrate 1 OS=Canis lupus familiaris OX=9615 GN=RAC1 PE=4 SV=2
tr|J9NSD0|J9NSD0_CANLF	Density-regulated protein OS=Canis lupus familiaris OX=9615 GN=DENR PE=3 SV=1
tr|E2RS49|E2RS49_CANLF	Uncharacterized protein OS=Canis lupus familiaris OX=9615 GN=RPS25 PE=4 SV=2
tr|K9J6N9|K9J6N9_CANLF	U1 small nuclear ribonucleoprotein C OS=Canis lupus familiaris OX=9615 GN=SNRPC PE=3 SV=1
tr|F1P9S0|F1P9S0_CANLF	CD2 cytoplasmic tail binding protein 2 OS=Canis lupus familiaris OX=9615 GN=CD2BP2 PE=4 SV=2
tr|F1PEW1|F1PEW1_CANLF	Far upstream element binding protein 3 OS=Canis lupus familiaris OX=9615 GN=FUBP3 PE=4 SV=2
tr|F1PEL5|F1PEL5_CANLF	Zinc finger CCCH-type containing 15 OS=Canis lupus familiaris OX=9615 GN=ZC3H15 PE=4 SV=2
tr|E2R149|E2R149_CANLF	Ribosomal protein L9 OS=Canis lupus familiaris OX=9615 GN=RPL9 PE=4 SV=1
tr|E2RMH8|E2RMH8_CANLF	ATR interacting protein OS=Canis lupus familiaris OX=9615 GN=ATRIP PE=4 SV=1
tr|J9NYH7|J9NYH7_CANLF	Adhesion G protein-coupled receptor G5 OS=Canis lupus familiaris OX=9615 GN=ADGRG5 PE=3 SV=1
tr|E2R3R8|E2R3R8_CANLF	Cyclin dependent kinase like 2 OS=Canis lupus familiaris OX=9615 GN=CDKL2 PE=4 SV=1
tr|F1PGV4|F1PGV4_CANLF	AXL receptor tyrosine kinase OS=Canis lupus familiaris OX=9615 GN=AXL PE=3 SV=2
tr|F1PVX5|F1PVX5_CANLF	SEL1L, ERAD E3 ligase adaptor subunit OS=Canis lupus familiaris OX=9615 GN=SEL1L PE=4 SV=2
tr|E2RBF0|E2RBF0_CANLF	Tissue factor pathway inhibitor OS=Canis lupus familiaris OX=9615 GN=TFPI2 PE=4 SV=2
tr|F1Q2H2|F1Q2H2_CANLF	Ubiquitin fold modifier 1 OS=Canis lupus familiaris OX=9615 GN=UFM1 PE=4 SV=2
tr|F1PQX4|F1PQX4_CANLF	Receptor interacting serine/threonine kinase 1 OS=Canis lupus familiaris OX=9615 GN=RIPK1 PE=4 SV=2
tr|E2RGI7|E2RGI7_CANLF	Arginine and glutamate rich 1 OS=Canis lupus familiaris OX=9615 GN=ARGLU1 PE=4 SV=2
tr|E2R498|E2R498_CANLF	Coiled-coil domain containing 88A OS=Canis lupus familiaris OX=9615 GN=CCDC88A PE=4 SV=2
tr|Q6UQF0|Q6UQF0_CANLF	High mobiliy group protein A1B OS=Canis lupus familiaris OX=9615 GN=HMGA1B PE=2 SV=1
tr|F1P7D3|F1P7D3_CANLF	Glutamate-cysteine ligase modifier subunit OS=Canis lupus familiaris OX=9615 GN=GCLM PE=4 SV=1
tr|E2R9V7|E2R9V7_CANLF	Uncharacterized protein OS=Canis lupus familiaris OX=9615 GN=CAECAM1 PE=4 SV=2
tr|E2RM78|E2RM78_CANLF	Immunoglobulin superfamily containing leucine rich repeat OS=Canis lupus familiaris OX=9615 GN=ISLR PE=4 SV=2
tr|F1PDS0|F1PDS0_CANLF	Poly(A) polymerase alpha OS=Canis lupus familiaris OX=9615 GN=PAPOLA PE=4 SV=2
tr|F1PLU9|F1PLU9_CANLF	Kelch domain containing 9 OS=Canis lupus familiaris OX=9615 GN=KLHDC9 PE=4 SV=2
sp|A0M8U6|TES_CANLF	Testin OS=Canis lupus familiaris OX=9615 GN=TES PE=3 SV=1
tr|E2R4J2|E2R4J2_CANLF	Thymopoietin OS=Canis lupus familiaris OX=9615 GN=TMPO PE=4 SV=1
tr|F1Q2Z4|F1Q2Z4_CANLF	Serine/arginine repetitive matrix 2 OS=Canis lupus familiaris OX=9615 GN=SRRM2 PE=4 SV=2
tr|E2RLM4|E2RLM4_CANLF	Cyclin dependent kinase 6 OS=Canis lupus familiaris OX=9615 GN=CDK6 PE=3 SV=1
tr|E2QXY5|E2QXY5_CANLF	Erythrocyte membrane protein band 4.1 like 1 OS=Canis lupus familiaris OX=9615 GN=EPB41L1 PE=4 SV=2
tr|F1PGS8|F1PGS8_CANLF	Uncharacterized protein OS=Canis lupus familiaris OX=9615 GN=LOC486100 PE=4 SV=1
tr|E2RDB1|E2RDB1_CANLF	Leucine zipper protein 1 OS=Canis lupus familiaris OX=9615 GN=LUZP1 PE=4 SV=1
tr|F1PND5|F1PND5_CANLF	Ankyrin repeat and sterile alpha motif domain containing 1A OS=Canis lupus familiaris OX=9615 GN=ANKS1A PE=4 SV=2
tr|E2QUE7|E2QUE7_CANLF	Uncharacterized protein OS=Canis lupus familiaris OX=9615 GN=RPL26 PE=3 SV=2
tr|E2QY07|E2QY07_CANLF	Actinin alpha 1 OS=Canis lupus familiaris OX=9615 GN=ACTN1 PE=4 SV=1
tr|F1PPI5|F1PPI5_CANLF	Amino acid transporter OS=Canis lupus familiaris OX=9615 GN=SLC1A5 PE=3 SV=1
tr|F1PS26|F1PS26_CANLF	NADH-cytochrome b5 reductase OS=Canis lupus familiaris OX=9615 GN=CYB5R3 PE=3 SV=2
tr|J9P516|J9P516_CANLF	VPS26, retromer complex component B OS=Canis lupus familiaris OX=9615 GN=VPS26B PE=4 SV=1
tr|J9NZV3|J9NZV3_CANLF	RNA binding motif protein 12 OS=Canis lupus familiaris OX=9615 GN=RBM12 PE=4 SV=1
tr|J9NY44|J9NY44_CANLF	Ubiquitin conjugating enzyme E2 V2 OS=Canis lupus familiaris OX=9615 GN=UBE2V2 PE=4 SV=1
tr|E2R3N2|E2R3N2_CANLF	Delta-1-pyrroline-5-carboxylate synthase OS=Canis lupus familiaris OX=9615 GN=ALDH18A1 PE=3 SV=2
tr|E2QRU7|E2QRU7_CANLF	Cullin 2 OS=Canis lupus familiaris OX=9615 GN=CUL2 PE=3 SV=1
tr|E2RKQ0|E2RKQ0_CANLF	Protein phosphatase methylesterase 1 OS=Canis lupus familiaris OX=9615 GN=PPME1 PE=3 SV=2
tr|F1PYM5|F1PYM5_CANLF	Leucine rich repeat containing 47 OS=Canis lupus familiaris OX=9615 GN=LRRC47 PE=4 SV=2
tr|F1PQ80|F1PQ80_CANLF	SEC23 interacting protein OS=Canis lupus familiaris OX=9615 GN=SEC23IP PE=4 SV=2
tr|J9NWN8|J9NWN8_CANLF	GRB10 interacting GYF protein 2 OS=Canis lupus familiaris OX=9615 GN=GIGYF2 PE=4 SV=1
tr|J9NWL1|J9NWL1_CANLF	Ubiquitin conjugating enzyme E2 I OS=Canis lupus familiaris OX=9615 GN=UBE2I PE=3 SV=1
tr|J9NWK4|J9NWK4_CANLF	CDC42 effector protein 5 OS=Canis lupus familiaris OX=9615 GN=CDC42EP5 PE=4 SV=1
tr|A0A0B5CXY9|A0A0B5CXY9_CANLF	Cadherin 2 (Fragment) OS=Canis lupus familiaris OX=9615 GN=CDH2 PE=4 SV=1
tr|F1PX67|F1PX67_CANLF	Histone cluster 1 H1 family member c OS=Canis lupus familiaris OX=9615 GN=HIST1H1C PE=3 SV=2
sp|Q5JZQ9|CLN5_CANLF	Ceroid-lipofuscinosis neuronal protein 5 OS=Canis lupus familiaris OX=9615 GN=CLN5 PE=2 SV=1
tr|F6XPR6|F6XPR6_CANLF	Uncharacterized protein OS=Canis lupus familiaris OX=9615 PE=4 SV=1
tr|F6XXD6|F6XXD6_CANLF	CCR4-NOT transcription complex subunit 3 OS=Canis lupus familiaris OX=9615 GN=CNOT3 PE=4 SV=1
tr|F1P732|F1P732_CANLF	Target of myb1 membrane trafficking protein OS=Canis lupus familiaris OX=9615 GN=TOM1 PE=3 SV=2
tr|E2RDE0|E2RDE0_CANLF	Microtubule associated protein RP/EB family member 3 OS=Canis lupus familiaris OX=9615 GN=MAPRE3 PE=4 SV=1
tr|E2R2S9|E2R2S9_CANLF	Uncharacterized protein OS=Canis lupus familiaris OX=9615 PE=4 SV=1
tr|F1Q2J2|F1Q2J2_CANLF	FACT complex subunit SSRP1 OS=Canis lupus familiaris OX=9615 GN=SSRP1 PE=3 SV=2
tr|E2RT32|E2RT32_CANLF	Protein phosphatase 1 regulatory subunit 8 OS=Canis lupus familiaris OX=9615 GN=PPP1R8 PE=3 SV=1
tr|F6XIP5|F6XIP5_CANLF	Myosin light chain 6B OS=Canis lupus familiaris OX=9615 GN=MYL6B PE=4 SV=1
tr|F1PQ58|F1PQ58_CANLF	Synaptotagmin 6 OS=Canis lupus familiaris OX=9615 GN=SYT6 PE=4 SV=2
tr|F2Z4N6|F2Z4N6_CANLF	Serine and arginine rich splicing factor 3 OS=Canis lupus familiaris OX=9615 GN=SRSF3 PE=4 SV=1
tr|E2R8E3|E2R8E3_CANLF	Uncharacterized protein OS=Canis lupus familiaris OX=9615 GN=DCTPP1 PE=4 SV=1
tr|J9P643|J9P643_CANLF	Globin B1 OS=Canis lupus familiaris OX=9615 GN=LOC609402 PE=3 SV=1
tr|F1PWG0|F1PWG0_CANLF	Uncharacterized protein OS=Canis lupus familiaris OX=9615 GN=IFIT5 PE=4 SV=2
tr|J9P7I3|J9P7I3_CANLF	Inter-alpha-trypsin inhibitor heavy chain 3 OS=Canis lupus familiaris OX=9615 GN=ITIH3 PE=4 SV=1
tr|F2Z4P2|F2Z4P2_CANLF	Ribosomal protein L7a OS=Canis lupus familiaris OX=9615 GN=RPL7A PE=4 SV=2
tr|F1PWF5|F1PWF5_CANLF	LIM and cysteine rich domains 1 OS=Canis lupus familiaris OX=9615 GN=LMCD1 PE=4 SV=2
tr|F1PAH7|F1PAH7_CANLF	Eukaryotic translation initiation factor 4 gamma 2 OS=Canis lupus familiaris OX=9615 GN=EIF4G2 PE=4 SV=2
tr|F6V2H2|F6V2H2_CANLF	Phosphoenolpyruvate carboxykinase 2, mitochondrial OS=Canis lupus familiaris OX=9615 GN=PCK2 PE=3 SV=1
sp|Q28288|STXB2_CANLF	Syntaxin-binding protein 2 OS=Canis lupus familiaris OX=9615 GN=STXBP2 PE=2 SV=1
tr|F1PQM7|F1PQM7_CANLF	Tetraspanin OS=Canis lupus familiaris OX=9615 GN=CD9 PE=3 SV=2
tr|F1PH83|F1PH83_CANLF	Component of oligomeric golgi complex 7 OS=Canis lupus familiaris OX=9615 GN=COG7 PE=4 SV=2
tr|E2R479|E2R479_CANLF	Cleavage stimulation factor subunit 3 OS=Canis lupus familiaris OX=9615 GN=CSTF3 PE=4 SV=1
tr|F2Z4N1|F2Z4N1_CANLF	Uncharacterized protein OS=Canis lupus familiaris OX=9615 PE=3 SV=2
tr|J9P499|J9P499_CANLF	STE20 like kinase OS=Canis lupus familiaris OX=9615 GN=SLK PE=4 SV=1
tr|E2RDB2|E2RDB2_CANLF	Serine and arginine rich splicing factor 2 OS=Canis lupus familiaris OX=9615 GN=SRSF2 PE=4 SV=1
tr|E2QTT8|E2QTT8_CANLF	Heat shock factor binding protein 1 OS=Canis lupus familiaris OX=9615 GN=HSBP1 PE=4 SV=1
sp|Q8HX86|TPMT_CANLF	Thiopurine S-methyltransferase OS=Canis lupus familiaris OX=9615 GN=TPMT PE=2 SV=1
tr|F6X511|F6X511_CANLF	Unconventional SNARE in the ER 1 OS=Canis lupus familiaris OX=9615 GN=USE1 PE=4 SV=1
tr|H9GW49|H9GW49_CANLF	Uncharacterized protein OS=Canis lupus familiaris OX=9615 PE=3 SV=1
tr|J9NS37|J9NS37_CANLF	Uncharacterized protein OS=Canis lupus familiaris OX=9615 PE=4 SV=1
tr|J9NYY3|J9NYY3_CANLF	Uncharacterized protein OS=Canis lupus familiaris OX=9615 GN=LOC102157231 PE=4 SV=1
tr|E2RKJ1|E2RKJ1_CANLF	Cell cycle and apoptosis regulator 2 OS=Canis lupus familiaris OX=9615 GN=CCAR2 PE=4 SV=2
tr|F6UZI3|F6UZI3_CANLF	Protein phosphatase 1 regulatory subunit 18 OS=Canis lupus familiaris OX=9615 GN=PPP1R18 PE=4 SV=1
tr|J9NTJ9|J9NTJ9_CANLF	Signal recognition particle receptor subunit alpha OS=Canis lupus familiaris OX=9615 GN=SRPRA PE=4 SV=1
tr|E2QYK6|E2QYK6_CANLF	Chromobox 5 OS=Canis lupus familiaris OX=9615 GN=CBX5 PE=4 SV=1
tr|J9NZN7|J9NZN7_CANLF	Uncharacterized protein OS=Canis lupus familiaris OX=9615 GN=C21H11orf58 PE=4 SV=1
tr|E2REI0|E2REI0_CANLF	HEAT repeat containing 5A OS=Canis lupus familiaris OX=9615 GN=HEATR5A PE=4 SV=2
tr|E2R095|E2R095_CANLF	5'-nucleotidase OS=Canis lupus familiaris OX=9615 GN=NT5C3B PE=3 SV=2
tr|F6X725|F6X725_CANLF	ATP binding cassette subfamily E member 1 OS=Canis lupus familiaris OX=9615 GN=ABCE1 PE=4 SV=1
tr|G1K2D5|G1K2D5_CANLF	Calcyphosin OS=Canis lupus familiaris OX=9615 GN=CAPS PE=4 SV=1
tr|F6JY97|F6JY97_CANLF	Vesicle protein sorting 13 B (Fragment) OS=Canis lupus familiaris OX=9615 GN=VPS13B PE=4 SV=1
tr|F1P9I2|F1P9I2_CANLF	Cdk5 and Abl enzyme substrate 1 OS=Canis lupus familiaris OX=9615 GN=CABLES1 PE=4 SV=2
tr|F1PN18|F1PN18_CANLF	Sphingomyelin synthase 1 OS=Canis lupus familiaris OX=9615 GN=SGMS1 PE=4 SV=2
tr|J9NT37|J9NT37_CANLF	Prostaglandin E synthase 3 OS=Canis lupus familiaris OX=9615 GN=PTGES3 PE=4 SV=1
sp|P61010|SRP54_CANLF	Signal recognition particle 54 kDa protein OS=Canis lupus familiaris OX=9615 GN=SRP54 PE=1 SV=1
tr|J9P4A7|J9P4A7_CANLF	Leucine rich repeat containing 45 OS=Canis lupus familiaris OX=9615 GN=LRRC45 PE=4 SV=1
tr|E2RFC5|E2RFC5_CANLF	Protein kinase AMP-activated non-catalytic subunit gamma 2 OS=Canis lupus familiaris OX=9615 GN=PRKAG2 PE=4 SV=2
tr|F1PSA3|F1PSA3_CANLF	Polypeptide N-acetylgalactosaminyltransferase OS=Canis lupus familiaris OX=9615 GN=GALNT12 PE=3 SV=2
tr|J9NUE4|J9NUE4_CANLF	Phosphoinositide phospholipase C OS=Canis lupus familiaris OX=9615 GN=PLCH2 PE=4 SV=1
tr|J9P324|J9P324_CANLF	NK1 homeobox 1 OS=Canis lupus familiaris OX=9615 GN=NKX1-1 PE=4 SV=1
tr|F1PHD7|F1PHD7_CANLF	Uncharacterized protein OS=Canis lupus familiaris OX=9615 PE=4 SV=2
tr|J9P2T7|J9P2T7_CANLF	Uncharacterized protein OS=Canis lupus familiaris OX=9615 PE=4 SV=1
tr|F1PNX1|F1PNX1_CANLF	NPL4 homolog, ubiquitin recognition factor OS=Canis lupus familiaris OX=9615 GN=NPLOC4 PE=4 SV=2
tr|E2RDT0|E2RDT0_CANLF	Kinesin-like protein OS=Canis lupus familiaris OX=9615 GN=KIF6 PE=3 SV=2
tr|E2QW27|E2QW27_CANLF	La ribonucleoprotein domain family member 7 OS=Canis lupus familiaris OX=9615 GN=LARP7 PE=4 SV=1
tr|E2RPE3|E2RPE3_CANLF	IST1, ESCRT-III associated factor OS=Canis lupus familiaris OX=9615 GN=IST1 PE=4 SV=1
tr|F1PB91|F1PB91_CANLF	Echinoderm microtubule associated protein like 1 OS=Canis lupus familiaris OX=9615 GN=EML1 PE=4 SV=2
tr|F6XRD6|F6XRD6_CANLF	Sosondowah ankyrin repeat domain family member C OS=Canis lupus familiaris OX=9615 GN=SOWAHC PE=4 SV=1
tr|E2RRD4|E2RRD4_CANLF	Uncharacterized protein OS=Canis lupus familiaris OX=9615 GN=PRDX3 PE=4 SV=1
tr|F1PPB6|F1PPB6_CANLF	Deoxyribose-phosphate aldolase OS=Canis lupus familiaris OX=9615 GN=DERA PE=4 SV=2
tr|E2R4A3|E2R4A3_CANLF	Transcription elongation factor spt6 OS=Canis lupus familiaris OX=9615 GN=SUPT6H PE=3 SV=1
tr|E2QU10|E2QU10_CANLF	Cysteine rich secretory protein LCCL domain containing 2 OS=Canis lupus familiaris OX=9615 GN=CRISPLD2 PE=4 SV=1
tr|J9NZ64|J9NZ64_CANLF	Rho guanine nucleotide exchange factor 11 OS=Canis lupus familiaris OX=9615 GN=ARHGEF11 PE=4 SV=1
tr|F1PIA4|F1PIA4_CANLF	KxDL motif containing 1 OS=Canis lupus familiaris OX=9615 GN=KXD1 PE=4 SV=2
tr|F1Q2L2|F1Q2L2_CANLF	GABA type A receptor-associated protein OS=Canis lupus familiaris OX=9615 GN=GABARAP PE=3 SV=2
tr|J9P9U0|J9P9U0_CANLF	Doublecortin domain containing 1 OS=Canis lupus familiaris OX=9615 GN=DCDC1 PE=4 SV=1
tr|F1P694|F1P694_CANLF	Nucleophosmin/nucleoplasmin 3 OS=Canis lupus familiaris OX=9615 GN=NPM3 PE=4 SV=2
tr|F1PK74|F1PK74_CANLF	2-oxoglutarate and iron dependent oxygenase domain containing 1 OS=Canis lupus familiaris OX=9615 GN=OGFOD1 PE=4 SV=2
tr|E2RBZ1|E2RBZ1_CANLF	Mbt domain containing 1 OS=Canis lupus familiaris OX=9615 GN=MBTD1 PE=4 SV=2
tr|J9P530|J9P530_CANLF	Metadherin OS=Canis lupus familiaris OX=9615 GN=MTDH PE=4 SV=1
tr|J9P2I8|J9P2I8_CANLF	Serine and arginine rich splicing factor 7 OS=Canis lupus familiaris OX=9615 GN=SRSF7 PE=4 SV=1
tr|E2RFH1|E2RFH1_CANLF	Transcobalamin 2 OS=Canis lupus familiaris OX=9615 GN=TCN2 PE=4 SV=2
tr|J9NXS3|J9NXS3_CANLF	Peptidyl-prolyl cis-trans isomerase OS=Canis lupus familiaris OX=9615 PE=3 SV=1
tr|J9NYB0|J9NYB0_CANLF	TWIST neighbor OS=Canis lupus familiaris OX=9615 GN=TWISTNB PE=4 SV=1
tr|F1P9Q2|F1P9Q2_CANLF	SH3 domain containing kinase binding protein 1 OS=Canis lupus familiaris OX=9615 GN=SH3KBP1 PE=4 SV=2
tr|E2QZU9|E2QZU9_CANLF	Fem-1 homolog C OS=Canis lupus familiaris OX=9615 GN=FEM1C PE=4 SV=2
tr|J9NTQ5|J9NTQ5_CANLF	Uncharacterized protein OS=Canis lupus familiaris OX=9615 GN=LOC609816 PE=4 SV=1
tr|F1PPW5|F1PPW5_CANLF	Uncharacterized protein OS=Canis lupus familiaris OX=9615 PE=4 SV=2
tr|J9P5E2|J9P5E2_CANLF	Uncharacterized protein OS=Canis lupus familiaris OX=9615 PE=4 SV=1
tr|E2R7R4|E2R7R4_CANLF	PDS5 cohesin associated factor A OS=Canis lupus familiaris OX=9615 GN=PDS5A PE=4 SV=1
tr|E2R513|E2R513_CANLF	Heme oxygenase 2 OS=Canis lupus familiaris OX=9615 GN=HMOX2 PE=4 SV=1
tr|J9P824|J9P824_CANLF	Beta-1,4-galactosyltransferase 7 OS=Canis lupus familiaris OX=9615 GN=B4GALT7 PE=4 SV=1
tr|F1PQP8|F1PQP8_CANLF	Ring finger protein 130 OS=Canis lupus familiaris OX=9615 GN=RNF130 PE=4 SV=2
tr|J9NT66|J9NT66_CANLF	Uncharacterized protein OS=Canis lupus familiaris OX=9615 PE=4 SV=1
tr|F1Q0N9|F1Q0N9_CANLF	Keratin 19 OS=Canis lupus familiaris OX=9615 GN=KRT19 PE=3 SV=1
tr|E2QWE2|E2QWE2_CANLF	Centromere protein J OS=Canis lupus familiaris OX=9615 GN=CENPJ PE=4 SV=2
tr|F1PUU5|F1PUU5_CANLF	CD2 associated protein OS=Canis lupus familiaris OX=9615 GN=CD2AP PE=4 SV=2
tr|F6XC91|F6XC91_CANLF	Solute carrier family 26 member 10 OS=Canis lupus familiaris OX=9615 GN=SLC26A10 PE=4 SV=1
tr|E2RB01|E2RB01_CANLF	Angiopoietin like 2 OS=Canis lupus familiaris OX=9615 GN=ANGPTL2 PE=4 SV=1
tr|F1Q225|F1Q225_CANLF	C-X-C motif chemokine ligand 16 OS=Canis lupus familiaris OX=9615 GN=CXCL16 PE=4 SV=2
tr|E2RPS1|E2RPS1_CANLF	C-type lectin domain family 4 member G OS=Canis lupus familiaris OX=9615 GN=CLEC4G PE=4 SV=2
tr|J9NRR9|J9NRR9_CANLF	YME1 like 1 ATPase OS=Canis lupus familiaris OX=9615 GN=YME1L1 PE=3 SV=1
tr|E2R0X9|E2R0X9_CANLF	AKT1 substrate 1 OS=Canis lupus familiaris OX=9615 GN=AKT1S1 PE=4 SV=1
tr|E2RSX0|E2RSX0_CANLF	Arsenical pump-driving ATPase OS=Canis lupus familiaris OX=9615 GN=ASNA1 PE=3 SV=2
tr|E2QWM4|E2QWM4_CANLF	Spectrin beta, non-erythrocytic 4 OS=Canis lupus familiaris OX=9615 GN=SPTBN4 PE=4 SV=1
tr|E2RSF5|E2RSF5_CANLF	EF-hand calcium binding domain 14 OS=Canis lupus familiaris OX=9615 GN=EFCAB14 PE=4 SV=1
tr|J9P6D6|J9P6D6_CANLF	Dual specificity protein phosphatase OS=Canis lupus familiaris OX=9615 GN=DUSP4 PE=3 SV=1
tr|J9NZR6|J9NZR6_CANLF	Potassium voltage-gated channel subfamily Q member 5 OS=Canis lupus familiaris OX=9615 GN=KCNQ5 PE=3 SV=1
tr|F1PP91|F1PP91_CANLF	DnaJ heat shock protein family (Hsp40) member A4 OS=Canis lupus familiaris OX=9615 GN=DNAJA4 PE=3 SV=1
tr|J9NWA2|J9NWA2_CANLF	Zinc finger RNA binding protein OS=Canis lupus familiaris OX=9615 GN=ZFR PE=4 SV=1
tr|E2R210|E2R210_CANLF	Uncharacterized protein OS=Canis lupus familiaris OX=9615 PE=3 SV=2
tr|F1PA33|F1PA33_CANLF	Potassium calcium-activated channel subfamily N member 2 OS=Canis lupus familiaris OX=9615 GN=KCNN2 PE=4 SV=2
tr|J9PBA7|J9PBA7_CANLF	Polycystin family receptor for egg jelly OS=Canis lupus familiaris OX=9615 GN=PKDREJ PE=4 SV=1
tr|F1PGU5|F1PGU5_CANLF	Receptor-type tyrosine-protein phosphatase OS=Canis lupus familiaris OX=9615 GN=PTPRE PE=3 SV=2
tr|E2RQA6|E2RQA6_CANLF	Bardet-Biedl syndrome 7 protein homolog OS=Canis lupus familiaris OX=9615 GN=BBS7 PE=4 SV=1
tr|J9P1G3|J9P1G3_CANLF	Uncharacterized protein OS=Canis lupus familiaris OX=9615 PE=4 SV=1
tr|E2QWM5|E2QWM5_CANLF	Calcium/calmodulin dependent protein kinase I OS=Canis lupus familiaris OX=9615 GN=CAMK1 PE=3 SV=1
tr|F1Q235|F1Q235_CANLF	Ras related GTP binding D OS=Canis lupus familiaris OX=9615 GN=RRAGD PE=4 SV=2
tr|E2QXU4|E2QXU4_CANLF	Endonuclease/exonuclease/phosphatase family domain containing 1 OS=Canis lupus familiaris OX=9615 GN=EEPD1 PE=4 SV=2
tr|F1PM19|F1PM19_CANLF	ERCC excision repair 6 like 2 OS=Canis lupus familiaris OX=9615 GN=ERCC6L2 PE=4 SV=2
tr|F6UNP7|F6UNP7_CANLF	Neurofilament medium OS=Canis lupus familiaris OX=9615 GN=NEFM PE=3 SV=1
tr|J9P9N1|J9P9N1_CANLF	S1 RNA binding domain 1 OS=Canis lupus familiaris OX=9615 GN=SRBD1 PE=4 SV=1
tr|Q867A1|Q867A1_CANLF	Laminin alpha 3 (Fragment) OS=Canis lupus familiaris OX=9615 PE=2 SV=1
tr|E2QUP2|E2QUP2_CANLF	Uncharacterized protein OS=Canis lupus familiaris OX=9615 GN=LOC102153923 PE=4 SV=1
tr|E2QVF9|E2QVF9_CANLF	Uncharacterized protein OS=Canis lupus familiaris OX=9615 GN=AIMP2 PE=4 SV=1
tr|J9P1S3|J9P1S3_CANLF	Coiled-coil alpha-helical rod protein 1 OS=Canis lupus familiaris OX=9615 GN=CCHCR1 PE=4 SV=1
tr|F1PFU0|F1PFU0_CANLF	Suppression of tumorigenicity 7 OS=Canis lupus familiaris OX=9615 GN=ST7 PE=4 SV=2
tr|F1PV45|F1PV45_CANLF	Titin OS=Canis lupus familiaris OX=9615 GN=TTN PE=4 SV=2
tr|F1P9H8|F1P9H8_CANLF	Adhesion G protein-coupled receptor L4 OS=Canis lupus familiaris OX=9615 GN=ADGRL4 PE=3 SV=2
tr|F1PIM5|F1PIM5_CANLF	PNMA family member 8A OS=Canis lupus familiaris OX=9615 GN=PNMA8A PE=4 SV=2
tr|F1PPS3|F1PPS3_CANLF	N-terminal asparagine amidase OS=Canis lupus familiaris OX=9615 GN=NTAN1 PE=4 SV=2
tr|E2R543|E2R543_CANLF	Aldehyde dehydrogenase 1 family member A3 OS=Canis lupus familiaris OX=9615 GN=ALDH1A3 PE=3 SV=1
tr|F1PU26|F1PU26_CANLF	Collectin subfamily member 12 OS=Canis lupus familiaris OX=9615 GN=COLEC12 PE=4 SV=2
tr|F1PVW6|F1PVW6_CANLF	Kinesin-like protein OS=Canis lupus familiaris OX=9615 GN=KIF2B PE=3 SV=2
tr|F1PEH0|F1PEH0_CANLF	Adenosine receptor A2 OS=Canis lupus familiaris OX=9615 GN=ADORA2B PE=3 SV=1
tr|F1PU60|F1PU60_CANLF	Rho-associated protein kinase OS=Canis lupus familiaris OX=9615 GN=ROCK1 PE=3 SV=2
tr|F1PKR0|F1PKR0_CANLF	Uncharacterized protein OS=Canis lupus familiaris OX=9615 GN=SDCBP PE=4 SV=2
tr|F1PNK7|F1PNK7_CANLF	Plexin domain containing 2 OS=Canis lupus familiaris OX=9615 GN=PLXDC2 PE=4 SV=2
sp|Q864L3|SCN2B_CANLF	Sodium channel subunit beta-2 OS=Canis lupus familiaris OX=9615 GN=SCN2B PE=2 SV=2
tr|F1PK15|F1PK15_CANLF	PPFIA binding protein 2 OS=Canis lupus familiaris OX=9615 GN=PPFIBP2 PE=4 SV=2
tr|F1Q180|F1Q180_CANLF	Protein inhibitor of activated STAT 4 OS=Canis lupus familiaris OX=9615 GN=PIAS4 PE=4 SV=2
tr|E2QVA7|E2QVA7_CANLF	StAR related lipid transfer domain containing 3 OS=Canis lupus familiaris OX=9615 GN=STARD3 PE=4 SV=1
tr|J9P1I4|J9P1I4_CANLF	Uncharacterized protein OS=Canis lupus familiaris OX=9615 PE=3 SV=1
tr|J9P9Z8|J9P9Z8_CANLF	Carbohydrate sulfotransferase OS=Canis lupus familiaris OX=9615 GN=CHST14 PE=3 SV=1
tr|F1PNF0|F1PNF0_CANLF	Leishmanolysin like peptidase OS=Canis lupus familiaris OX=9615 GN=LMLN PE=4 SV=2
tr|J9P2B2|J9P2B2_CANLF	Uncharacterized protein OS=Canis lupus familiaris OX=9615 PE=4 SV=1
tr|E2R9M1|E2R9M1_CANLF	Minichromosome maintenance 8 homologous recombination repair factor OS=Canis lupus familiaris OX=9615 GN=MCM8 PE=3 SV=2
tr|E2R9F0|E2R9F0_CANLF	Tyrosine kinase non receptor 1 OS=Canis lupus familiaris OX=9615 GN=TNK1 PE=3 SV=2
tr|E2QUI7|E2QUI7_CANLF	EPS8 like 1 OS=Canis lupus familiaris OX=9615 GN=EPS8L1 PE=4 SV=2
tr|E2RSA6|E2RSA6_CANLF	Catenin beta like 1 OS=Canis lupus familiaris OX=9615 GN=CTNNBL1 PE=4 SV=2
tr|J9NVV4|J9NVV4_CANLF	Uncharacterized protein OS=Canis lupus familiaris OX=9615 GN=LOC100856005 PE=4 SV=1
tr|E2RD95|E2RD95_CANLF	G protein subunit beta 2 OS=Canis lupus familiaris OX=9615 GN=GNB2 PE=4 SV=1
tr|E2R1S4|E2R1S4_CANLF	Family with sequence similarity 83 member C OS=Canis lupus familiaris OX=9615 GN=FAM83C PE=4 SV=2
tr|E2QUK0|E2QUK0_CANLF	Endothelial PAS domain protein 1 OS=Canis lupus familiaris OX=9615 GN=EPAS1 PE=4 SV=1
tr|J9P6B2|J9P6B2_CANLF	Immunoglobulin superfamily member 9B OS=Canis lupus familiaris OX=9615 GN=IGSF9B PE=4 SV=1
tr|J9P9X4|J9P9X4_CANLF	Uncharacterized protein OS=Canis lupus familiaris OX=9615 PE=4 SV=1
tr|J9P352|J9P352_CANLF	Uncharacterized protein OS=Canis lupus familiaris OX=9615 PE=4 SV=1
tr|J9NW44|J9NW44_CANLF	CMT1A duplicated region transcript 4 OS=Canis lupus familiaris OX=9615 GN=CDRT4 PE=4 SV=1
tr|E2R5P4|E2R5P4_CANLF	Left-right determination factor OS=Canis lupus familiaris OX=9615 GN=LOC490387 PE=3 SV=1
tr|F1PM34|F1PM34_CANLF	Glypican 3 OS=Canis lupus familiaris OX=9615 GN=GPC3 PE=3 SV=2
tr|J9NWU0|J9NWU0_CANLF	Sin3A associated protein 18 OS=Canis lupus familiaris OX=9615 GN=SAP18 PE=4 SV=1
tr|F6Y4X7|F6Y4X7_CANLF	Metaxin 1 OS=Canis lupus familiaris OX=9615 GN=MTX1 PE=4 SV=1
tr|J9P9V1|J9P9V1_CANLF	Leucine carboxyl methyltransferase 1 OS=Canis lupus familiaris OX=9615 GN=LCMT1 PE=3 SV=1
tr|E2RR96|E2RR96_CANLF	WAS protein family member 2 OS=Canis lupus familiaris OX=9615 GN=WASF2 PE=4 SV=1
tr|J9PBN8|J9PBN8_CANLF	Uncharacterized protein OS=Canis lupus familiaris OX=9615 GN=PTTG1 PE=4 SV=1
tr|F6UXD0|F6UXD0_CANLF	Protein phosphatase 1 regulatory subunit 21 OS=Canis lupus familiaris OX=9615 GN=PPP1R21 PE=4 SV=1
tr|F1PLT6|F1PLT6_CANLF	FYVE, RhoGEF and PH domain containing 5 OS=Canis lupus familiaris OX=9615 GN=FGD5 PE=4 SV=2
tr|F2Z4N5|F2Z4N5_CANLF	40S ribosomal protein S11 OS=Canis lupus familiaris OX=9615 GN=RPS11 PE=3 SV=1
tr|F1PZU1|F1PZU1_CANLF	S100 calcium binding protein Z OS=Canis lupus familiaris OX=9615 GN=S100Z PE=4 SV=2
tr|E2QUR8|E2QUR8_CANLF	Myosin VI OS=Canis lupus familiaris OX=9615 GN=MYO6 PE=3 SV=2
tr|E2RNF2|E2RNF2_CANLF	Dynein regulatory complex subunit 1 OS=Canis lupus familiaris OX=9615 GN=DRC1 PE=4 SV=2
tr|E2RJF8|E2RJF8_CANLF	Kinesin family member 15 OS=Canis lupus familiaris OX=9615 GN=KIF15 PE=3 SV=2
tr|F1PUY0|F1PUY0_CANLF	GCN1, eIF2 alpha kinase activator homolog OS=Canis lupus familiaris OX=9615 GN=GCN1 PE=4 SV=2
tr|F1PFM4|F1PFM4_CANLF	Glutathione peroxidase OS=Canis lupus familiaris OX=9615 GN=GPX7 PE=3 SV=2
tr|J9P9W1|J9P9W1_CANLF	Uncharacterized protein OS=Canis lupus familiaris OX=9615 PE=4 SV=1
tr|J9NYB5|J9NYB5_CANLF	Uncharacterized protein OS=Canis lupus familiaris OX=9615 PE=4 SV=1
tr|J9P758|J9P758_CANLF	Sorcin OS=Canis lupus familiaris OX=9615 GN=SRI PE=4 SV=1
tr|F1PV42|F1PV42_CANLF	Uncharacterized protein OS=Canis lupus familiaris OX=9615 PE=4 SV=1
tr|F1PGL1|F1PGL1_CANLF	Versican OS=Canis lupus familiaris OX=9615 GN=VCAN PE=4 SV=2
tr|F1PSA9|F1PSA9_CANLF	Uncharacterized protein OS=Canis lupus familiaris OX=9615 PE=3 SV=2
tr|F6XHT8|F6XHT8_CANLF	Hydroxyacyl-CoA dehydrogenase OS=Canis lupus familiaris OX=9615 GN=HADH PE=4 SV=1
tr|J9NS83|J9NS83_CANLF	Uncharacterized protein OS=Canis lupus familiaris OX=9615 PE=4 SV=1
tr|E2R7F3|E2R7F3_CANLF	Uncharacterized protein OS=Canis lupus familiaris OX=9615 PE=3 SV=2
tr|F1Q0L9|F1Q0L9_CANLF	TEA domain transcription factor 1 OS=Canis lupus familiaris OX=9615 GN=TEAD1 PE=4 SV=2
tr|E2QVP6|E2QVP6_CANLF	Tyrosine 3-monooxygenase/tryptophan 5-monooxygenase activation protein gamma OS=Canis lupus familiaris OX=9615 GN=YWHAG PE=3 SV=1
tr|J9P3P8|J9P3P8_CANLF	Uncharacterized protein OS=Canis lupus familiaris OX=9615 PE=3 SV=1
tr|J9NWF6|J9NWF6_CANLF	Establishment of sister chromatid cohesion N-acetyltransferase 2 OS=Canis lupus familiaris OX=9615 GN=ESCO2 PE=4 SV=1
tr|F1P6R2|F1P6R2_CANLF	Cilia and flagella associated protein 45 OS=Canis lupus familiaris OX=9615 GN=CFAP45 PE=4 SV=2
tr|J9P851|J9P851_CANLF	GLE1, RNA export mediator OS=Canis lupus familiaris OX=9615 GN=GLE1 PE=4 SV=1
tr|E2RAT8|E2RAT8_CANLF	VPS18, CORVET/HOPS core subunit OS=Canis lupus familiaris OX=9615 GN=VPS18 PE=4 SV=1
tr|F1PCF0|F1PCF0_CANLF	Jade family PHD finger 1 OS=Canis lupus familiaris OX=9615 GN=JADE1 PE=4 SV=2
tr|E2RGM9|E2RGM9_CANLF	Thioesterase superfamily member 5 OS=Canis lupus familiaris OX=9615 GN=THEM5 PE=4 SV=1
tr|E2RNE1|E2RNE1_CANLF	Serpin family A member 12 OS=Canis lupus familiaris OX=9615 GN=SERPINA12 PE=3 SV=1
tr|J9P143|J9P143_CANLF	Uncharacterized protein OS=Canis lupus familiaris OX=9615 PE=4 SV=1
tr|F6X8E7|F6X8E7_CANLF	Histone deacetylase OS=Canis lupus familiaris OX=9615 GN=HDAC9 PE=3 SV=1
tr|E2RI72|E2RI72_CANLF	Protein phosphatase 1 regulatory subunit 37 OS=Canis lupus familiaris OX=9615 GN=PPP1R37 PE=4 SV=1
tr|F6USN4|F6USN4_CANLF	Uncharacterized protein OS=Canis lupus familiaris OX=9615 GN=LOC611455 PE=4 SV=1
tr|F1Q1N7|F1Q1N7_CANLF	Uncharacterized protein OS=Canis lupus familiaris OX=9615 GN=CTU1 PE=4 SV=2
tr|F1PZU9|F1PZU9_CANLF	Glycogenin 2 OS=Canis lupus familiaris OX=9615 GN=GYG2 PE=4 SV=2
tr|F1PYN7|F1PYN7_CANLF	Tumor protein p73 OS=Canis lupus familiaris OX=9615 GN=TP73 PE=3 SV=2
tr|E2R917|E2R917_CANLF	Keratin 75 OS=Canis lupus familiaris OX=9615 GN=KRT75 PE=3 SV=2
tr|L7N0C9|L7N0C9_CANLF	CD1d molecule OS=Canis lupus familiaris OX=9615 GN=CD1D PE=4 SV=1
tr|J9NSU7|J9NSU7_CANLF	Dimethylarginine dimethylaminohydrolase 1 OS=Canis lupus familiaris OX=9615 GN=DDAH1 PE=4 SV=1
tr|F6V4W0|F6V4W0_CANLF	Basic leucine zipper and W2 domains 1 OS=Canis lupus familiaris OX=9615 GN=BZW1 PE=4 SV=1
tr|F1PSS9|F1PSS9_CANLF	Cilia and flagella associated protein 73 OS=Canis lupus familiaris OX=9615 GN=CFAP73 PE=4 SV=2
tr|F1Q144|F1Q144_CANLF	PNMA family member 6A OS=Canis lupus familiaris OX=9615 GN=PNMA6A PE=4 SV=2
tr|J9NZ53|J9NZ53_CANLF	Nucleoporin like 2 OS=Canis lupus familiaris OX=9615 GN=NUPL2 PE=4 SV=1
tr|J9NZM5|J9NZM5_CANLF	Uncharacterized protein OS=Canis lupus familiaris OX=9615 PE=4 SV=1
sp|E2RQ08|RPN1_CANLF	Dolichyl-diphosphooligosaccharide--protein glycosyltransferase subunit 1 OS=Canis lupus familiaris OX=9615 GN=RPN1 PE=1 SV=1
tr|F1PA22|F1PA22_CANLF	Profilin OS=Canis lupus familiaris OX=9615 GN=PFN2 PE=3 SV=2
tr|J9PAC5|J9PAC5_CANLF	Uncharacterized protein OS=Canis lupus familiaris OX=9615 PE=4 SV=1
tr|A6Q0K4|A6Q0K4_CANLF	Frataxin OS=Canis lupus familiaris OX=9615 GN=FXN PE=2 SV=1
tr|F1Q042|F1Q042_CANLF	Mitochondrial calcium uniporter dominant negative beta subunit OS=Canis lupus familiaris OX=9615 GN=MCUB PE=4 SV=2
tr|J9NVT9|J9NVT9_CANLF	UBX domain protein 1 OS=Canis lupus familiaris OX=9615 GN=UBXN1 PE=4 SV=1
tr|E2QU91|E2QU91_CANLF	CAP-Gly domain containing linker protein 2 OS=Canis lupus familiaris OX=9615 GN=CLIP2 PE=4 SV=2
tr|F1PKU3|F1PKU3_CANLF	Kirre like nephrin family adhesion molecule 2 OS=Canis lupus familiaris OX=9615 GN=KIRREL2 PE=4 SV=2
tr|J9P332|J9P332_CANLF	Protein phosphatase 1 regulatory subunit 15A OS=Canis lupus familiaris OX=9615 GN=PPP1R15A PE=4 SV=1
tr|J9PAR7|J9PAR7_CANLF	Nuclear factor kappa B subunit 2 OS=Canis lupus familiaris OX=9615 GN=NFKB2 PE=4 SV=1
tr|E2RGB7|E2RGB7_CANLF	Ubiquitin like 7 OS=Canis lupus familiaris OX=9615 GN=UBL7 PE=4 SV=2
tr|E2RE87|E2RE87_CANLF	Islet cell autoantigen 1 OS=Canis lupus familiaris OX=9615 GN=ICA1 PE=4 SV=2
tr|E2RI85|E2RI85_CANLF	Nuclear receptor subfamily 2 group C member 2 OS=Canis lupus familiaris OX=9615 GN=NR2C2 PE=3 SV=2
tr|F1PTR1|F1PTR1_CANLF	KRAB-A domain containing 2 OS=Canis lupus familiaris OX=9615 GN=KRBA2 PE=4 SV=2
tr|F1Q4I8|F1Q4I8_CANLF	WD repeat domain 45 OS=Canis lupus familiaris OX=9615 GN=WDR45 PE=4 SV=2
tr|F6Y1U6|F6Y1U6_CANLF	Alkylglycerone-phosphate synthase OS=Canis lupus familiaris OX=9615 GN=AGPS PE=3 SV=1
tr|F1Q125|F1Q125_CANLF	Tripartite motif containing 68 OS=Canis lupus familiaris OX=9615 GN=TRIM68 PE=4 SV=2
tr|E2RMY4|E2RMY4_CANLF	Olfactory receptor OS=Canis lupus familiaris OX=9615 GN=OR5M11 PE=3 SV=2
tr|E2RDJ0|E2RDJ0_CANLF	GRIP and coiled-coil domain containing 1 OS=Canis lupus familiaris OX=9615 GN=GCC1 PE=4 SV=1
tr|J9JHU2|J9JHU2_CANLF	Uncharacterized protein OS=Canis lupus familiaris OX=9615 PE=4 SV=1
tr|F1PXI1|F1PXI1_CANLF	Tripartite motif containing 69 OS=Canis lupus familiaris OX=9615 GN=TRIM69 PE=4 SV=2
tr|F1PC27|F1PC27_CANLF	Uncharacterized protein OS=Canis lupus familiaris OX=9615 PE=4 SV=2
tr|J9NRM1|J9NRM1_CANLF	Notchless homolog 1 OS=Canis lupus familiaris OX=9615 GN=NLE1 PE=4 SV=1
tr|F1PEI8|F1PEI8_CANLF	Maestro heat like repeat family member 1 OS=Canis lupus familiaris OX=9615 GN=MROH1 PE=4 SV=2
tr|F1Q1Q1|F1Q1Q1_CANLF	Diaphanous related formin 2 OS=Canis lupus familiaris OX=9615 GN=DIAPH2 PE=4 SV=2
tr|F1PUV5|F1PUV5_CANLF	Rho guanine nucleotide exchange factor 37 OS=Canis lupus familiaris OX=9615 GN=ARHGEF37 PE=4 SV=2
tr|J9P3C5|J9P3C5_CANLF	Uncharacterized protein OS=Canis lupus familiaris OX=9615 PE=4 SV=1
tr|F1PCA2|F1PCA2_CANLF	Uncharacterized protein OS=Canis lupus familiaris OX=9615 GN=TRIM27 PE=4 SV=2
tr|J9P4W3|J9P4W3_CANLF	Zinc finger protein 512B OS=Canis lupus familiaris OX=9615 GN=ZNF512B PE=4 SV=1
tr|E2RTK7|E2RTK7_CANLF	Calcium binding and coiled-coil domain 2 OS=Canis lupus familiaris OX=9615 GN=CALCOCO2 PE=4 SV=2
tr|F1PJG2|F1PJG2_CANLF	SAC3 domain containing 1 OS=Canis lupus familiaris OX=9615 GN=SAC3D1 PE=4 SV=2
tr|F1PVB8|F1PVB8_CANLF	Uncharacterized protein OS=Canis lupus familiaris OX=9615 GN=LOC610160 PE=4 SV=1
tr|E2RCQ9|E2RCQ9_CANLF	S-formylglutathione hydrolase OS=Canis lupus familiaris OX=9615 GN=ESD PE=3 SV=1
tr|J9P5M7|J9P5M7_CANLF	Uncharacterized protein OS=Canis lupus familiaris OX=9615 PE=4 SV=1
tr|F1PA38|F1PA38_CANLF	C2 calcium dependent domain containing 4C OS=Canis lupus familiaris OX=9615 GN=C2CD4C PE=4 SV=2
tr|H9GW56|H9GW56_CANLF	DNA-directed DNA/RNA polymerase mu OS=Canis lupus familiaris OX=9615 PE=3 SV=2
tr|J9P146|J9P146_CANLF	Transmembrane protein 170B OS=Canis lupus familiaris OX=9615 GN=TMEM170B PE=4 SV=1
tr|F1PTL1|F1PTL1_CANLF	RAD23 homolog A, nucleotide excision repair protein OS=Canis lupus familiaris OX=9615 GN=RAD23A PE=4 SV=2
tr|F1PC15|F1PC15_CANLF	HHIP like 1 OS=Canis lupus familiaris OX=9615 GN=HHIPL1 PE=4 SV=2
tr|F1PVP7|F1PVP7_CANLF	Chromosome 18 C11orf95 homolog OS=Canis lupus familiaris OX=9615 GN=C18H11orf95 PE=4 SV=2
tr|F1P609|F1P609_CANLF	TBK1 binding protein 1 OS=Canis lupus familiaris OX=9615 GN=TBKBP1 PE=4 SV=2
tr|E2RDT2|E2RDT2_CANLF	Protein Wnt OS=Canis lupus familiaris OX=9615 GN=WNT8B PE=3 SV=1
tr|F1PNS9|F1PNS9_CANLF	GH3 domain containing OS=Canis lupus familiaris OX=9615 GN=GHDC PE=4 SV=2
tr|J9NZ03|J9NZ03_CANLF	RUN and FYVE domain containing 1 OS=Canis lupus familiaris OX=9615 GN=RUFY1 PE=4 SV=1
tr|E2QTX0|E2QTX0_CANLF	Calcium binding and coiled-coil domain 1 OS=Canis lupus familiaris OX=9615 GN=CALCOCO1 PE=4 SV=1
tr|F6V9Q0|F6V9Q0_CANLF	DNA fragmentation factor subunit alpha OS=Canis lupus familiaris OX=9615 GN=DFFA PE=4 SV=1
tr|A0A0A0MPD6|A0A0A0MPD6_CANLF	Histone-lysine N-methyltransferase OS=Canis lupus familiaris OX=9615 GN=SETD3 PE=3 SV=1
tr|E2RNG8|E2RNG8_CANLF	EF-hand and coiled-coil domain containing 1 OS=Canis lupus familiaris OX=9615 GN=EFCC1 PE=4 SV=2
tr|J9P240|J9P240_CANLF	Uncharacterized protein OS=Canis lupus familiaris OX=9615 PE=4 SV=1
tr|E2QSE3|E2QSE3_CANLF	Flotillin 1 OS=Canis lupus familiaris OX=9615 GN=FLOT1 PE=4 SV=1
tr|J9JHN4|J9JHN4_CANLF	Uncharacterized protein OS=Canis lupus familiaris OX=9615 PE=4 SV=1
tr|F1PS21|F1PS21_CANLF	Potassium voltage-gated channel subfamily C member 1 OS=Canis lupus familiaris OX=9615 GN=KCNC1 PE=3 SV=1
tr|E2RQ10|E2RQ10_CANLF	COMM domain containing 3 OS=Canis lupus familiaris OX=9615 GN=COMMD3 PE=4 SV=1
tr|J9NY20|J9NY20_CANLF	Uncharacterized protein OS=Canis lupus familiaris OX=9615 PE=4 SV=1
tr|F1P6H9|F1P6H9_CANLF	Cadherin related family member 3 OS=Canis lupus familiaris OX=9615 GN=CDHR3 PE=4 SV=1
tr|J9P8Y3|J9P8Y3_CANLF	Cleavage stimulation factor subunit 2 tau variant OS=Canis lupus familiaris OX=9615 GN=CSTF2T PE=4 SV=1
tr|E2RH70|E2RH70_CANLF	Glycerophosphodiester phosphodiesterase domain containing 5 OS=Canis lupus familiaris OX=9615 GN=GDPD5 PE=4 SV=2
tr|J9P0I7|J9P0I7_CANLF	Chromosome 2 C16orf78 homolog OS=Canis lupus familiaris OX=9615 GN=C2H16orf78 PE=4 SV=1
tr|J9NUJ5|J9NUJ5_CANLF	Death domain containing 1 OS=Canis lupus familiaris OX=9615 GN=DTHD1 PE=4 SV=1
tr|J9PBD2|J9PBD2_CANLF	Uncharacterized protein OS=Canis lupus familiaris OX=9615 PE=4 SV=1
tr|F1PB05|F1PB05_CANLF	Tsukushi, small leucine rich proteoglycan OS=Canis lupus familiaris OX=9615 GN=TSKU PE=4 SV=2
tr|E2QS34|E2QS34_CANLF	Cell division cycle and apoptosis regulator 1 OS=Canis lupus familiaris OX=9615 GN=CCAR1 PE=4 SV=1
tr|J9P994|J9P994_CANLF	Uncharacterized protein OS=Canis lupus familiaris OX=9615 PE=4 SV=1
tr|E2RFW4|E2RFW4_CANLF	DAB2, clathrin adaptor protein OS=Canis lupus familiaris OX=9615 GN=DAB2 PE=4 SV=2
tr|J9NTA0|J9NTA0_CANLF	Regulator of chromosome condensation 1 OS=Canis lupus familiaris OX=9615 GN=RCC1 PE=4 SV=1
tr|F1P850|F1P850_CANLF	Chromosome 9 C17orf53 homolog OS=Canis lupus familiaris OX=9615 GN=C9H17orf53 PE=4 SV=2
tr|J9NZ50|J9NZ50_CANLF	Uncharacterized protein OS=Canis lupus familiaris OX=9615 PE=4 SV=1
tr|E2RRM7|E2RRM7_CANLF	Uncharacterized protein OS=Canis lupus familiaris OX=9615 GN=SNU13 PE=4 SV=2
tr|E2RJ54|E2RJ54_CANLF	Uncharacterized protein OS=Canis lupus familiaris OX=9615 PE=4 SV=2
tr|O77753|O77753_CANLF	Type IIA procollagen OS=Canis lupus familiaris OX=9615 PE=2 SV=2
tr|J9NU32|J9NU32_CANLF	Coiled-coil domain containing 150 OS=Canis lupus familiaris OX=9615 GN=CCDC150 PE=4 SV=1
tr|J9P448|J9P448_CANLF	RNA binding motif protein 23 OS=Canis lupus familiaris OX=9615 GN=RBM23 PE=4 SV=1
tr|F1PLB0|F1PLB0_CANLF	SATB homeobox 1 OS=Canis lupus familiaris OX=9615 GN=SATB1 PE=4 SV=2
tr|F1P841|F1P841_CANLF	GC, vitamin D binding protein OS=Canis lupus familiaris OX=9615 GN=GC PE=4 SV=2
tr|E2QZX7|E2QZX7_CANLF	G protein-coupled receptor kinase OS=Canis lupus familiaris OX=9615 GN=GRK1 PE=3 SV=2
tr|E2R0Z6|E2R0Z6_CANLF	Junctophilin 1 OS=Canis lupus familiaris OX=9615 GN=JPH1 PE=4 SV=1
tr|E2RCL8|E2RCL8_CANLF	Coiled-coil domain containing 17 OS=Canis lupus familiaris OX=9615 GN=CCDC17 PE=4 SV=2
tr|F1PDX3|F1PDX3_CANLF	Coiled-coil domain containing 102A OS=Canis lupus familiaris OX=9615 GN=CCDC102A PE=4 SV=2
tr|F1PVT7|F1PVT7_CANLF	SH3 domain containing 21 OS=Canis lupus familiaris OX=9615 GN=SH3D21 PE=4 SV=2
tr|F1PD49|F1PD49_CANLF	Kinesin family member 7 OS=Canis lupus familiaris OX=9615 GN=KIF7 PE=3 SV=2
tr|E2QZU3|E2QZU3_CANLF	UBA domain containing 1 OS=Canis lupus familiaris OX=9615 GN=UBAC1 PE=4 SV=1
tr|E2QYQ7|E2QYQ7_CANLF	SPC25, NDC80 kinetochore complex component OS=Canis lupus familiaris OX=9615 GN=SPC25 PE=4 SV=1
tr|F1PK73|F1PK73_CANLF	Polypeptide N-acetylgalactosaminyltransferase OS=Canis lupus familiaris OX=9615 GN=GALNT13 PE=3 SV=2
tr|F1P9E5|F1P9E5_CANLF	Platelet-activating factor acetylhydrolase OS=Canis lupus familiaris OX=9615 GN=PLA2G7 PE=4 SV=1
tr|E2QZX1|E2QZX1_CANLF	Importin subunit alpha OS=Canis lupus familiaris OX=9615 GN=KPNA7 PE=3 SV=2
tr|J9NYX7|J9NYX7_CANLF	Oxidative stress induced growth inhibitor family member 2 OS=Canis lupus familiaris OX=9615 GN=OSGIN2 PE=4 SV=1
tr|J9PBP4|J9PBP4_CANLF	Uncharacterized protein OS=Canis lupus familiaris OX=9615 PE=4 SV=1
tr|J9PAS5|J9PAS5_CANLF	Myogenesis regulating glycosidase (putative) OS=Canis lupus familiaris OX=9615 GN=MYORG PE=3 SV=1
tr|E2QUV2|E2QUV2_CANLF	X-prolyl aminopeptidase 2 OS=Canis lupus familiaris OX=9615 GN=XPNPEP2 PE=3 SV=1
tr|F1PVE3|F1PVE3_CANLF	SAP domain containing ribonucleoprotein OS=Canis lupus familiaris OX=9615 GN=SARNP PE=4 SV=1
tr|E2QV07|E2QV07_CANLF	Structural maintenance of chromosomes protein OS=Canis lupus familiaris OX=9615 GN=SMC1A PE=3 SV=2
tr|E2R4N9|E2R4N9_CANLF	FYVE, RhoGEF and PH domain containing 1 OS=Canis lupus familiaris OX=9615 GN=FGD1 PE=4 SV=2
tr|E2RKY4|E2RKY4_CANLF	Methylmalonyl-CoA mutase OS=Canis lupus familiaris OX=9615 GN=MUT PE=4 SV=1
tr|E2RF27|E2RF27_CANLF	UBX domain protein 4 OS=Canis lupus familiaris OX=9615 GN=UBXN4 PE=4 SV=2
tr|X5IHJ5|X5IHJ5_CANLF	4F2 cell-surface antigen heavy chain OS=Canis lupus familiaris OX=9615 GN=4F2hc PE=2 SV=1
tr|J9P656|J9P656_CANLF	WD repeat domain 41 OS=Canis lupus familiaris OX=9615 GN=WDR41 PE=4 SV=1
tr|E2RLB7|E2RLB7_CANLF	tRNA phosphotransferase 1 OS=Canis lupus familiaris OX=9615 GN=TRPT1 PE=4 SV=1
tr|F6Y4F1|F6Y4F1_CANLF	Dachsous cadherin-related 1 OS=Canis lupus familiaris OX=9615 GN=DCHS1 PE=4 SV=1
tr|F1PGB2|F1PGB2_CANLF	Ethanolamine kinase 2 OS=Canis lupus familiaris OX=9615 GN=ETNK2 PE=4 SV=2
tr|E2QTP7|E2QTP7_CANLF	RAB4A, member RAS oncogene family OS=Canis lupus familiaris OX=9615 GN=RAB4A PE=4 SV=1
tr|E2R8P9|E2R8P9_CANLF	Uncharacterized protein OS=Canis lupus familiaris OX=9615 GN=cOR1R4 PE=3 SV=2
tr|Q38QA2|Q38QA2_CANLF	Actin (Fragment) OS=Canis lupus familiaris OX=9615 PE=2 SV=1
tr|F1Q2T4|F1Q2T4_CANLF	Uncharacterized protein OS=Canis lupus familiaris OX=9615 PE=4 SV=2
tr|J9P7X5|J9P7X5_CANLF	Protein phosphatase 2 scaffold subunit Abeta OS=Canis lupus familiaris OX=9615 GN=PPP2R1B PE=4 SV=1
tr|F1PXS7|F1PXS7_CANLF	Uncharacterized protein OS=Canis lupus familiaris OX=9615 PE=4 SV=1
tr|Q8SPS5|Q8SPS5_CANLF	Periplakin (Fragment) OS=Canis lupus familiaris OX=9615 PE=2 SV=1
tr|F1PXN2|F1PXN2_CANLF	Alpha-fetoprotein OS=Canis lupus familiaris OX=9615 GN=AFP PE=4 SV=1
tr|F6V3D2|F6V3D2_CANLF	Receptor associated protein of the synapse OS=Canis lupus familiaris OX=9615 GN=RAPSN PE=4 SV=1
tr|F1PGL5|F1PGL5_CANLF	Carboxypeptidase M OS=Canis lupus familiaris OX=9615 GN=CPM PE=4 SV=2
tr|J9P3Y7|J9P3Y7_CANLF	Ryanodine receptor 2 OS=Canis lupus familiaris OX=9615 GN=RYR2 PE=1 SV=1
tr|F1PHJ0|F1PHJ0_CANLF	Solute carrier family 30 member 9 OS=Canis lupus familiaris OX=9615 GN=SLC30A9 PE=4 SV=2
tr|E2RSY8|E2RSY8_CANLF	Hyaluronan mediated motility receptor OS=Canis lupus familiaris OX=9615 GN=HMMR PE=4 SV=2
tr|F1PZD4|F1PZD4_CANLF	Lysophosphatidylcholine acyltransferase 4 OS=Canis lupus familiaris OX=9615 GN=LPCAT4 PE=4 SV=2
tr|F6UWI0|F6UWI0_CANLF	Ribosomal protein S6 kinase OS=Canis lupus familiaris OX=9615 GN=RPS6KA2 PE=3 SV=1
tr|E2RNY3|E2RNY3_CANLF	OTU deubiquitinase 7A OS=Canis lupus familiaris OX=9615 GN=OTUD7A PE=4 SV=2
tr|E2R651|E2R651_CANLF	RalA binding protein 1 OS=Canis lupus familiaris OX=9615 GN=RALBP1 PE=4 SV=1
tr|J9P2P8|J9P2P8_CANLF	Glutamine rich 2 OS=Canis lupus familiaris OX=9615 GN=QRICH2 PE=4 SV=1
tr|E2RRB8|E2RRB8_CANLF	REST corepressor 3 OS=Canis lupus familiaris OX=9615 GN=RCOR3 PE=4 SV=2
tr|E2RE92|E2RE92_CANLF	Uncharacterized protein OS=Canis lupus familiaris OX=9615 GN=RNF113A PE=4 SV=2
tr|F6ULP0|F6ULP0_CANLF	Sosondowah ankyrin repeat domain family member A OS=Canis lupus familiaris OX=9615 GN=SOWAHA PE=4 SV=1
tr|E2RKR1|E2RKR1_CANLF	Keratin 20 OS=Canis lupus familiaris OX=9615 GN=KRT20 PE=3 SV=1
tr|E2R792|E2R792_CANLF	Histone deacetylase OS=Canis lupus familiaris OX=9615 GN=HDAC3 PE=3 SV=1
tr|J9P7H5|J9P7H5_CANLF	Palmitoyltransferase ZDHHC5 OS=Canis lupus familiaris OX=9615 GN=ZDHHC5 PE=4 SV=1
tr|H8ZYZ2|H8ZYZ2_CANLF	Transporter associated with antigen presentation 2 (Fragment) OS=Canis lupus familiaris OX=9615 GN=TAP2 PE=2 SV=1
tr|F6V735|F6V735_CANLF	Torsin OS=Canis lupus familiaris OX=9615 GN=TOR1A PE=3 SV=1
tr|J9NS79|J9NS79_CANLF	Transmembrane protein 236 OS=Canis lupus familiaris OX=9615 GN=TMEM236 PE=4 SV=1
tr|J9P019|J9P019_CANLF	tRNA methyltransferase 10C, mitochondrial RNase P subunit OS=Canis lupus familiaris OX=9615 GN=TRMT10C PE=4 SV=1
tr|F6XW36|F6XW36_CANLF	SH2 domain containing 4B OS=Canis lupus familiaris OX=9615 GN=SH2D4B PE=4 SV=1
tr|E2RA59|E2RA59_CANLF	Methionyl-tRNA synthetase 2, mitochondrial OS=Canis lupus familiaris OX=9615 GN=MARS2 PE=3 SV=1
tr|F1PRL5|F1PRL5_CANLF	Solute carrier family 25 member 5 OS=Canis lupus familiaris OX=9615 GN=SLC25A5 PE=3 SV=2
tr|E2RFD0|E2RFD0_CANLF	3-hydroxy-3-methylglutaryl-CoA lyase OS=Canis lupus familiaris OX=9615 GN=HMGCL PE=4 SV=1
tr|F1PY20|F1PY20_CANLF	Uncharacterized protein OS=Canis lupus familiaris OX=9615 PE=3 SV=1
tr|E2QX69|E2QX69_CANLF	Proprotein convertase subtilisin/kexin type 1 OS=Canis lupus familiaris OX=9615 GN=PCSK1 PE=3 SV=1
tr|E2RL20|E2RL20_CANLF	A-Raf proto-oncogene, serine/threonine kinase OS=Canis lupus familiaris OX=9615 GN=ARAF PE=4 SV=2
tr|F1P8D3|F1P8D3_CANLF	Heterogeneous nuclear ribonucleoprotein H3 OS=Canis lupus familiaris OX=9615 GN=HNRNPH3 PE=4 SV=2
tr|F1P7V2|F1P7V2_CANLF	MYD88, innate immune signal transduction adaptor OS=Canis lupus familiaris OX=9615 GN=MYD88 PE=4 SV=2
tr|E2QWI3|E2QWI3_CANLF	CD164 molecule like 2 OS=Canis lupus familiaris OX=9615 GN=CD164L2 PE=4 SV=1
tr|J9P013|J9P013_CANLF	Tight junction protein ZO-2 OS=Canis lupus familiaris OX=9615 GN=TJP2 PE=3 SV=1
tr|F6URE1|F6URE1_CANLF	DNA ligase OS=Canis lupus familiaris OX=9615 GN=LIG1 PE=3 SV=1
tr|E2RLS6|E2RLS6_CANLF	Coiled-coil domain containing 138 OS=Canis lupus familiaris OX=9615 GN=CCDC138 PE=4 SV=1
tr|F6XW58|F6XW58_CANLF	Ceramide synthase 3 OS=Canis lupus familiaris OX=9615 GN=CERS3 PE=4 SV=1
tr|E2RKQ1|E2RKQ1_CANLF	LIM and senescent cell antigen-like-containing domain protein OS=Canis lupus familiaris OX=9615 GN=LIMS1 PE=4 SV=2
tr|Q1HG71|Q1HG71_CANLF	Dual specificity mitogen activated protein kinase kinase 1 OS=Canis lupus familiaris OX=9615 PE=2 SV=1
tr|F1P774|F1P774_CANLF	Cytokine receptor like factor 1 OS=Canis lupus familiaris OX=9615 GN=CRLF1 PE=4 SV=2
tr|F1PDA7|F1PDA7_CANLF	Inositol polyphosphate-5-phosphatase E OS=Canis lupus familiaris OX=9615 GN=INPP5E PE=4 SV=2
tr|E2R450|E2R450_CANLF	Clathrin heavy chain linker domain-containing protein 1 OS=Canis lupus familiaris OX=9615 GN=CLHC1 PE=4 SV=2
sp|A2SXS5|MEN1_CANLF	Menin OS=Canis lupus familiaris OX=9615 GN=MEN1 PE=2 SV=1
tr|J9JHK2|J9JHK2_CANLF	Glucagon like peptide 1 receptor OS=Canis lupus familiaris OX=9615 GN=GLP1R PE=3 SV=1
tr|E2RFV8|E2RFV8_CANLF	TNF superfamily member 14 OS=Canis lupus familiaris OX=9615 GN=TNFSF14 PE=3 SV=2
tr|J9P8Y9|J9P8Y9_CANLF	Uncharacterized protein OS=Canis lupus familiaris OX=9615 PE=4 SV=1
tr|J9NZJ0|J9NZJ0_CANLF	Uncharacterized protein OS=Canis lupus familiaris OX=9615 PE=4 SV=1
tr|F1PY65|F1PY65_CANLF	UDP-glucose ceramide glucosyltransferase OS=Canis lupus familiaris OX=9615 GN=UGCG PE=4 SV=2
tr|F1PPQ3|F1PPQ3_CANLF	G1/S-specific cyclin-D1 OS=Canis lupus familiaris OX=9615 GN=CCND1 PE=3 SV=2
tr|J9P3C6|J9P3C6_CANLF	Uncharacterized protein OS=Canis lupus familiaris OX=9615 PE=4 SV=1
tr|E2RAE2|E2RAE2_CANLF	Electron transfer flavoprotein subunit alpha OS=Canis lupus familiaris OX=9615 GN=ETFA PE=4 SV=2
tr|E2QY14|E2QY14_CANLF	HERPUD family member 2 OS=Canis lupus familiaris OX=9615 GN=HERPUD2 PE=4 SV=1
tr|J9P7H1|J9P7H1_CANLF	Ring finger and CHY zinc finger domain containing 1 OS=Canis lupus familiaris OX=9615 GN=RCHY1 PE=4 SV=1
tr|F1PFR1|F1PFR1_CANLF	RAB33B, member RAS oncogene family OS=Canis lupus familiaris OX=9615 GN=RAB33B PE=4 SV=1
tr|E2RGI5|E2RGI5_CANLF	Guanine nucleotide-binding protein subunit gamma OS=Canis lupus familiaris OX=9615 GN=GNG5 PE=3 SV=2
tr|J9P5Z8|J9P5Z8_CANLF	Uncharacterized protein OS=Canis lupus familiaris OX=9615 PE=4 SV=1

## Sheet: Supplementary Material 2
Ontology	Term	Protein ID
biological_process	protein metabolic process	A0A0A0MPD2,A0A0A0MPD6,A0A0A0MPE1,A2SXS5,A6Q0K4,B6V8E6,D0VWQ3,D3YJ60,E2QRQ8,E2QRR5,E2QRU7,E2QRV2,E2QS13,E2QSE3,E2QT82,E2QTC7,E2QU31,E2QUE7,E2QUR2,E2QUS9,E2QUU1,E2QUU5,E2QUV7,E2QUY7,E2QV97,E2QVF9,E2QVG7,E2QW13,E2QW34,E2QWE0,E2QWE3,E2QWF5,E2QWG8,E2QWM4,E2QWM5,E2QWM9,E2QWY6,E2QX17,E2QX69,E2QXF2,E2QXF3,E2QXI3,E2QXM7,E2QXN9,E2QYB6,E2QYD0,E2QYU2,E2QYZ4,E2QZ69,E2QZB3,E2QZF6,E2QZV2,E2QZV5,E2QZX7,E2R027,E2…
biological_process	macromolecular complex subunit organization	A0A0A0MPD3,A0M8V0,B6V8E6,E2QRV2,E2QRX1,E2QSE3,E2QTC7,E2QTL3,E2QTN0,E2QU31,E2QUQ0,E2QUU1,E2QV07,E2QVF9,E2QW54,E2QWE2,E2QWF5,E2QWG8,E2QWL1,E2QWN7,E2QWU0,E2QX86,E2QXA5,E2QXR8,E2QXY7,E2QXZ2,E2QY07,E2QY08,E2QY30,E2QY31,E2QYQ7,E2QYU2,E2QZ05,E2QZ50,E2QZE7,E2QZF6,E2R0I8,E2R0Y4,E2R1C9,E2R1J6,E2R1S5,E2R2P0,E2R311,E2R413,E2R431,E2R498,E2R4A3,E2R4L7,E2R4X9,E2R543,E2R5N5,E2R792,E2R7F1,E2R7V4,E2R836,E2R8L3,E2R…
biological_process	cellular protein metabolic process	A0A0A0MPD2,A0A0A0MPD6,A0A0A0MPE1,A2SXS5,A6Q0K4,B6V8E6,D0VWQ3,D3YJ60,E2QRQ8,E2QRR5,E2QRU7,E2QRV2,E2QS13,E2QSE3,E2QT82,E2QTC7,E2QU31,E2QUE7,E2QUR2,E2QUS9,E2QUU1,E2QUU5,E2QUV7,E2QUY7,E2QV97,E2QVF9,E2QVG7,E2QW13,E2QW34,E2QWE0,E2QWE3,E2QWF5,E2QWG8,E2QWM4,E2QWM5,E2QWM9,E2QWY6,E2QX17,E2QXF2,E2QXF3,E2QXI3,E2QXM7,E2QXN9,E2QYB6,E2QYD0,E2QYU2,E2QYZ4,E2QZ69,E2QZB3,E2QZF6,E2QZV2,E2QZV5,E2QZX7,E2R030,E2R0B6,E2…
biological_process	cellular component organization	A0A0A0MPD3,A0A140T8E0,A0M8V0,A6Q0K4,B6V8E6,E2QRV2,E2QRX1,E2QS13,E2QSB9,E2QSE3,E2QSF4,E2QTC7,E2QTL3,E2QTN0,E2QTP7,E2QU10,E2QU31,E2QUG4,E2QUI7,E2QUK0,E2QUQ0,E2QUU1,E2QUU5,E2QUV3,E2QV07,E2QVF9,E2QW13,E2QW54,E2QW90,E2QWD3,E2QWE2,E2QWE3,E2QWF5,E2QWG8,E2QWL1,E2QWM4,E2QWM5,E2QWN7,E2QWR3,E2QWU0,E2QX86,E2QXA5,E2QXD1,E2QXF0,E2QXF2,E2QXR8,E2QXW5,E2QXY5,E2QXY7,E2QXZ2,E2QY07,E2QY08,E2QY30,E2QY31,E2QYC2,E2QYN4…
biological_process	cellular component organization or biogenesis	A0A0A0MPD3,A0A140T8E0,A0M8V0,A6Q0K4,B6V8E6,E2QRV2,E2QRX1,E2QS13,E2QSB9,E2QSE3,E2QSF4,E2QTC7,E2QTL3,E2QTN0,E2QTP7,E2QU10,E2QU31,E2QUE7,E2QUG4,E2QUI7,E2QUK0,E2QUQ0,E2QUU1,E2QUU5,E2QUV3,E2QV07,E2QVF9,E2QW13,E2QW54,E2QW90,E2QWD3,E2QWE2,E2QWE3,E2QWF5,E2QWG8,E2QWL1,E2QWM4,E2QWM5,E2QWN7,E2QWR3,E2QWU0,E2QX86,E2QXA5,E2QXD1,E2QXF0,E2QXF2,E2QXR8,E2QXW5,E2QXY5,E2QXY7,E2QXZ2,E2QY07,E2QY08,E2QY30,E2QY31,E2QYC2…
biological_process	cellular component biogenesis	A0A0A0MPD3,A0M8V0,A6Q0K4,B6V8E6,E2QRX1,E2QSE3,E2QTC7,E2QTL3,E2QU31,E2QUE7,E2QUI7,E2QUQ0,E2QUU1,E2QV07,E2QVF9,E2QW54,E2QWE2,E2QWF5,E2QWG8,E2QWL1,E2QWN7,E2QWR3,E2QWU0,E2QXA5,E2QXR8,E2QXY7,E2QXZ2,E2QY07,E2QY08,E2QY30,E2QYU2,E2QYZ9,E2QZE7,E2QZF6,E2R030,E2R0I8,E2R0Y4,E2R1C9,E2R1J6,E2R1S5,E2R1X9,E2R2K4,E2R311,E2R413,E2R431,E2R498,E2R4L7,E2R4N9,E2R4Q2,E2R4X9,E2R543,E2R5N5,E2R792,E2R7F1,E2R7V4,E2R836,E2R…
biological_process	cellular component assembly	A0A0A0MPD3,A0M8V0,A6Q0K4,B6V8E6,E2QRX1,E2QSE3,E2QTC7,E2QTL3,E2QU31,E2QUI7,E2QUQ0,E2QUU1,E2QV07,E2QVF9,E2QW54,E2QWE2,E2QWF5,E2QWG8,E2QWL1,E2QWN7,E2QWR3,E2QWU0,E2QXA5,E2QXR8,E2QXY7,E2QXZ2,E2QY07,E2QY08,E2QY30,E2QYU2,E2QZE7,E2QZF6,E2R030,E2R0I8,E2R0Y4,E2R1C9,E2R1J6,E2R1S5,E2R1X9,E2R2K4,E2R311,E2R413,E2R431,E2R498,E2R4L7,E2R4N9,E2R4Q2,E2R4X9,E2R543,E2R5N5,E2R792,E2R7F1,E2R7V4,E2R836,E2R8L3,E2R912,E2R…
biological_process	macromolecular complex assembly	A0A0A0MPD3,A0M8V0,B6V8E6,E2QRX1,E2QSE3,E2QTC7,E2QTL3,E2QU31,E2QUQ0,E2QUU1,E2QV07,E2QVF9,E2QWE2,E2QWF5,E2QWG8,E2QWL1,E2QWN7,E2QWU0,E2QXA5,E2QXR8,E2QXY7,E2QXZ2,E2QY30,E2QYU2,E2QZE7,E2QZF6,E2R0I8,E2R0Y4,E2R1C9,E2R1J6,E2R1S5,E2R311,E2R413,E2R431,E2R4L7,E2R4X9,E2R543,E2R5N5,E2R792,E2R7F1,E2R7V4,E2R836,E2R8L3,E2R990,E2RAN6,E2RAT8,E2RBU1,E2RC33,E2RCF2,E2RCI8,E2RCZ7,E2RD65,E2RD72,E2RDE0,E2RDF9,E2RDP4,E2R…
biological_process	electron transport chain	E2RR27,F1Q1X9,J9P3C5,J9P556,P00011
biological_process	organic substance metabolic process	A0A0A0MPC5,A0A0A0MPD0,A0A0A0MPD2,A0A0A0MPD3,A0A0A0MPD6,A0A0A0MPE1,A0A0B4J194,A0A0B4J195,A0A140T8E2,A0A2Z5XAD4,A2SXS5,A6Q0K4,B4YY02,B6V8E6,D0VWQ3,D3YJ60,E2QRQ8,E2QRR5,E2QRU7,E2QRV2,E2QRX1,E2QS13,E2QS34,E2QS94,E2QSE3,E2QT82,E2QTC7,E2QTX0,E2QU31,E2QU97,E2QUE2,E2QUE7,E2QUI9,E2QUJ4,E2QUK0,E2QUR2,E2QUR8,E2QUS9,E2QUU1,E2QUU5,E2QUV7,E2QUY7,E2QV07,E2QV08,E2QV12,E2QV97,E2QVA7,E2QVF9,E2QVG1,E2QVG7,E2QVN6,E2…
biological_process	respiratory electron transport chain	E2RR27,F1Q1X9,J9P3C5,J9P556,P00011
biological_process	protein folding	E2QTC7,E2QUS9,E2QUU5,E2QWF5,E2QYU2,E2R0L9,E2R0T6,E2R198,E2R297,E2R2G5,E2R7F3,E2R7L1,E2RAU5,E2RAZ6,E2RB79,E2RC92,E2RCN3,E2RD86,E2RLL6,E2RLS3,E2RMC1,E2RN10,E2RNL3,E2RNW5,E2RQ81,E2RQW2,F1P8B4,F1P8N6,F1PDX9,F1PGY1,F1PHE6,F1PIC7,F1PL97,F1PLU5,F1PLV2,F1PME4,F1PP91,F1PS57,F1PWM7,F1PYE3,F1Q1F5,F1Q331,F6UYJ9,F6V0D8,F6V5M4,F6V735,F6V9Q0,F6XQ49,G1K268,H9GW49,J9NS87,J9NT37,J9NTX4,J9NU25,J9NUZ6,J9NV93,J9NXS3,…
biological_process	protein complex subunit organization	A0A0A0MPD3,A0M8V0,B6V8E6,E2QRV2,E2QRX1,E2QSE3,E2QTL3,E2QU31,E2QUQ0,E2QV07,E2QW54,E2QWE2,E2QWF5,E2QWL1,E2QWN7,E2QWU0,E2QXA5,E2QXY7,E2QY07,E2QY08,E2QY31,E2QYQ7,E2QYU2,E2QZ05,E2QZ50,E2QZE7,E2R0I8,E2R0Y4,E2R1C9,E2R2P0,E2R311,E2R413,E2R431,E2R498,E2R4L7,E2R543,E2R5N5,E2R792,E2R7F1,E2R7V4,E2R836,E2R912,E2R9S7,E2RAN6,E2RAT8,E2RB34,E2RBM3,E2RC33,E2RCF2,E2RCI8,E2RD65,E2RD72,E2RDE0,E2RDP4,E2RFD0,E2RFV2,E2R…
biological_process	cellular respiration	A0A2Z5XAD4,A6Q0K4,E2QV08,E2RGR9,E2RR27,F1PV92,F1PYG8,F1PZA1,F1Q1X9,J9P3C5,J9P556,P00011
biological_process	catabolic process	A0A0A0MPD0,A0A0B4J194,A0A0B4J195,E2QRU7,E2QS13,E2QS94,E2QT82,E2QTL3,E2QUY7,E2QVU9,E2QW34,E2QWM9,E2QWR3,E2QX17,E2QX53,E2QXD1,E2QXF2,E2QXM7,E2QXS7,E2QY31,E2QYN4,E2QYU2,E2QZB3,E2QZV2,E2R097,E2R0B6,E2R0I8,E2R0I9,E2R0J2,E2R129,E2R1C3,E2R1J6,E2R1S5,E2R1V2,E2R2C3,E2R3R2,E2R412,E2R4A5,E2R4H4,E2R4L7,E2R4N9,E2R513,E2R599,E2R5B9,E2R5N5,E2R651,E2R6Q7,E2R755,E2R7P6,E2R7S6,E2R857,E2R8A8,E2R8E3,E2R8L3,E2R8Y3,E2…
biological_process	regulation of cellular component organization	A0A140T8E0,A0M8V0,A6Q0K4,B6V8E6,E2QRV2,E2QRX1,E2QSB9,E2QSE3,E2QTL3,E2QTP7,E2QUI7,E2QUQ0,E2QUV3,E2QV07,E2QW13,E2QW54,E2QW90,E2QWD3,E2QWL1,E2QWM5,E2QWN7,E2QWR3,E2QWU0,E2QXA5,E2QXD1,E2QXY7,E2QY31,E2QYN4,E2QYU2,E2QZE7,E2QZN8,E2R030,E2R0I8,E2R0L9,E2R0R3,E2R1C9,E2R1M6,E2R1X9,E2R1Z0,E2R2K4,E2R2N2,E2R2P0,E2R3V7,E2R400,E2R413,E2R498,E2R4A3,E2R4L7,E2R4N9,E2R7F1,E2R7V4,E2R912,E2R990,E2R9F0,E2R9K4,E2RAG6,E2R…
biological_process	organic substance catabolic process	A0A0A0MPD0,A0A0B4J194,A0A0B4J195,E2QRU7,E2QS13,E2QS94,E2QT82,E2QUY7,E2QVU9,E2QW34,E2QWM9,E2QWR3,E2QX17,E2QX53,E2QXF2,E2QXM7,E2QXS7,E2QY31,E2QYN4,E2QYU2,E2QZB3,E2QZV2,E2R097,E2R0B6,E2R0I8,E2R0I9,E2R0J2,E2R129,E2R1C3,E2R1J6,E2R1S5,E2R1V2,E2R2C3,E2R3R2,E2R412,E2R4A5,E2R4H4,E2R4L7,E2R4N9,E2R513,E2R599,E2R5N5,E2R651,E2R6Q7,E2R755,E2R7P6,E2R7S6,E2R857,E2R8A8,E2R8E3,E2R8L3,E2R8Y3,E2R990,E2R9E3,E2R9K4,E2…
biological_process	primary metabolic process	A0A0A0MPC5,A0A0A0MPD0,A0A0A0MPD2,A0A0A0MPD3,A0A0A0MPD6,A0A0A0MPE1,A0A0B4J194,A0A0B4J195,A0A2Z5XAD4,A2SXS5,A6Q0K4,B4YY02,B6V8E6,D0VWQ3,D3YJ60,E2QRQ8,E2QRR5,E2QRU7,E2QRV2,E2QS13,E2QS34,E2QSE3,E2QT82,E2QTC7,E2QTX0,E2QU31,E2QU97,E2QUE2,E2QUE7,E2QUI9,E2QUJ4,E2QUK0,E2QUR2,E2QUR8,E2QUS9,E2QUU1,E2QUU5,E2QUV7,E2QUY7,E2QV07,E2QV08,E2QV12,E2QV97,E2QVA7,E2QVF9,E2QVG1,E2QVG7,E2QVN6,E2QW13,E2QW27,E2QW34,E2QW90…
biological_process	cellular macromolecular complex assembly	A0M8V0,E2QUU1,E2QWE2,E2QWF5,E2QWG8,E2QWL1,E2QWU0,E2QXA5,E2QXR8,E2QXY7,E2QXZ2,E2QY30,E2QYU2,E2QZE7,E2QZF6,E2R1C9,E2R1J6,E2R1S5,E2R413,E2R4X9,E2R5N5,E2R7V4,E2R836,E2R8L3,E2R990,E2RAT8,E2RBU1,E2RC33,E2RCZ7,E2RD65,E2RD72,E2RDF9,E2RDP4,E2REJ7,E2REK3,E2RFV2,E2RGD3,E2RGG6,E2RH29,E2RH48,E2RIQ2,E2RIQ8,E2RIW7,E2RJ26,E2RJW9,E2RKS4,E2RL17,E2RMK6,E2RMT4,E2RN45,E2RNB6,E2RND5,E2RNF2,E2RNT3,E2RNX1,E2RPH1,E2RPI9,…
biological_process	energy derivation by oxidation of organic compounds	A0A2Z5XAD4,A6Q0K4,E2QV08,E2R5R9,E2RFC5,E2RGR9,E2RR27,F1PB77,F1PSM2,F1PUL4,F1PV92,F1PX32,F1PYG8,F1PZA1,F1PZU9,F1Q0L3,F1Q1X9,G1K296,J9P3C5,J9P556,P00011
biological_process	oxidative phosphorylation	A6Q0K4,E2R412,E2R4L7,E2RR27,F1Q1X9,F6XY66,J9P3C5,J9P556,P00011
biological_process	intracellular transport	A0A0A0MPC5,A4GT58,E2QRX1,E2QS13,E2QTL3,E2QTN0,E2QTP7,E2QUQ0,E2QUU5,E2QVP6,E2QW79,E2QWE3,E2QWM5,E2QWN7,E2QWX5,E2QXY7,E2QY31,E2QYB6,E2QYN4,E2QZX1,E2R057,E2R0K8,E2R0S6,E2R0T6,E2R1S5,E2R236,E2R2G5,E2R2P0,E2R3V7,E2R446,E2R498,E2R4A3,E2R4Q2,E2R507,E2R667,E2R792,E2R7F1,E2R812,E2R832,E2R8A2,E2R8C6,E2R8Y3,E2R9A2,E2R9K4,E2RA27,E2RAE6,E2RAT6,E2RAT8,E2RAU5,E2RAZ6,E2RB31,E2RB34,E2RC33,E2RDX0,E2REI0,E2REI7,E2R…
biological_process	ATP synthesis coupled electron transport	E2RR27,F1Q1X9,J9P3C5,J9P556,P00011
biological_process	cytoplasmic transport	A0A0A0MPC5,E2QS13,E2QTL3,E2QUU5,E2QWE3,E2QWM5,E2QWX5,E2QXY7,E2QZX1,E2R1S5,E2R236,E2R2G5,E2R2P0,E2R3V7,E2R446,E2R4A3,E2R667,E2R792,E2R7F1,E2R812,E2R832,E2R8Y3,E2R9A2,E2R9K4,E2RA27,E2RAT6,E2RAT8,E2RAU5,E2RAZ6,E2RB31,E2RB34,E2RC33,E2RDX0,E2REI7,E2REK5,E2REK6,E2REP2,E2RF06,E2RFI6,E2RFW4,E2RH09,E2RH29,E2RHA6,E2RLQ9,E2RND5,E2RNT3,E2RNW5,E2RPG3,E2RPG9,E2RPH1,E2RRB7,E2RRC6,E2RSG8,E2RSI6,E2RSX0,E2RT63,E2R…
biological_process	macromolecule metabolic process	A0A0A0MPC5,A0A0A0MPD2,A0A0A0MPD6,A0A0A0MPE1,A0A140T8E2,A2SXS5,A6Q0K4,B6V8E6,D0VWQ3,D3YJ60,E2QRQ8,E2QRR5,E2QRU7,E2QRV2,E2QRX1,E2QS13,E2QS34,E2QSE3,E2QT82,E2QTC7,E2QTX0,E2QU31,E2QUE2,E2QUE7,E2QUJ4,E2QUK0,E2QUR2,E2QUR8,E2QUS9,E2QUU1,E2QUU5,E2QUV7,E2QUY7,E2QV07,E2QV97,E2QVF9,E2QVG1,E2QVG7,E2QVN6,E2QW13,E2QW27,E2QW34,E2QWE0,E2QWE3,E2QWF5,E2QWG8,E2QWM4,E2QWM5,E2QWM9,E2QWY6,E2QX17,E2QX33,E2QX69,E2QX86,E…
biological_process	cellular process	A0A077LQA5,A0A0A0MPC5,A0A0A0MPD0,A0A0A0MPD2,A0A0A0MPD3,A0A0A0MPD6,A0A0A0MPE1,A0A0B4J194,A0A0B4J195,A0A0B5CXY9,A0A140T8E0,A0A140T8E2,A0A2Z5XAD4,A0M8U6,A0M8V0,A1DZY5,A2SXS5,A4GT58,A6Q0K4,B4YY02,B6V8E6,D0VWQ3,D3YJ60,D5IGD0,E2QRQ8,E2QRR5,E2QRU7,E2QRV2,E2QRX1,E2QS13,E2QS34,E2QSB9,E2QSE3,E2QSF4,E2QT82,E2QT97,E2QTC7,E2QTL3,E2QTN0,E2QTP7,E2QTT8,E2QTX0,E2QU10,E2QU31,E2QU97,E2QUE2,E2QUE7,E2QUG4,E2QUH1,E2QU…
biological_process	regulation of protein metabolic process	A2SXS5,B6V8E6,D3YJ60,E2QRV2,E2QS13,E2QSE3,E2QT82,E2QUE7,E2QUR2,E2QUV7,E2QUY7,E2QVF9,E2QW13,E2QWE3,E2QWM4,E2QWM5,E2QWM9,E2QXM7,E2QXN9,E2QYU2,E2QZB3,E2QZV2,E2QZV5,E2R030,E2R0G3,E2R0I8,E2R0J2,E2R0X9,E2R1J6,E2R1S5,E2R2N2,E2R2P0,E2R3V7,E2R498,E2R4A3,E2R4A5,E2R4L7,E2R4R8,E2R5P4,E2R5Q5,E2R6L1,E2R755,E2R771,E2R792,E2R7J9,E2R7V4,E2R8A8,E2R8R8,E2R8W7,E2R8Y3,E2R912,E2R990,E2R9E3,E2R9K4,E2RAA0,E2RAG6,E2RAI8,…
biological_process	cellular catabolic process	A0A0B4J194,A0A0B4J195,E2QRU7,E2QS13,E2QT82,E2QTL3,E2QUY7,E2QVU9,E2QW34,E2QWM9,E2QWR3,E2QX17,E2QX53,E2QXD1,E2QXF2,E2QXM7,E2QXS7,E2QY31,E2QYN4,E2QYU2,E2QZB3,E2QZV2,E2R097,E2R0B6,E2R0I8,E2R129,E2R1C3,E2R1J6,E2R1S5,E2R1V2,E2R3R2,E2R412,E2R4A5,E2R4H4,E2R4L7,E2R4N9,E2R513,E2R599,E2R5B9,E2R5N5,E2R651,E2R6Q7,E2R7P6,E2R7S6,E2R857,E2R8A8,E2R8E3,E2R8L3,E2R990,E2R9E3,E2R9R1,E2RAE2,E2RAG6,E2RAN6,E2RBR6,E2RCI5…
biological_process	translation	A0A0A0MPD2,A0A0A0MPE1,D0VWQ3,E2QRQ8,E2QRR5,E2QU31,E2QUE7,E2QUR2,E2QUU1,E2QV97,E2QVG7,E2QWG8,E2QWY6,E2QXF3,E2QXI3,E2QZ69,E2R149,E2R1J6,E2R1S5,E2R3D3,E2R4D5,E2R4F5,E2R4L7,E2R4N7,E2R574,E2R5Q5,E2R771,E2R7J9,E2R8A8,E2R8R8,E2R990,E2R9V0,E2R9Y9,E2RA59,E2RBD1,E2RBM3,E2RCL4,E2RDZ4,E2REK3,E2RER1,E2RFR0,E2RGG6,E2RGG9,E2RH47,E2RHR7,E2RHW7,E2RIA8,E2RIQ8,E2RIX2,E2RJU3,E2RKS4,E2RL17,E2RMK6,E2RNQ8,E2RNT3,E2RP05…
biological_process	macromolecule catabolic process	E2QRU7,E2QS13,E2QT82,E2QUY7,E2QW34,E2QWM9,E2QX17,E2QXF2,E2QXM7,E2QYU2,E2QZB3,E2QZV2,E2R0B6,E2R0I8,E2R0J2,E2R129,E2R1C3,E2R1J6,E2R1V2,E2R3R2,E2R412,E2R4A5,E2R4H4,E2R5N5,E2R6Q7,E2R7P6,E2R7S6,E2R8A8,E2R8L3,E2R8Y3,E2R990,E2R9E3,E2R9K4,E2RAG6,E2RBR6,E2RCI5,E2RCP9,E2RD70,E2RD94,E2RDP4,E2RDZ4,E2REF0,E2RF02,E2RF27,E2RF39,E2RF52,E2RFW4,E2RH09,E2RH48,E2RH91,E2RIM3,E2RIY4,E2RJ26,E2RJH3,E2RKJ1,E2RKR4,E2RKT9,…
biological_process	protein localization	A4GT58,B6V8E6,D3YJ60,E2QRX1,E2QS13,E2QSE3,E2QTC7,E2QTL3,E2QTP7,E2QUQ0,E2QUU5,E2QVP6,E2QWE3,E2QWF5,E2QWM4,E2QWM5,E2QWN7,E2QWR3,E2QXA5,E2QXY7,E2QY31,E2QYB6,E2QYU2,E2QZ05,E2QZX1,E2R057,E2R0D2,E2R0K8,E2R0L9,E2R236,E2R2C3,E2R2G5,E2R2P0,E2R3V7,E2R4Q2,E2R580,E2R667,E2R792,E2R7V4,E2R812,E2R832,E2R8A2,E2R8C6,E2R8L3,E2R912,E2R9A2,E2R9K4,E2R9M1,E2R9P2,E2R9S7,E2RA27,E2RAE6,E2RAT6,E2RAT8,E2RAU5,E2RAZ6,E2RB34,…
biological_process	actin cytoskeleton organization	A0M8V0,E2QUQ0,E2QW54,E2QWD3,E2QWL1,E2QWN7,E2QWU0,E2QXA5,E2QXW5,E2QXY5,E2QXY7,E2QY07,E2QY08,E2QY31,E2QZ50,E2QZE7,E2QZV5,E2R0F2,E2R1C9,E2R1M6,E2R413,E2R498,E2R4N9,E2R5Q1,E2R7V4,E2R836,E2R912,E2R9S7,E2RB32,E2RD65,E2RD72,E2RDU7,E2RGD3,E2RGF3,E2RH53,E2RIQ2,E2RJT2,E2RJW9,E2RMT4,E2RNT5,E2RR96,E2RRC6,E2RSI6,E2RT60,F1P679,F1P6B7,F1P7F8,F1P7P3,F1P8N6,F1P912,F1P9B2,F1P9J3,F1P9W2,F1PA22,F1PAG6,F1PBG7,F1PCT1,…
biological_process	protein complex assembly	A0A0A0MPD3,A0M8V0,B6V8E6,E2QRX1,E2QSE3,E2QTL3,E2QU31,E2QUQ0,E2QV07,E2QWE2,E2QWF5,E2QWL1,E2QWN7,E2QWU0,E2QXA5,E2QXY7,E2QYU2,E2QZE7,E2R0I8,E2R0Y4,E2R1C9,E2R311,E2R413,E2R431,E2R4L7,E2R543,E2R5N5,E2R792,E2R7F1,E2R7V4,E2R836,E2RAN6,E2RAT8,E2RC33,E2RCF2,E2RCI8,E2RD65,E2RD72,E2RDE0,E2RDP4,E2RFD0,E2RFV2,E2RGD3,E2RGG9,E2RGR3,E2RH29,E2RH47,E2RH48,E2RIQ2,E2RJ26,E2RJW9,E2RKS4,E2RLQ9,E2RMT4,E2RNB6,E2RND5,E2R…
biological_process	protein complex biogenesis	A0A0A0MPD3,A0M8V0,B6V8E6,E2QRX1,E2QSE3,E2QTL3,E2QU31,E2QUQ0,E2QV07,E2QWE2,E2QWF5,E2QWL1,E2QWN7,E2QWU0,E2QXA5,E2QXY7,E2QYU2,E2QZE7,E2R0I8,E2R0Y4,E2R1C9,E2R311,E2R413,E2R431,E2R4L7,E2R543,E2R5N5,E2R792,E2R7F1,E2R7V4,E2R836,E2RAN6,E2RAT8,E2RC33,E2RCF2,E2RCI8,E2RD65,E2RD72,E2RDE0,E2RDP4,E2RFD0,E2RFV2,E2RGD3,E2RGG9,E2RGR3,E2RH29,E2RH47,E2RH48,E2RIQ2,E2RJ26,E2RJW9,E2RKS4,E2RLQ9,E2RMT4,E2RNB6,E2RND5,E2R…
biological_process	cytoskeleton organization	A0M8V0,B6V8E6,E2QRV2,E2QSB9,E2QSF4,E2QUQ0,E2QV07,E2QW54,E2QWD3,E2QWE2,E2QWL1,E2QWN7,E2QWR3,E2QWU0,E2QXA5,E2QXW5,E2QXY5,E2QXY7,E2QY07,E2QY08,E2QY31,E2QYC2,E2QYQ7,E2QZ05,E2QZ50,E2QZE7,E2QZV5,E2R0F2,E2R1C9,E2R1M6,E2R2P0,E2R413,E2R498,E2R4N9,E2R5Q1,E2R792,E2R7V4,E2R836,E2R912,E2R9K4,E2R9S7,E2RB32,E2RD65,E2RD72,E2RDE0,E2RDU7,E2RFV2,E2RGD3,E2RGF3,E2RGR3,E2RH53,E2RH71,E2RIL1,E2RIQ2,E2RJT2,E2RJW9,E2RKR1,…
biological_process	cellular localization	A0A0A0MPC5,A4GT58,B6V8E6,D3YJ60,E2QRX1,E2QS13,E2QSE3,E2QTC7,E2QTL3,E2QTN0,E2QTP7,E2QUQ0,E2QUU5,E2QVP6,E2QW13,E2QW79,E2QWE3,E2QWM4,E2QWM5,E2QWN7,E2QWR3,E2QWX5,E2QXY7,E2QY31,E2QYB6,E2QYN4,E2QZ05,E2QZX1,E2R057,E2R0D2,E2R0K8,E2R0S6,E2R0T6,E2R1S5,E2R236,E2R2C3,E2R2G5,E2R2K4,E2R2P0,E2R3V7,E2R446,E2R498,E2R4A3,E2R4Q2,E2R507,E2R580,E2R667,E2R792,E2R7F1,E2R7K6,E2R7V4,E2R812,E2R832,E2R836,E2R8A2,E2R8C6,E2R…
biological_process	protein catabolic process	E2QRU7,E2QS13,E2QT82,E2QUY7,E2QW34,E2QWM9,E2QX17,E2QXF2,E2QXM7,E2QYU2,E2QZB3,E2QZV2,E2R0B6,E2R0I8,E2R0J2,E2R129,E2R1C3,E2R1V2,E2R3R2,E2R4A5,E2R4H4,E2R5N5,E2R6Q7,E2R8A8,E2R8L3,E2R8Y3,E2R9E3,E2R9K4,E2RAG6,E2RBR6,E2RCP9,E2RD70,E2RD94,E2RDP4,E2REF0,E2RF02,E2RF27,E2RF39,E2RF52,E2RFW4,E2RH48,E2RIY4,E2RJ26,E2RJH3,E2RKJ1,E2RKR4,E2RKT9,E2RLQ9,E2RLS3,E2RMN2,E2RN00,E2RNA6,E2RNY3,E2RPC0,E2RPJ4,E2RPS0,E2RPY9,…
biological_process	positive regulation of cellular component organization	A0A140T8E0,B6V8E6,E2QRX1,E2QSE3,E2QTL3,E2QUI7,E2QUQ0,E2QUV3,E2QWD3,E2QWM5,E2QWN7,E2QWR3,E2QWU0,E2QXY7,E2QY31,E2QYN4,E2QYU2,E2QZN8,E2R030,E2R0I8,E2R0L9,E2R2N2,E2R2P0,E2R498,E2R7F1,E2R7V4,E2R912,E2R990,E2RB79,E2RBV0,E2RCF2,E2RCV4,E2RCZ7,E2RD65,E2RD72,E2RF98,E2RFV8,E2RFW4,E2RGD3,E2RGG9,E2RH47,E2RH48,E2RIQ2,E2RLL6,E2RLQ9,E2RMT4,E2RN10,E2RPE3,E2RR96,E2RRD2,E2RTD3,E2RTE0,E2RTK7,F1P679,F1P6B7,F1P6H7,F1P…
biological_process	cellular macromolecule catabolic process	E2QRU7,E2QS13,E2QT82,E2QUY7,E2QW34,E2QWM9,E2QX17,E2QXF2,E2QXM7,E2QYU2,E2QZB3,E2QZV2,E2R0B6,E2R0I8,E2R129,E2R1C3,E2R1J6,E2R1V2,E2R3R2,E2R412,E2R4A5,E2R4H4,E2R5N5,E2R6Q7,E2R7P6,E2R7S6,E2R8A8,E2R8L3,E2R990,E2R9E3,E2RAG6,E2RBR6,E2RCI5,E2RCP9,E2RD70,E2RD94,E2RDP4,E2RDZ4,E2REF0,E2RF02,E2RF27,E2RF39,E2RF52,E2RFW4,E2RH09,E2RH91,E2RIM3,E2RIY4,E2RJ26,E2RJH3,E2RKJ1,E2RKR4,E2RKT9,E2RLQ9,E2RLS3,E2RMN2,E2RN00,…
biological_process	macromolecule localization	A4GT58,B6V8E6,D3YJ60,E2QRX1,E2QS13,E2QSE3,E2QTC7,E2QTL3,E2QTP7,E2QUQ0,E2QUR2,E2QUU5,E2QVP6,E2QW13,E2QW54,E2QW79,E2QWE3,E2QWF5,E2QWM4,E2QWM5,E2QWN7,E2QWR3,E2QXA5,E2QXY7,E2QY31,E2QYB6,E2QYU2,E2QZ05,E2QZX1,E2R057,E2R0D2,E2R0K8,E2R0L9,E2R236,E2R2C3,E2R2G5,E2R2P0,E2R3V7,E2R4A3,E2R4Q2,E2R507,E2R580,E2R667,E2R792,E2R7V4,E2R812,E2R832,E2R8A2,E2R8C6,E2R8L3,E2R912,E2R9A2,E2R9K4,E2R9M1,E2R9P2,E2R9S7,E2RA27,…
biological_process	ribonucleoprotein complex subunit organization	E2QTN0,E2QUU1,E2QWG8,E2QXZ2,E2QZF6,E2R1J6,E2R1S5,E2R4X9,E2R8L3,E2R990,E2RBU1,E2RC33,E2REJ7,E2REK3,E2RGG6,E2RIQ8,E2RIW7,E2RKS4,E2RL17,E2RLQ9,E2RMK6,E2RN45,E2RNT3,E2RPH1,E2RQ80,E2RQC9,E2RQP6,E2RR01,E2RR58,E2RSR5,E2RSS5,F1P7B0,F1P969,F1PDH7,F1PGD7,F1PGY9,F1PHR6,F1PK74,F1PKF6,F1PPR0,F1PQZ7,F1PR95,F1PSI7,F1PTE0,F1PU02,F1PUX4,F1PV40,F1Q1T5,F1Q424,F6UN31,F6UQI5,F6XCI1,J9JHJ2,J9NRM1,J9NSD0,J9NTR8,J9NVU2,…
biological_process	negative regulation of biological process	A0A140T8E2,A0M8U6,A0M8V0,A2SXS5,A4GT58,A6Q0K4,B4YY02,B6V8E6,D5IGD0,E2QRQ8,E2QRV2,E2QRX1,E2QS13,E2QSB9,E2QT82,E2QTC7,E2QUE7,E2QUQ0,E2QUR2,E2QUV3,E2QUV7,E2QV07,E2QVF9,E2QVG1,E2QW13,E2QW54,E2QWD3,E2QWE0,E2QWE3,E2QWL1,E2QWM4,E2QWM9,E2QWR3,E2QX33,E2QX86,E2QXA5,E2QXA6,E2QXC6,E2QXD1,E2QXF2,E2QXM7,E2QY08,E2QY30,E2QY31,E2QYK6,E2QYN4,E2QYU2,E2QYZ4,E2QZE7,E2QZN8,E2QZV2,E2QZV5,E2R030,E2R0D2,E2R0G3,E2R0I8,E2R…
biological_process	ribonucleoprotein complex assembly	E2QUU1,E2QWG8,E2QXZ2,E2QZF6,E2R1J6,E2R1S5,E2R4X9,E2R8L3,E2R990,E2RBU1,E2RC33,E2REJ7,E2REK3,E2RGG6,E2RIQ8,E2RIW7,E2RKS4,E2RL17,E2RMK6,E2RN45,E2RNT3,E2RPH1,E2RQ80,E2RQC9,E2RQP6,E2RR01,E2RR58,E2RSR5,E2RSS5,F1P7B0,F1P969,F1PDH7,F1PGD7,F1PGY9,F1PHR6,F1PK74,F1PKF6,F1PPR0,F1PQZ7,F1PR95,F1PSI7,F1PTE0,F1PU02,F1PUX4,F1PV40,F1Q1T5,F1Q424,F6UN31,F6UQI5,F6XCI1,J9JHJ2,J9NRM1,J9NSD0,J9NTR8,J9NVU2,J9NZX6,J9P061,…
biological_process	actin filament-based process	A0M8V0,E2QUQ0,E2QUY2,E2QW54,E2QWD3,E2QWL1,E2QWN7,E2QWU0,E2QXA5,E2QXW5,E2QXY5,E2QXY7,E2QY07,E2QY08,E2QY31,E2QZ50,E2QZE7,E2QZV5,E2R0F2,E2R1C9,E2R1M6,E2R413,E2R498,E2R4N9,E2R5Q1,E2R7V4,E2R836,E2R912,E2R9S7,E2RB32,E2RD65,E2RD72,E2RDU7,E2RGD3,E2RGF3,E2RH53,E2RIQ2,E2RJT2,E2RJW9,E2RMT4,E2RNT5,E2RR96,E2RRC6,E2RSI6,E2RT60,F1P679,F1P6B7,F1P7F8,F1P7P3,F1P8N6,F1P912,F1P9B2,F1P9J3,F1P9W2,F1PA22,F1PAG6,F1PBG7,…
biological_process	establishment of localization in cell	A0A0A0MPC5,A4GT58,D3YJ60,E2QRX1,E2QS13,E2QTC7,E2QTL3,E2QTN0,E2QTP7,E2QUQ0,E2QUU5,E2QVP6,E2QW13,E2QW79,E2QWE3,E2QWM5,E2QWN7,E2QWX5,E2QXY7,E2QY31,E2QYB6,E2QYN4,E2QZ05,E2QZX1,E2R057,E2R0D2,E2R0K8,E2R0S6,E2R0T6,E2R1S5,E2R236,E2R2C3,E2R2G5,E2R2K4,E2R2P0,E2R3V7,E2R446,E2R498,E2R4A3,E2R4Q2,E2R507,E2R667,E2R792,E2R7F1,E2R7K6,E2R812,E2R832,E2R836,E2R8A2,E2R8C6,E2R8Y3,E2R9A2,E2R9K4,E2R9P2,E2RA27,E2RAE6,E2R…
biological_process	regulation of cellular protein metabolic process	A2SXS5,B6V8E6,D3YJ60,E2QRV2,E2QS13,E2QSE3,E2QT82,E2QUE7,E2QUR2,E2QUV7,E2QVF9,E2QW13,E2QWE3,E2QWM4,E2QWM5,E2QWM9,E2QXM7,E2QXN9,E2QYU2,E2QZB3,E2QZV2,E2QZV5,E2R030,E2R0G3,E2R0I8,E2R0X9,E2R1J6,E2R1S5,E2R2N2,E2R2P0,E2R3V7,E2R498,E2R4A3,E2R4A5,E2R4L7,E2R4R8,E2R5P4,E2R5Q5,E2R6L1,E2R755,E2R771,E2R792,E2R7J9,E2R7V4,E2R8A8,E2R8R8,E2R8W7,E2R912,E2R990,E2RAA0,E2RAG6,E2RAI8,E2RBD1,E2RBU1,E2RBV0,E2RCF2,E2RCH8,…
biological_process	actin filament organization	A0M8V0,E2QUQ0,E2QW54,E2QWL1,E2QWN7,E2QWU0,E2QXA5,E2QXY7,E2QY07,E2QY08,E2QZ50,E2QZE7,E2R1C9,E2R413,E2R7V4,E2R836,E2R912,E2R9S7,E2RD65,E2RD72,E2RGD3,E2RH53,E2RIQ2,E2RJW9,E2RMT4,E2RR96,E2RRC6,E2RSI6,F1P679,F1P7F8,F1P7P3,F1P8N6,F1P912,F1P9B2,F1PA22,F1PAG6,F1PBG7,F1PCT1,F1PDJ5,F1PE53,F1PFK0,F1PJ63,F1PQN5,F1PQS3,F1PR93,F1PRR4,F1PU58,F1PU60,F1PUT6,F1PUU5,F1PV45,F1PWW0,F1PXT8,F1PYQ1,F1PYU3,F1PZE5,F1Q1Q1,…
biological_process	establishment of protein localization	A4GT58,D3YJ60,E2QRX1,E2QS13,E2QTC7,E2QTL3,E2QTP7,E2QUU5,E2QVP6,E2QWE3,E2QWM5,E2QWN7,E2QWR3,E2QY31,E2QYB6,E2QYU2,E2QZX1,E2R057,E2R0D2,E2R0K8,E2R0L9,E2R236,E2R2C3,E2R2G5,E2R2P0,E2R3V7,E2R4Q2,E2R667,E2R792,E2R812,E2R832,E2R8A2,E2R8C6,E2R912,E2R9A2,E2R9K4,E2R9P2,E2RA27,E2RAE6,E2RAT6,E2RAT8,E2RAU5,E2RAZ6,E2RB34,E2RCZ7,E2RDX0,E2REK5,E2RF06,E2RFI6,E2RFW4,E2RG27,E2RH29,E2RIL1,E2RIQ2,E2RJE0,E2RJN7,E2RKR1,…
biological_process	proteasomal protein catabolic process	E2QRU7,E2QS13,E2QT82,E2QW34,E2QWM9,E2QX17,E2QXM7,E2QYU2,E2QZB3,E2QZV2,E2R0B6,E2R0I8,E2R1C3,E2R1V2,E2R3R2,E2R4A5,E2R4H4,E2R8L3,E2R9E3,E2RAG6,E2RBR6,E2RCP9,E2REF0,E2RF27,E2RF52,E2RFW4,E2RIY4,E2RJH3,E2RKJ1,E2RKR4,E2RLQ9,E2RLS3,E2RMN2,E2RN00,E2RNA6,E2RPC0,E2RPJ4,E2RPY9,E2RQA6,E2RR16,E2RRW0,E2RTD3,E2RTI3,F1P8N6,F1P9P5,F1PAT6,F1PD77,F1PF02,F1PIC7,F1PJ74,F1PLR0,F1PTL1,F1PU58,F1PUB5,F1PV82,F1PWN6,F1PX57,…
biological_process	cellular macromolecule metabolic process	A0A0A0MPC5,A0A0A0MPD2,A0A0A0MPD6,A0A0A0MPE1,A0A140T8E2,A2SXS5,A6Q0K4,B6V8E6,D0VWQ3,D3YJ60,E2QRQ8,E2QRR5,E2QRU7,E2QRV2,E2QS13,E2QS34,E2QSE3,E2QT82,E2QTC7,E2QTX0,E2QU31,E2QUE2,E2QUE7,E2QUJ4,E2QUK0,E2QUR2,E2QUR8,E2QUS9,E2QUU1,E2QUU5,E2QUV7,E2QUY7,E2QV07,E2QV97,E2QVF9,E2QVG1,E2QVG7,E2QVN6,E2QW13,E2QW27,E2QW34,E2QWE0,E2QWE3,E2QWF5,E2QWG8,E2QWM4,E2QWM5,E2QWM9,E2QWY6,E2QX17,E2QX33,E2QX86,E2QXC6,E2QXF2,E…
biological_process	protein transport	A4GT58,D3YJ60,E2QRX1,E2QS13,E2QTC7,E2QTL3,E2QTP7,E2QUU5,E2QVP6,E2QWE3,E2QWM5,E2QWN7,E2QY31,E2QYB6,E2QYU2,E2QZX1,E2R057,E2R0D2,E2R0K8,E2R0L9,E2R236,E2R2C3,E2R2G5,E2R2P0,E2R3V7,E2R4Q2,E2R667,E2R792,E2R812,E2R832,E2R8A2,E2R8C6,E2R912,E2R9A2,E2R9K4,E2R9P2,E2RA27,E2RAE6,E2RAT6,E2RAT8,E2RAU5,E2RAZ6,E2RB34,E2RDX0,E2REK5,E2RF06,E2RFI6,E2RFW4,E2RG27,E2RH29,E2RIQ2,E2RJE0,E2RJN7,E2RKR1,E2RLQ9,E2RN50,E2RNC3,…
biological_process	proteolysis	E2QRU7,E2QS13,E2QT82,E2QUY7,E2QW34,E2QWM9,E2QX17,E2QXF2,E2QXM7,E2QYU2,E2QZB3,E2QZV2,E2R0B6,E2R0I8,E2R129,E2R1C3,E2R1V2,E2R2V4,E2R3R2,E2R4A5,E2R4H4,E2R599,E2R5N5,E2R6Q7,E2R8A8,E2R8L3,E2R9E3,E2RAG6,E2RBR6,E2RC23,E2RCP9,E2RD70,E2RD94,E2RDP4,E2REF0,E2RF02,E2RF27,E2RF39,E2RF52,E2RFW4,E2RGN0,E2RIY4,E2RJ26,E2RJH3,E2RKJ1,E2RKR4,E2RKT9,E2RLQ9,E2RLS3,E2RMN2,E2RN00,E2RNA6,E2RNY3,E2RPC0,E2RPE3,E2RPJ4,E2RPS0,…
biological_process	G-protein coupled receptor signaling pathway	A0A140T8E2,E2QRX1,E2QUQ0,E2QZX7,E2R1C9,E2R8P9,E2RF98,E2RGF3,E2RGI5,E2RLF1,E2RMY4,E2RSI6,F1P6B7,F1PDJ5,F1PEH0,F1PGL8,F1PJ74,F1PKW7,F1PKY3,F1PL90,F1PTF8,F1PWW0,J9JHK2,J9NSF9,J9NVP2,J9NWW5,J9NYH7,J9NZ64
biological_process	RNA splicing	E2QXZ2,E2QZF6,E2R068,E2R0G3,E2R1C4,E2R3V2,E2R4X9,E2R6E4,E2R771,E2R7P6,E2R7Z2,E2R8D6,E2R8L3,E2R944,E2RB90,E2RBU1,E2RC33,E2RCD6,E2RDB2,E2RE92,E2REJ7,E2RIW7,E2RJL3,E2RKJ1,E2RL65,E2RLB7,E2RMW3,E2RNT3,E2RQ80,E2RQR0,E2RR33,E2RRM7,E2RRT4,E2RSS5,F1P7J0,F1PB28,F1PBJ4,F1PC59,F1PDH7,F1PEA6,F1PEZ0,F1PFC6,F1PKF6,F1PLD5,F1PR95,F1PSI7,F1PTE0,F1PV40,F1Q1B1,F1Q1K6,F1Q2U8,F1Q2Z4,F2Z4N6,F6UQI5,F6V5G7,F6V659,F6XAE9,…
biological_process	cellular protein catabolic process	E2QRU7,E2QS13,E2QT82,E2QUY7,E2QW34,E2QWM9,E2QX17,E2QXF2,E2QXM7,E2QYU2,E2QZB3,E2QZV2,E2R0B6,E2R0I8,E2R129,E2R1C3,E2R1V2,E2R3R2,E2R4A5,E2R4H4,E2R5N5,E2R6Q7,E2R8A8,E2R8L3,E2R9E3,E2RAG6,E2RBR6,E2RCP9,E2RD70,E2RD94,E2RDP4,E2REF0,E2RF02,E2RF27,E2RF39,E2RF52,E2RFW4,E2RIY4,E2RJ26,E2RJH3,E2RKJ1,E2RKR4,E2RKT9,E2RLQ9,E2RLS3,E2RMN2,E2RN00,E2RNA6,E2RNY3,E2RPC0,E2RPJ4,E2RPS0,E2RPY9,E2RQA6,E2RR16,E2RRW0,E2RTD3,…
biological_process	posttranscriptional regulation of gene expression	E2QRX1,E2QS13,E2QSE3,E2QUE7,E2QUR2,E2QYU2,E2R0L9,E2R0T6,E2R1A0,E2R1J6,E2R1S5,E2R412,E2R4L7,E2R5Q5,E2R771,E2R792,E2R7J9,E2R7P6,E2R8A8,E2R8R8,E2R990,E2R9M1,E2RA27,E2RAG6,E2RB79,E2RBD1,E2RBV8,E2RCN3,E2RDZ4,E2REK3,E2RH47,E2RHN1,E2RIQ8,E2RIX2,E2RJU3,E2RKJ1,E2RL17,E2RLL6,E2RM43,E2RNB6,E2RNJ3,E2RNT3,E2RPH1,E2RQV6,E2RTD3,F1P6C1,F1P969,F1P9I9,F1PA22,F1PBI6,F1PDJ5,F1PEQ5,F1PGB6,F1PGY1,F1PHT0,F1PK74,F1PLD5,…
biological_process	organelle organization	A0M8V0,A6Q0K4,B6V8E6,E2QRV2,E2QRX1,E2QS13,E2QSB9,E2QSF4,E2QTC7,E2QTL3,E2QUK0,E2QUQ0,E2QUU5,E2QV07,E2QW54,E2QWD3,E2QWE2,E2QWL1,E2QWN7,E2QWR3,E2QWU0,E2QX86,E2QXA5,E2QXR8,E2QXW5,E2QXY5,E2QXY7,E2QXZ2,E2QY07,E2QY08,E2QY30,E2QY31,E2QYC2,E2QYN4,E2QYQ7,E2QYZ9,E2QZ05,E2QZ50,E2QZ69,E2QZE7,E2QZV5,E2R0F2,E2R0I8,E2R0L9,E2R0S6,E2R1C9,E2R1M6,E2R1S5,E2R236,E2R2G5,E2R2N2,E2R2P0,E2R3V7,E2R413,E2R498,E2R4A3,E2R4A5,…
biological_process	regulation of cytoskeleton organization	A0M8V0,B6V8E6,E2QRV2,E2QUQ0,E2QV07,E2QW54,E2QWD3,E2QWL1,E2QWR3,E2QWU0,E2QXA5,E2QXY7,E2QY31,E2QZE7,E2R1C9,E2R1M6,E2R2P0,E2R413,E2R498,E2R7V4,E2R912,E2R9K4,E2RD65,E2RD72,E2RDE0,E2RFV2,E2RGD3,E2RGR3,E2RIQ2,E2RJT2,E2RJW9,E2RMT4,E2RNX1,E2RQW2,E2RR96,E2RRC6,E2RTB1,F1P679,F1P7P3,F1P9B2,F1PA22,F1PAG6,F1PBG7,F1PCT1,F1PDJ5,F1PE53,F1PED7,F1PFF6,F1PFG6,F1PFK0,F1PGY9,F1PJ63,F1PLU5,F1PMS4,F1PN67,F1PQS3,F1PR93,…
biological_process	cellular component disassembly	A0M8V0,E2QRV2,E2QSE3,E2QTN0,E2QUQ0,E2QW54,E2QWL1,E2QWN7,E2QX86,E2QY31,E2QZE7,E2R0I8,E2R1C9,E2R413,E2R8C0,E2RBM3,E2RD94,E2REF0,E2RGD3,E2RJW9,E2RLQ9,E2RNX1,E2RQE7,F1P7P3,F1P9B2,F1PFK0,F1PGG9,F1PHK9,F1PK74,F1PN67,F1PQN5,F1PQS3,F1PR93,F1PVW6,F1PXT8,F1PYU3,F1Q264,F6V322,F6V9Q0,F6X6W7,F6X725,F6XQD6,F6Y3P9,J9NS29,J9NSD0,J9NVP2,J9P1J5,J9P1R0,J9P2G7,Q863Z4
biological_process	proteolysis involved in cellular protein catabolic process	E2QRU7,E2QS13,E2QT82,E2QUY7,E2QW34,E2QWM9,E2QX17,E2QXF2,E2QXM7,E2QYU2,E2QZB3,E2QZV2,E2R0B6,E2R0I8,E2R129,E2R1C3,E2R1V2,E2R3R2,E2R4A5,E2R4H4,E2R5N5,E2R6Q7,E2R8A8,E2R8L3,E2R9E3,E2RAG6,E2RBR6,E2RCP9,E2RD70,E2RD94,E2RDP4,E2REF0,E2RF02,E2RF27,E2RF39,E2RF52,E2RFW4,E2RIY4,E2RJ26,E2RJH3,E2RKJ1,E2RKR4,E2RKT9,E2RLQ9,E2RLS3,E2RMN2,E2RN00,E2RNA6,E2RNY3,E2RPC0,E2RPJ4,E2RPS0,E2RPY9,E2RQA6,E2RR16,E2RRW0,E2RTD3,…
biological_process	regulation of cellular component size	A0M8V0,E2QSB9,E2QUQ0,E2QW54,E2QWL1,E2QWU0,E2QXA5,E2QXY7,E2QZE7,E2R0R3,E2R0X9,E2R1C9,E2R400,E2R413,E2R7F1,E2R7V4,E2RD65,E2RD72,E2RDF9,E2RGD3,E2RGF3,E2RIQ2,E2RJW9,E2RMT4,E2RPE3,E2RRC6,E2RSI6,F1P679,F1P6H7,F1P7P3,F1P9B2,F1P9U4,F1PA22,F1PAG6,F1PBG7,F1PCT1,F1PCV7,F1PFK0,F1PJ63,F1PQS3,F1PR93,F1PXT8,F1PYQ1,F1PZP6,F1Q3Y0,F6X6W7,F6XQD6,F6XY66,F6Y3P9,J9NV86,J9NWK4,J9P127,J9P1J5,J9P1R0,J9P2G7,J9P309,J9P9Z6,…
biological_process	antigen processing and presentation	E2QTP7,E2RN10,F1PBI6,F6UY11,H8ZYZ2,J9NUV0,J9NYJ8,L7N0C9
biological_process	ribonucleoprotein complex biogenesis	E2QUE7,E2QUU1,E2QWG8,E2QXZ2,E2QYZ9,E2QZF6,E2R1J6,E2R1S5,E2R4X9,E2R8A8,E2R8L3,E2R990,E2R9K4,E2R9V0,E2RBU1,E2RC33,E2RCI5,E2RCL4,E2REJ7,E2REK3,E2RFR0,E2RGG6,E2RGM1,E2RIM3,E2RIQ8,E2RIW7,E2RKS4,E2RL17,E2RMK6,E2RN45,E2RNT3,E2RPH1,E2RQ80,E2RQC9,E2RQP6,E2RR01,E2RR58,E2RRM7,E2RSR5,E2RSS5,E2RTB1,F1P694,F1P7B0,F1P969,F1PDH7,F1PF85,F1PGD7,F1PGY9,F1PHR6,F1PI20,F1PK74,F1PKF6,F1PKR6,F1PPR0,F1PQZ7,F1PR95,F1PSI7,…
biological_process	regulation of protein complex assembly	A0M8V0,B6V8E6,E2QRX1,E2QV07,E2QWL1,E2QWN7,E2QWU0,E2QXA5,E2QXY7,E2QYU2,E2QZE7,E2R0I8,E2R1C9,E2R413,E2R7F1,E2R7V4,E2RAT8,E2RD65,E2RD72,E2RFV2,E2RGD3,E2RGG9,E2RGR3,E2RH47,E2RH48,E2RIQ2,E2RJW9,E2RLQ9,E2RMT4,E2RNB6,E2RQE7,E2RTD3,F1P679,F1P7P3,F1PA22,F1PAG6,F1PBG7,F1PBK7,F1PFK0,F1PJ63,F1PJ74,F1PLR0,F1PPH7,F1PQS3,F1PXT8,F1PYQ1,F1PYU3,F1Q3J6,F1Q3Y0,F2Z4Q6,F6UV28,F6X6W7,F6XCS5,F6XY66,F6Y016,F6Y3P9,G1K268,…
biological_process	regulation of protein catabolic process	E2QS13,E2QT82,E2QUY7,E2QWM9,E2QXM7,E2QYU2,E2QZB3,E2QZV2,E2R0I8,E2R0J2,E2R4A5,E2R8A8,E2R8Y3,E2R9E3,E2R9K4,E2RAG6,E2RCP9,E2REF0,E2RF39,E2RFW4,E2RKJ1,E2RLQ9,E2RLS3,E2RPJ4,E2RPY9,E2RQA6,E2RR33,E2RTD3,F1P6C1,F1P9P5,F1PAT6,F1PBG7,F1PD77,F1PF03,F1PJ74,F1PLR0,F1PM34,F1PQS2,F1PTL1,F1PV82,F1PWW0,F1PX57,F1PX83,F1PZA0,F1Q330,F6UT62,F6UY11,F6Y2H4,F6Y4Y7,G1K268,J9NRV4,J9NS29,J9NVT9,J9P4C5,J9P4R4,P18067,Q6TEQ7,…
biological_process	oxidation-reduction process	A0A2Z5XAD4,A6Q0K4,E2QS13,E2QV08,E2QYZ4,E2R0I9,E2R507,E2R513,E2R5R9,E2RAE2,E2RCV4,E2REH5,E2RFC5,E2RGR9,E2RLQ6,E2RND5,E2RR27,E2RT65,F1P9E5,F1PAZ6,F1PB77,F1PDJ5,F1PE09,F1PLM5,F1PSM2,F1PUL4,F1PUM3,F1PV92,F1PX32,F1PYG8,F1PZA1,F1PZU9,F1Q0L3,F1Q1X9,F1Q466,F6V404,G1K296,H9GW87,J9NU72,J9NVY4,J9NZK5,J9P3C5,J9P556,J9P5S0,O02812,P00011
biological_process	actin polymerization or depolymerization	A0M8V0,E2QUQ0,E2QW54,E2QWL1,E2QWU0,E2QXA5,E2QXY7,E2QZ50,E2QZE7,E2R1C9,E2R413,E2R7V4,E2R836,E2RD65,E2RD72,E2RGD3,E2RH53,E2RIQ2,E2RJW9,E2RMT4,F1P679,F1P7P3,F1P9B2,F1PA22,F1PAG6,F1PBG7,F1PCT1,F1PFK0,F1PJ63,F1PQN5,F1PQS3,F1PR93,F1PRR4,F1PXT8,F1PZE5,F1Q3Y0,F6X6W7,F6Y3P9,J9NV86,J9NWK4,J9P127,J9P1J5,J9P1R0,J9P2G7,J9P309,J9P9Z6,Q863Z4
biological_process	organonitrogen compound metabolic process	A0A0A0MPD3,A0A0B4J194,A0A0B4J195,B4YY02,E2QRQ8,E2QRR5,E2QS94,E2QU31,E2QU97,E2QUI9,E2QUK0,E2QUR2,E2QV08,E2QV97,E2QVU9,E2QWC1,E2QWR3,E2QX69,E2QXI3,E2QXN9,E2QXS7,E2QY31,E2QYG6,E2QYN4,E2QYQ0,E2QYU2,E2QZ13,E2QZ69,E2R097,E2R0I8,E2R0I9,E2R0T6,E2R1E3,E2R1U9,E2R2N2,E2R2V4,E2R311,E2R3N2,E2R3Y5,E2R431,E2R4D5,E2R4L7,E2R4N9,E2R507,E2R513,E2R599,E2R5B9,E2R651,E2R7C2,E2R7E8,E2R857,E2R8E3,E2R9R1,E2RA59,E2RAA0,E2…
biological_process	metabolic process	A0A0A0MPC5,A0A0A0MPD0,A0A0A0MPD2,A0A0A0MPD3,A0A0A0MPD6,A0A0A0MPE1,A0A0B4J194,A0A0B4J195,A0A140T8E2,A0A2Z5XAD4,A1DZY5,A2SXS5,A6Q0K4,B4YY02,B6V8E6,D0VWQ3,D3YJ60,E2QRQ8,E2QRR5,E2QRU7,E2QRV2,E2QRX1,E2QS13,E2QS34,E2QS94,E2QSE3,E2QT82,E2QTC7,E2QTL3,E2QTX0,E2QU31,E2QU97,E2QUE2,E2QUE7,E2QUI9,E2QUJ4,E2QUK0,E2QUR2,E2QUR8,E2QUS9,E2QUU1,E2QUU5,E2QUV3,E2QUV7,E2QUY7,E2QV07,E2QV08,E2QV12,E2QV97,E2QVA7,E2QVF9,E2…
biological_process	vesicle-mediated transport	A0A0A0MPC5,A0A140T8E2,A4GT58,B6V8E6,E2QRX1,E2QSE3,E2QTP7,E2QUQ0,E2QUR8,E2QUV3,E2QWX5,E2QYI2,E2QYU2,E2QZN8,E2R030,E2R0T6,E2R2K4,E2R446,E2R4Q2,E2R651,E2R667,E2R7F1,E2R7K6,E2R812,E2R836,E2R8A2,E2R8C6,E2R8Y3,E2R9A2,E2RAE6,E2RAT6,E2RAT8,E2RB31,E2REI0,E2REI7,E2REP2,E2RFW4,E2RH29,E2RHA6,E2RJN7,E2RJZ5,E2RLQ9,E2RN10,E2RNC3,E2RNW6,E2RPG3,E2RPG9,E2RPI9,E2RQE7,E2RR96,E2RRB7,E2RRC6,E2RRD2,E2RRJ6,E2RSG8,E2RSI6…
biological_process	negative regulation of cellular process	A0A140T8E2,A0M8U6,A0M8V0,A2SXS5,A4GT58,A6Q0K4,B4YY02,B6V8E6,E2QRQ8,E2QRV2,E2QRX1,E2QS13,E2QSB9,E2QT82,E2QTC7,E2QUE7,E2QUQ0,E2QUR2,E2QUV7,E2QV07,E2QVF9,E2QVG1,E2QW13,E2QW54,E2QWD3,E2QWE0,E2QWE3,E2QWL1,E2QWM9,E2QWR3,E2QX33,E2QX86,E2QXA5,E2QXA6,E2QXC6,E2QXF2,E2QXM7,E2QY08,E2QY30,E2QY31,E2QYK6,E2QYN4,E2QYU2,E2QYZ4,E2QZE7,E2QZN8,E2QZV2,E2QZV5,E2R030,E2R0D2,E2R0G3,E2R0I8,E2R0R3,E2R0T6,E2R0X9,E2R1C9,E2R…
biological_process	macromolecular complex disassembly	A0M8V0,E2QRV2,E2QTN0,E2QUQ0,E2QW54,E2QWL1,E2QX86,E2QZE7,E2R0I8,E2R1C9,E2R413,E2RBM3,E2REF0,E2RGD3,E2RJW9,E2RLQ9,E2RNX1,E2RQE7,F1P7P3,F1P9B2,F1PFK0,F1PGG9,F1PK74,F1PN67,F1PQN5,F1PQS3,F1PR93,F1PVW6,F1PXT8,F1Q264,F6X6W7,F6X725,F6XQD6,F6Y3P9,J9NSD0,J9NVP2,J9P1J5,J9P1R0,J9P2G7,Q863Z4
biological_process	generation of precursor metabolites and energy	A0A0A0MPD0,A0A2Z5XAD4,A6Q0K4,E2QV08,E2QX53,E2R1S5,E2R2C3,E2R412,E2R4L7,E2R5R9,E2RAN6,E2RAS8,E2RFC5,E2RGR9,E2RR27,E2RRC9,E2RT65,F1PB77,F1PBT3,F1PHR2,F1PS82,F1PSM2,F1PTZ9,F1PUL4,F1PV92,F1PX32,F1PYG8,F1PZA1,F1PZU9,F1Q0L3,F1Q1X9,F6XY66,G1K296,J9NU72,J9P324,J9P3C5,J9P556,J9PBL1,P00011
biological_process	regulation of actin filament length	A0M8V0,E2QUQ0,E2QW54,E2QWL1,E2QWU0,E2QXA5,E2QXY7,E2QZE7,E2R1C9,E2R413,E2R7V4,E2RD65,E2RD72,E2RGD3,E2RIQ2,E2RJW9,E2RMT4,F1P679,F1P7P3,F1P9B2,F1PA22,F1PAG6,F1PBG7,F1PCT1,F1PFK0,F1PJ63,F1PQS3,F1PR93,F1PXT8,F1Q3Y0,F6X6W7,F6Y3P9,J9NV86,J9NWK4,J9P127,J9P1J5,J9P1R0,J9P2G7,J9P309,J9P9Z6,Q863Z4
biological_process	regulation of actin polymerization or depolymerization	A0M8V0,E2QUQ0,E2QW54,E2QWL1,E2QWU0,E2QXA5,E2QXY7,E2QZE7,E2R1C9,E2R413,E2R7V4,E2RD65,E2RD72,E2RGD3,E2RIQ2,E2RJW9,E2RMT4,F1P679,F1P7P3,F1P9B2,F1PA22,F1PAG6,F1PBG7,F1PCT1,F1PFK0,F1PJ63,F1PQS3,F1PR93,F1PXT8,F1Q3Y0,F6X6W7,F6Y3P9,J9NV86,J9NWK4,J9P127,J9P1J5,J9P1R0,J9P2G7,J9P309,J9P9Z6,Q863Z4
biological_process	protein complex disassembly	A0M8V0,E2QRV2,E2QUQ0,E2QW54,E2QWL1,E2QZE7,E2R0I8,E2R1C9,E2R413,E2RBM3,E2RGD3,E2RJW9,E2RLQ9,E2RNX1,E2RQE7,F1P7P3,F1P9B2,F1PFK0,F1PGG9,F1PK74,F1PN67,F1PQN5,F1PQS3,F1PR93,F1PVW6,F1PXT8,F1Q264,F6X6W7,F6X725,F6XQD6,F6Y3P9,J9NVP2,J9P1J5,J9P1R0,J9P2G7,Q863Z4
biological_process	mRNA processing	E2QUJ4,E2QXZ2,E2QYH6,E2QYJ4,E2QZF6,E2R068,E2R0G3,E2R1C4,E2R3V2,E2R479,E2R4A3,E2R4R3,E2R4X9,E2R6E4,E2R771,E2R7P6,E2R7S6,E2R7Z2,E2R8L3,E2R944,E2R990,E2RBU1,E2RC33,E2RDB2,E2REJ7,E2RIW7,E2RJL3,E2RL65,E2RMW3,E2RNT3,E2RPH1,E2RQ80,E2RQR0,E2RQV6,E2RR33,E2RRM7,E2RRT4,E2RSS5,F1P7J0,F1PAT6,F1PC59,F1PDH7,F1PDS0,F1PEA6,F1PEZ0,F1PFC6,F1PKF6,F1PLD5,F1PQZ7,F1PR95,F1PSI7,F1PTE0,F1PV40,F1Q1B1,F1Q1K6,F1Q2U8,F1Q2Z4,…
biological_process	cellular macromolecule localization	B6V8E6,E2QRX1,E2QS13,E2QSE3,E2QTL3,E2QTP7,E2QUQ0,E2QUU5,E2QVP6,E2QWE3,E2QWM4,E2QWM5,E2QWN7,E2QWR3,E2QYB6,E2QZ05,E2QZX1,E2R057,E2R0K8,E2R236,E2R2G5,E2R2P0,E2R3V7,E2R4Q2,E2R580,E2R667,E2R792,E2R7V4,E2R832,E2R8A2,E2R8C6,E2R8L3,E2R9A2,E2R9K4,E2R9M1,E2R9S7,E2RA27,E2RAE6,E2RAT8,E2RAU5,E2RAZ6,E2RB34,E2RCZ7,E2RD72,E2RDE0,E2REK5,E2RF06,E2RFI6,E2RFW4,E2RGF3,E2RH29,E2RHY8,E2RIL1,E2RIQ2,E2RLQ9,E2RN50,E2RND5,…
biological_process	regulation of anatomical structure size	A0A140T8E2,A0M8V0,E2QSB9,E2QUQ0,E2QW54,E2QWL1,E2QWU0,E2QXA5,E2QXN9,E2QXY7,E2QZE7,E2R0R3,E2R0X9,E2R1C9,E2R400,E2R413,E2R7F1,E2R7V4,E2RD65,E2RD72,E2RDF9,E2RGD3,E2RGF3,E2RIQ2,E2RJE0,E2RJW9,E2RMT4,E2RPE3,E2RPJ4,E2RRC6,E2RSI6,E2RTL4,F1P679,F1P6H7,F1P7D3,F1P7P3,F1P9B2,F1P9U4,F1PA22,F1PAG6,F1PBG7,F1PCT1,F1PCV7,F1PEH0,F1PFK0,F1PJ63,F1PJ74,F1PQS3,F1PR93,F1PXT8,F1PYQ1,F1PZP6,F1Q3Y0,F1Q462,F2Z4N0,F6X6W7,F6X…
biological_process	regulation of actin filament depolymerization	A0M8V0,E2QUQ0,E2QW54,E2QWL1,E2QZE7,E2R1C9,E2R413,E2RGD3,E2RJW9,F1P7P3,F1P9B2,F1PFK0,F1PQS3,F1PR93,F1PXT8,F6X6W7,F6Y3P9,J9P1J5,J9P1R0,J9P2G7,Q863Z4
biological_process	RNA splicing, via transesterification reactions	E2QXZ2,E2QZF6,E2R068,E2R0G3,E2R1C4,E2R3V2,E2R4X9,E2R6E4,E2R771,E2R7P6,E2R7Z2,E2R8L3,E2R944,E2RBU1,E2RC33,E2RDB2,E2REJ7,E2RIW7,E2RJL3,E2RL65,E2RMW3,E2RNT3,E2RQ80,E2RQR0,E2RR33,E2RRM7,E2RRT4,E2RSS5,F1P7J0,F1PC59,F1PDH7,F1PEA6,F1PEZ0,F1PFC6,F1PKF6,F1PLD5,F1PR95,F1PSI7,F1PTE0,F1PV40,F1Q1B1,F1Q1K6,F1Q2U8,F1Q2Z4,F2Z4N6,F6UQI5,F6V5G7,F6XAE9,J9NSX4,J9P061,J9P098,J9P2I8,J9P7U8,K9J6N9,Q5WR10
biological_process	RNA splicing, via transesterification reactions with bulged adenosine as nucleophile	E2QXZ2,E2QZF6,E2R068,E2R0G3,E2R1C4,E2R3V2,E2R4X9,E2R6E4,E2R771,E2R7P6,E2R7Z2,E2R8L3,E2R944,E2RBU1,E2RC33,E2RDB2,E2REJ7,E2RIW7,E2RJL3,E2RL65,E2RMW3,E2RNT3,E2RQ80,E2RQR0,E2RR33,E2RRM7,E2RRT4,E2RSS5,F1P7J0,F1PC59,F1PDH7,F1PEA6,F1PEZ0,F1PFC6,F1PKF6,F1PLD5,F1PR95,F1PSI7,F1PTE0,F1PV40,F1Q1B1,F1Q1K6,F1Q2U8,F1Q2Z4,F2Z4N6,F6UQI5,F6V5G7,F6XAE9,J9NSX4,J9P061,J9P098,J9P2I8,J9P7U8,K9J6N9,Q5WR10
biological_process	mRNA splicing, via spliceosome	E2QXZ2,E2QZF6,E2R068,E2R0G3,E2R1C4,E2R3V2,E2R4X9,E2R6E4,E2R771,E2R7P6,E2R7Z2,E2R8L3,E2R944,E2RBU1,E2RC33,E2RDB2,E2REJ7,E2RIW7,E2RJL3,E2RL65,E2RMW3,E2RNT3,E2RQ80,E2RQR0,E2RR33,E2RRM7,E2RRT4,E2RSS5,F1P7J0,F1PC59,F1PDH7,F1PEA6,F1PEZ0,F1PFC6,F1PKF6,F1PLD5,F1PR95,F1PSI7,F1PTE0,F1PV40,F1Q1B1,F1Q1K6,F1Q2U8,F1Q2Z4,F2Z4N6,F6UQI5,F6V5G7,F6XAE9,J9NSX4,J9P061,J9P098,J9P2I8,J9P7U8,K9J6N9,Q5WR10
biological_process	cellular protein localization	B6V8E6,E2QRX1,E2QS13,E2QSE3,E2QTL3,E2QTP7,E2QUQ0,E2QUU5,E2QVP6,E2QWE3,E2QWM4,E2QWM5,E2QWN7,E2QWR3,E2QYB6,E2QZ05,E2QZX1,E2R057,E2R0K8,E2R236,E2R2G5,E2R2P0,E2R3V7,E2R4Q2,E2R580,E2R667,E2R792,E2R7V4,E2R832,E2R8A2,E2R8C6,E2R8L3,E2R9A2,E2R9K4,E2R9M1,E2R9S7,E2RA27,E2RAE6,E2RAT8,E2RAU5,E2RAZ6,E2RB34,E2RCZ7,E2RD72,E2RDE0,E2REK5,E2RF06,E2RFI6,E2RFW4,E2RGF3,E2RH29,E2RHY8,E2RIL1,E2RIQ2,E2RLQ9,E2RN50,E2RND5,…
biological_process	cellular protein complex disassembly	A0M8V0,E2QRV2,E2QUQ0,E2QW54,E2QWL1,E2QZE7,E2R1C9,E2R413,E2RBM3,E2RGD3,E2RJW9,E2RNX1,E2RQE7,F1P7P3,F1P9B2,F1PFK0,F1PGG9,F1PK74,F1PN67,F1PQN5,F1PQS3,F1PR93,F1PVW6,F1PXT8,F1Q264,F6X6W7,F6X725,F6XQD6,F6Y3P9,J9NVP2,J9P1J5,J9P1R0,J9P2G7,Q863Z4
biological_process	cellular response to chemical stimulus	A0A0B4J195,A2SXS5,A6Q0K4,B6V8E6,D3YJ60,E2QS13,E2QSB9,E2QSE3,E2QTN0,E2QUG4,E2QUH1,E2QUK0,E2QUR2,E2QUV7,E2QVG1,E2QWD3,E2QWE3,E2QWY6,E2QXF2,E2QXY7,E2QY30,E2QY31,E2QYG6,E2R0F2,E2R0I8,E2R0J2,E2R0T6,E2R0X9,E2R2G5,E2R2K4,E2R2N2,E2R3V7,E2R412,E2R5B9,E2R6Q7,E2R755,E2R7F1,E2R7V4,E2R912,E2R9N5,E2R9S7,E2RA06,E2RA27,E2RAI8,E2RAN6,E2RAU5,E2RB31,E2RBU1,E2RBW8,E2RC33,E2RCF2,E2RCN3,E2RDF9,E2RE67,E2REF0,E2REH5,E2R…
biological_process	regulation of actin cytoskeleton organization	A0M8V0,E2QUQ0,E2QW54,E2QWD3,E2QWL1,E2QWU0,E2QXA5,E2QXY7,E2QZE7,E2R1C9,E2R1M6,E2R413,E2R498,E2R7V4,E2R912,E2RD65,E2RD72,E2RGD3,E2RIQ2,E2RJT2,E2RJW9,E2RMT4,E2RR96,E2RRC6,F1P679,F1P7P3,F1P9B2,F1PA22,F1PAG6,F1PBG7,F1PCT1,F1PDJ5,F1PE53,F1PFK0,F1PJ63,F1PQS3,F1PR93,F1PU60,F1PUT6,F1PUU5,F1PXT8,F1PYQ1,F1PYU3,F1Q3Y0,F6X6W7,F6XY66,F6Y3P9,J9NTX8,J9NV86,J9NVP2,J9NWK4,J9P127,J9P1J5,J9P1R0,J9P2G7,J9P309,J9P9Z6,…
biological_process	extracellular matrix organization	E2QSE3,E2QU10,E2QUG4,E2QWN7,E2QYZ4,E2QZN8,E2R030,E2R416,E2R4J1,E2RAA0,E2RCF2,E2RCV4,E2RD94,E2RGR7,E2RHY7,E2RJE0,E2RLB8,E2RNL3,E2RNW5,E2RPH7,E2RT60,E2RTL4,F1PG08,F1PGZ1,F1PHK9,F1PHX8,F1PHY1,F1PKH2,F1PKX2,F1PLV6,F1PMK7,F1PRU3,F1PST8,F1PUM6,F1PXK3,F1PYU3,F1PZL5,F1Q057,F1Q129,F1Q133,F1Q3I5,F6XWS5,J9NS29,J9NYC0,J9NZK5,J9P2F4,J9P889,Q32KH1,Q6TEQ7,Q9TSZ6,Q9XSJ7
biological_process	proteasomal ubiquitin-dependent protein catabolic process	E2QRU7,E2QS13,E2QW34,E2QWM9,E2QX17,E2QXM7,E2QYU2,E2QZB3,E2QZV2,E2R0B6,E2R0I8,E2R1C3,E2R1V2,E2R3R2,E2R4A5,E2R4H4,E2R9E3,E2RAG6,E2RBR6,E2RCP9,E2REF0,E2RF27,E2RF52,E2RFW4,E2RIY4,E2RJH3,E2RKJ1,E2RKR4,E2RLQ9,E2RMN2,E2RN00,E2RNA6,E2RPC0,E2RPJ4,E2RQA6,E2RR16,E2RRW0,E2RTD3,E2RTI3,F1P8N6,F1P9P5,F1PF02,F1PIC7,F1PLR0,F1PTL1,F1PU58,F1PUB5,F1PV82,F1PWN6,F1PX57,F1PX83,F1Q330,F6V735,F6X958,F6XMP7,G1K268,J9JHD9,…
biological_process	extracellular structure organization	E2QSE3,E2QU10,E2QUG4,E2QWN7,E2QYZ4,E2QZN8,E2R030,E2R416,E2R4J1,E2RAA0,E2RCF2,E2RCV4,E2RD94,E2RGR7,E2RHY7,E2RJE0,E2RLB8,E2RNL3,E2RNW5,E2RPH7,E2RT60,E2RTL4,F1PG08,F1PGZ1,F1PHK9,F1PHX8,F1PHY1,F1PKH2,F1PKX2,F1PLV6,F1PMK7,F1PRU3,F1PST8,F1PUM6,F1PXK3,F1PYU3,F1PZL5,F1Q057,F1Q129,F1Q133,F1Q3I5,F6XWS5,J9NS29,J9NYC0,J9NZK5,J9P2F4,J9P889,Q32KH1,Q6TEQ7,Q9TSZ6,Q9XSJ7
biological_process	actin filament depolymerization	A0M8V0,E2QUQ0,E2QW54,E2QWL1,E2QZE7,E2R1C9,E2R413,E2RGD3,E2RJW9,F1P7P3,F1P9B2,F1PFK0,F1PQN5,F1PQS3,F1PR93,F1PXT8,F6X6W7,F6Y3P9,J9P1J5,J9P1R0,J9P2G7,Q863Z4
biological_process	translational initiation	E2QUU1,E2QWG8,E2R1J6,E2REK3,E2RGG6,E2RJU3,E2RKS4,E2RL17,E2RMK6,E2RPH1,E2RQP6,E2RSR5,F1P969,F1PHR6,F1PHT0,F1PLD5,F1PNF3,F1PPR0,F1PQZ7,F1PU02,F6UN31,F6UV28,F6X725,J9NSD0,J9NTR8,J9PA62
biological_process	regulation of cellular component biogenesis	A0M8V0,B6V8E6,E2QRX1,E2QSE3,E2QUI7,E2QV07,E2QWL1,E2QWN7,E2QWR3,E2QWU0,E2QXA5,E2QXY7,E2QYU2,E2QZE7,E2R030,E2R0I8,E2R1C9,E2R1X9,E2R2K4,E2R413,E2R498,E2R7F1,E2R7V4,E2R912,E2R990,E2RAA0,E2RAG6,E2RAT8,E2RCF2,E2RD65,E2RD72,E2RFV2,E2RGD3,E2RGG9,E2RGM1,E2RGR3,E2RH47,E2RH48,E2RIQ2,E2RJW9,E2RLQ9,E2RMT4,E2RNB6,E2RQE7,E2RR96,E2RRC6,E2RSI6,E2RTD3,E2RTI3,F1P679,F1P7P3,F1P9B2,F1PA22,F1PAG6,F1PAT6,F1PBG7,F1PBK7,…
biological_process	regulation of protein complex disassembly	A0M8V0,E2QRV2,E2QUQ0,E2QW54,E2QWL1,E2QZE7,E2R0I8,E2R1C9,E2R413,E2RGD3,E2RJW9,E2RNX1,F1P7P3,F1P9B2,F1PFK0,F1PK74,F1PN67,F1PQS3,F1PR93,F1PXT8,F1Q264,F6X6W7,F6XQD6,F6Y3P9,J9P1J5,J9P1R0,J9P2G7,Q863Z4
biological_process	tRNA aminoacylation for protein translation	E2QRQ8,E2QRR5,E2QU31,E2QUR2,E2QV97,E2QXI3,E2QZ69,E2R4D5,E2RA59,E2RGG9,E2RHR7,E2RHW7,E2RNQ8,E2RSP4,E2RTJ7,F1P7C2,F1PLJ9,F1PU34,F1PZP6,F1Q332,F6XQ20
biological_process	mRNA metabolic process	E2QUJ4,E2QXZ2,E2QYH6,E2QYJ4,E2QZF6,E2R068,E2R0G3,E2R1C4,E2R1J6,E2R3V2,E2R412,E2R479,E2R4A3,E2R4R3,E2R4X9,E2R6E4,E2R771,E2R7P6,E2R7S6,E2R7Z2,E2R8L3,E2R944,E2R990,E2RBU1,E2RC33,E2RDB2,E2RDZ4,E2REJ7,E2RH09,E2RIM3,E2RIW7,E2RJL3,E2RL65,E2RMW3,E2RNT3,E2RPH1,E2RQ80,E2RQR0,E2RQV6,E2RR33,E2RRM7,E2RRT4,E2RSS5,F1P7J0,F1PAT6,F1PC59,F1PDH7,F1PDS0,F1PEA6,F1PEZ0,F1PFC6,F1PI20,F1PKF6,F1PLD5,F1PQZ7,F1PR95,F1PSI7,…
biological_process	negative regulation of protein metabolic process	A2SXS5,B6V8E6,E2QS13,E2QT82,E2QUR2,E2QWM9,E2QZV2,E2QZV5,E2R030,E2R0G3,E2R0I8,E2R0X9,E2R2P0,E2R4A3,E2R5Q5,E2R8A8,E2R912,E2R990,E2RAG6,E2RBU1,E2RCF2,E2RCH8,E2RCZ7,E2RDZ4,E2REF0,E2RF39,E2RF98,E2RGG9,E2RKJ1,E2RL17,E2RLS3,E2RM91,E2RPJ4,E2RQW2,E2RR33,E2RRD1,E2RSU6,F1P6C1,F1P914,F1PBI6,F1PEQ5,F1PEQ7,F1PF03,F1PGB6,F1PHT0,F1PIA2,F1PJ74,F1PKU3,F1PKW7,F1PLR0,F1PM26,F1PNF3,F1PQ10,F1PQL2,F1PQS2,F1PQZ7,F1PRR3,…
biological_process	mitochondrial ATP synthesis coupled electron transport	E2RR27,F1Q1X9,J9P3C5,J9P556,P00011
biological_process	positive regulation of cellular process	A0A0A0MPD6,A0A140T8E0,A0A140T8E2,A2SXS5,A6Q0K4,B6V8E6,D3YJ60,E2QRV2,E2QRX1,E2QS13,E2QS34,E2QSE3,E2QTC7,E2QTL3,E2QTN0,E2QTX0,E2QUE7,E2QUI7,E2QUK0,E2QUQ0,E2QUR8,E2QUU5,E2QUV3,E2QUV7,E2QVF9,E2QW13,E2QW90,E2QWD3,E2QWE0,E2QWL1,E2QWM5,E2QWN7,E2QWR3,E2QWU0,E2QXF0,E2QXF2,E2QXM7,E2QXY7,E2QY30,E2QY31,E2QYH6,E2QYN4,E2QYU2,E2QYZ4,E2QZB3,E2QZN8,E2QZV2,E2R030,E2R068,E2R0D6,E2R0G3,E2R0I8,E2R0L9,E2R0R3,E2R129,E2…
biological_process	regulation of organelle organization	A0M8V0,A6Q0K4,B6V8E6,E2QRV2,E2QRX1,E2QTL3,E2QUQ0,E2QV07,E2QW54,E2QWD3,E2QWL1,E2QWN7,E2QWR3,E2QWU0,E2QXA5,E2QXY7,E2QY31,E2QYN4,E2QZE7,E2R0L9,E2R1C9,E2R1M6,E2R2N2,E2R2P0,E2R3V7,E2R413,E2R498,E2R4A3,E2R4L7,E2R7F1,E2R7V4,E2R912,E2R990,E2R9K4,E2RAT8,E2RB79,E2RBV0,E2RC33,E2RCZ7,E2RD65,E2RD72,E2RDE0,E2RFV2,E2RGD3,E2RGR3,E2RH71,E2RIQ2,E2RJT2,E2RJW9,E2RLL6,E2RMT4,E2RNX1,E2RQW2,E2RR96,E2RRC6,E2RSI6,E2RTB1,…
biological_process	regulation of protein depolymerization	A0M8V0,E2QRV2,E2QUQ0,E2QW54,E2QWL1,E2QZE7,E2R1C9,E2R413,E2RGD3,E2RJW9,E2RNX1,F1P7P3,F1P9B2,F1PFK0,F1PN67,F1PQS3,F1PR93,F1PXT8,F6X6W7,F6XQD6,F6Y3P9,J9P1J5,J9P1R0,J9P2G7,Q863Z4
biological_process	intracellular protein transport	E2QRX1,E2QS13,E2QTL3,E2QTP7,E2QUU5,E2QVP6,E2QWE3,E2QWM5,E2QWN7,E2QYB6,E2QZX1,E2R057,E2R0K8,E2R236,E2R2G5,E2R2P0,E2R3V7,E2R4Q2,E2R667,E2R792,E2R832,E2R8A2,E2R8C6,E2R9A2,E2R9K4,E2RA27,E2RAE6,E2RAT8,E2RAU5,E2RAZ6,E2RB34,E2REK5,E2RF06,E2RFI6,E2RFW4,E2RH29,E2RIQ2,E2RLQ9,E2RN50,E2RND5,E2RPG3,E2RPG9,E2RPI9,E2RQE7,E2RRJ6,E2RSG8,E2RSJ0,E2RSX0,E2RT32,E2RT63,F1P732,F1P8N6,F1PAT6,F1PAY5,F1PB28,F1PBG7,F1PDM3,…
biological_process	regulation of actin filament-based process	A0M8V0,E2QUQ0,E2QUY2,E2QW54,E2QWD3,E2QWL1,E2QWU0,E2QXA5,E2QXY7,E2QZE7,E2R1C9,E2R1M6,E2R413,E2R498,E2R7V4,E2R912,E2RD65,E2RD72,E2RGD3,E2RIQ2,E2RJT2,E2RJW9,E2RMT4,E2RR96,E2RRC6,F1P679,F1P7P3,F1P9B2,F1PA22,F1PAG6,F1PBG7,F1PCT1,F1PDJ5,F1PE53,F1PFK0,F1PJ63,F1PQS3,F1PR93,F1PU60,F1PUT6,F1PUU5,F1PXT8,F1PYQ1,F1PYU3,F1Q3Y0,F6X6W7,F6XY66,F6Y3P9,J9NTX8,J9NV86,J9NVP2,J9NWK4,J9P127,J9P1J5,J9P1R0,J9P2G7,J9P309,…
biological_process	RNA processing	E2QUE2,E2QUE7,E2QUJ4,E2QW27,E2QXZ2,E2QYH6,E2QYJ4,E2QYZ9,E2QZF6,E2R068,E2R0G3,E2R1C4,E2R3V2,E2R479,E2R4A3,E2R4R3,E2R4X9,E2R6E4,E2R771,E2R7P6,E2R7S6,E2R7Z2,E2R8A8,E2R8D6,E2R8L3,E2R944,E2R990,E2R9V0,E2RA50,E2RB90,E2RBF4,E2RBU1,E2RC33,E2RCD6,E2RCI5,E2RCL4,E2RDB2,E2RE92,E2REJ7,E2RFR0,E2RGM1,E2RH09,E2RIM3,E2RIW7,E2RJ54,E2RJL3,E2RKJ1,E2RL65,E2RLB7,E2RMW3,E2RNT3,E2RPH1,E2RQ74,E2RQ80,E2RQR0,E2RQV6,E2RR33,…
biological_process	tRNA aminoacylation	E2QRQ8,E2QRR5,E2QU31,E2QUR2,E2QV97,E2QXI3,E2QZ69,E2R4D5,E2RA59,E2RGG9,E2RHR7,E2RHW7,E2RNQ8,E2RSP4,E2RTJ7,F1P7C2,F1PLJ9,F1PU34,F1PZP6,F1Q332,F6XQ20
biological_process	protein depolymerization	A0M8V0,E2QRV2,E2QUQ0,E2QW54,E2QWL1,E2QZE7,E2R1C9,E2R413,E2RGD3,E2RJW9,E2RNX1,F1P7P3,F1P9B2,F1PFK0,F1PGG9,F1PN67,F1PQN5,F1PQS3,F1PR93,F1PVW6,F1PXT8,F6X6W7,F6XQD6,F6Y3P9,J9NVP2,J9P1J5,J9P1R0,J9P2G7,Q863Z4
biological_process	amino acid activation	E2QRQ8,E2QRR5,E2QU31,E2QUR2,E2QV97,E2QXI3,E2QZ69,E2R4D5,E2RA59,E2RGG9,E2RHR7,E2RHW7,E2RNQ8,E2RSP4,E2RTJ7,F1P7C2,F1PLJ9,F1PU34,F1PZP6,F1Q332,F6XQ20
biological_process	regulation of proteasomal protein catabolic process	E2QS13,E2QT82,E2QWM9,E2QYU2,E2QZB3,E2QZV2,E2R0I8,E2R4A5,E2RAG6,E2REF0,E2RFW4,E2RKJ1,E2RLQ9,E2RLS3,E2RPJ4,E2RPY9,E2RQA6,E2RTD3,F1P9P5,F1PAT6,F1PD77,F1PJ74,F1PLR0,F1PTL1,F1PX83,F1PZA0,F1Q330,F6UY11,F6Y4Y7,G1K268,J9NRV4,J9NVT9,J9P4C5
biological_process	cellular amino acid metabolic process	A0A0B4J194,A0A0B4J195,E2QRQ8,E2QRR5,E2QU31,E2QU97,E2QUR2,E2QV97,E2QXI3,E2QXN9,E2QXS7,E2QZ69,E2R3N2,E2R431,E2R4D5,E2R4L7,E2R599,E2R5B9,E2R7C2,E2R857,E2RA59,E2RDN1,E2RF46,E2RFD0,E2RFL0,E2RGG9,E2RHR7,E2RHW7,E2RKY4,E2RLB8,E2RLU9,E2RNL3,E2RNQ8,E2RNW5,E2RPJ4,E2RPN5,E2RS63,E2RSP4,E2RTJ7,E2RTL4,F1P7C2,F1P7D3,F1PBI2,F1PFD8,F1PHI4,F1PHM4,F1PL97,F1PLJ9,F1PU34,F1PW12,F1PY20,F1PY28,F1PZA1,F1PZL5,F1PZP6,F1Q332…
biological_process	cellular metabolic process	A0A0A0MPC5,A0A0A0MPD0,A0A0A0MPD2,A0A0A0MPD3,A0A0A0MPD6,A0A0A0MPE1,A0A0B4J194,A0A0B4J195,A0A140T8E2,A0A2Z5XAD4,A2SXS5,A6Q0K4,B4YY02,B6V8E6,D0VWQ3,D3YJ60,E2QRQ8,E2QRR5,E2QRU7,E2QRV2,E2QS13,E2QS34,E2QSE3,E2QT82,E2QTC7,E2QTL3,E2QTX0,E2QU31,E2QU97,E2QUE2,E2QUE7,E2QUI9,E2QUJ4,E2QUK0,E2QUR2,E2QUR8,E2QUS9,E2QUU1,E2QUU5,E2QUV7,E2QUY7,E2QV07,E2QV08,E2QV97,E2QVA7,E2QVF9,E2QVG1,E2QVG7,E2QVN6,E2QVU9,E2QW13,E2…
biological_process	modification-dependent protein catabolic process	E2QRU7,E2QS13,E2QT82,E2QUY7,E2QW34,E2QWM9,E2QX17,E2QXM7,E2QYU2,E2QZB3,E2QZV2,E2R0B6,E2R0I8,E2R129,E2R1C3,E2R1V2,E2R3R2,E2R4A5,E2R4H4,E2R5N5,E2R8A8,E2R9E3,E2RAG6,E2RBR6,E2RCP9,E2RD70,E2RDP4,E2REF0,E2RF02,E2RF27,E2RF39,E2RF52,E2RFW4,E2RIY4,E2RJ26,E2RJH3,E2RKJ1,E2RKR4,E2RKT9,E2RLQ9,E2RMN2,E2RN00,E2RNA6,E2RNY3,E2RPC0,E2RPJ4,E2RPS0,E2RQA6,E2RR16,E2RRW0,E2RTD3,E2RTE0,E2RTI3,F1P890,F1P8N6,F1P9P5,F1PF02,…
biological_process	anatomical structure morphogenesis	A0A140T8E0,A0A140T8E2,B6V8E6,D3YJ60,D5IGD0,E2QRX1,E2QSB9,E2QSE3,E2QTL3,E2QTT8,E2QU10,E2QUK0,E2QUQ0,E2QUV7,E2QVG1,E2QW13,E2QWD3,E2QWE2,E2QWE3,E2QWL1,E2QWM4,E2QWM5,E2QWM9,E2QWR3,E2QXD1,E2QXN9,E2QXY7,E2QXZ2,E2QY07,E2QY08,E2QY31,E2QYU2,E2QYZ4,E2QZ50,E2QZV5,E2R030,E2R0F2,E2R0J2,E2R0R3,E2R198,E2R1C9,E2R1V2,E2R1X9,E2R2C3,E2R2N2,E2R311,E2R400,E2R498,E2R4A3,E2R4J1,E2R4N9,E2R543,E2R612,E2R7F1,E2R7J9,E2R7K6…
biological_process	regulation of proteolysis	E2QS13,E2QT82,E2QWM9,E2QYU2,E2QZB3,E2QZV2,E2R0I8,E2R4A5,E2R8A8,E2RAG6,E2REF0,E2RF39,E2RFW4,E2RGN0,E2RKJ1,E2RLQ9,E2RLS3,E2RPE3,E2RPJ4,E2RPY9,E2RQA6,E2RTD3,F1P890,F1P9P5,F1PAT6,F1PBG7,F1PD77,F1PJ74,F1PLR0,F1PQS2,F1PTL1,F1PX83,F1PZA0,F1Q330,F6UY11,F6Y4Y7,G1K268,J9NRV4,J9NSF9,J9NVT9,J9P4C5,Q9TTY1
biological_process	positive regulation of biological process	A0A0A0MPD6,A0A140T8E0,A0A140T8E2,A2SXS5,A6Q0K4,B6V8E6,D3YJ60,E2QRV2,E2QRX1,E2QS13,E2QS34,E2QSE3,E2QTC7,E2QTL3,E2QTN0,E2QTX0,E2QUE7,E2QUI7,E2QUK0,E2QUQ0,E2QUR8,E2QUU5,E2QUV3,E2QUV7,E2QVF9,E2QW13,E2QW90,E2QWD1,E2QWD3,E2QWE0,E2QWE3,E2QWL1,E2QWM4,E2QWM5,E2QWN7,E2QWR3,E2QWU0,E2QXF0,E2QXF2,E2QXM7,E2QXY7,E2QY30,E2QY31,E2QYH6,E2QYN4,E2QYU2,E2QYZ4,E2QZB3,E2QZN3,E2QZN8,E2QZV2,E2R030,E2R068,E2R0D6,E2R0G3,E2…
biological_process	cell redox homeostasis	E2QWD1,E2R5M7,E2R7L1,E2RB37,E2RD86,E2RDT8,E2RHG2,E2RNL3,E2RNW5,E2RPJ4,E2RRD4,F1PBX0,F1PC59,F1PCG4,F1PFB3,F1PFI3,F1PHP1,F1PL97,F1PLT8,F1PQG3,F1PSK3,F1PY20,J9NWJ5,J9P1H9,P49819
biological_process	regulation of catabolic process	E2QS13,E2QT82,E2QUY7,E2QWM9,E2QWR3,E2QXM7,E2QY31,E2QYN4,E2QYU2,E2QZB3,E2QZV2,E2R0I8,E2R0J2,E2R1S5,E2R4A5,E2R4N9,E2R651,E2R755,E2R8A8,E2R8Y3,E2R990,E2R9E3,E2R9K4,E2R9R1,E2RAG6,E2RAN6,E2RCP9,E2REF0,E2RF39,E2RFC5,E2RFD6,E2RFW4,E2RKJ1,E2RKY4,E2RLQ9,E2RLS3,E2RN02,E2RNT3,E2RPJ4,E2RPS7,E2RPY9,E2RQA6,E2RR33,E2RRC6,E2RT60,E2RT65,E2RTD3,E2RTI3,F1P6C1,F1P9P5,F1P9S5,F1PA22,F1PAT6,F1PBG7,F1PD77,F1PF03,F1PHT0,…
biological_process	regulation of localization	A4GT58,B6V8E6,E2QRX1,E2QS13,E2QS34,E2QSE3,E2QTC7,E2QTL3,E2QTN0,E2QTP7,E2QUQ0,E2QUR8,E2QUV3,E2QW13,E2QWD1,E2QWD3,E2QWM4,E2QWM5,E2QWN7,E2QWR3,E2QXA5,E2QXF2,E2QY08,E2QYN4,E2QYU2,E2QZN8,E2QZV2,E2R030,E2R057,E2R0D2,E2R0R3,E2R1M6,E2R1Z0,E2R2C3,E2R2K4,E2R3V7,E2R400,E2R4A3,E2R4I1,E2R755,E2R792,E2R7F1,E2R7V4,E2R812,E2R912,E2R9K4,E2R9S7,E2RA27,E2RAA0,E2RAI8,E2RAT8,E2RBU1,E2RC33,E2RCI8,E2RD72,E2RE87,E2REK6,…
biological_process	modification-dependent macromolecule catabolic process	E2QRU7,E2QS13,E2QT82,E2QUY7,E2QW34,E2QWM9,E2QX17,E2QXM7,E2QYU2,E2QZB3,E2QZV2,E2R0B6,E2R0I8,E2R129,E2R1C3,E2R1V2,E2R3R2,E2R4A5,E2R4H4,E2R5N5,E2R8A8,E2R9E3,E2RAG6,E2RBR6,E2RCP9,E2RD70,E2RDP4,E2REF0,E2RF02,E2RF27,E2RF39,E2RF52,E2RFW4,E2RIY4,E2RJ26,E2RJH3,E2RKJ1,E2RKR4,E2RKT9,E2RLQ9,E2RMN2,E2RN00,E2RNA6,E2RNY3,E2RPC0,E2RPJ4,E2RPS0,E2RQA6,E2RR16,E2RRW0,E2RTD3,E2RTE0,E2RTI3,F1P890,F1P8N6,F1P9P5,F1PF02,…
biological_process	negative regulation of actin filament depolymerization	A0M8V0,E2QW54,E2QWL1,E2QZE7,E2R1C9,E2R413,E2RGD3,E2RJW9,F1P7P3,F1P9B2,F1PFK0,F1PQS3,F1PXT8,F6X6W7,F6Y3P9,J9P1R0,Q863Z4
biological_process	response to chemical stimulus	A0A0B4J195,A2SXS5,A6Q0K4,B6V8E6,D3YJ60,E2QS13,E2QSB9,E2QSE3,E2QTN0,E2QUG4,E2QUH1,E2QUK0,E2QUR2,E2QUV7,E2QVG1,E2QW13,E2QWD3,E2QWE3,E2QWY6,E2QXD1,E2QXF2,E2QXN9,E2QXY7,E2QY30,E2QY31,E2QYG6,E2QYU2,E2R0D2,E2R0F2,E2R0I8,E2R0J2,E2R0R3,E2R0T6,E2R0X9,E2R1S5,E2R1X9,E2R2G5,E2R2K4,E2R2N2,E2R3V7,E2R400,E2R412,E2R4J1,E2R4L7,E2R5B9,E2R6Q7,E2R755,E2R7F1,E2R7V4,E2R857,E2R912,E2R9N5,E2R9S7,E2RA06,E2RA27,E2RAI8,E2R…
biological_process	regulation of catalytic activity	A1DZY5,A2SXS5,A6Q0K4,B6V8E6,D3YJ60,E2QRV2,E2QS13,E2QTL3,E2QUV3,E2QWE3,E2QWJ6,E2QWM5,E2QWR3,E2QXA6,E2QXF2,E2QXN9,E2QY30,E2QY31,E2QYN4,E2QZV5,E2R030,E2R0D6,E2R0I8,E2R0L9,E2R0S6,E2R0X9,E2R1M6,E2R2N2,E2R2P0,E2R3J1,E2R498,E2R4I1,E2R4N9,E2R651,E2R6Q7,E2R7V4,E2R886,E2R912,E2R9R1,E2RAA0,E2RAI8,E2RC33,E2RD72,E2RDE0,E2REK6,E2RF98,E2RFD6,E2RGF3,E2RGG9,E2RGP2,E2RHY7,E2RHY8,E2RI72,E2RK00,E2RKJ6,E2RKR4,E2RKY4,…
biological_process	nucleocytoplasmic transport	E2QS13,E2QWM5,E2QZX1,E2R1S5,E2R2P0,E2R3V7,E2R4A3,E2R792,E2R9K4,E2RA27,E2RAU5,E2RB34,E2REK5,E2RF06,E2RFW4,E2RH09,E2RNT3,E2RPH1,E2RTB1,F1P8H7,F1PAT6,F1PAY5,F1PB28,F1PFK6,F1PLD5,F1PQ43,F1PS41,F1PUN9,F1PVE3,F1PWW0,F1PZL7,F1Q1K6,F1Q3J6,F2Z4N6,F2Z4P5,F6UV28,F6UV54,F6X4J2,F6X637,F6X725,F6XEL1,J9NST3,J9NZ28,J9NZ53,J9P249,J9P2A6,J9P4N7,J9P558,J9P851,J9PAW2,O02812,P62825,Q5WR10,Q8HY67
biological_process	cell-substrate adhesion	B6V8E6,E2QUQ0,E2QWD3,E2QWR3,E2QY08,E2R030,E2R912,E2R9R1,E2RAA0,E2RCF2,E2REB0,E2RF98,E2RGR7,E2RJT2,E2RLM4,E2RPH7,E2RT60,F1P6H7,F1P7F8,F1PAG6,F1PBI6,F1PCD8,F1PDJ5,F1PE38,F1PFB4,F1PGV4,F1PHK9,F1PKX2,F1PLV6,F1PR95,F1PST8,F1PU60,F1PUI4,F1PUM6,F1PUT6,F1PWW0,F1PXK3,F1PY05,F1PYK5,F1PYQ1,F1Q0H3,F1Q1Q0,F1Q3I5,F6UXL3,F6XY66,J9NTX8,J9NV14,J9P1H1,J9PAW7,P60952
biological_process	ubiquitin-dependent protein catabolic process	E2QRU7,E2QS13,E2QT82,E2QUY7,E2QW34,E2QWM9,E2QX17,E2QXM7,E2QYU2,E2QZB3,E2QZV2,E2R0B6,E2R0I8,E2R129,E2R1C3,E2R1V2,E2R3R2,E2R4A5,E2R4H4,E2R5N5,E2R8A8,E2R9E3,E2RAG6,E2RBR6,E2RCP9,E2RD70,E2RDP4,E2REF0,E2RF02,E2RF27,E2RF39,E2RF52,E2RFW4,E2RIY4,E2RJ26,E2RJH3,E2RKJ1,E2RKR4,E2RKT9,E2RLQ9,E2RMN2,E2RN00,E2RNA6,E2RNY3,E2RPC0,E2RPJ4,E2RPS0,E2RQA6,E2RR16,E2RRW0,E2RTD3,E2RTE0,E2RTI3,F1P8N6,F1P9P5,F1PF02,F1PIC7,…
biological_process	actin filament polymerization	A0M8V0,E2QWL1,E2QWU0,E2QXA5,E2QXY7,E2QZE7,E2R1C9,E2R413,E2R7V4,E2R836,E2RD65,E2RD72,E2RGD3,E2RIQ2,E2RJW9,E2RMT4,F1P679,F1P7P3,F1PA22,F1PAG6,F1PBG7,F1PFK0,F1PJ63,F1PQS3,F1PXT8,F1PZE5,F1Q3Y0,F6X6W7,F6Y3P9,J9NV86,J9NWK4,J9P127,J9P1R0,J9P309,J9P9Z6,Q863Z4
biological_process	regulation of actin filament polymerization	A0M8V0,E2QWL1,E2QWU0,E2QXA5,E2QXY7,E2QZE7,E2R1C9,E2R413,E2R7V4,E2RD65,E2RD72,E2RGD3,E2RIQ2,E2RJW9,E2RMT4,F1P679,F1P7P3,F1PA22,F1PAG6,F1PBG7,F1PFK0,F1PJ63,F1PQS3,F1PXT8,F1Q3Y0,F6X6W7,F6Y3P9,J9NV86,J9NWK4,J9P127,J9P1R0,J9P309,J9P9Z6,Q863Z4
biological_process	cellular protein complex assembly	A0M8V0,E2QWE2,E2QWF5,E2QWL1,E2QWU0,E2QXA5,E2QXY7,E2QYU2,E2QZE7,E2R1C9,E2R413,E2R5N5,E2R7V4,E2R836,E2RAT8,E2RD65,E2RD72,E2RDP4,E2RFV2,E2RGD3,E2RH29,E2RIQ2,E2RJ26,E2RJW9,E2RKS4,E2RMT4,E2RNB6,E2RND5,E2RNF2,E2RNX1,E2RPI9,E2RQE7,E2RS94,E2RSG8,E2RSW0,E2RT63,F1P624,F1P679,F1P7L2,F1P7P3,F1PA22,F1PAG6,F1PAM9,F1PAY5,F1PB24,F1PBG7,F1PDM3,F1PFK0,F1PHQ0,F1PIL5,F1PJ63,F1PQS3,F1PV45,F1PXT8,F1PYQ1,F1PZE5,F1Q0H3,…
biological_process	protein polymerization	A0M8V0,E2QWE2,E2QWL1,E2QWU0,E2QXA5,E2QXY7,E2QZE7,E2R1C9,E2R413,E2R7V4,E2R836,E2RD65,E2RD72,E2RFV2,E2RGD3,E2RIQ2,E2RJW9,E2RMT4,E2RNX1,E2RSW0,F1P679,F1P7P3,F1PA22,F1PAG6,F1PBG7,F1PFK0,F1PIL5,F1PJ63,F1PQS3,F1PXT8,F1PYQ1,F1PZE5,F1Q3Y0,F6X6W7,F6Y3P9,J9NV86,J9NVP2,J9NWK4,J9NZ41,J9P127,J9P1R0,J9P309,J9P9Z6,Q863Z4
biological_process	regulation of translation	E2QUE7,E2QUR2,E2R1J6,E2R1S5,E2R4L7,E2R5Q5,E2R771,E2R7J9,E2R8R8,E2R990,E2RBD1,E2RDZ4,E2REK3,E2RH47,E2RIQ8,E2RIX2,E2RJU3,E2RL17,E2RNT3,E2RPH1,F1P969,F1PBI6,F1PEQ5,F1PGB6,F1PHT0,F1PK74,F1PLD5,F1PLR0,F1PLS4,F1PNF3,F1PQZ7,F1PR95,F1PSC3,F1PUY0,F1Q0B0,F1Q0Z5,F1Q264,F1Q2U8,F6UV28,F6XIK8,F6XRY2,F6XXD6,J9P019,J9PA62
biological_process	nuclear transport	E2QS13,E2QWM5,E2QZX1,E2R1S5,E2R2P0,E2R3V7,E2R4A3,E2R792,E2R9K4,E2RA27,E2RAU5,E2RB34,E2REK5,E2RF06,E2RFW4,E2RH09,E2RNT3,E2RPH1,E2RTB1,F1P8H7,F1PAT6,F1PAY5,F1PB28,F1PFK6,F1PLD5,F1PQ43,F1PS41,F1PUN9,F1PVE3,F1PWW0,F1PZL7,F1Q1K6,F1Q3J6,F2Z4N6,F2Z4P5,F6UV28,F6UV54,F6X4J2,F6X637,F6X725,F6XEL1,J9NST3,J9NZ28,J9NZ53,J9P249,J9P2A6,J9P4N7,J9P558,J9P851,J9PAW2,O02812,P62825,Q5WR10,Q8HY67
biological_process	anatomical structure formation involved in morphogenesis	A0A140T8E2,B6V8E6,D3YJ60,D5IGD0,E2QSE3,E2QTT8,E2QUK0,E2QUQ0,E2QUV7,E2QW13,E2QWE2,E2QWE3,E2QWL1,E2QWM5,E2QY07,E2QY08,E2QY31,E2QZV5,E2R030,E2R0J2,E2R0R3,E2R198,E2R1C9,E2R2C3,E2R2N2,E2R498,E2R4A3,E2R543,E2R7K6,E2R8A8,E2RAA0,E2RCF2,E2RCV4,E2RDB1,E2RF39,E2RFV8,E2RGG9,E2RGI4,E2RGI5,E2RJ14,E2RK00,E2RMA3,E2RNM4,E2RR96,E2RT60,E2RTD3,F1P6B7,F1P6H7,F1P7Z9,F1P912,F1P9J3,F1P9S5,F1PAT6,F1PAY5,F1PBI6,F1PBX0,F1P…
biological_process	blood vessel development	A0A140T8E2,B6V8E6,D3YJ60,D5IGD0,E2QUK0,E2QWE3,E2R030,E2R0J2,E2R0R3,E2R198,E2R2N2,E2RAA0,E2RCF2,E2RCV4,E2RDB1,E2RF39,E2RF98,E2RGG9,E2RGI4,E2RIV1,E2RJ14,E2RJE0,E2RMA3,E2RNC3,E2RR96,E2RT60,F1P6B7,F1P7Z9,F1P9J3,F1PBI6,F1PE38,F1PE53,F1PEC4,F1PGZ1,F1PHH3,F1PHX8,F1PHY1,F1PJ74,F1PK29,F1PKH2,F1PLA1,F1PLK4,F1PM34,F1PMK7,F1PQC4,F1PQZ7,F1PR66,F1PST8,F1PSX9,F1PTF8,F1PU60,F1PUI4,F1PVL7,F1PVV7,F1PWK3,F1PWM7,F1P…
biological_process	protein refolding	E2QTC7,E2QUU5,E2R0T6,E2R198,E2R7F3,E2RAU5,E2RN10,F1PIC7,F1PP91,G1K268,H9GW49,J9NU25,J9NUZ6,J9NV93,J9NXS3,J9P7U8
biological_process	formation of translation initiation complex	E2QUU1,E2QWG8,E2R1J6,E2REK3,E2RGG6,E2RQP6,E2RSR5,F1P969,F1PHR6,F1PPR0,F1PU02,J9NTR8
biological_process	cellular response to organic substance	A0A0B4J195,A2SXS5,B6V8E6,D3YJ60,E2QSB9,E2QSE3,E2QTN0,E2QUH1,E2QUR2,E2QUV7,E2QVG1,E2QWE3,E2QWY6,E2QXF2,E2QXY7,E2QY30,E2QY31,E2R0F2,E2R0I8,E2R0J2,E2R0T6,E2R0X9,E2R2K4,E2R2N2,E2R3V7,E2R412,E2R6Q7,E2R755,E2R7F1,E2R7V4,E2R9S7,E2RA06,E2RA27,E2RAI8,E2RAU5,E2RBU1,E2RBW8,E2RC33,E2RCF2,E2RCN3,E2REF0,E2RF06,E2RF98,E2RFW4,E2RGD3,E2RL11,E2RLF1,E2RLQ9,E2RMA3,E2RNE1,E2RNT3,E2RNW5,E2RPB8,E2RQ14,E2RQL3,E2RQV6,E2R…
biological_process	regulation of biological quality	A0A0B4J195,A0A140T8E2,A0M8V0,A6Q0K4,B6V8E6,E2QRV2,E2QRX1,E2QS13,E2QSB9,E2QSE3,E2QTL3,E2QTN0,E2QUK0,E2QUQ0,E2QVA7,E2QVP6,E2QW13,E2QW54,E2QWD1,E2QWD3,E2QWL1,E2QWM4,E2QWM5,E2QWR3,E2QWU0,E2QX69,E2QXA5,E2QXD1,E2QXF2,E2QXN9,E2QXP3,E2QXY7,E2QXZ2,E2QY30,E2QY31,E2QYG6,E2QYH6,E2QYN4,E2QYU2,E2QYZ9,E2QZE7,E2QZN3,E2R0J2,E2R0L9,E2R0R3,E2R0T6,E2R0X9,E2R1A0,E2R1C9,E2R1E3,E2R1Z0,E2R2C3,E2R2K4,E2R2N2,E2R400,E2R412…
biological_process	regulation of molecular function	A1DZY5,A2SXS5,A6Q0K4,B6V8E6,D3YJ60,E2QRV2,E2QS13,E2QSE3,E2QTL3,E2QUQ0,E2QUV3,E2QVG1,E2QWD1,E2QWD3,E2QWE0,E2QWE3,E2QWJ6,E2QWM5,E2QWR3,E2QXA6,E2QXF2,E2QXM7,E2QXN9,E2QY30,E2QY31,E2QYN4,E2QYU2,E2QZV2,E2QZV5,E2R030,E2R0D6,E2R0I8,E2R0L9,E2R0S6,E2R0X9,E2R1M6,E2R1Z0,E2R2F2,E2R2N2,E2R2P0,E2R3J1,E2R3V7,E2R498,E2R4I1,E2R4N9,E2R651,E2R6Q7,E2R7V4,E2R886,E2R912,E2R9R1,E2RAA0,E2RAI8,E2RC33,E2RD72,E2RDE0,E2REK6,…
biological_process	vasculature development	A0A140T8E2,B6V8E6,D3YJ60,D5IGD0,E2QUK0,E2QWE3,E2R030,E2R0J2,E2R0R3,E2R198,E2R2N2,E2RAA0,E2RCF2,E2RCV4,E2RDB1,E2RF39,E2RF98,E2RGG9,E2RGI4,E2RIV1,E2RJ14,E2RJE0,E2RMA3,E2RNC3,E2RR96,E2RT60,F1P6B7,F1P7Z9,F1P9J3,F1PBI6,F1PE38,F1PE53,F1PEC4,F1PGZ1,F1PHH3,F1PHX8,F1PHY1,F1PJ74,F1PK29,F1PKH2,F1PLA1,F1PLK4,F1PM34,F1PMK7,F1PQC4,F1PQZ7,F1PR66,F1PST8,F1PSX9,F1PTF8,F1PU60,F1PUI4,F1PUN9,F1PVL7,F1PVV7,F1PWK3,F1P…
biological_process	negative regulation of protein polymerization	A0M8V0,E2QWL1,E2QXA5,E2QZE7,E2R1C9,E2R413,E2RFV2,E2RGD3,E2RJW9,F1P7P3,F1PA22,F1PFK0,F1PQS3,F1PXT8,F1Q3Y0,F6X6W7,F6Y3P9,J9NVP2,J9P127,J9P1R0,Q863Z4
biological_process	negative regulation of cellular protein metabolic process	A2SXS5,B6V8E6,E2QS13,E2QT82,E2QUR2,E2QWM9,E2QZV2,E2QZV5,E2R030,E2R0G3,E2R0I8,E2R0X9,E2R2P0,E2R4A3,E2R5Q5,E2R8A8,E2R912,E2R990,E2RAG6,E2RBU1,E2RCF2,E2RCH8,E2RCZ7,E2RDZ4,E2REF0,E2RF39,E2RF98,E2RGG9,E2RKJ1,E2RL17,E2RLS3,E2RM91,E2RPJ4,E2RQW2,E2RRD1,E2RSU6,F1P914,F1PEQ5,F1PEQ7,F1PGB6,F1PHT0,F1PIA2,F1PJ74,F1PKU3,F1PKW7,F1PLR0,F1PM26,F1PNF3,F1PQL2,F1PQS2,F1PQZ7,F1PRR3,F1PS57,F1PSC3,F1PX83,F1PZA0,F1Q0B0,…
biological_process	regulation of cell-substrate adhesion	E2QWD3,E2QWR3,E2R030,E2R912,E2R9R1,E2RAA0,E2RCF2,E2REB0,E2RF98,E2RGR7,E2RJT2,E2RLM4,E2RPH7,F1PAG6,F1PBI6,F1PDJ5,F1PE38,F1PKX2,F1PLV6,F1PR95,F1PST8,F1PU60,F1PUI4,F1PUM6,F1PWW0,F1PXK3,F1PYK5,F1PYQ1,F1Q1Q0,F1Q3I5,F6UXL3,F6XY66,J9P1H1,J9PAW7,P60952
biological_process	response to heat	E2QTT8,E2R0T6,E2R7F3,E2RA27,E2RAU5,E2REJ7,E2RLQ9,E2RM67,E2RPH1,E2RPJ4,E2RQW2,F1PAT6,F1PGY1,F1PIC7,F1PIL5,F1PP91,F1Q1H3,F1Q462,F6UV28,G1K268,H9GW49,J9NU25,J9P3K0,P05123,Q3YIX4
biological_process	negative regulation of molecular function	A2SXS5,E2QS13,E2QUQ0,E2QUV3,E2QWM5,E2QWR3,E2QXA6,E2QXM7,E2QYN4,E2QZV5,E2R0I8,E2R0S6,E2R0X9,E2R1M6,E2R2P0,E2R3J1,E2R7V4,E2R886,E2R912,E2RAI8,E2RC33,E2REK6,E2RFW4,E2RGF3,E2RGG9,E2RGJ1,E2RGP2,E2RHY7,E2RI72,E2RKJ6,E2RM91,E2RN10,E2RNB6,E2RNE1,E2RPC0,E2RQW2,E2RRC6,E2RRD1,E2RSS4,F1P624,F1P6B7,F1P6C1,F1P914,F1P9S0,F1PBI6,F1PBZ4,F1PCG4,F1PD37,F1PDJ5,F1PE53,F1PIV3,F1PJ74,F1PKH2,F1PLK4,F1PQL2,F1PQQ4,F1PQS2,…
biological_process	regulation of RNA splicing	E2QXZ2,E2R068,E2R0G3,E2R6E4,E2R771,E2R7P6,E2R7Z2,E2R8D6,E2R8L3,E2R944,E2RB90,E2RDB2,E2RJL3,E2RQR0,F1PB28,F1PBJ4,F1PC59,F1PEA6,F1PEZ0,F1PLD5,F1PR95,F1PTE0,F1Q1K6,F1Q2U8,F2Z4N6,F6V5G7,F6XAE9,J9JHP7,J9NZV9,J9P2I8,J9P969
biological_process	regulation of hydrolase activity	A1DZY5,E2QS13,E2QTL3,E2QUV3,E2QWJ6,E2QWR3,E2QXA6,E2QXF2,E2QY30,E2QY31,E2QYN4,E2R0D6,E2R0S6,E2R4I1,E2R4N9,E2R651,E2R7V4,E2R886,E2R912,E2R9R1,E2RAA0,E2RC33,E2REK6,E2RFD6,E2RGP2,E2RHY7,E2RHY8,E2RI72,E2RK00,E2RKJ6,E2RKR4,E2RKY4,E2RLF1,E2RLQ9,E2RNB6,E2RNE1,E2RNT3,E2RPS7,E2RPY9,E2RRC6,E2RT60,F1P6B7,F1P6C1,F1P8N6,F1P9S0,F1P9S5,F1PA22,F1PBG7,F1PBI6,F1PD37,F1PD77,F1PDJ5,F1PE53,F1PIV3,F1PJ65,F1PKH2,F1PLK4,…
biological_process	regulation of mRNA processing	E2QXZ2,E2QYH6,E2R068,E2R0G3,E2R4A3,E2R6E4,E2R771,E2R7P6,E2R7Z2,E2R8L3,E2R944,E2R990,E2RDB2,E2RJL3,E2RNT3,E2RQR0,F1PC59,F1PDS0,F1PEA6,F1PEZ0,F1PLD5,F1PQZ7,F1PR95,F1PTE0,F1Q1K6,F1Q2U8,F2Z4N6,F6V5G7,F6XAE9,J9P2I8,J9P326
biological_process	negative regulation of actin filament polymerization	A0M8V0,E2QWL1,E2QXA5,E2QZE7,E2R1C9,E2R413,E2RGD3,E2RJW9,F1P7P3,F1PA22,F1PFK0,F1PQS3,F1PXT8,F1Q3Y0,F6X6W7,F6Y3P9,J9P127,J9P1R0,Q863Z4
biological_process	chaperone-mediated protein folding	E2QTC7,E2QWF5,E2QYU2,E2R0T6,E2RAU5,E2RMC1,E2RNW5,E2RQW2,F1PIC7,F1PLV2,F1PWM7,F1PYE3,F6V0D8,F6V735,F6V9Q0,G1K268,H9GW49,J9NU25,P42929
biological_process	endocytosis	A0A140T8E2,E2QSE3,E2QTP7,E2QUR8,E2QUV3,E2QYI2,E2QYU2,E2QZN8,E2R030,E2R651,E2RAE6,E2REI0,E2RFW4,E2RN10,E2RNC3,E2RPI9,E2RR96,E2RRD2,E2RSI6,E2RT60,E2RTI3,F1P6B7,F1P9J3,F1PAM9,F1PB24,F1PBG7,F1PBI6,F1PDJ5,F1PDT7,F1PE38,F1PER9,F1PFZ5,F1PGG9,F1PGV4,F1PHP1,F1PHQ0,F1PJ63,F1PJ74,F1PK00,F1PLR0,F1PM34,F1PN76,F1PNP7,F1PPW5,F1PQL2,F1PQM7,F1PSK6,F1PU60,F1PUI4,F1PUM6,F1Q0H3,F1Q2U8,F1Q462,F2Z4P5,F6PME1,F6UT62,F6V…
biological_process	actin filament capping	A0M8V0,E2QWL1,E2QZE7,E2R1C9,E2R413,E2RGD3,E2RJW9,F1P7P3,F1PFK0,F1PQS3,F1PXT8,F6X6W7,F6Y3P9,J9P1R0,Q863Z4
biological_process	regulation of anatomical structure morphogenesis	A0A140T8E0,A0A140T8E2,B6V8E6,D3YJ60,D5IGD0,E2QRX1,E2QSB9,E2QSE3,E2QTL3,E2QWD3,E2QWE3,E2QWM5,E2QWR3,E2QXD1,E2QY31,E2R030,E2R0R3,E2R400,E2R498,E2R4N9,E2R7F1,E2RBU1,E2RBW8,E2RCF2,E2RCV4,E2RD72,E2RF39,E2RF98,E2RFV8,E2RFW4,E2RGD3,E2RGF3,E2RGG9,E2RGI5,E2RIL1,E2RMA3,E2RPE3,E2RRC6,E2RRN8,E2RSI6,E2RT60,E2RTE0,F1P6B7,F1P6H7,F1P912,F1P9J3,F1P9Q2,F1P9S5,F1P9U4,F1PAG5,F1PAG6,F1PAY5,F1PBI6,F1PDJ5,F1PE53,F1PEC4…
biological_process	small molecule metabolic process	A0A0A0MPD0,A0A0A0MPD3,A0A0B4J194,A0A0B4J195,A0A2Z5XAD4,B4YY02,B6V8E6,E2QRQ8,E2QRR5,E2QU31,E2QU97,E2QUI9,E2QUK0,E2QUR2,E2QV08,E2QV97,E2QVA7,E2QWC1,E2QWR3,E2QX53,E2QXI3,E2QXN9,E2QXS7,E2QY31,E2QYG6,E2QYN4,E2QYQ0,E2QZ13,E2QZ69,E2R095,E2R0I8,E2R0I9,E2R0T6,E2R1E3,E2R1S5,E2R1U9,E2R2N2,E2R311,E2R3N2,E2R3Y5,E2R431,E2R4D5,E2R4L7,E2R4N9,E2R507,E2R543,E2R599,E2R5B9,E2R5R9,E2R5Z9,E2R651,E2R761,E2R7C2,E2R832,E…
biological_process	regulation of protein polymerization	A0M8V0,E2QWL1,E2QWU0,E2QXA5,E2QXY7,E2QZE7,E2R1C9,E2R413,E2R7V4,E2RD65,E2RD72,E2RFV2,E2RGD3,E2RIQ2,E2RJW9,E2RMT4,F1P679,F1P7P3,F1PA22,F1PAG6,F1PBG7,F1PFK0,F1PJ63,F1PQS3,F1PXT8,F1PYQ1,F1Q3Y0,F6X6W7,F6Y3P9,J9NV86,J9NVP2,J9NWK4,J9P127,J9P1R0,J9P309,J9P9Z6,Q863Z4
biological_process	proteasomal ubiquitin-independent protein catabolic process	E2QW34,E2QX17,E2R0B6,E2R1C3,E2R3R2,E2R4H4,E2RBR6,E2RF52,E2RKR4,E2RMN2,F1PF02,F1PUB5,J9JHW4,J9P9G4
biological_process	anatomical structure development	A0A0A0MPC5,A0A0A0MPD6,A0A140T8E0,A0A140T8E2,A2SXS5,A6Q0K4,B6V8E6,D3YJ60,D5IGD0,E2QRQ8,E2QRX1,E2QSB9,E2QSE3,E2QTL3,E2QTT8,E2QU10,E2QUG4,E2QUK0,E2QUQ0,E2QUV3,E2QUV7,E2QV07,E2QVF9,E2QVG1,E2QVP6,E2QW13,E2QWD3,E2QWE2,E2QWE3,E2QWF5,E2QWL1,E2QWM4,E2QWM5,E2QWM9,E2QWR3,E2QX86,E2QXD1,E2QXM7,E2QXN9,E2QXY7,E2QXZ2,E2QY07,E2QY08,E2QY30,E2QY31,E2QYN4,E2QYU2,E2QYZ4,E2QZ11,E2QZ50,E2QZN3,E2QZN8,E2QZV2,E2QZV5,E2R02…
biological_process	regulation of cell adhesion	E2QSE3,E2QWD3,E2QWR3,E2R030,E2R7V4,E2R912,E2R9R1,E2RAA0,E2RCF2,E2REB0,E2RF98,E2RGR7,E2RJT2,E2RLM4,E2RPD3,E2RPH7,E2RRC6,F1P7S9,F1P9B2,F1P9S5,F1PAG6,F1PBI6,F1PDJ5,F1PE38,F1PEZ5,F1PG65,F1PK00,F1PKH2,F1PKX2,F1PKY3,F1PLV6,F1PQM7,F1PR66,F1PR95,F1PST8,F1PSX9,F1PU60,F1PUI4,F1PUM6,F1PV78,F1PWW0,F1PXK3,F1PYK5,F1PYQ1,F1Q1Q0,F1Q3I5,F1Q3J6,F2Z4P5,F6UXL3,F6XY66,F6Y2H4,J9P1H1,J9P249,J9PAW7,P60952,Q863H1,Q867A1
biological_process	single-organism developmental process	A0A0A0MPD6,A0A140T8E0,A0A140T8E2,A2SXS5,A6Q0K4,B6V8E6,D3YJ60,D5IGD0,E2QRQ8,E2QSB9,E2QSE3,E2QTL3,E2QTT8,E2QU10,E2QUK0,E2QUQ0,E2QUV7,E2QV07,E2QVF9,E2QVG1,E2QVP6,E2QW13,E2QWD3,E2QWE2,E2QWE3,E2QWF5,E2QWL1,E2QWM4,E2QWM5,E2QWM9,E2QWR3,E2QXD1,E2QXN9,E2QXY7,E2QXZ2,E2QY07,E2QY08,E2QY30,E2QY31,E2QYN4,E2QYU2,E2QYZ4,E2QZ11,E2QZ50,E2QZN3,E2QZN8,E2QZV5,E2R027,E2R030,E2R0F2,E2R0J2,E2R0R3,E2R0Z6,E2R198,E2R1C9,E2…
biological_process	positive regulation of cell-substrate adhesion	E2QWD3,E2R912,E2R9R1,E2RAA0,E2RCF2,E2REB0,E2RF98,E2RGR7,E2RLM4,E2RPH7,F1PAG6,F1PDJ5,F1PE38,F1PKX2,F1PR95,F1PST8,F1PU60,F1PUM6,F1PWW0,F1PXK3,F1PYK5,F1PYQ1,J9P1H1,P60952
biological_process	multi-organism reproductive process	E2QTC7,E2QWF5,E2QXN9,E2QZN8,E2R198,E2R3V7,E2R412,E2R6E4,E2R6Q7,E2R9E3,E2RAT8,E2RGE0,E2RIY4,E2RLQ9,E2RNT3,E2RPE3,E2RR01,E2RRB7,F1P9H9,F1PAM9,F1PEQ5,F1PGB6,F1PGV4,F1PHT0,F1PJ74,F1PKY3,F1PL97,F1PMK7,F1PQS2,F1PQZ7,F1PR95,F1PSX9,F1PTL1,F1PZ83,F1Q0H3,F1Q2U8,F1Q462,F6UT62,F6XEL1,F6Y2H4,F6Y3P9,J9NST3,J9NXZ3,J9P326,J9P7U8,J9PBB8,P18067,Q5WR10,Q9TSZ6
biological_process	mitochondrial electron transport, NADH to ubiquinone	J9P556
biological_process	negative regulation of protein complex assembly	A0M8V0,E2QRX1,E2QWL1,E2QXA5,E2QYU2,E2QZE7,E2R0I8,E2R1C9,E2R413,E2RFV2,E2RGD3,E2RJW9,E2RNB6,F1P7P3,F1PA22,F1PFK0,F1PQS3,F1PXT8,F1Q3Y0,F2Z4Q6,F6X6W7,F6Y3P9,J9NVP2,J9P127,J9P1R0,J9P9V1,Q863Z4
biological_process	response to organic substance	A0A0B4J195,A2SXS5,B6V8E6,D3YJ60,E2QSB9,E2QSE3,E2QTN0,E2QUG4,E2QUH1,E2QUR2,E2QUV7,E2QVG1,E2QWE3,E2QWY6,E2QXF2,E2QXN9,E2QXY7,E2QY30,E2QY31,E2QYU2,E2R0D2,E2R0F2,E2R0I8,E2R0J2,E2R0T6,E2R0X9,E2R1S5,E2R2K4,E2R2N2,E2R3V7,E2R412,E2R4L7,E2R5B9,E2R6Q7,E2R755,E2R7F1,E2R7V4,E2R9S7,E2RA06,E2RA27,E2RAI8,E2RAU5,E2RBU1,E2RBV8,E2RBW8,E2RC33,E2RCF2,E2RCN3,E2REF0,E2RF06,E2RF98,E2RFW4,E2RGD3,E2RJE0,E2RL11,E2RLF1,E2R…
biological_process	regulation of mRNA splicing, via spliceosome	E2QXZ2,E2R068,E2R0G3,E2R6E4,E2R771,E2R7P6,E2R7Z2,E2R8L3,E2R944,E2RDB2,E2RJL3,E2RQR0,F1PC59,F1PEA6,F1PEZ0,F1PLD5,F1PR95,F1PTE0,F1Q1K6,F1Q2U8,F2Z4N6,F6V5G7,F6XAE9,J9P2I8
biological_process	cell adhesion	B6V8E6,D5IGD0,E2QSE3,E2QUG4,E2QUQ0,E2QWD3,E2QWR3,E2QXF0,E2QY08,E2R030,E2R1I9,E2R7F1,E2R7V4,E2R912,E2R9R1,E2R9S7,E2RAA0,E2RCF2,E2REB0,E2RF98,E2RGR7,E2RJ75,E2RJE0,E2RJT2,E2RLM4,E2RNL2,E2RPD3,E2RPH7,E2RRC6,E2RSC5,E2RSI6,E2RT60,F1P6H7,F1P6H9,F1P6U6,F1P7F8,F1P7S9,F1P9B2,F1P9S5,F1PAG6,F1PBI6,F1PCD8,F1PDJ5,F1PDR0,F1PE38,F1PE64,F1PEC4,F1PEZ5,F1PF31,F1PFB4,F1PG65,F1PGL1,F1PGV4,F1PGZ1,F1PHK9,F1PHX8,F1PIA3,…
biological_process	sensory perception	A6Q0K4,E2QUK0,E2QWM4,E2QZX7,E2R416,E2R4J1,E2RGF3,E2RLF1,E2RMY4,E2RTD3,F1Q3I5,F1Q462,F6Y2H4,Q5JZQ9,Q9XT54
biological_process	regulation of metabolic process	A0A0A0MPC5,A0A0A0MPD6,A1DZY5,A2SXS5,A6Q0K4,B6V8E6,D3YJ60,E2QRQ8,E2QRV2,E2QRX1,E2QS13,E2QS34,E2QSE3,E2QT82,E2QTC7,E2QTL3,E2QTX0,E2QUE7,E2QUK0,E2QUR2,E2QUR8,E2QUV3,E2QUV7,E2QUY7,E2QV07,E2QVF9,E2QVG1,E2QVN6,E2QW13,E2QW90,E2QWE0,E2QWE3,E2QWJ6,E2QWM4,E2QWM5,E2QWM9,E2QWR3,E2QX33,E2QX86,E2QXA6,E2QXC6,E2QXD1,E2QXF2,E2QXM7,E2QXN9,E2QXY7,E2QXZ2,E2QY30,E2QY31,E2QYH6,E2QYK6,E2QYN4,E2QYU2,E2QYZ4,E2QZB3,E2QZN8…
biological_process	cellular component morphogenesis	A0A140T8E0,B6V8E6,E2QSB9,E2QSE3,E2QTL3,E2QUQ0,E2QWD3,E2QWE2,E2QWL1,E2QWM4,E2QWR3,E2QXD1,E2QXY7,E2QXZ2,E2QY07,E2QY08,E2QY31,E2QYU2,E2QYZ4,E2QZ50,E2QZV5,E2R030,E2R0F2,E2R0R3,E2R1C9,E2R1X9,E2R400,E2R498,E2R4J1,E2R4N9,E2R7F1,E2R7J9,E2R7K6,E2RBD1,E2RBU1,E2RCV4,E2RD72,E2RDX1,E2RF98,E2RFW4,E2RGD3,E2RGF3,E2RH53,E2RIL1,E2RJ14,E2RJW9,E2RK00,E2RLF1,E2RMA3,E2RNM4,E2RPE3,E2RR96,E2RRC6,E2RRN8,E2RSI6,E2RT60,E2R…
biological_process	biological adhesion	B6V8E6,D5IGD0,E2QSE3,E2QUG4,E2QUQ0,E2QWD3,E2QWR3,E2QXF0,E2QY08,E2R030,E2R1I9,E2R7F1,E2R7V4,E2R912,E2R9R1,E2R9S7,E2RAA0,E2RCF2,E2REB0,E2RF98,E2RGR7,E2RJ75,E2RJE0,E2RJT2,E2RLM4,E2RNL2,E2RPD3,E2RPH7,E2RRC6,E2RSC5,E2RSI6,E2RT60,F1P6H7,F1P6H9,F1P6U6,F1P7F8,F1P7S9,F1P9B2,F1P9S5,F1PAG6,F1PBI6,F1PCD8,F1PDJ5,F1PDR0,F1PE38,F1PE64,F1PEC4,F1PEZ5,F1PF31,F1PFB4,F1PG65,F1PGL1,F1PGV4,F1PGZ1,F1PHK9,F1PHX8,F1PIA3,…
biological_process	ER to Golgi vesicle-mediated transport	A0A0A0MPC5,E2QWX5,E2R667,E2R812,E2R8Y3,E2R9A2,E2RAT6,E2RB31,E2REI7,E2REP2,E2RH29,E2RPG9,E2RRB7,E2RSG8,E2RT72,F1PDM3,F1PFR1,F1PID0,F1PQ80,F1PRT4,F1PU58,F1PU93,F1Q043,F1Q0H3,F1Q1H3,J9JHK6,J9NRG5,J9P1Q5
biological_process	cellular membrane organization	B6V8E6,E2QSE3,E2QTL3,E2QUQ0,E2QWE3,E2QWM4,E2QXF0,E2QY31,E2QYN4,E2QYU2,E2R236,E2R4Q2,E2R7V4,E2R812,E2R8C6,E2R8Y3,E2RAT8,E2RC33,E2RCI8,E2RD72,E2REP2,E2RFI6,E2RGF3,E2RH29,E2RHY8,E2RIL1,E2RMB9,E2RNC3,E2RND5,E2RPI9,E2RRB7,E2RRC6,E2RSG8,E2RSI6,E2RSX0,E2RT63,E2RT72,F1P6B7,F1P9J3,F1PAG5,F1PAM9,F1PB24,F1PBG7,F1PBI6,F1PDM3,F1PE53,F1PEC4,F1PFB4,F1PFZ5,F1PGG9,F1PHQ0,F1PHX8,F1PJ63,F1PJ74,F1PKH2,F1PN76,F1PNP7,…
biological_process	negative regulation of protein depolymerization	A0M8V0,E2QRV2,E2QW54,E2QWL1,E2QZE7,E2R1C9,E2R413,E2RGD3,E2RJW9,E2RNX1,F1P7P3,F1P9B2,F1PFK0,F1PQS3,F1PXT8,F6X6W7,F6Y3P9,J9P1R0,Q863Z4
biological_process	gene expression	A0A0A0MPC5,A0A0A0MPD2,A0A0A0MPD6,A0A0A0MPE1,A2SXS5,A6Q0K4,B6V8E6,D0VWQ3,E2QRQ8,E2QRR5,E2QRX1,E2QS13,E2QS34,E2QSE3,E2QTC7,E2QTX0,E2QU31,E2QUE2,E2QUE7,E2QUJ4,E2QUK0,E2QUR2,E2QUR8,E2QUU1,E2QUV7,E2QV97,E2QVG1,E2QVG7,E2QVN6,E2QW13,E2QW27,E2QWE0,E2QWE3,E2QWG8,E2QWM5,E2QWY6,E2QX33,E2QX69,E2QX86,E2QXC6,E2QXD1,E2QXF2,E2QXF3,E2QXI3,E2QXM7,E2QXY7,E2QXZ2,E2QY30,E2QYH6,E2QYJ4,E2QYK6,E2QYU2,E2QYZ4,E2QYZ9,E2QZ6…
biological_process	negative regulation of cellular component organization	A0M8V0,A6Q0K4,B6V8E6,E2QRV2,E2QRX1,E2QSB9,E2QW54,E2QWL1,E2QWR3,E2QXA5,E2QYU2,E2QZE7,E2R0I8,E2R0R3,E2R1C9,E2R400,E2R413,E2R4A3,E2RAG6,E2RBU1,E2RC33,E2RCZ7,E2RD94,E2RFV2,E2RGD3,E2RH71,E2RJW9,E2RKK6,E2RN10,E2RNB6,E2RNX1,E2RR96,E2RRN8,E2RTI3,F1P7P3,F1P9B2,F1PA22,F1PAG5,F1PDJ5,F1PFK0,F1PGG9,F1PI20,F1PIA2,F1PJ74,F1PLR0,F1PLS4,F1PLV6,F1PP91,F1PQL2,F1PQS3,F1PRK3,F1PRL5,F1PXT8,F1Q1Q0,F1Q3Y0,F1Q3Y2,F2Z4P5,…
biological_process	membrane budding	E2REP2,E2RH29,E2RNC3,E2RPI9,E2RRB7,E2RSG8,E2RT72,F1PAM9,F1PB24,F1PDM3,F1PHQ0,F1PU58,F1Q0H3,F1Q1H3,F6UT62,F6X5M3,J9JHK6,J9NZJ6,J9P0D5,J9P1Q5,Q6TEQ7
biological_process	collagen fibril organization	E2QYZ4,E2R030,E2R416,E2RCV4,E2RHY7,E2RJE0,E2RLB8,E2RTL4,F1PG08,F1PHX8,F1PHY1,F1PKH2,F1PZL5,F1Q3I5,F6XWS5,J9NZK5,Q6TEQ7
biological_process	membrane organization	B6V8E6,E2QSE3,E2QTL3,E2QUQ0,E2QWE3,E2QWM4,E2QXF0,E2QY31,E2QYN4,E2QYU2,E2R236,E2R498,E2R4Q2,E2R7V4,E2R812,E2R8C6,E2R8Y3,E2RAT8,E2RC33,E2RCI8,E2RD72,E2REP2,E2RFI6,E2RGF3,E2RH29,E2RHY8,E2RIL1,E2RMB9,E2RNC3,E2RND5,E2RPI9,E2RRB7,E2RRC6,E2RSG8,E2RSI6,E2RSX0,E2RT63,E2RT72,F1P6B7,F1P9J3,F1PAG5,F1PAM9,F1PB24,F1PBG7,F1PBI6,F1PDM3,F1PE53,F1PEC4,F1PFB4,F1PFZ5,F1PGG9,F1PHQ0,F1PHX8,F1PJ63,F1PJ74,F1PKH2,F1PN76,…
biological_process	regulation of cellular catabolic process	E2QS13,E2QT82,E2QWM9,E2QWR3,E2QXM7,E2QY31,E2QYN4,E2QYU2,E2QZB3,E2QZV2,E2R0I8,E2R1S5,E2R4A5,E2R4N9,E2R651,E2R8A8,E2R990,E2R9R1,E2RAG6,E2RAN6,E2REF0,E2RF39,E2RFC5,E2RFD6,E2RFW4,E2RKJ1,E2RKY4,E2RLQ9,E2RLS3,E2RN02,E2RNT3,E2RPJ4,E2RPS7,E2RPY9,E2RQA6,E2RRC6,E2RT60,E2RT65,E2RTD3,E2RTI3,F1P6C1,F1P9P5,F1P9S5,F1PA22,F1PAT6,F1PBG7,F1PD77,F1PHT0,F1PID0,F1PJ65,F1PJ74,F1PLR0,F1PLT8,F1PNF3,F1PQS2,F1PQZ7,F1PTL1,…
biological_process	cell junction assembly	B6V8E6,E2QSE3,E2QUQ0,E2QWR3,E2QY08,E2R030,E2R2K4,E2R912,E2R9S7,E2RD72,E2RL77,F1P6H7,F1P6U6,F1PAT6,F1PE38,F1PEC4,F1PFB4,F1PHK9,F1PHS5,F1PQM7,F1PR93,F1PSC2,F1PU60,F1PY05,F1PYQ1,F1PYU3,F1Q147,F1Q1Q0,F6XY66,J9P0W8,J9P4F3,J9PAW7,O97758,P60952
biological_process	regulation of vesicle-mediated transport	A4GT58,E2QSE3,E2QTP7,E2QUQ0,E2QUV3,E2QYU2,E2QZN8,E2R030,E2R2K4,E2R7F1,E2R812,E2RAT8,E2RFW4,E2RN10,E2RPG3,E2RQE7,E2RRC6,E2RRD2,E2RSI6,E2RTI3,F1P6B7,F1PA22,F1PDJ5,F1PE38,F1PEH0,F1PFR1,F1PFZ5,F1PGV4,F1PGZ1,F1PJ63,F1PJ74,F1PJM7,F1PK00,F1PL90,F1PLR0,F1PM34,F1PN76,F1PNP7,F1PQ58,F1PQL2,F1PSK6,F1PU60,F1PUI4,F1PUM6,F1Q260,F1Q2U8,F1Q462,F2Z4P5,F6PME1,F6UT62,F6V735,J9JHN1,J9NZ03,J9P315,J9P396,P62490,Q6TEQ7,…
biological_process	oxoacid metabolic process	A0A0B4J194,A0A0B4J195,A0A2Z5XAD4,B6V8E6,E2QRQ8,E2QRR5,E2QU31,E2QU97,E2QUR2,E2QV08,E2QV97,E2QX53,E2QXI3,E2QXN9,E2QXS7,E2QZ13,E2QZ69,E2R1E3,E2R1S5,E2R311,E2R3N2,E2R431,E2R4D5,E2R4L7,E2R507,E2R543,E2R599,E2R5B9,E2R761,E2R7C2,E2R857,E2RA59,E2RAE2,E2RAM9,E2RDN1,E2REH5,E2RF46,E2RFC5,E2RFD0,E2RFL0,E2RGG9,E2RGR9,E2RH59,E2RHR7,E2RHW7,E2RKY4,E2RLB8,E2RLU9,E2RND5,E2RNL3,E2RNQ8,E2RNW5,E2RPJ4,E2RPN5,E2RS63,E2…
biological_process	angiogenesis	A0A140T8E2,B6V8E6,D3YJ60,D5IGD0,E2QUK0,E2QWE3,E2R030,E2R198,E2RAA0,E2RCF2,E2RCV4,E2RF39,E2RGG9,E2RGI4,E2RJ14,E2RMA3,E2RR96,E2RT60,F1P6B7,F1P7Z9,F1P9J3,F1PBI6,F1PE38,F1PE53,F1PGZ1,F1PK29,F1PKH2,F1PLK4,F1PQC4,F1PQZ7,F1PST8,F1PSX9,F1PTF8,F1PU60,F1PUI4,F1PVL7,F1PWK3,F1PWM7,F1PYE3,F1PZ83,F1Q0B0,F1Q129,F1Q133,F1Q1H3,F2Z4Q7,F6X8E7,F6XY66,J9NTX8,J9NV14,J9P4N7,J9P530,J9P7C4,O02812,P79143,Q29393,Q32KH2,Q6Q…
biological_process	negative regulation of protein catabolic process	E2QS13,E2QT82,E2QWM9,E2QZV2,E2RAG6,E2REF0,E2RKJ1,E2RLS3,E2RR33,F1P6C1,F1PF03,F1PQS2,F1PWW0,F1PX83,F1PZA0,F6UT62,F6Y2H4,J9NS29,J9NVT9,Q6TEQ7,Q9TTY1
biological_process	developmental process	A0A0A0MPC5,A0A0A0MPD0,A0A0A0MPD6,A0A140T8E0,A0A140T8E2,A2SXS5,A6Q0K4,B6V8E6,D3YJ60,D5IGD0,E2QRQ8,E2QRX1,E2QSB9,E2QSE3,E2QTL3,E2QTT8,E2QU10,E2QUG4,E2QUK0,E2QUQ0,E2QUV3,E2QUV7,E2QV07,E2QVF9,E2QVG1,E2QVP6,E2QW13,E2QWD3,E2QWE2,E2QWE3,E2QWF5,E2QWL1,E2QWM4,E2QWM5,E2QWM9,E2QWR3,E2QX86,E2QXD1,E2QXM7,E2QXN9,E2QXY7,E2QXZ2,E2QY07,E2QY08,E2QY30,E2QY31,E2QYN4,E2QYU2,E2QYZ4,E2QZ11,E2QZ50,E2QZN3,E2QZN8,E2QZV2,E…
biological_process	negative regulation of cytoskeleton organization	A0M8V0,E2QRV2,E2QW54,E2QWL1,E2QXA5,E2QZE7,E2R1C9,E2R413,E2RFV2,E2RGD3,E2RJW9,E2RNX1,E2RR96,F1P7P3,F1P9B2,F1PA22,F1PFK0,F1PQS3,F1PXT8,F1Q3Y0,F6X6W7,F6Y3P9,J9NV86,J9NVP2,J9P127,J9P1R0,Q863Z4
biological_process	barbed-end actin filament capping	A0M8V0,E2QZE7,E2R413,E2RGD3,E2RJW9,F1P7P3,F1PFK0,F1PQS3,F6Y3P9,J9P1R0,Q863Z4
biological_process	response to temperature stimulus	E2QTT8,E2QUU5,E2R0T6,E2R771,E2R7F3,E2RA27,E2RAU5,E2REJ7,E2RLQ9,E2RM67,E2RPH1,E2RPJ4,E2RQW2,F1PAT6,F1PGY1,F1PIC7,F1PIL5,F1PME4,F1PP91,F1Q1H3,F1Q462,F6UV28,G1K268,H9GW49,H9GWD1,J9NU25,J9P3K0,P05123,Q3YIX4
biological_process	negative regulation of protein complex disassembly	A0M8V0,E2QRV2,E2QW54,E2QWL1,E2QZE7,E2R1C9,E2R413,E2RGD3,E2RJW9,E2RNX1,F1P7P3,F1P9B2,F1PFK0,F1PQS3,F1PXT8,F6X6W7,F6Y3P9,J9P1R0,Q863Z4
biological_process	localization	A0A0A0MPC5,A0A140T8E2,A4GT58,B6V8E6,D3YJ60,E2QRX1,E2QS13,E2QS34,E2QSE3,E2QTC7,E2QTL3,E2QTN0,E2QTP7,E2QUQ0,E2QUR2,E2QUR8,E2QUU5,E2QUV3,E2QVP6,E2QW13,E2QW54,E2QW79,E2QWD1,E2QWD3,E2QWE3,E2QWF5,E2QWM4,E2QWM5,E2QWN7,E2QWR3,E2QWX5,E2QXA5,E2QXF2,E2QXY7,E2QY08,E2QY30,E2QY31,E2QYB6,E2QYG6,E2QYI2,E2QYN4,E2QYU2,E2QZ05,E2QZN8,E2QZV2,E2QZX1,E2R030,E2R057,E2R0D2,E2R0K8,E2R0L9,E2R0R3,E2R0S6,E2R0T6,E2R1M6,E2R1R4…
biological_process	positive regulation of organelle organization	B6V8E6,E2QRX1,E2QTL3,E2QUQ0,E2QWR3,E2QWU0,E2QXY7,E2QYN4,E2R0L9,E2R2N2,E2R2P0,E2R7V4,E2R912,E2RB79,E2RBV0,E2RCZ7,E2RD65,E2RD72,E2RIQ2,E2RLL6,E2RMT4,E2RTK7,F1P679,F1P6B7,F1P9B2,F1PA22,F1PAG6,F1PAY5,F1PBG7,F1PDJ5,F1PE53,F1PJ63,F1PLU5,F1PR93,F1PR95,F1PU58,F1PUT6,F1PWN6,F1PYQ1,F1Q2U8,F1Q331,F1Q3Y0,F1Q4K1,F6UTB0,F6UV28,F6V0D8,F6XY66,F6Y3P9,J9NTX8,J9NV86,J9NWK4,J9P019,J9P1J5,J9P2G7,J9P309,J9P3T9,J9P9Z6,…
biological_process	organic acid metabolic process	A0A0B4J194,A0A0B4J195,A0A2Z5XAD4,B6V8E6,E2QRQ8,E2QRR5,E2QU31,E2QU97,E2QUR2,E2QV08,E2QV97,E2QX53,E2QXI3,E2QXN9,E2QXS7,E2QZ13,E2QZ69,E2R1E3,E2R1S5,E2R311,E2R3N2,E2R431,E2R4D5,E2R4L7,E2R507,E2R543,E2R599,E2R5B9,E2R761,E2R7C2,E2R857,E2RA59,E2RAE2,E2RAM9,E2RDN1,E2REH5,E2RF46,E2RFC5,E2RFD0,E2RFL0,E2RGG9,E2RGR9,E2RH59,E2RHR7,E2RHW7,E2RKY4,E2RLB8,E2RLU9,E2RND5,E2RNL3,E2RNQ8,E2RNW5,E2RPJ4,E2RPN5,E2RS63,E2…
biological_process	response to stress	A1DZY5,A2SXS5,A6Q0K4,D3YJ60,E2QRQ8,E2QRV2,E2QRX1,E2QS13,E2QSE3,E2QT97,E2QTN0,E2QTT8,E2QUE7,E2QUK0,E2QUR2,E2QUR8,E2QUU5,E2QUV3,E2QV07,E2QWD3,E2QWE0,E2QXC6,E2QXD1,E2QXM7,E2QXN9,E2QXU4,E2QXY7,E2QY30,E2QY31,E2QYJ4,E2QYK6,E2QYU2,E2QYZ4,E2QZN8,E2QZV2,E2R0D2,E2R0D6,E2R0F2,E2R0I8,E2R0T6,E2R1E3,E2R1X9,E2R2N2,E2R3R2,E2R3V7,E2R412,E2R4A5,E2R4I1,E2R4J1,E2R4L7,E2R513,E2R5B9,E2R6L1,E2R755,E2R771,E2R792,E2R7F3,…
biological_process	viral reproductive process	E2QTC7,E2QZN8,E2R198,E2R3V7,E2R412,E2R6Q7,E2R9E3,E2RAT8,E2RGE0,E2RLQ9,E2RNT3,E2RPE3,E2RR01,E2RRB7,F1P9H9,F1PAM9,F1PGB6,F1PGV4,F1PHT0,F1PJ74,F1PL97,F1PSX9,F1PTL1,F1Q0H3,F1Q2U8,F6UT62,F6XEL1,F6Y3P9,J9NXZ3,J9P326,J9P7U8,J9PBB8,P18067,Q5WR10,Q9TSZ6
biological_process	regulation of peptidase activity	A1DZY5,E2QS13,E2QTL3,E2QUV3,E2QXA6,E2QXF2,E2R0S6,E2R4I1,E2R886,E2R912,E2RAA0,E2RC33,E2RGP2,E2RHY7,E2RKJ6,E2RKR4,E2RLQ9,E2RNB6,E2RNE1,E2RPY9,F1PBI6,F1PD77,F1PIV3,F1PQS2,F1PUI4,F1PUM6,F1PUN9,F1PYX9,F1Q1H3,F1Q4K1,F2Z4Q7,F6UY11,F6Y2H4,F6Y3P9,J9NRM1,J9NVT9,J9NXZ3,Q6YKA4,Q9TTY1
biological_process	negative regulation of catalytic activity	A2SXS5,E2QS13,E2QUV3,E2QWR3,E2QXA6,E2QYN4,E2QZV5,E2R0I8,E2R0S6,E2R0X9,E2R1M6,E2R2P0,E2R3J1,E2R7V4,E2R886,E2R912,E2RC33,E2RGG9,E2RGP2,E2RHY7,E2RI72,E2RKJ6,E2RM91,E2RNB6,E2RNE1,E2RQW2,E2RRC6,E2RRD1,F1P624,F1P6B7,F1P914,F1P9S0,F1PBI6,F1PBZ4,F1PD37,F1PDJ5,F1PE53,F1PIV3,F1PJ74,F1PKH2,F1PLK4,F1PQS2,F1PRR3,F1PU60,F1PUI4,F1PUM6,F1PYX9,F1Q1Q0,F2Z4Q7,F6V322,F6X8E7,F6XVD7,F6Y2H4,J9NRM1,J9NVT9,J9NXZ3,J9P332,…
biological_process	immune response	D7F604,E2QS13,E2QSE3,E2QTN0,E2QUR2,E2QWN7,E2QXY7,E2QY30,E2QYZ4,E2QZN3,E2QZN8,E2R0F2,E2R1M6,E2R2N2,E2R3V7,E2R412,E2R4A3,E2R4L7,E2R4Q2,E2R755,E2R9T6,E2RBJ1,E2RBR6,E2RCN3,E2RCY1,E2RD72,E2RF98,E2RFV8,E2RHN1,E2RM30,E2RN10,E2RPC0,E2RPD3,E2RPG3,E2RPS1,E2RS79,E2RSI6,E2RSM4,E2RSP4,E2RTK7,F1P679,F1P6B7,F1P6E1,F1P7F8,F1P7V2,F1P903,F1P9B2,F1PBI6,F1PCV4,F1PDJ5,F1PED7,F1PEH0,F1PJ74,F1PKH2,F1PKY3,F1PLS4,F1PNX1,…
biological_process	response to growth factor stimulus	A2SXS5,B6V8E6,E2QUV7,E2QWE3,E2QXF2,E2R0X9,E2R2N2,E2R7V4,E2RBU1,E2RBW8,E2RCF2,E2RF98,E2RFW4,E2RGD3,E2RMA3,E2RPB8,E2RQL3,E2RRN8,E2RSS4,E2RTE0,F1P6B7,F1P6C1,F1P7F8,F1PAY5,F1PB28,F1PBI6,F1PF03,F1PFB4,F1PHY1,F1PIA3,F1PIC7,F1PJ65,F1PKH2,F1PKR0,F1PLA1,F1PLR0,F1PM26,F1PPA1,F1PQC4,F1PQX4,F1PST8,F1PSX9,F1PU60,F1PUT6,F1PYE3,F1Q0B0,F1Q129,F1Q147,F1Q1H3,F1Q3J6,F1Q4K1,F6UV28,F6XLD3,F6XLF1,J9NRV4,J9NTX8,J9P2L4,…
biological_process	regulation of locomotion	E2QRX1,E2QS34,E2QWD3,E2QWR3,E2QXA5,E2QXF2,E2QZN8,E2QZV2,E2R0R3,E2R1M6,E2R2C3,E2R400,E2R755,E2R7F1,E2R7V4,E2R912,E2R9S7,E2RAA0,E2RAI8,E2RBU1,E2RF98,E2RFV8,E2RFW4,E2RGF3,E2RHN1,E2RJT2,E2RMA3,E2RPS0,E2RQ14,E2RRC6,E2RSP4,F1P6B7,F1P6C1,F1P9B2,F1P9E5,F1P9S5,F1P9Z4,F1PA22,F1PBI6,F1PCD8,F1PE38,F1PE53,F1PEQ5,F1PEZ5,F1PF03,F1PIC7,F1PJ74,F1PKH2,F1PKY3,F1PL90,F1PL97,F1PLR0,F1PLV6,F1PQS2,F1PQZ7,F1PR66,F1PR95,…
biological_process	regulation of endopeptidase activity	A1DZY5,E2QS13,E2QTL3,E2QUV3,E2QXA6,E2QXF2,E2R0S6,E2R4I1,E2R886,E2R912,E2RAA0,E2RC33,E2RGP2,E2RHY7,E2RKJ6,E2RKR4,E2RLQ9,E2RNB6,E2RNE1,E2RPY9,F1PBI6,F1PD77,F1PIV3,F1PQS2,F1PUI4,F1PUM6,F1PUN9,F1PYX9,F1Q1H3,F1Q4K1,F2Z4Q7,F6UY11,F6Y2H4,F6Y3P9,J9NRM1,J9NXZ3,Q6YKA4,Q9TTY1
biological_process	viral reproduction	E2QTC7,E2QZN8,E2R198,E2R3V7,E2R412,E2R6Q7,E2R9E3,E2RAT8,E2RGE0,E2RLQ9,E2RNT3,E2RPE3,E2RR01,E2RRB7,F1P9H9,F1PAM9,F1PGB6,F1PGV4,F1PHT0,F1PJ74,F1PL97,F1PSX9,F1PTL1,F1Q0H3,F1Q2U8,F6UT62,F6XEL1,F6Y3P9,J9NXZ3,J9P326,J9P7U8,J9PBB8,P18067,Q5WR10,Q9TSZ6
biological_process	Golgi vesicle transport	A0A0A0MPC5,E2QWX5,E2R446,E2R667,E2R812,E2R8C6,E2R8Y3,E2R9A2,E2RAT6,E2RB31,E2REI7,E2REP2,E2RH29,E2RHA6,E2RPG3,E2RPG9,E2RRB7,E2RSG8,E2RT72,F1PAM9,F1PDM3,F1PDY2,F1PFR1,F1PGG9,F1PID0,F1PLR0,F1PN76,F1PQ80,F1PRT4,F1PU58,F1PU93,F1Q043,F1Q0H3,F1Q1H3,F1Q260,F1Q330,J9JHK6,J9NRG5,J9NTN4,J9NYJ8,J9P0D5,J9P1Q5,J9P396,J9PAW7
biological_process	cardiovascular system development	A0A140T8E2,B6V8E6,D3YJ60,D5IGD0,E2QUK0,E2QUQ0,E2QWE3,E2QZV5,E2R027,E2R030,E2R0J2,E2R0R3,E2R198,E2R2N2,E2RAA0,E2RCF2,E2RCV4,E2RDB1,E2RF39,E2RF98,E2RGG9,E2RGI4,E2RGI5,E2RIV1,E2RJ14,E2RJE0,E2RMA3,E2RNC3,E2RNF2,E2RQA6,E2RR96,E2RRJ6,E2RT60,F1P6B7,F1P7Z9,F1P912,F1P9J3,F1PAY5,F1PBI6,F1PE38,F1PE53,F1PEC4,F1PGZ1,F1PHH3,F1PHX8,F1PHY1,F1PIA3,F1PJ74,F1PK29,F1PKH2,F1PLA1,F1PLK4,F1PM34,F1PMK7,F1PQC4,F1PQL2,F1P…
biological_process	circulatory system development	A0A140T8E2,B6V8E6,D3YJ60,D5IGD0,E2QUK0,E2QUQ0,E2QWE3,E2QZV5,E2R027,E2R030,E2R0J2,E2R0R3,E2R198,E2R2N2,E2RAA0,E2RCF2,E2RCV4,E2RDB1,E2RF39,E2RF98,E2RGG9,E2RGI4,E2RGI5,E2RIV1,E2RJ14,E2RJE0,E2RMA3,E2RNC3,E2RNF2,E2RQA6,E2RR96,E2RRJ6,E2RT60,F1P6B7,F1P7Z9,F1P912,F1P9J3,F1PAY5,F1PBI6,F1PE38,F1PE53,F1PEC4,F1PGZ1,F1PHH3,F1PHX8,F1PHY1,F1PIA3,F1PJ74,F1PK29,F1PKH2,F1PLA1,F1PLK4,F1PM34,F1PMK7,F1PQC4,F1PQL2,F1P…
biological_process	cellular component movement	B6V8E6,E2QS34,E2QTN0,E2QW54,E2QWD3,E2QWN7,E2QWR3,E2QXA5,E2QXF2,E2QXY7,E2QY08,E2QY30,E2QY31,E2QZV2,E2R030,E2R0R3,E2R0T6,E2R1M6,E2R2C3,E2R400,E2R498,E2R755,E2R7F1,E2R7V4,E2R912,E2R9S7,E2RA06,E2RAA0,E2RAI8,E2RBU1,E2RCF2,E2RCI8,E2RCV4,E2RD65,E2RD94,E2RDT0,E2RDU7,E2RF98,E2RFV8,E2RFW4,E2RG27,E2RGF3,E2RH71,E2RHN1,E2RIQ2,E2RJ14,E2RJF8,E2RJT2,E2RK00,E2RL77,E2RLP1,E2RM92,E2RMA3,E2RND5,E2RNF2,E2RPG9,E2RQ14,…
biological_process	locomotion	B6V8E6,E2QRX1,E2QS34,E2QW54,E2QWD3,E2QWN7,E2QWR3,E2QXA5,E2QXF2,E2QY30,E2QY31,E2QZN8,E2QZV2,E2R030,E2R0R3,E2R1M6,E2R1X9,E2R2C3,E2R400,E2R498,E2R4J1,E2R6Q7,E2R755,E2R7F1,E2R7V4,E2R912,E2R9S7,E2RA06,E2RAA0,E2RAI8,E2RAT8,E2RBU1,E2RCF2,E2RCI8,E2RCV4,E2RD65,E2RD94,E2RDU7,E2RF98,E2RFV8,E2RFW4,E2RGF3,E2RHN1,E2RIQ2,E2RJ14,E2RJT2,E2RL77,E2RMA3,E2RND5,E2RNF2,E2RPS0,E2RQ14,E2RR96,E2RRC6,E2RS94,E2RSP4,E2RT60,…
biological_process	carboxylic acid metabolic process	A0A0B4J194,A0A0B4J195,A0A2Z5XAD4,E2QRQ8,E2QRR5,E2QU31,E2QU97,E2QUR2,E2QV08,E2QV97,E2QX53,E2QXI3,E2QXN9,E2QXS7,E2QZ69,E2R1S5,E2R311,E2R3N2,E2R431,E2R4D5,E2R4L7,E2R507,E2R543,E2R599,E2R5B9,E2R761,E2R7C2,E2R857,E2RA59,E2RAE2,E2RDN1,E2REH5,E2RF46,E2RFC5,E2RFD0,E2RFL0,E2RGG9,E2RGR9,E2RH59,E2RHR7,E2RHW7,E2RKY4,E2RLB8,E2RLU9,E2RND5,E2RNL3,E2RNQ8,E2RNW5,E2RPJ4,E2RPN5,E2RS63,E2RSP4,E2RTJ7,E2RTL4,F1P6B7,F1…
biological_process	regulation of cellular component movement	E2QS34,E2QWD3,E2QWR3,E2QXA5,E2QXF2,E2QY08,E2QZV2,E2R0R3,E2R1M6,E2R2C3,E2R400,E2R755,E2R7F1,E2R7V4,E2R912,E2R9S7,E2RAA0,E2RAI8,E2RBU1,E2RF98,E2RFV8,E2RFW4,E2RGF3,E2RHN1,E2RJT2,E2RMA3,E2RNF2,E2RQ14,E2RRC6,E2RS94,E2RSP4,F1P6B7,F1P6C1,F1P9B2,F1P9E5,F1P9S5,F1P9Z4,F1PA22,F1PBI6,F1PCD8,F1PE38,F1PE53,F1PEQ5,F1PEZ5,F1PF03,F1PIC7,F1PJ74,F1PKH2,F1PKY3,F1PL90,F1PLR0,F1PLV6,F1PQM7,F1PQS2,F1PQZ7,F1PR66,F1PR95,…
biological_process	regulation of cell motility	E2QS34,E2QWD3,E2QWR3,E2QXA5,E2QXF2,E2QZV2,E2R0R3,E2R1M6,E2R2C3,E2R400,E2R755,E2R7F1,E2R7V4,E2R912,E2R9S7,E2RAA0,E2RAI8,E2RBU1,E2RF98,E2RFV8,E2RFW4,E2RGF3,E2RHN1,E2RJT2,E2RMA3,E2RQ14,E2RRC6,E2RSP4,F1P6B7,F1P6C1,F1P9B2,F1P9E5,F1P9S5,F1P9Z4,F1PA22,F1PBI6,F1PCD8,F1PE38,F1PE53,F1PEQ5,F1PEZ5,F1PF03,F1PIC7,F1PJ74,F1PKH2,F1PKY3,F1PL90,F1PLR0,F1PLV6,F1PQS2,F1PQZ7,F1PR66,F1PR95,F1PST8,F1PSX9,F1PUI4,F1PUM6,…
biological_process	regulation of endocytosis	E2QSE3,E2QTP7,E2QUV3,E2QYU2,E2QZN8,E2R030,E2RFW4,E2RN10,E2RRD2,E2RTI3,F1PDJ5,F1PE38,F1PFZ5,F1PGV4,F1PJ63,F1PJ74,F1PK00,F1PLR0,F1PM34,F1PN76,F1PQL2,F1PU60,F1PUI4,F1PUM6,F1Q2U8,F1Q462,F2Z4P5,F6PME1,F6UT62,F6V735,J9NZ03,J9P315,J9P396,Q6YKA4
biological_process	cytoplasmic translation	A0A0A0MPD2,D0VWQ3,E2QUE7,E2QWG8,E2QXF3,E2R149,E2R3D3,E2R9V0,E2RBM3,E2RCL4,E2REK3,E2RIA8,E2RKS4,E2RNT3,E2RSR5,F1PEL5,F1PGD7,F1PUX4,F1Q424,F6UN31,J9NSD0,J9NZX6,J9P0A6,J9P8U8,J9P9X7
biological_process	regulation of intracellular transport	A4GT58,E2QS13,E2QTL3,E2QUQ0,E2QWM5,E2QWN7,E2QYN4,E2R3V7,E2R4A3,E2R792,E2R7F1,E2R812,E2R9K4,E2RA27,E2REK6,E2RF06,E2RFW4,E2RNB6,E2RNT3,E2RRC6,E2RSI6,F1PAT6,F1PAY5,F1PB28,F1PEH0,F1PFR1,F1PGY9,F1PIL5,F1PLD5,F1PLR0,F1PNP7,F1PRL5,F1PSK6,F1PUM3,F1PUN9,F1PWW0,F1PZE5,F1Q147,F1Q3J6,F6UT62,F6UV28,F6XQD6,J9JHN1,J9NSF9,J9NZ28,J9P249,J9P4N7,J9P746,O02812,P62825
biological_process	cell migration	B6V8E6,E2QS34,E2QW54,E2QWD3,E2QWN7,E2QWR3,E2QXA5,E2QXF2,E2QY30,E2QY31,E2QZV2,E2R030,E2R0R3,E2R2C3,E2R400,E2R498,E2R755,E2R7F1,E2R7V4,E2R912,E2RA06,E2RAA0,E2RAI8,E2RBU1,E2RCF2,E2RCI8,E2RCV4,E2RD65,E2RD94,E2RDU7,E2RF98,E2RFV8,E2RFW4,E2RGF3,E2RHN1,E2RIQ2,E2RJ14,E2RJT2,E2RL77,E2RMA3,E2RND5,E2RR96,E2RRC6,E2RSP4,E2RT60,F1P6B7,F1P6H7,F1P9B2,F1P9E5,F1P9J3,F1P9Q2,F1P9S5,F1P9Z4,F1PA22,F1PBI6,F1PCD8,F1PDJ5,…
biological_process	positive regulation of cell adhesion	E2QSE3,E2QWD3,E2R7V4,E2R912,E2R9R1,E2RAA0,E2RCF2,E2REB0,E2RF98,E2RGR7,E2RLM4,E2RPD3,E2RPH7,F1PAG6,F1PDJ5,F1PE38,F1PK00,F1PKH2,F1PKX2,F1PR95,F1PST8,F1PSX9,F1PU60,F1PUM6,F1PV78,F1PWW0,F1PXK3,F1PYK5,F1PYQ1,F2Z4P5,J9P1H1,P60952,Q863H1
biological_process	protein stabilization	E2QS13,E2QSE3,E2QYU2,E2R0L9,E2R8A8,E2R9M1,E2RA27,E2RAG6,E2RB79,E2RCN3,E2RHN1,E2RLL6,E2RM43,E2RNB6,E2RNJ3,E2RTD3,F1P6C1,F1PA22,F1PDJ5,F1PGY1,F1PS57,F1PWW0,F1PX83,F1Q260,F1Q331,F1Q3Y0,F6V0D8,J9P4C5
biological_process	regulation of phosphorus metabolic process	A2SXS5,D3YJ60,E2QRV2,E2QS13,E2QSE3,E2QUV7,E2QW13,E2QWE3,E2QWJ6,E2QWM4,E2QWM5,E2QWR3,E2QXN9,E2QY31,E2QYN4,E2QZV5,E2R030,E2R0I8,E2R0X9,E2R2N2,E2R2P0,E2R3V7,E2R412,E2R498,E2R4L7,E2R4N9,E2R507,E2R5P4,E2R651,E2R6L1,E2R755,E2R792,E2R7V4,E2R8W7,E2R912,E2R9R1,E2RAA0,E2RAI8,E2RBU1,E2RCF2,E2RCH8,E2RCZ7,E2RD72,E2RDE0,E2REK6,E2RF39,E2RF98,E2RFC5,E2RFD6,E2RFW4,E2RGF3,E2RGG9,E2RI72,E2RJT2,E2RK00,E2RKY4,E2RLB7,…
biological_process	positive regulation of cytoskeleton organization	E2QUQ0,E2QWR3,E2QWU0,E2QXY7,E2R2P0,E2R7V4,E2R912,E2RD65,E2RD72,E2RIQ2,E2RMT4,F1P679,F1P9B2,F1PA22,F1PAG6,F1PBG7,F1PDJ5,F1PE53,F1PJ63,F1PLU5,F1PR93,F1PUT6,F1PYQ1,F1Q3Y0,F6XY66,F6Y3P9,J9NTX8,J9NV86,J9NWK4,J9P1J5,J9P2G7,J9P309,J9P9Z6
biological_process	organic substance transport	A4GT58,D3YJ60,E2QRX1,E2QS13,E2QSE3,E2QTC7,E2QTL3,E2QTP7,E2QUR2,E2QUU5,E2QVP6,E2QW13,E2QW54,E2QW79,E2QWE3,E2QWM5,E2QWN7,E2QY31,E2QYB6,E2QYU2,E2QZX1,E2R057,E2R0D2,E2R0K8,E2R0L9,E2R236,E2R2C3,E2R2G5,E2R2P0,E2R3V7,E2R4A3,E2R4I1,E2R4Q2,E2R507,E2R651,E2R667,E2R792,E2R812,E2R832,E2R8A2,E2R8C6,E2R912,E2R9A2,E2R9K4,E2R9P2,E2RA27,E2RAE6,E2RAT6,E2RAT8,E2RAU5,E2RAZ6,E2RB34,E2RDX0,E2RE87,E2REK5,E2RF06,E2RFH1,…
biological_process	cell motility	B6V8E6,E2QS34,E2QW54,E2QWD3,E2QWN7,E2QWR3,E2QXA5,E2QXF2,E2QY30,E2QY31,E2QZV2,E2R030,E2R0R3,E2R1M6,E2R2C3,E2R400,E2R498,E2R755,E2R7F1,E2R7V4,E2R912,E2R9S7,E2RA06,E2RAA0,E2RAI8,E2RBU1,E2RCF2,E2RCI8,E2RCV4,E2RD65,E2RD94,E2RDU7,E2RF98,E2RFV8,E2RFW4,E2RGF3,E2RHN1,E2RIQ2,E2RJ14,E2RJT2,E2RL77,E2RMA3,E2RND5,E2RNF2,E2RQ14,E2RR96,E2RRC6,E2RS94,E2RSP4,E2RT60,F1P6B7,F1P6C1,F1P6H7,F1P9B2,F1P9E5,F1P9J3,F1P9Q2,…
biological_process	localization of cell	B6V8E6,E2QS34,E2QW54,E2QWD3,E2QWN7,E2QWR3,E2QXA5,E2QXF2,E2QY30,E2QY31,E2QZV2,E2R030,E2R0R3,E2R1M6,E2R2C3,E2R400,E2R498,E2R755,E2R7F1,E2R7V4,E2R912,E2R9S7,E2RA06,E2RAA0,E2RAI8,E2RBU1,E2RCF2,E2RCI8,E2RCV4,E2RD65,E2RD94,E2RDU7,E2RF98,E2RFV8,E2RFW4,E2RGF3,E2RHN1,E2RIQ2,E2RJ14,E2RJT2,E2RL77,E2RMA3,E2RND5,E2RNF2,E2RQ14,E2RR96,E2RRC6,E2RS94,E2RSP4,E2RT60,F1P6B7,F1P6C1,F1P6H7,F1P9B2,F1P9E5,F1P9J3,F1P9Q2,…
biological_process	multi-organism cellular process	E2QTC7,E2QZN8,E2R198,E2R3V7,E2R412,E2R6Q7,E2R9E3,E2RAT8,E2RGE0,E2RLQ9,E2RNT3,E2RPE3,E2RR01,E2RRB7,F1P9H9,F1PAM9,F1PGB6,F1PGV4,F1PHT0,F1PJ74,F1PL97,F1PSX9,F1PTL1,F1Q0H3,F1Q2U8,F6UT62,F6XEL1,F6Y3P9,J9NXZ3,J9P326,J9P7U8,J9PBB8,P18067,Q5WR10,Q9TSZ6
biological_process	regulation of proteasomal ubiquitin-dependent protein catabolic process	E2QS13,E2QWM9,E2QYU2,E2QZB3,E2QZV2,E2R0I8,E2R4A5,E2RAG6,E2REF0,E2RFW4,E2RKJ1,E2RLQ9,E2RPJ4,E2RQA6,E2RTD3,F1P9P5,F1PLR0,F1PTL1,F1PX83,F1Q330,G1K268,J9NRV4,J9NVT9
biological_process	actin filament bundle assembly	E2QW54,E2QWN7,E2QY07,E2QY08,E2QZE7,E2R7V4,E2R912,E2RJW9,E2RR96,E2RRC6,E2RSI6,F1P7F8,F1P9B2,F1PA22,F1PDJ5,F1PE53,F1PU58,F1PU60,F1PUT6,F1PYQ1,F1PYU3,F1Q3Y0,F1Q3Y2,F6V234,F6XY66,J9NTX8,J9NVP2,J9P1R0
biological_process	positive regulation of transport	E2QRX1,E2QS13,E2QSE3,E2QTC7,E2QTL3,E2QTN0,E2QUQ0,E2QUV3,E2QWD1,E2QWM5,E2QYU2,E2QZN8,E2R030,E2R1Z0,E2R2C3,E2R3V7,E2R792,E2R7F1,E2RA27,E2RD72,E2REK6,E2RF06,E2RFW4,E2RN10,E2RNT3,E2RNW6,E2RPG3,E2RRC6,E2RRD2,E2RSI6,E2RSP4,F1P6B7,F1PAT6,F1PAY5,F1PB28,F1PDJ5,F1PEH0,F1PFZ5,F1PGV4,F1PGY9,F1PIL5,F1PJ74,F1PK00,F1PKH2,F1PL90,F1PLD5,F1PLR0,F1PM34,F1PN76,F1PNP7,F1PSK6,F1PUI4,F1PUM3,F1PUM6,F1PUN9,F1PVV7,F1PWW0,…
biological_process	regulation of protein stability	E2QRX1,E2QS13,E2QSE3,E2QYU2,E2R0L9,E2R0T6,E2R792,E2R8A8,E2R9M1,E2RA27,E2RAG6,E2RB79,E2RCN3,E2RHN1,E2RKJ1,E2RLL6,E2RM43,E2RNB6,E2RNJ3,E2RTD3,F1P6C1,F1P9I9,F1PA22,F1PDJ5,F1PGY1,F1PS57,F1PTL1,F1PU58,F1PV82,F1PWW0,F1PX83,F1Q260,F1Q331,F1Q3Y0,F6V0D8,F6Y3P9,J9NRV4,J9P4C5
biological_process	cell death	A1DZY5,A6Q0K4,B6V8E6,E2QRQ8,E2QRV2,E2QRX1,E2QS13,E2QTC7,E2QTL3,E2QUU5,E2QW13,E2QWE0,E2QXA6,E2QXF2,E2QXM7,E2QY30,E2QYN4,E2QYU2,E2R027,E2R030,E2R0I8,E2R0L9,E2R0V0,E2R1V2,E2R2P0,E2R412,E2R4I1,E2R543,E2R5P4,E2R8C0,E2R912,E2R9E3,E2R9S7,E2RA06,E2RA27,E2RAA0,E2RC33,E2RCI8,E2RD94,E2RDX1,E2RE67,E2RF46,E2RF98,E2RFF1,E2RFI6,E2RFW4,E2RGF3,E2RH47,E2RHB3,E2RHN1,E2RIQ2,E2RJ75,E2RJE0,E2RKJ1,E2RL17,E2RLQ9,E2RNB6,…
biological_process	death	A1DZY5,A6Q0K4,B6V8E6,E2QRQ8,E2QRV2,E2QRX1,E2QS13,E2QTC7,E2QTL3,E2QUU5,E2QW13,E2QWE0,E2QXA6,E2QXF2,E2QXM7,E2QY30,E2QYN4,E2QYU2,E2R027,E2R030,E2R0I8,E2R0L9,E2R0V0,E2R1V2,E2R2P0,E2R412,E2R4I1,E2R543,E2R5P4,E2R8C0,E2R912,E2R9E3,E2R9S7,E2RA06,E2RA27,E2RAA0,E2RC33,E2RCI8,E2RD94,E2RDX1,E2RE67,E2RF46,E2RF98,E2RFF1,E2RFI6,E2RFW4,E2RGF3,E2RH47,E2RHB3,E2RHN1,E2RIQ2,E2RJ75,E2RJE0,E2RKJ1,E2RL17,E2RLQ9,E2RNB6,…
biological_process	negative regulation of response to stimulus	A0A140T8E2,A2SXS5,B6V8E6,E2QRQ8,E2QRX1,E2QUV7,E2QVG1,E2QWD3,E2QWE3,E2QXF2,E2QXM7,E2QY30,E2QY31,E2R030,E2R0I8,E2R0R3,E2R0X9,E2R1M6,E2R2P0,E2R400,E2R792,E2R990,E2R9F0,E2R9S7,E2RA06,E2RAN6,E2RBR6,E2RBU1,E2RBW8,E2RC33,E2RCF2,E2RD72,E2RF76,E2RFW4,E2RGF3,E2RH70,E2RHN1,E2RIQ2,E2RL11,E2RLM4,E2RM11,E2RM91,E2RN45,E2RNY3,E2RPC0,E2RPJ4,E2RPS1,E2RPY9,E2RRN8,E2RSI6,E2RSS4,E2RT60,E2RTE0,F1P6C1,F1P7D3,F1PAT6,F1P…
biological_process	regulation of phosphate metabolic process	A2SXS5,D3YJ60,E2QRV2,E2QS13,E2QSE3,E2QUV7,E2QW13,E2QWE3,E2QWJ6,E2QWM4,E2QWM5,E2QWR3,E2QXN9,E2QY31,E2QYN4,E2QZV5,E2R030,E2R0I8,E2R0X9,E2R2N2,E2R2P0,E2R3V7,E2R412,E2R498,E2R4L7,E2R4N9,E2R507,E2R5P4,E2R651,E2R6L1,E2R755,E2R792,E2R7V4,E2R8W7,E2R912,E2R9R1,E2RAA0,E2RAI8,E2RBU1,E2RCF2,E2RCH8,E2RCZ7,E2RD72,E2RDE0,E2REK6,E2RF39,E2RF98,E2RFC5,E2RFD6,E2RFW4,E2RGF3,E2RGG9,E2RI72,E2RJT2,E2RK00,E2RKY4,E2RLB7,…
biological_process	positive regulation of protein metabolic process	B6V8E6,D3YJ60,E2QRV2,E2QS13,E2QSE3,E2QUE7,E2QUV7,E2QVF9,E2QW13,E2QWM5,E2QXM7,E2QYU2,E2QZB3,E2QZV2,E2R030,E2R0I8,E2R0J2,E2R1J6,E2R1S5,E2R2N2,E2R3V7,E2R498,E2R5P4,E2R5Q5,E2R6L1,E2R755,E2R771,E2R792,E2R7V4,E2R8R8,E2R8W7,E2R8Y3,E2R9E3,E2RAA0,E2RAI8,E2RBV0,E2RD72,E2RDE0,E2RDZ4,E2REK3,E2RF98,E2RFC5,E2RFW4,E2RHY8,E2RIX2,E2RLQ9,E2RNT3,E2RPC0,E2RPE3,E2RPH1,E2RPJ4,E2RQ04,E2RQA6,E2RQL3,E2RSP4,F1P6C1,F1P774,…
biological_process	nuclear export	E2QS13,E2QWM5,E2R1S5,E2R4A3,E2R9K4,E2RA27,E2RAU5,E2RB34,E2RH09,E2RNT3,E2RPH1,E2RTB1,F1P8H7,F1PAT6,F1PLD5,F1PUN9,F1PVE3,F1Q1K6,F1Q3J6,F2Z4N6,F6UV28,F6X725,F6XEL1,J9NZ28,J9NZ53,J9P2A6,J9P851,P62825,Q5WR10
biological_process	cell morphogenesis involved in differentiation	A0A140T8E0,B6V8E6,E2QSB9,E2QSE3,E2QWD3,E2QWM4,E2QWR3,E2QY08,E2QY31,E2QYZ4,E2R030,E2R0F2,E2R0R3,E2R1X9,E2R400,E2R4J1,E2R7J9,E2R7K6,E2RBD1,E2RBU1,E2RCV4,E2RDX1,E2RF98,E2RFW4,E2RGD3,E2RGF3,E2RJ14,E2RLF1,E2RPE3,E2RRN8,E2RT60,E2RT85,E2RTE0,E2RTL4,F1P6H7,F1P6U6,F1P9J3,F1P9S5,F1P9U4,F1PAG6,F1PAY5,F1PB05,F1PCD8,F1PDJ5,F1PDR0,F1PEA6,F1PEC4,F1PFB4,F1PFM6,F1PGD7,F1PGV4,F1PHK9,F1PKH2,F1PLV6,F1PN67,F1PQL2,F1P…
biological_process	tRNA metabolic process	E2QRQ8,E2QRR5,E2QU31,E2QUE2,E2QUR2,E2QV97,E2QXI3,E2QZ69,E2R4D5,E2RA59,E2RBF4,E2RCD6,E2RGG9,E2RGM1,E2RH09,E2RHR7,E2RHW7,E2RLB7,E2RNQ8,E2RSP4,E2RTJ7,F1P7C2,F1PFD8,F1PLJ9,F1PU34,F1PZP6,F1Q1N7,F1Q332,F6V659,F6XPR6,F6XQ20
biological_process	negative regulation of hydrolase activity	E2QS13,E2QUV3,E2QWR3,E2QXA6,E2QYN4,E2R0S6,E2R7V4,E2R886,E2RC33,E2RGP2,E2RHY7,E2RI72,E2RKJ6,E2RNB6,E2RNE1,E2RRC6,F1P6B7,F1P9S0,F1PBI6,F1PD37,F1PDJ5,F1PE53,F1PIV3,F1PKH2,F1PLK4,F1PQS2,F1PU60,F1PUI4,F1PUM6,F1PYX9,F2Z4Q7,F6X8E7,F6Y2H4,J9NRM1,J9NVT9,J9NXZ3,J9P332,Q9TTY1
biological_process	protein localization to organelle	E2QRX1,E2QS13,E2QTL3,E2QUU5,E2QWE3,E2QWR3,E2QZ05,E2QZX1,E2R236,E2R2G5,E2R2P0,E2R3V7,E2R580,E2R792,E2R832,E2R9K4,E2R9M1,E2RA27,E2RAZ6,E2RB34,E2RCZ7,E2RDE0,E2REK5,E2RF06,E2RFI6,E2RFW4,E2RND5,E2RRW0,E2RSX0,E2RT63,F1P6C1,F1PAY5,F1PB28,F1PCV7,F1PER7,F1PFK6,F1PFR1,F1PGG9,F1PIC7,F1PQQ3,F1PS41,F1PUU5,F1PWW0,F1PZE5,F1PZL7,F1PZP6,F1Q0Z5,F1Q260,F1Q3I5,F2Z4P5,F6UV28,F6UV54,F6V322,F6V735,F6V7F8,F6X4J2,F6X637,…
biological_process	regulation of cell migration	E2QS34,E2QWD3,E2QWR3,E2QXA5,E2QXF2,E2QZV2,E2R0R3,E2R2C3,E2R400,E2R755,E2R7F1,E2R7V4,E2R912,E2RAA0,E2RAI8,E2RBU1,E2RF98,E2RFV8,E2RFW4,E2RGF3,E2RHN1,E2RJT2,E2RMA3,E2RRC6,E2RSP4,F1P6B7,F1P9B2,F1P9E5,F1P9S5,F1P9Z4,F1PA22,F1PBI6,F1PCD8,F1PE38,F1PE53,F1PEQ5,F1PEZ5,F1PF03,F1PIC7,F1PJ74,F1PKH2,F1PKY3,F1PL90,F1PLR0,F1PQS2,F1PQZ7,F1PR66,F1PR95,F1PST8,F1PSX9,F1PUI4,F1PUM6,F1PWK3,F1PWW0,F1PYE3,F1PYK5,F1PYQ1,…
biological_process	sensory perception of chemical stimulus	E2RMY4,E2RTD3
biological_process	cellular response to growth factor stimulus	A2SXS5,B6V8E6,E2QUV7,E2QWE3,E2QXF2,E2R0X9,E2R7V4,E2RBU1,E2RBW8,E2RCF2,E2RF98,E2RFW4,E2RGD3,E2RMA3,E2RPB8,E2RQL3,E2RRN8,E2RSS4,E2RTE0,F1P6B7,F1P6C1,F1P7F8,F1PAY5,F1PB28,F1PBI6,F1PF03,F1PFB4,F1PHY1,F1PIA3,F1PIC7,F1PJ65,F1PKH2,F1PKR0,F1PLA1,F1PLR0,F1PM26,F1PPA1,F1PQC4,F1PQX4,F1PST8,F1PSX9,F1PUT6,F1PYE3,F1Q0B0,F1Q129,F1Q147,F1Q1H3,F1Q3J6,F1Q4K1,F6XLD3,J9NRV4,J9NTX8,J9P2L4,J9P3K0,O02812,Q29393,Q32KH1,…
biological_process	response to endogenous stimulus	A0A0B4J195,A2SXS5,B6V8E6,E2QUH1,E2QUR2,E2QUV7,E2QV07,E2QXN9,E2QY30,E2R1S5,E2R2K4,E2R2N2,E2R5B9,E2R6Q7,E2R755,E2R7F1,E2R7V4,E2R9S7,E2RBU1,E2RBW8,E2RCF2,E2REF0,E2RF06,E2RF98,E2RFW4,E2RL11,E2RNE1,E2RPB8,E2RPJ4,E2RQ14,E2RQL3,E2RRC6,E2RRN8,E2RSI6,E2RSS4,E2RT60,E2RTD3,E2RTE0,F1P6B7,F1P6C1,F1P7F8,F1P7V2,F1P8N6,F1P9H9,F1PAT6,F1PAY5,F1PB28,F1PBI6,F1PCV7,F1PE38,F1PE53,F1PEM7,F1PEQ5,F1PF03,F1PFB4,F1PFM6,F1P…
biological_process	peptide metabolic process	E2QX69,E2QYU2,E2R097,E2R2V4,E2R599,E2R5B9,E2R7E8,E2RFL0,E2RPJ4,F1P7D3,F1P7M0,F1PE53,F1PGL5,F1PY20,F1PZA1,F1Q462,F1Q4G4,F6Y290,H9GW59,J9NUJ7,J9PBB8,P79143,Q5JZQ9,Z4YHH2
biological_process	cellular response to heat	E2QTT8,E2R0T6,E2RA27,E2RAU5,E2RLQ9,E2RM67,E2RPH1,E2RQW2,F1PAT6,F1PGY1,F1PIC7,F1Q1H3,F6UV28,G1K268,H9GW49,J9NU25,J9P3K0
biological_process	system development	A0A0A0MPC5,A0A140T8E0,A0A140T8E2,B6V8E6,D3YJ60,D5IGD0,E2QRQ8,E2QRX1,E2QSB9,E2QSE3,E2QUK0,E2QUQ0,E2QUV3,E2QUV7,E2QVF9,E2QVP6,E2QW13,E2QWD3,E2QWE3,E2QWF5,E2QWL1,E2QWM4,E2QWM5,E2QWM9,E2QX86,E2QXM7,E2QXN9,E2QXZ2,E2QY07,E2QY08,E2QY30,E2QY31,E2QYN4,E2QYU2,E2QYZ4,E2QZ11,E2QZN3,E2QZN8,E2QZV2,E2QZV5,E2R027,E2R030,E2R0F2,E2R0J2,E2R0R3,E2R0Z6,E2R198,E2R1E3,E2R1I9,E2R1S5,E2R1V2,E2R1X9,E2R2N2,E2R400,E2R498,E2…
biological_process	cell junction organization	B6V8E6,E2QSE3,E2QUQ0,E2QWR3,E2QY08,E2R030,E2R2K4,E2R912,E2R9S7,E2RD72,E2RKQ1,E2RL77,F1P6H7,F1P6U6,F1PAT6,F1PE38,F1PEC4,F1PFB4,F1PHK9,F1PHS5,F1PKH2,F1PQM7,F1PR93,F1PSC2,F1PU60,F1PY05,F1PYQ1,F1PYU3,F1Q147,F1Q1Q0,F6XY66,J9P0W8,J9P4F3,J9PAW7,O97758,P60952
biological_process	negative regulation of peptidase activity	E2QS13,E2QUV3,E2QXA6,E2R0S6,E2R886,E2RC33,E2RGP2,E2RHY7,E2RKJ6,E2RNB6,E2RNE1,F1PBI6,F1PIV3,F1PQS2,F1PUI4,F1PUM6,F1PYX9,F2Z4Q7,F6Y2H4,J9NRM1,J9NVT9,J9NXZ3,Q9TTY1
biological_process	positive regulation of endocytosis	E2QSE3,E2QUV3,E2QYU2,E2QZN8,E2R030,E2RFW4,E2RN10,E2RRD2,F1PDJ5,F1PFZ5,F1PGV4,F1PJ74,F1PK00,F1PM34,F1PN76,F1PUI4,F1PUM6,F1Q2U8,F1Q462,F2Z4P5,F6V735,J9P315,J9P396
biological_process	blood vessel morphogenesis	A0A140T8E2,B6V8E6,D3YJ60,D5IGD0,E2QUK0,E2QWE3,E2R030,E2R0J2,E2R198,E2RAA0,E2RCF2,E2RCV4,E2RF39,E2RGG9,E2RGI4,E2RJ14,E2RJE0,E2RMA3,E2RR96,E2RT60,F1P6B7,F1P7Z9,F1P9J3,F1PBI6,F1PE38,F1PE53,F1PEC4,F1PGZ1,F1PJ74,F1PK29,F1PKH2,F1PLK4,F1PQC4,F1PQZ7,F1PST8,F1PSX9,F1PTF8,F1PU60,F1PUI4,F1PVL7,F1PWK3,F1PWM7,F1PYE3,F1PZ83,F1Q0B0,F1Q129,F1Q133,F1Q1H3,F2Z4Q7,F6X8E7,F6XY66,J9NTX8,J9NV14,J9NZK5,J9P4N7,J9P530,J9P…
biological_process	substrate adhesion-dependent cell spreading	E2QWD3,E2QWR3,E2RF98,F1P6H7,F1PAG6,F1PCD8,F1PDJ5,F1PFB4,F1PGV4,F1PHK9,F1PLV6,F1PR95,F1PWW0,F1PYQ1,F1Q0H3,F1Q1Q0,J9NV14,P60952
biological_process	ATP synthesis coupled proton transport	F1PDB4
biological_process	energy coupled proton transport, down electrochemical gradient	F1PDB4
biological_process	negative regulation of signal transduction	A0A140T8E2,A2SXS5,B6V8E6,E2QRQ8,E2QUV7,E2QVG1,E2QWE3,E2QXF2,E2QXM7,E2QY30,E2QY31,E2R030,E2R0I8,E2R0X9,E2R1M6,E2R2P0,E2R792,E2R990,E2R9F0,E2R9S7,E2RA06,E2RAN6,E2RBU1,E2RBW8,E2RC33,E2RCF2,E2RD72,E2RF76,E2RFW4,E2RGF3,E2RH70,E2RIQ2,E2RL11,E2RM91,E2RN45,E2RNY3,E2RPC0,E2RPJ4,E2RPY9,E2RRN8,E2RSI6,E2RSS4,E2RT60,E2RTE0,F1P6C1,F1P7D3,F1PAT6,F1PAY5,F1PB05,F1PBI6,F1PCF0,F1PCG4,F1PDJ5,F1PEC4,F1PEQ5,F1PIA3,F1P…
biological_process	regulation of transport	A4GT58,B6V8E6,E2QRX1,E2QS13,E2QSE3,E2QTC7,E2QTL3,E2QTN0,E2QTP7,E2QUQ0,E2QUR8,E2QUV3,E2QW13,E2QWD1,E2QWM4,E2QWM5,E2QWN7,E2QYN4,E2QYU2,E2QZN8,E2R030,E2R057,E2R0D2,E2R1Z0,E2R2C3,E2R2K4,E2R3V7,E2R4A3,E2R4I1,E2R792,E2R7F1,E2R812,E2R912,E2R9K4,E2RA27,E2RAI8,E2RAT8,E2RD72,E2RE87,E2REK6,E2RF06,E2RFW4,E2RGF3,E2RGI4,E2RKR1,E2RN10,E2RNB6,E2RNT3,E2RNW6,E2RPC0,E2RPG3,E2RQE7,E2RRC6,E2RRD2,E2RSI6,E2RSP4,E2RSU6,…
biological_process	cell morphogenesis	A0A140T8E0,B6V8E6,E2QSB9,E2QSE3,E2QWD3,E2QWE2,E2QWM4,E2QWR3,E2QXD1,E2QXY7,E2QXZ2,E2QY08,E2QY31,E2QYU2,E2QYZ4,E2QZ50,E2R030,E2R0F2,E2R0R3,E2R1X9,E2R400,E2R498,E2R4J1,E2R4N9,E2R7F1,E2R7J9,E2R7K6,E2RBD1,E2RBU1,E2RCV4,E2RD72,E2RDX1,E2RF98,E2RFW4,E2RGD3,E2RGF3,E2RH53,E2RIL1,E2RJ14,E2RJW9,E2RK00,E2RLF1,E2RMA3,E2RPE3,E2RR96,E2RRC6,E2RRN8,E2RSI6,E2RT60,E2RT85,E2RTE0,E2RTL4,F1P679,F1P6B7,F1P6H7,F1P6U6,F1P…
biological_process	receptor-mediated endocytosis	A0A140T8E2,E2QSE3,E2QYU2,E2R030,E2RFW4,E2RN10,E2RNC3,E2RPI9,E2RRD2,E2RSI6,E2RT60,E2RTI3,F1PAM9,F1PB24,F1PBG7,F1PDT7,F1PGG9,F1PHQ0,F1PJ74,F1PPW5,F1PQL2,F1PQM7,F1PUI4,F1PUM6,F1Q2U8,F6X5M3,H9GW54,J9NWS6,J9P9Z6
biological_process	negative regulation of cell communication	A0A140T8E2,A2SXS5,B6V8E6,E2QRQ8,E2QUV7,E2QVG1,E2QWE3,E2QXF2,E2QXM7,E2QY30,E2QY31,E2R030,E2R0I8,E2R0X9,E2R1M6,E2R2P0,E2R792,E2R990,E2R9F0,E2R9S7,E2RA06,E2RAN6,E2RBU1,E2RBW8,E2RC33,E2RCF2,E2RD72,E2RF76,E2RFW4,E2RGF3,E2RH70,E2RIQ2,E2RL11,E2RM91,E2RN45,E2RNY3,E2RPC0,E2RPJ4,E2RPY9,E2RRN8,E2RSI6,E2RSS4,E2RT60,E2RTE0,F1P6C1,F1P7D3,F1PAT6,F1PAY5,F1PB05,F1PBI6,F1PCF0,F1PCG4,F1PDJ5,F1PEC4,F1PEQ5,F1PIA3,F1P…
biological_process	positive regulation of protein complex assembly	B6V8E6,E2QWN7,E2QWU0,E2QXY7,E2QYU2,E2R7F1,E2R7V4,E2RD65,E2RD72,E2RGG9,E2RH47,E2RIQ2,E2RLQ9,E2RMT4,F1P679,F1PA22,F1PAG6,F1PBG7,F1PJ63,F1PLR0,F1PYQ1,F1PYU3,F1Q3Y0,F6XCS5,F6XY66,F6Y016,F6Y3P9,J9NRV4,J9NV86,J9NWK4,J9P249,J9P309,J9P9Z6
biological_process	positive regulation of intracellular transport	E2QTL3,E2QUQ0,E2QWM5,E2R3V7,E2R792,E2R7F1,E2RA27,E2RF06,E2RFW4,E2RNT3,E2RRC6,E2RSI6,F1PAT6,F1PAY5,F1PB28,F1PEH0,F1PGY9,F1PIL5,F1PLD5,F1PLR0,F1PNP7,F1PSK6,F1PUN9,F1PWW0,F1Q147,F6UV28,J9NSF9,J9P746,O02812,P62825
biological_process	regulation of cell morphogenesis	A0A140T8E0,B6V8E6,E2QSB9,E2QWD3,E2QWR3,E2QXD1,E2QY31,E2R030,E2R0R3,E2R400,E2R498,E2R4N9,E2R7F1,E2RBU1,E2RCV4,E2RD72,E2RF98,E2RFW4,E2RGD3,E2RGF3,E2RIL1,E2RMA3,E2RPE3,E2RRC6,E2RRN8,E2RSI6,E2RTE0,F1P6B7,F1P6H7,F1P912,F1P9J3,F1P9Q2,F1P9S5,F1P9U4,F1PAG6,F1PAY5,F1PDJ5,F1PEC4,F1PKH2,F1PLV6,F1PR93,F1PR95,F1PV82,F1PVV7,F1PWW0,F1PYQ1,F1PZE5,F1Q1Q0,F1Q2U8,F1Q3I5,F2Z4P5,F6XQD6,F6XY66,J9NSF9,J9NTM8,J9NWK4,J9N…
biological_process	multicellular organismal development	A0A0A0MPC5,A0A0A0MPD0,A0A140T8E0,A0A140T8E2,A6Q0K4,B6V8E6,D3YJ60,D5IGD0,E2QRQ8,E2QRX1,E2QSB9,E2QSE3,E2QTT8,E2QUK0,E2QUQ0,E2QUV3,E2QUV7,E2QVF9,E2QVG1,E2QVP6,E2QW13,E2QWD3,E2QWE3,E2QWF5,E2QWL1,E2QWM4,E2QWM5,E2QWM9,E2QX86,E2QXM7,E2QXN9,E2QXZ2,E2QY07,E2QY08,E2QY30,E2QY31,E2QYN4,E2QYU2,E2QYZ4,E2QZ11,E2QZN3,E2QZN8,E2QZV2,E2QZV5,E2R027,E2R030,E2R0F2,E2R0J2,E2R0R3,E2R0Z6,E2R198,E2R1E3,E2R1I9,E2R1S5,E2R1V…
biological_process	ameboidal cell migration	E2QWR3,E2QXF2,E2QY31,E2R030,E2R0R3,E2R2C3,E2R400,E2R7V4,E2R912,E2RA06,E2RBU1,E2RCI8,E2RCV4,E2RD94,E2RJ14,E2RL77,E2RMA3,E2RR96,E2RT60,F1P6B7,F1P6H7,F1P9J3,F1PA22,F1PBI6,F1PDJ5,F1PE38,F1PE53,F1PJ74,F1PKH2,F1PQS2,F1PQZ7,F1PR95,F1PRF8,F1PST8,F1PSX9,F1PUT6,F1PWK3,F1PYE3,F1Q1H3,F1Q1Q0,F1Q3Y0,F6X8E7,F6XY66,J9NZ79,J9P4N7,P62490,Q06220,Q29393,Q6YKA4
biological_process	protein import	E2QUU5,E2QYU2,E2QZX1,E2R236,E2R2P0,E2R3V7,E2R792,E2RA27,E2RAZ6,E2RB34,E2REK5,E2RF06,E2RFI6,E2RFW4,E2RND5,E2RT63,F1PAY5,F1PB28,F1PFK6,F1PJ74,F1PS41,F1PWW0,F1PZL7,F2Z4P5,F6UV28,F6UV54,F6X4J2,F6X637,J9NST3,J9P249,J9P4N7,J9P558,J9PAW2,O02812,P62825
biological_process	cell-substrate junction assembly	E2QUQ0,E2QWR3,E2QY08,E2R030,E2R912,E2RL77,F1P6H7,F1PFB4,F1PHK9,F1PHS5,F1PSC2,F1PU60,F1PY05,F1PYQ1,F1Q1Q0,J9P0W8,J9PAW7
biological_process	nicotinamide nucleotide metabolic process	A0A0A0MPD3,E2QUI9,E2QV08,E2R0I9,E2RLQ6,E2RLQ9,E2RT65,F1P6K2,F1PE09,F1PQM1,F1PZA1,F6V404,H9GW87,J9NU72,J9NZX7
biological_process	pyridine nucleotide metabolic process	A0A0A0MPD3,E2QUI9,E2QV08,E2R0I9,E2RLQ6,E2RLQ9,E2RT65,F1P6K2,F1PE09,F1PQM1,F1PZA1,F6V404,H9GW87,J9NU72,J9NZX7
biological_process	protein localization to nucleus	E2QS13,E2QZX1,E2R2P0,E2R3V7,E2R792,E2R9K4,E2RA27,E2RB34,E2REK5,E2RF06,E2RFW4,E2RRW0,F1P6C1,F1PAY5,F1PB28,F1PER7,F1PFK6,F1PS41,F1PUU5,F1PWW0,F1PZL7,F1Q3I5,F2Z4P5,F6UV28,F6UV54,F6V322,F6V735,F6X4J2,F6X637,J9NSF9,J9NST3,J9P249,J9P4N7,J9P558,J9PAW2,O02812,P62825
biological_process	negative regulation of cellular response to growth factor stimulus	E2QWE3,E2RBU1,E2RBW8,E2RCF2,E2RRN8,E2RSS4,E2RTE0,F1P6C1,F1PBI6,F1PIA3,F1PIC7,F1PLA1,F1PM26,F1PPA1,F1Q1H3,J9NRV4,J9P2L4,Q29393,Q32KH1,Q32KH2
biological_process	positive regulation of cellular protein metabolic process	D3YJ60,E2QRV2,E2QS13,E2QSE3,E2QUE7,E2QUV7,E2QVF9,E2QW13,E2QWM5,E2QYU2,E2QZB3,E2QZV2,E2R030,E2R0I8,E2R1J6,E2R1S5,E2R2N2,E2R3V7,E2R498,E2R5P4,E2R5Q5,E2R6L1,E2R755,E2R771,E2R792,E2R7V4,E2R8R8,E2R8W7,E2RAA0,E2RAI8,E2RBV0,E2RD72,E2RDE0,E2RDZ4,E2REK3,E2RF98,E2RFC5,E2RFW4,E2RHY8,E2RIX2,E2RLQ9,E2RNT3,E2RPC0,E2RPE3,E2RPH1,E2RPJ4,E2RQ04,E2RQA6,E2RQL3,E2RSP4,F1P6C1,F1P774,F1P9P5,F1PA22,F1PAY5,F1PBG7,F1PBI6,…
biological_process	negative regulation of catabolic process	E2QS13,E2QT82,E2QWM9,E2QZV2,E2RAG6,E2RAN6,E2REF0,E2RKJ1,E2RLS3,E2RR33,F1P6C1,F1PF03,F1PID0,F1PLT8,F1PNF3,F1PQS2,F1PWW0,F1PX83,F1PZA0,F1PZP6,F6UT62,F6Y2H4,J9NS29,J9NU72,J9NVT9,J9P326,Q6TEQ7,Q9TTY1
biological_process	cell development	A0A140T8E0,A0A140T8E2,A2SXS5,B6V8E6,E2QSB9,E2QSE3,E2QUK0,E2QUQ0,E2QV07,E2QVP6,E2QW13,E2QWD3,E2QWL1,E2QWM4,E2QWM5,E2QWR3,E2QY07,E2QY08,E2QY30,E2QY31,E2QYU2,E2QYZ4,E2QZ11,E2QZN3,E2QZV5,E2R030,E2R0F2,E2R0R3,E2R1C9,E2R1X9,E2R2K4,E2R2N2,E2R400,E2R498,E2R4J1,E2R5P4,E2R7F1,E2R7J9,E2R7K6,E2R7S6,E2R7Z2,E2R8C0,E2R990,E2R9S7,E2RA41,E2RAA0,E2RAG6,E2RBD1,E2RBJ1,E2RBU1,E2RCI8,E2RCV4,E2RDX1,E2RF98,E2RFV8,E2RFW4…
biological_process	cellular amide metabolic process	E2QX69,E2QYU2,E2R097,E2R2V4,E2R599,E2R5B9,E2R7E8,E2RF46,E2RFL0,E2RPJ4,E2RT65,F1P7D3,F1P7M0,F1PE53,F1PGL5,F1PKN7,F1PN18,F1PY20,F1PZA1,F1Q462,F1Q4G4,F6Y290,H9GW59,J9NU72,J9NUJ7,J9PBB8,P79143,Q5JZQ9,Z4YHH2
biological_process	cellular response to endogenous stimulus	A0A0B4J195,A2SXS5,B6V8E6,E2QUH1,E2QUR2,E2QUV7,E2QV07,E2R2K4,E2R6Q7,E2R755,E2R7F1,E2R7V4,E2R9S7,E2RBU1,E2RBW8,E2RCF2,E2REF0,E2RF06,E2RF98,E2RFW4,E2RL11,E2RNE1,E2RPB8,E2RQ14,E2RQL3,E2RRC6,E2RRN8,E2RSI6,E2RSS4,E2RT60,E2RTD3,E2RTE0,F1P6B7,F1P6C1,F1P7F8,F1P8N6,F1P9H9,F1PAT6,F1PAY5,F1PB28,F1PBI6,F1PCV7,F1PE38,F1PE53,F1PEQ5,F1PF03,F1PFB4,F1PFM6,F1PG08,F1PHR2,F1PHT0,F1PHY1,F1PIA3,F1PIC7,F1PJ65,F1PKH2,F1P…
biological_process	pyridine-containing compound metabolic process	A0A0A0MPD3,E2QUI9,E2QV08,E2R0I9,E2RLQ6,E2RLQ9,E2RT65,F1P6K2,F1PE09,F1PQM1,F1PZA1,F6V404,H9GW87,J9NU72,J9NZX7
biological_process	positive regulation of translation	E2QUE7,E2R1J6,E2R1S5,E2R5Q5,E2R771,E2R8R8,E2RDZ4,E2REK3,E2RIX2,E2RNT3,E2RPH1,F1PBI6,F1PLD5,F1PLS4,F1PR95,F1Q264,F1Q2U8,F6XRY2,J9P019
biological_process	spindle organization	E2QV07,E2QYQ7,E2QZ05,E2R2P0,E2R792,E2RD72,E2RDE0,E2RGR3,E2RLQ9,E2RSI6,E2RSW0,F1P9J3,F1PD37,F1PED7,F1PGY9,F1PJG2,F1PRK3,F1PWW0,F1PX75,F6UV28,F6X637,F6XY66,F6Y5Z5,G1K268,J9NVP2,J9P3N0,J9P3T9,J9P9X3,P62490
biological_process	negative regulation of endopeptidase activity	E2QS13,E2QUV3,E2QXA6,E2R0S6,E2R886,E2RC33,E2RGP2,E2RHY7,E2RKJ6,E2RNB6,E2RNE1,F1PBI6,F1PIV3,F1PQS2,F1PUI4,F1PUM6,F1PYX9,F2Z4Q7,F6Y2H4,J9NRM1,J9NXZ3,Q9TTY1
biological_process	transport	A0A0A0MPC5,A0A140T8E2,A4GT58,B6V8E6,D3YJ60,E2QRX1,E2QS13,E2QSE3,E2QTC7,E2QTL3,E2QTN0,E2QTP7,E2QUQ0,E2QUR2,E2QUR8,E2QUU5,E2QUV3,E2QVP6,E2QW13,E2QW54,E2QW79,E2QWD1,E2QWE3,E2QWM4,E2QWM5,E2QWN7,E2QWX5,E2QXY7,E2QY31,E2QYB6,E2QYG6,E2QYI2,E2QYN4,E2QYU2,E2QZ05,E2QZN8,E2QZX1,E2R030,E2R057,E2R0D2,E2R0K8,E2R0L9,E2R0S6,E2R0T6,E2R1R4,E2R1S5,E2R1Z0,E2R236,E2R2C3,E2R2G5,E2R2K4,E2R2P0,E2R3V7,E2R446,E2R498,E2R4A3…
biological_process	vesicle organization	E2R4Q2,E2R812,E2R8C6,E2R8Y3,E2RAT8,E2REP2,E2RH29,E2RNC3,E2RPI9,E2RRB7,E2RSG8,E2RT72,F1P6B7,F1PAM9,F1PB24,F1PDM3,F1PHQ0,F1PN76,F1PU58,F1PYG5,F1Q0H3,F1Q1H3,F6UT62,F6X5M3,F6Y2H4,J9JHK6,J9NZJ6,J9P0D5,J9P1Q5,J9PAU4,P18067,Q6TEQ7
biological_process	negative regulation of metabolic process	A2SXS5,B6V8E6,E2QRQ8,E2QRX1,E2QS13,E2QT82,E2QTC7,E2QUR2,E2QV07,E2QWM9,E2QX33,E2QX86,E2QXC6,E2QXD1,E2QXF2,E2QY30,E2QYK6,E2QYZ4,E2QZV2,E2QZV5,E2R030,E2R0G3,E2R0I8,E2R0J2,E2R0T6,E2R0X9,E2R2P0,E2R412,E2R4A3,E2R5Q5,E2R792,E2R7R4,E2R8A8,E2R912,E2R990,E2RA06,E2RA27,E2RAG6,E2RAN6,E2RBU1,E2RCF2,E2RCH8,E2RCV4,E2RCZ7,E2RD72,E2RDZ4,E2REA8,E2REF0,E2RF39,E2RF98,E2RFW4,E2RGG9,E2RGJ1,E2RGR3,E2RH91,E2RHN1,E2RK00,…
biological_process	negative regulation of signaling	A0A140T8E2,A2SXS5,B6V8E6,E2QRQ8,E2QUV7,E2QVG1,E2QWE3,E2QXF2,E2QXM7,E2QY30,E2QY31,E2R030,E2R0I8,E2R0X9,E2R1M6,E2R2P0,E2R792,E2R990,E2R9F0,E2R9S7,E2RA06,E2RAN6,E2RBU1,E2RBW8,E2RC33,E2RCF2,E2RD72,E2RF76,E2RFW4,E2RGF3,E2RH70,E2RIQ2,E2RL11,E2RM91,E2RN45,E2RNY3,E2RPC0,E2RPJ4,E2RPY9,E2RRN8,E2RSI6,E2RSS4,E2RT60,E2RTE0,F1P6C1,F1P7D3,F1P914,F1PAT6,F1PAY5,F1PB05,F1PBI6,F1PCF0,F1PCG4,F1PDJ5,F1PEC4,F1PEQ5,F1P…
biological_process	regulation of signal transduction	A0A0B5CXY9,A0A140T8E2,A2SXS5,A6Q0K4,B6V8E6,D3YJ60,E2QRQ8,E2QRV2,E2QRX1,E2QS13,E2QSE3,E2QTL3,E2QUG4,E2QUI7,E2QUV7,E2QVG1,E2QW13,E2QW90,E2QWE0,E2QWE3,E2QXF2,E2QXM7,E2QXN9,E2QY30,E2QY31,E2QYN4,E2QYZ4,E2QZV2,E2QZX7,E2R030,E2R0I8,E2R0X9,E2R1C9,E2R1M6,E2R2K4,E2R2P0,E2R3V7,E2R4I1,E2R4N9,E2R5P4,E2R792,E2R7V4,E2R990,E2R9F0,E2R9N5,E2R9P2,E2R9S7,E2RA06,E2RAA0,E2RAN6,E2RBU1,E2RBW8,E2RC33,E2RCF2,E2RCH8,E2RCN3…
biological_process	protein deneddylation	E2QWE0,E2RD70,E2REA8,F1P996,F1PG59,F6V735,J9NYE0
biological_process	negative regulation of proteolysis	E2QS13,E2QT82,E2QWM9,E2QZV2,E2RAG6,E2REF0,E2RKJ1,E2RLS3,F1PQS2,F1PX83,F1PZA0,J9NSF9,J9NVT9,Q9TTY1
biological_process	regulation of protein modification process	A2SXS5,B6V8E6,D3YJ60,E2QRV2,E2QS13,E2QSE3,E2QUV7,E2QVF9,E2QW13,E2QWE3,E2QWM4,E2QWM5,E2QXM7,E2QXN9,E2QZB3,E2QZV5,E2R030,E2R0G3,E2R0I8,E2R0X9,E2R2N2,E2R2P0,E2R3V7,E2R498,E2R4A3,E2R5P4,E2R6L1,E2R755,E2R792,E2R7V4,E2R8A8,E2R8W7,E2R912,E2RAA0,E2RAG6,E2RAI8,E2RBU1,E2RBV0,E2RCF2,E2RCH8,E2RCZ7,E2RD72,E2RDE0,E2RF39,E2RF98,E2RFC5,E2RFW4,E2RGF3,E2RGG9,E2RHY8,E2RJT2,E2RKJ1,E2RLB7,E2RM91,E2RPC0,E2RPJ4,E2RQ04,…
biological_process	purine ribonucleoside monophosphate metabolic process	B4YY02,E2QYQ0,E2R3Y5,E2RE39,E2RF16,E2RGK2,F1PKY3,F1PPT7,F1Q4F5,F6UXI8,J9NVT2,J9P7I4
biological_process	single-organism cellular process	A0A077LQA5,A0A0A0MPC5,A0A0A0MPD6,A0A0B4J195,A0A0B5CXY9,A0A140T8E0,A0A140T8E2,A0M8V0,A1DZY5,A2SXS5,A4GT58,A6Q0K4,B4YY02,B6V8E6,D3YJ60,D5IGD0,E2QRQ8,E2QRV2,E2QRX1,E2QS13,E2QS34,E2QSB9,E2QSE3,E2QSF4,E2QT97,E2QTC7,E2QTL3,E2QTN0,E2QTP7,E2QTT8,E2QTX0,E2QU10,E2QUE7,E2QUG4,E2QUH1,E2QUI7,E2QUK0,E2QUQ0,E2QUR2,E2QUR8,E2QUU1,E2QUU5,E2QUV7,E2QUY2,E2QV07,E2QVF9,E2QVG1,E2QVP6,E2QW13,E2QW54,E2QW79,E2QW90,E2QWD1,…
biological_process	regulation of growth	A6Q0K4,B6V8E6,E2QSB9,E2QW13,E2QW90,E2QWM4,E2QXF2,E2QYH6,E2R0R3,E2R1X9,E2R1Z0,E2R400,E2R912,E2R9F0,E2RAN6,E2RF98,E2RGD3,E2RIM3,E2RKJ1,E2RM67,E2RND5,E2RNL2,E2RPE3,E2RSI6,E2RTD3,F1P6H7,F1P7V2,F1P9U4,F1PAY5,F1PB28,F1PCH3,F1PE28,F1PEQ5,F1PF03,F1PJ74,F1PKH2,F1PL90,F1PLR0,F1PM34,F1PNF3,F1PQX4,F1PSX9,F1PYK5,F1PYN7,F1Q225,F1Q3G2,F1Q3J6,F1Q462,F1Q4F1,F6URU8,F6UXL3,F6XQD6,F6Y2H4,J9NSF9,J9NYX7,J9P095,J9P2F4,…
biological_process	cellular metabolic compound salvage	E2QU97,E2QYQ0,E2R3Y5,E2R7C2,F1PJV5,F1PKY3,F1PX39,J9NVT2,J9P5E0,J9P5I1
biological_process	cell differentiation	A0A0A0MPD6,A0A140T8E0,A0A140T8E2,A2SXS5,B6V8E6,E2QSB9,E2QSE3,E2QTT8,E2QUK0,E2QUQ0,E2QUV7,E2QV07,E2QVF9,E2QVP6,E2QW13,E2QWD3,E2QWL1,E2QWM4,E2QWM5,E2QWR3,E2QX86,E2QXD1,E2QY07,E2QY08,E2QY30,E2QY31,E2QYN4,E2QYU2,E2QYZ4,E2QZ11,E2QZN3,E2QZV5,E2R030,E2R0D6,E2R0F2,E2R0J2,E2R0R3,E2R1C9,E2R1S5,E2R1X9,E2R2A4,E2R2K4,E2R2N2,E2R400,E2R498,E2R4A3,E2R4J1,E2R5P4,E2R612,E2R6Q7,E2R7F1,E2R7J9,E2R7K6,E2R7S6,E2R7Z2,E2…
biological_process	enzyme linked receptor protein signaling pathway	A2SXS5,B6V8E6,E2QUV7,E2QVG1,E2QW13,E2QW90,E2QWD3,E2QWE3,E2QXF2,E2R030,E2R0J2,E2R0X9,E2R2N2,E2R2P0,E2R5P4,E2R755,E2RAA0,E2RBU1,E2RBW8,E2RCF2,E2REF0,E2RF76,E2RF98,E2RFW4,E2RGF3,E2RJE0,E2RL11,E2RM91,E2RNE1,E2RQY3,E2RRN8,E2RSS4,E2RTE0,F1P6C1,F1P7F8,F1P914,F1P9H9,F1PAY5,F1PBI6,F1PE38,F1PEA6,F1PEM7,F1PEQ5,F1PF03,F1PFB4,F1PGV4,F1PHY1,F1PIA3,F1PIC7,F1PJ65,F1PJM7,F1PKH2,F1PKR0,F1PL90,F1PLA1,F1PLS4,F1PM26,…
biological_process	regulation of nucleocytoplasmic transport	E2QS13,E2QWM5,E2R3V7,E2R4A3,E2R792,E2R9K4,E2RA27,E2RF06,E2RFW4,E2RNT3,F1PAT6,F1PAY5,F1PB28,F1PLD5,F1PUN9,F1PWW0,F1Q3J6,F6UV28,J9NZ28,J9P249,J9P4N7,O02812,P62825
biological_process	negative regulation of proteasomal protein catabolic process	E2QS13,E2QT82,E2QWM9,E2QZV2,E2RAG6,E2REF0,E2RKJ1,E2RLS3,F1PX83,F1PZA0,J9NVT9
biological_process	cellular developmental process	A0A0A0MPD6,A0A140T8E0,A0A140T8E2,A2SXS5,B6V8E6,E2QSB9,E2QSE3,E2QTL3,E2QTT8,E2QUK0,E2QUQ0,E2QUV7,E2QV07,E2QVF9,E2QVP6,E2QW13,E2QWD3,E2QWE2,E2QWL1,E2QWM4,E2QWM5,E2QWR3,E2QX86,E2QXD1,E2QXY7,E2QXZ2,E2QY07,E2QY08,E2QY30,E2QY31,E2QYN4,E2QYU2,E2QYZ4,E2QZ11,E2QZ50,E2QZN3,E2QZV5,E2R030,E2R0D6,E2R0F2,E2R0J2,E2R0R3,E2R1C9,E2R1S5,E2R1X9,E2R2A4,E2R2K4,E2R2N2,E2R400,E2R498,E2R4A3,E2R4J1,E2R4N9,E2R5P4,E2R612,E2…
biological_process	programmed cell death	A1DZY5,A6Q0K4,B6V8E6,E2QRQ8,E2QRV2,E2QRX1,E2QS13,E2QTC7,E2QTL3,E2QUU5,E2QW13,E2QWE0,E2QXA6,E2QXF2,E2QXM7,E2QY30,E2QYN4,E2QYU2,E2R027,E2R030,E2R0L9,E2R0V0,E2R1V2,E2R2P0,E2R4I1,E2R543,E2R5P4,E2R8C0,E2R912,E2R9E3,E2R9S7,E2RA06,E2RA27,E2RAA0,E2RC33,E2RCI8,E2RD94,E2RE67,E2RF46,E2RF98,E2RFF1,E2RFI6,E2RFW4,E2RGF3,E2RH47,E2RHB3,E2RHN1,E2RIQ2,E2RJE0,E2RKJ1,E2RLQ9,E2RNB6,E2RNC5,E2RNW5,E2RPJ4,E2RPY9,E2RQ14,…
biological_process	purine nucleoside monophosphate metabolic process	B4YY02,E2QYQ0,E2R3Y5,E2RE39,E2RF16,E2RGK2,F1PKY3,F1PPT7,F1Q4F5,F6UXI8,J9NVT2,J9P7I4
biological_process	endosomal transport	A4GT58,E2QRX1,E2QUQ0,E2R0S6,E2R7F1,E2R812,E2R8A2,E2RAE6,E2RAT8,E2RDX0,E2REI0,E2RFW4,E2RHA6,E2RLQ9,E2RPG3,E2RRC6,E2RSI6,F1P719,F1PAM9,F1PBG7,F1PJ63,F1PN76,F1PNP7,F1PQQ3,F1PSK6,F1PYG5,F1Q1Q0,F1Q330,F6UT62,F6V393,J9JHN1,J9NUV0,J9NYJ8,J9NZ82,J9P516,P18067,Q5JZQ9
biological_process	regulation of cell death	A1DZY5,A6Q0K4,B6V8E6,E2QRQ8,E2QRX1,E2QS13,E2QTC7,E2QTL3,E2QW13,E2QWE0,E2QXA6,E2QXF2,E2QXM7,E2QY30,E2QYN4,E2QYU2,E2R030,E2R0I8,E2R0L9,E2R0V0,E2R2P0,E2R412,E2R4I1,E2R543,E2R5P4,E2R912,E2R9E3,E2R9S7,E2RA06,E2RA27,E2RAA0,E2RC33,E2RD94,E2RDX1,E2RF46,E2RFF1,E2RFW4,E2RGF3,E2RH47,E2RHB3,E2RHN1,E2RIQ2,E2RJ75,E2RJE0,E2RKJ1,E2RL17,E2RLQ9,E2RNB6,E2RNC5,E2RPJ4,E2RPY9,E2RQ14,E2RR68,E2RSA6,E2RT60,E2RTD3,E2RTJ0,…
biological_process	positive regulation of nucleocytoplasmic transport	E2QWM5,E2R3V7,E2R792,E2RA27,E2RF06,E2RFW4,E2RNT3,F1PAT6,F1PAY5,F1PB28,F1PLD5,F1PUN9,F1PWW0,F6UV28,O02812,P62825
biological_process	establishment of localization	A0A0A0MPC5,A0A140T8E2,A4GT58,B6V8E6,D3YJ60,E2QRX1,E2QS13,E2QSE3,E2QTC7,E2QTL3,E2QTN0,E2QTP7,E2QUQ0,E2QUR2,E2QUR8,E2QUU5,E2QUV3,E2QVP6,E2QW13,E2QW54,E2QW79,E2QWD1,E2QWE3,E2QWM4,E2QWM5,E2QWN7,E2QWR3,E2QWX5,E2QXY7,E2QY31,E2QYB6,E2QYG6,E2QYI2,E2QYN4,E2QYU2,E2QZ05,E2QZN8,E2QZX1,E2R030,E2R057,E2R0D2,E2R0K8,E2R0L9,E2R0S6,E2R0T6,E2R1R4,E2R1S5,E2R1Z0,E2R236,E2R2C3,E2R2G5,E2R2K4,E2R2P0,E2R3V7,E2R446,E2R498…
biological_process	protein import into nucleus	E2QZX1,E2R2P0,E2R3V7,E2R792,E2RA27,E2RB34,E2REK5,E2RF06,E2RFW4,F1PAY5,F1PB28,F1PFK6,F1PS41,F1PWW0,F1PZL7,F2Z4P5,F6UV28,F6UV54,F6X4J2,F6X637,J9NST3,J9P249,J9P4N7,J9P558,J9PAW2,O02812,P62825
biological_process	protein targeting to nucleus	E2QZX1,E2R2P0,E2R3V7,E2R792,E2RA27,E2RB34,E2REK5,E2RF06,E2RFW4,F1PAY5,F1PB28,F1PFK6,F1PS41,F1PWW0,F1PZL7,F2Z4P5,F6UV28,F6UV54,F6X4J2,F6X637,J9NST3,J9P249,J9P4N7,J9P558,J9PAW2,O02812,P62825
biological_process	response to oxidative stress	A1DZY5,A6Q0K4,E2QS13,E2QUK0,E2R2N2,E2R3R2,E2R4I1,E2R513,E2RAI8,E2REJ7,E2RHG2,E2RL17,E2RNB6,E2RNL3,E2RPJ4,E2RRD4,F1P6B7,F1P7D3,F1P912,F1PAS8,F1PBZ4,F1PC59,F1PCG4,F1PEQ7,F1PF03,F1PFM4,F1PJ74,F1PMK7,F1PQX4,F1PSX9,F1PUT6,F1PY20,F1PZA1,F1Q057,F1Q2M3,F1Q462,F6X958,J9P095,J9P8U8,J9PAW2,Q3YIX4,Q8WNN6
biological_process	negative regulation of organelle organization	A0M8V0,A6Q0K4,E2QRV2,E2QW54,E2QWL1,E2QXA5,E2QZE7,E2R1C9,E2R413,E2R4A3,E2RC33,E2RCZ7,E2RFV2,E2RGD3,E2RH71,E2RJW9,E2RNX1,E2RR96,F1P7P3,F1P9B2,F1PA22,F1PAG5,F1PFK0,F1PI20,F1PIA2,F1PQS3,F1PRK3,F1PRL5,F1PXT8,F1Q3Y0,F6UV28,F6X6W7,F6Y3P9,J9NV86,J9NVP2,J9P127,J9P1R0,J9P9V1,Q863Z4
biological_process	alternative mRNA splicing, via spliceosome	E2QXZ2,E2R7P6,E2R7Z2,E2R944,E2RDB2,E2RJL3,E2RNT3,E2RQR0,F1P7J0,F1PEA6,F1PEZ0,F1PLD5,F1PTE0,F1Q2U8,F2Z4N6,F6XAE9,J9P2I8
biological_process	regulation of cellular response to growth factor stimulus	A2SXS5,B6V8E6,E2QWE3,E2RBU1,E2RBW8,E2RCF2,E2RFW4,E2RRN8,E2RSS4,E2RTE0,F1P6C1,F1PAY5,F1PBI6,F1PIA3,F1PIC7,F1PKR0,F1PLA1,F1PM26,F1PPA1,F1PST8,F1Q147,F1Q1H3,F6XLD3,J9NRV4,J9P2L4,J9P3K0,Q29393,Q32KH1,Q32KH2
biological_process	sensory perception of smell	E2RMY4
biological_process	muscle cell development	A0A140T8E2,E2QSE3,E2QUQ0,E2QWL1,E2QY07,E2QY08,E2QZV5,E2R1C9,E2R4J1,E2R7Z2,E2RFV8,E2RHY8,E2RJE0,E2RP26,E2RSS4,E2RT60,E2RTD3,F1P912,F1PIL5,F1PJ63,F1PL90,F1PNP7,F1PR93,F1PSK6,F1PV45,F1PVV7,F1Q0N9,F1Q133,F2Z4P5,F6X6W7,F6XVD7,J9P2G7,J9P3K0,J9P4N7,J9PAS5,O02812,Z4YHI2
biological_process	regulation of cell growth	A6Q0K4,E2QSB9,E2QW13,E2QW90,E2R0R3,E2R1Z0,E2R400,E2R9F0,E2RAN6,E2RF98,E2RGD3,E2RIM3,E2RKJ1,E2RM67,E2RNL2,E2RPE3,F1P6H7,F1P9U4,F1PAY5,F1PCH3,F1PEQ5,F1PF03,F1PKH2,F1PLR0,F1PNF3,F1PSX9,F1Q225,F1Q3G2,F6URU8,F6UXL3,F6XQD6,F6Y2H4,J9NSF9,J9NYX7,J9P2F4,J9P4N7,J9PAW7,P62490,Q863Z4
biological_process	mitotic spindle organization	E2QV07,E2QYQ7,E2QZ05,E2R2P0,E2RGR3,E2RLQ9,F1PD37,F1PED7,F1PGY9,F1PRK3,F1PWW0,F6UV28,F6X637,F6XY66,G1K268,J9NVP2,J9P3N0,J9P9X3,P62490
biological_process	cell growth	A6Q0K4,E2QSB9,E2QW13,E2QW90,E2R0R3,E2R1Z0,E2R400,E2R4J1,E2R9F0,E2RAN6,E2RF98,E2RGD3,E2RIM3,E2RJ14,E2RKJ1,E2RM67,E2RNL2,E2RPE3,E2RT60,F1P6H7,F1P9U4,F1PAY5,F1PCH3,F1PEQ5,F1PF03,F1PKH2,F1PLR0,F1PNF3,F1PSX9,F1Q225,F1Q3G2,F6URU8,F6UXL3,F6XQD6,F6Y2H4,J9NSF9,J9NYX7,J9P2F4,J9P4F3,J9P4N7,J9PAW7,P62490,Q863Z4
biological_process	apoptotic process	A1DZY5,A6Q0K4,B6V8E6,E2QRQ8,E2QRV2,E2QRX1,E2QS13,E2QTC7,E2QTL3,E2QUU5,E2QW13,E2QWE0,E2QXA6,E2QXF2,E2QXM7,E2QY30,E2QYN4,E2QYU2,E2R027,E2R030,E2R0L9,E2R0V0,E2R1V2,E2R2P0,E2R4I1,E2R543,E2R5P4,E2R8C0,E2R912,E2R9E3,E2R9S7,E2RA27,E2RAA0,E2RC33,E2RCI8,E2RD94,E2RE67,E2RF46,E2RF98,E2RFF1,E2RFI6,E2RFW4,E2RGF3,E2RH47,E2RHB3,E2RHN1,E2RIQ2,E2RJE0,E2RKJ1,E2RLQ9,E2RNB6,E2RNC5,E2RNW5,E2RPJ4,E2RPY9,E2RQ14,E2RR68,…
biological_process	collagen metabolic process	E2R6Q7,E2RCF2,E2RD94,E2RHY7,E2RT60,E2RTL4,F1PHX8,F1PHY1,F1PLS4,F1PMK7,F1PS57,F1PZL5,F1Q3I5,G1K2A7,J9NS29,J9NSF9,J9NXQ0,J9NYC0
biological_process	multicellular organismal macromolecule metabolic process	E2R6Q7,E2RCF2,E2RD94,E2RHY7,E2RT60,E2RTL4,F1PHX8,F1PHY1,F1PLS4,F1PMK7,F1PS57,F1PZL5,F1Q3I5,G1K2A7,J9NS29,J9NSF9,J9NXQ0,J9NYC0
biological_process	protein targeting	E2QTL3,E2QUU5,E2QVP6,E2QWE3,E2QZX1,E2R236,E2R2G5,E2R2P0,E2R3V7,E2R792,E2R832,E2RA27,E2RAZ6,E2RB34,E2REK5,E2RF06,E2RFI6,E2RFW4,E2RND5,E2RSX0,E2RT63,F1PAY5,F1PB28,F1PFK6,F1PGL8,F1PKW7,F1PS41,F1PWW0,F1PZL7,F1PZP6,F1Q0Z5,F1Q147,F2Z4P5,F6UV28,F6UV54,F6V7F8,F6X4J2,F6X637,F6XMP7,J9NST3,J9NTJ9,J9P249,J9P4N7,J9P558,J9PAW2,O02812,P18067,P33731,P61010,P62825,Q00004
biological_process	ncRNA metabolic process	E2QRQ8,E2QRR5,E2QU31,E2QUE2,E2QUE7,E2QUR2,E2QV97,E2QXI3,E2QYZ9,E2QZ69,E2R4D5,E2R8A8,E2R9V0,E2RA59,E2RBF4,E2RCD6,E2RCI5,E2RCL4,E2RE92,E2RFR0,E2RGG9,E2RGJ1,E2RGM1,E2RH09,E2RH91,E2RHR7,E2RHW7,E2RIM3,E2RLB7,E2RNQ8,E2RQV6,E2RRM7,E2RSP4,E2RTJ7,F1P694,F1P7C2,F1PFD8,F1PI20,F1PKR6,F1PLJ9,F1PQZ7,F1PU34,F1PZP6,F1Q0Z2,F1Q1K6,F1Q1N7,F1Q332,F2Z4P2,F6V659,F6XGZ6,F6XPR6,F6XQ20,F6XRK3,F6Y140,J9P425
biological_process	wound healing	E2QWD3,E2R1E3,E2R1X9,E2R886,E2RAA0,E2RBF0,E2RCI8,E2RJE0,E2RQ14,E2RTD3,F1P6B7,F1P6H7,F1PBI6,F1PCG4,F1PGV4,F1PGZ1,F1PHH3,F1PHS5,F1PHX8,F1PJ74,F1PLV6,F1PM26,F1PQM7,F1PQS2,F1PSS8,F1PST8,F1PTE0,F1PUI4,F1PVV7,F1PWK3,F1PWW0,F1PY05,F1PYX9,F6URU8,F6V735,F6XY66,F6Y2H4,J9NSF9,J9NZ79,J9P0W8,J9P3K0,J9PAW7,Q6TEQ7
biological_process	viral infectious cycle	E2QTC7,E2R198,E2R3V7,E2R412,E2R9E3,E2RGE0,E2RLQ9,E2RNT3,E2RPE3,E2RR01,E2RRB7,F1P9H9,F1PGB6,F1PHT0,F1PJ74,F1PTL1,F1Q0H3,F1Q2U8,J9NXZ3,J9P326,J9P7U8,J9PBB8,P18067
biological_process	positive regulation of cellular component movement	E2QS34,E2QXF2,E2QZV2,E2R0R3,E2R1M6,E2R2C3,E2R400,E2R755,E2R7V4,E2R912,E2RAA0,E2RAI8,E2RFV8,E2RFW4,E2RHN1,E2RMA3,E2RRC6,E2RSP4,F1P6B7,F1P9B2,F1P9E5,F1P9Z4,F1PBI6,F1PCD8,F1PE38,F1PE53,F1PF03,F1PIC7,F1PKH2,F1PLR0,F1PQZ7,F1PR95,F1PST8,F1PSX9,F1PUI4,F1PUM6,F1PYE3,F1PYK5,F1PYQ1,F1Q147,F1Q1H3,F1Q225,F1Q3I5,F1Q3Y0,F2Z4P5,F6PME1,F6X8E7,F6XY66,J9NVP2,J9NX67,J9P923,O02812,P62490,Q06220,Q6QNF3,Q6YKA4
biological_process	nucleobase-containing small molecule metabolic process	A0A0A0MPD3,B4YY02,E2QU97,E2QUI9,E2QV08,E2QWR3,E2QX53,E2QXS7,E2QY31,E2QYG6,E2QYN4,E2QYQ0,E2QZ13,E2R095,E2R0I9,E2R0T6,E2R1E3,E2R2N2,E2R311,E2R3Y5,E2R431,E2R4N9,E2R5R9,E2R5Z9,E2R651,E2R7C2,E2R832,E2R8E3,E2R9R1,E2RAC6,E2RAM9,E2RC20,E2RE39,E2RF16,E2RFD6,E2RGK2,E2RH59,E2RKY4,E2RLQ6,E2RLQ9,E2RM30,E2RNT3,E2RPH0,E2RPS7,E2RRC6,E2RRF8,E2RSP4,E2RT60,E2RT65,F1P6C1,F1P6K2,F1P797,F1P9S5,F1PA22,F1PBG7,F1PCH3,F1P…
biological_process	regulation of angiogenesis	A0A140T8E2,B6V8E6,D3YJ60,D5IGD0,E2QWE3,E2R030,E2RCF2,E2RF39,E2RGG9,E2RMA3,E2RT60,F1P6B7,F1PBI6,F1PE53,F1PK29,F1PKH2,F1PQZ7,F1PST8,F1PSX9,F1PTF8,F1PU60,F1PUI4,F1PWM7,F1PYE3,F1PZ83,F1Q129,F1Q1H3,F2Z4Q7,F6X8E7,F6XY66,J9P530,J9P7C4,Q29393,Q32KH2
biological_process	Golgi to lysosome transport	E2R446,E2RHA6,E2RPG3,F1PGG9,F1PN76,F1Q260
biological_process	actomyosin structure organization	E2QUQ0,E2QWL1,E2QY07,E2QY08,E2QZV5,E2R1C9,E2R5Q1,E2RB32,E2RT60,F1P912,F1P9J3,F1P9W2,F1PIL5,F1PR93,F1PTI7,F1PV45,F1PVV7,F1Q0N9,F6X6W7,J9P2G7,Z4YHI2
biological_process	carbohydrate catabolic process	A0A0A0MPD0,E2R0I9,E2R1S5,E2R2C3,E2RAN6,E2RAS8,E2RFC5,E2RLQ6,E2RRC9,E2RRW9,E2RT65,F1PB77,F1PBT3,F1PE09,F1PHR2,F1PK43,F1PPB6,F1PS82,F1PSM2,F1PTZ9,F1PUL4,F1Q0K5,F6V404,G1K296,H9GW87,J9NU72,J9P687,J9PBL1
biological_process	positive regulation of catalytic activity	A1DZY5,B6V8E6,D3YJ60,E2QRV2,E2QS13,E2QTL3,E2QWJ6,E2QWM5,E2QXF2,E2QY30,E2R030,E2R0D6,E2R0L9,E2R2N2,E2R498,E2R4I1,E2R651,E2R912,E2R9R1,E2RAA0,E2RAI8,E2RD72,E2RDE0,E2REK6,E2RF98,E2RFD6,E2RHY8,E2RK00,E2RKY4,E2RLF1,E2RLQ9,E2RNT3,E2RPS7,E2RPY9,E2RQ04,E2RQL3,E2RSP4,E2RT60,F1P6C1,F1P7D3,F1PA22,F1PBG7,F1PBI6,F1PCG4,F1PD37,F1PD77,F1PDJ5,F1PEH0,F1PF03,F1PJ74,F1PKH2,F1PKW7,F1PLR0,F1PPQ3,F1PQC4,F1PQL2,F1PQX4,…
biological_process	myofibril assembly	E2QUQ0,E2QWL1,E2QY07,E2QY08,E2QZV5,E2R1C9,E2RT60,F1P912,F1PIL5,F1PR93,F1PV45,F1PVV7,F1Q0N9,F6X6W7,J9P2G7,Z4YHI2
biological_process	regulation of alternative mRNA splicing, via spliceosome	E2QXZ2,E2R7P6,E2R7Z2,E2R944,E2RDB2,E2RJL3,E2RQR0,F1PEA6,F1PEZ0,F1PLD5,F1PTE0,F1Q2U8,F2Z4N6,F6XAE9,J9P2I8
biological_process	sulfur compound metabolic process	B6V8E6,E2QU97,E2QWC1,E2QXN9,E2QXS7,E2QZ13,E2R1E3,E2R1U9,E2R311,E2R431,E2R5B9,E2R7C2,E2R857,E2RAM9,E2RFL0,E2RKY4,E2RPJ4,F1P7D3,F1PPA1,F1PY20,F1PZA1,F1Q462,G1K2D8,J9NUJ7,J9P5I1,Q29393,Q32KH1,Q32KH2
biological_process	positive regulation of locomotion	E2QRX1,E2QS34,E2QXF2,E2QZV2,E2R0R3,E2R1M6,E2R2C3,E2R400,E2R755,E2R7V4,E2R912,E2RAA0,E2RAI8,E2RFV8,E2RFW4,E2RHN1,E2RMA3,E2RRC6,E2RSP4,F1P6B7,F1P9B2,F1P9E5,F1P9Z4,F1PBI6,F1PCD8,F1PE38,F1PE53,F1PF03,F1PIC7,F1PKH2,F1PL97,F1PLR0,F1PQZ7,F1PR95,F1PST8,F1PSX9,F1PUI4,F1PUM6,F1PYE3,F1PYK5,F1PYQ1,F1Q147,F1Q1H3,F1Q225,F1Q3I5,F1Q3Y0,F2Z4P5,F6PME1,F6X8E7,F6XY66,J9NX67,J9P923,O02812,P62490,Q06220,Q6QNF3,Q6YKA4
biological_process	ion transport	A4GT58,B6V8E6,E2QS13,E2QTN0,E2QUQ0,E2QUR2,E2QWD1,E2QWM4,E2QYG6,E2R1R4,E2R1Z0,E2R4I1,E2R507,E2R651,E2RAC6,E2RAI8,E2RC33,E2RCI8,E2RD72,E2REK6,E2RGF3,E2RGI4,E2RN10,E2RN91,E2RNC3,E2RNW5,E2RNW6,E2RPC0,E2RQ10,F1P6B7,F1PA33,F1PBC8,F1PBI6,F1PDB4,F1PDJ5,F1PHJ0,F1PIL5,F1PJ63,F1PJ74,F1PKI4,F1PL90,F1PLV7,F1PQ58,F1PQQ4,F1PR93,F1PS21,F1PUM3,F1PV82,F1PWW0,F1PZE5,F2Z4P5,F6PME1,F6V735,F6X4P9,F6Y2H4,J9JHK9,J9JHN1,…
biological_process	positive regulation of cell motility	E2QS34,E2QXF2,E2QZV2,E2R0R3,E2R1M6,E2R2C3,E2R400,E2R755,E2R7V4,E2R912,E2RAA0,E2RAI8,E2RFV8,E2RFW4,E2RHN1,E2RMA3,E2RRC6,E2RSP4,F1P6B7,F1P9B2,F1P9E5,F1P9Z4,F1PBI6,F1PCD8,F1PE38,F1PE53,F1PF03,F1PIC7,F1PKH2,F1PLR0,F1PQZ7,F1PR95,F1PST8,F1PSX9,F1PUI4,F1PUM6,F1PYE3,F1PYK5,F1PYQ1,F1Q147,F1Q1H3,F1Q225,F1Q3I5,F1Q3Y0,F2Z4P5,F6PME1,F6X8E7,F6XY66,J9NX67,J9P923,O02812,P62490,Q06220,Q6QNF3,Q6YKA4
biological_process	nuclear import	E2QZX1,E2R2P0,E2R3V7,E2R792,E2RA27,E2RB34,E2REK5,E2RF06,E2RFW4,F1PAY5,F1PB28,F1PFK6,F1PS41,F1PWW0,F1PZL7,F2Z4P5,F6UV28,F6UV54,F6X4J2,F6X637,J9NST3,J9P249,J9P4N7,J9P558,J9PAW2,O02812,P62825
biological_process	pentose-phosphate shunt	E2R0I9,E2RLQ6,E2RT65,F1PE09,F6V404,H9GW87,J9NU72
biological_process	response to transforming growth factor beta stimulus	A2SXS5,E2QUV7,E2RBU1,E2RBW8,E2RCF2,E2RF98,E2RFW4,E2RPB8,E2RRN8,E2RSS4,E2RTE0,F1P6C1,F1P7F8,F1PAY5,F1PBI6,F1PFB4,F1PHY1,F1PIA3,F1PIC7,F1PKH2,F1PKR0,F1PLA1,F1PM26,F1PU60,F1PUT6,F1Q129,F1Q4K1,F6XLF1,J9NRV4,J9P2L4
biological_process	regulation of protein localization	B6V8E6,E2QRX1,E2QS13,E2QTC7,E2QTL3,E2QUQ0,E2QWM5,E2QWN7,E2QWR3,E2R057,E2R0D2,E2R2C3,E2R3V7,E2R792,E2R912,E2R9K4,E2RA27,E2RF06,E2RFW4,E2RKR1,E2RNT3,E2RSI6,E2RSP4,F1P6B7,F1P6C1,F1P6H7,F1P9B2,F1PAT6,F1PAY5,F1PB28,F1PDJ5,F1PKH2,F1PKW7,F1PL93,F1PLR0,F1PLS0,F1PS57,F1PUN9,F1PUU5,F1PV82,F1PVV7,F1PWW0,F1Q147,F1Q330,F1Q3J6,F6UT62,F6UV28,F6V322,F6V735,F6X8E7,J9JHN1,J9NSF9,J9NXT9,J9NZ28,J9P0D5,J9P249,J9P4L2,…
biological_process	COPII-coated vesicle budding	E2REP2,E2RH29,E2RRB7,E2RSG8,F1PDM3,F1PU58,F1Q0H3,F1Q1H3,J9JHK6,J9P1Q5
biological_process	positive regulation of molecular function	A1DZY5,A2SXS5,B6V8E6,D3YJ60,E2QRV2,E2QS13,E2QSE3,E2QTL3,E2QUQ0,E2QWD1,E2QWE0,E2QWJ6,E2QWM5,E2QXF2,E2QY30,E2QYU2,E2QZV2,E2R030,E2R0D6,E2R0L9,E2R2F2,E2R2N2,E2R3V7,E2R498,E2R4I1,E2R651,E2R912,E2R9R1,E2RAA0,E2RAI8,E2RD72,E2RDE0,E2REK6,E2RF98,E2RFD6,E2RH47,E2RHY8,E2RJW9,E2RK00,E2RKY4,E2RLF1,E2RLQ9,E2RMN2,E2RNT3,E2RNW6,E2RPS7,E2RPY9,E2RQ04,E2RQL3,E2RR68,E2RSP4,E2RT60,E2RTD3,F1P6C1,F1P7D3,F1P7V2,F1PA22,…
biological_process	positive regulation of cell migration	E2QS34,E2QXF2,E2QZV2,E2R0R3,E2R2C3,E2R400,E2R755,E2R7V4,E2R912,E2RAA0,E2RAI8,E2RFV8,E2RFW4,E2RHN1,E2RMA3,E2RRC6,E2RSP4,F1P6B7,F1P9B2,F1P9E5,F1P9Z4,F1PBI6,F1PCD8,F1PE38,F1PE53,F1PF03,F1PIC7,F1PKH2,F1PLR0,F1PQZ7,F1PR95,F1PST8,F1PSX9,F1PUI4,F1PUM6,F1PYE3,F1PYK5,F1PYQ1,F1Q147,F1Q1H3,F1Q225,F1Q3I5,F1Q3Y0,F2Z4P5,F6PME1,F6X8E7,F6XY66,J9NX67,O02812,P62490,Q06220,Q6QNF3,Q6YKA4
biological_process	nucleotide metabolic process	A0A0A0MPD3,B4YY02,E2QUI9,E2QV08,E2QWR3,E2QX53,E2QY31,E2QYG6,E2QYN4,E2QYQ0,E2QZ13,E2R095,E2R0I9,E2R0T6,E2R1E3,E2R311,E2R3Y5,E2R4N9,E2R5R9,E2R5Z9,E2R651,E2R832,E2R8E3,E2R9R1,E2RAC6,E2RAM9,E2RC20,E2RE39,E2RF16,E2RFD6,E2RGK2,E2RH59,E2RKY4,E2RLQ6,E2RLQ9,E2RM30,E2RNT3,E2RPH0,E2RPS7,E2RRC6,E2RRF8,E2RSP4,E2RT60,E2RT65,F1P6C1,F1P6K2,F1P797,F1P9S5,F1PA22,F1PBG7,F1PCH3,F1PDB4,F1PE09,F1PEH0,F1PIG2,F1PJ65,F1P…
biological_process	striated muscle cell development	E2QSE3,E2QUQ0,E2QWL1,E2QY07,E2QY08,E2QZV5,E2R1C9,E2R4J1,E2R7Z2,E2RFV8,E2RHY8,E2RJE0,E2RP26,E2RSS4,E2RT60,E2RTD3,F1P912,F1PIL5,F1PL90,F1PNP7,F1PR93,F1PSK6,F1PV45,F1PVV7,F1Q0N9,F1Q133,F2Z4P5,F6X6W7,F6XVD7,J9P2G7,J9P3K0,J9P4N7,J9PAS5,O02812,Z4YHI2
biological_process	positive regulation of cell morphogenesis involved in differentiation	B6V8E6,E2QWD3,E2RCV4,E2RF98,E2RFW4,E2RTE0,F1PAG6,F1PAY5,F1PDJ5,F1PKH2,F1PR95,F1PWW0,F1PYQ1,F1Q3I5,P60952
biological_process	positive regulation of actin filament polymerization	E2QWU0,E2QXY7,E2R7V4,E2RD65,E2RD72,E2RIQ2,E2RMT4,F1P679,F1PA22,F1PAG6,F1PBG7,F1PJ63,F1Q3Y0,F6Y3P9,J9NV86,J9NWK4,J9P309,J9P9Z6
biological_process	cell proliferation	A0A140T8E2,A0M8U6,A2SXS5,A6Q0K4,B6V8E6,E2QS34,E2QUV7,E2QVF9,E2QW13,E2QW90,E2QXD1,E2QXF0,E2QXF2,E2QXM7,E2QXZ2,E2QY30,E2QY31,E2QYN4,E2QYU2,E2QZ05,E2QZV2,E2QZV5,E2R030,E2R1V2,E2R2A4,E2R2K4,E2R2N2,E2R2P0,E2R498,E2R6E4,E2R7F1,E2R8L3,E2R8R8,E2R9F0,E2R9S7,E2RA06,E2RA41,E2RAA0,E2RBU1,E2RCV4,E2RD72,E2RD94,E2RDF9,E2REA8,E2RF39,E2RF98,E2RGF3,E2RGI5,E2RHN1,E2RIY4,E2RJE0,E2RJT2,E2RLM4,E2RMA3,E2RMB9,E2RNC5,E2R…
biological_process	mitotic cell cycle	B6V8E6,E2QRV2,E2QSF4,E2QUE7,E2QV07,E2QW13,E2QWL1,E2QWR3,E2QXF2,E2QY31,E2QYC2,E2QYQ7,E2QZ05,E2R1Z0,E2R2P0,E2R9E3,E2RA06,E2RCZ7,E2RD72,E2REK6,E2RF46,E2RFV2,E2RGF3,E2RGJ1,E2RGR3,E2RH71,E2RLQ9,E2RPY9,E2RRC6,E2RT60,E2RTD3,F1P6B7,F1PB28,F1PCF0,F1PD37,F1PD77,F1PED7,F1PF03,F1PGD7,F1PGY9,F1PHQ0,F1PJ65,F1PL90,F1PNF3,F1PPQ3,F1PQX4,F1PRK3,F1PSC3,F1PST8,F1PSX9,F1PU58,F1PWN6,F1PWW0,F1PYN7,F1Q3J6,F2Z4P5,F6UV28,…
biological_process	regulation of response to stimulus	A0A0B5CXY9,A0A140T8E2,A2SXS5,A6Q0K4,B6V8E6,D3YJ60,E2QRQ8,E2QRV2,E2QRX1,E2QS13,E2QSE3,E2QTL3,E2QUG4,E2QUI7,E2QUV3,E2QUV7,E2QVG1,E2QW13,E2QW90,E2QWD3,E2QWE0,E2QWE3,E2QXF2,E2QXM7,E2QXN9,E2QY30,E2QY31,E2QYN4,E2QYZ4,E2QZN3,E2QZV2,E2QZX7,E2R030,E2R0D6,E2R0I8,E2R0R3,E2R0X9,E2R1C9,E2R1M6,E2R2K4,E2R2N2,E2R2P0,E2R3V7,E2R400,E2R4A3,E2R4I1,E2R4N9,E2R4Q2,E2R5P4,E2R755,E2R792,E2R7V4,E2R886,E2R912,E2R990,E2R9F0…
biological_process	regulation of phosphorylation	A2SXS5,D3YJ60,E2QRV2,E2QS13,E2QSE3,E2QUV7,E2QW13,E2QWE3,E2QWM4,E2QWM5,E2QXN9,E2QZV5,E2R030,E2R0I8,E2R0X9,E2R2N2,E2R2P0,E2R3V7,E2R412,E2R498,E2R4L7,E2R5P4,E2R6L1,E2R755,E2R792,E2R7V4,E2R8W7,E2R912,E2RAA0,E2RAI8,E2RBU1,E2RCF2,E2RCH8,E2RCZ7,E2RD72,E2RDE0,E2RF39,E2RF98,E2RFC5,E2RFW4,E2RGF3,E2RGG9,E2RJT2,E2RK00,E2RLB7,E2RM91,E2RQ04,E2RQL3,E2RQW2,E2RRD1,E2RSP4,F1P6C1,F1P774,F1P914,F1P9S5,F1PA22,F1PAY5,…
biological_process	establishment of organelle localization	E2QXY7,E2QY31,E2QZ05,E2R1S5,E2R2P0,E2R812,E2R9K4,E2RD72,E2REP2,E2RGF3,E2RIL1,E2RSI6,E2RT72,E2RTB1,F1P679,F1P9J3,F1PGY9,F1PU58,F1PVV7,F1PVW6,F1PWN6,F1Q0H3,F1Q1H3,F6X637,F6X725,F6XQD6,J9JHN1,P60952,P62490
biological_process	'de novo' protein folding	E2QUU5,E2R0T6,E2RAU5,E2RMC1,E2RNW5,F1PIC7,F6V0D8,F6V735,G1K268,H9GW49,J9NU25
biological_process	regulation of substrate adhesion-dependent cell spreading	E2QWD3,E2QWR3,E2RF98,F1PAG6,F1PDJ5,F1PLV6,F1PR95,F1PWW0,F1PYQ1,F1Q1Q0,P60952
biological_process	regulation of transforming growth factor beta receptor signaling pathway	A2SXS5,E2RBU1,E2RBW8,E2RCF2,E2RFW4,E2RRN8,E2RSS4,E2RTE0,F1P6C1,F1PAY5,F1PBI6,F1PIA3,F1PIC7,F1PKR0,F1PLA1,F1PM26,J9NRV4,J9P2L4
biological_process	cellular response to stress	A2SXS5,A6Q0K4,E2QRQ8,E2QRV2,E2QS13,E2QSE3,E2QT97,E2QTT8,E2QUE7,E2QUK0,E2QUR8,E2QV07,E2QWE0,E2QXC6,E2QXM7,E2QXN9,E2QXU4,E2QY31,E2QYJ4,E2QYK6,E2QZV2,E2R0D6,E2R0I8,E2R0T6,E2R1X9,E2R2N2,E2R4A5,E2R4I1,E2R4J1,E2R5B9,E2R6L1,E2R792,E2R7L1,E2R7R4,E2R8E3,E2R8L3,E2R9E3,E2R9M1,E2RA27,E2RAI8,E2RAU5,E2RB31,E2RD86,E2RDF9,E2RE67,E2RF46,E2RGH5,E2RH47,E2RHG2,E2RHJ7,E2RIY4,E2RKJ1,E2RKR1,E2RL17,E2RLM4,E2RLQ9,E2RM60,…
biological_process	nucleoside monophosphate metabolic process	B4YY02,E2QYQ0,E2R3Y5,E2RE39,E2RF16,E2RGK2,E2RRF8,F1PKY3,F1PPT7,F1PX39,F1Q4F5,F6UXI8,J9NVT2,J9P7I4
biological_process	cellular modified amino acid metabolic process	E2QU97,E2QXN9,E2QXS7,E2R431,E2R4L7,E2R599,E2R5B9,E2R7C2,E2R857,E2RFL0,E2RKY4,E2RLB8,E2RNL3,E2RNW5,E2RPJ4,E2RTL4,F1P7D3,F1PBI2,F1PFD8,F1PL97,F1PY20,F1PZA1,F1PZL5,F1Q462,J9NS37,J9NSU7,J9NUJ7
biological_process	NADPH regeneration	E2R0I9,E2RLQ6,E2RT65,F1PE09,F6V404,H9GW87,J9NU72
biological_process	negative regulation of transforming growth factor beta receptor signaling pathway	E2RBU1,E2RBW8,E2RCF2,E2RRN8,E2RSS4,E2RTE0,F1P6C1,F1PIA3,F1PIC7,F1PLA1,F1PM26,J9NRV4,J9P2L4
biological_process	nucleoside phosphate metabolic process	A0A0A0MPD3,B4YY02,E2QUI9,E2QV08,E2QWR3,E2QX53,E2QY31,E2QYG6,E2QYN4,E2QYQ0,E2QZ13,E2R095,E2R0I9,E2R0T6,E2R1E3,E2R311,E2R3Y5,E2R4N9,E2R5R9,E2R5Z9,E2R651,E2R832,E2R8E3,E2R9R1,E2RAC6,E2RAM9,E2RC20,E2RE39,E2RF16,E2RFD6,E2RGK2,E2RH59,E2RKY4,E2RLQ6,E2RLQ9,E2RM30,E2RNT3,E2RPH0,E2RPS7,E2RRC6,E2RRF8,E2RSP4,E2RT60,E2RT65,F1P6C1,F1P6K2,F1P797,F1P9S5,F1PA22,F1PBG7,F1PCH3,F1PDB4,F1PE09,F1PEH0,F1PIG2,F1PJ65,F1P…
biological_process	positive regulation of viral genome replication	E2QTC7,E2R198,E2R412,E2R9E3,E2RRB7,F1PHT0,F1PTL1,J9P326,J9P7U8
biological_process	purine nucleoside monophosphate biosynthetic process	E2QYQ0,E2R3Y5,E2RGK2,F1PKY3,F1PPT7,F1Q4F5,F6UXI8,J9NVT2,J9P7I4
biological_process	purine ribonucleoside monophosphate biosynthetic process	E2QYQ0,E2R3Y5,E2RGK2,F1PKY3,F1PPT7,F1Q4F5,F6UXI8,J9NVT2,J9P7I4
biological_process	regulation of protein export from nucleus	E2QS13,E2QWM5,E2R9K4,E2RA27,F1PAT6,F1PUN9,F1Q3J6,J9NZ28,P62825
biological_process	negative regulation of transmembrane receptor protein serine/threonine kinase signaling pathway	E2QUV7,E2QVG1,E2R030,E2RBU1,E2RBW8,E2RCF2,E2RF76,E2RRN8,E2RSS4,E2RTE0,F1P6C1,F1PIA3,F1PIC7,F1PLA1,F1PM26,F1PQL2,J9NRV4,J9P2L4,J9P4N7
biological_process	neurological system process	A6Q0K4,B6V8E6,E2QRX1,E2QS13,E2QSE3,E2QTN0,E2QUK0,E2QVP6,E2QWM4,E2QWM5,E2QXF2,E2QY31,E2QYU2,E2QZN3,E2QZX7,E2R1C9,E2R2K4,E2R2N2,E2R416,E2R4J1,E2R543,E2RAT8,E2RD72,E2RGF3,E2RHY8,E2RJE0,E2RJN7,E2RLF1,E2RMB9,E2RMY4,E2RNC3,E2RND5,E2RPS0,E2RQE7,E2RT60,E2RTD3,F1P6U6,F1P7C2,F1PA22,F1PAT6,F1PB28,F1PEC4,F1PEH0,F1PGL8,F1PJ74,F1PJM7,F1PKB2,F1PKR0,F1PL90,F1PPS3,F1PQL2,F1PQM7,F1PU60,F1PVV7,F1PY05,F1Q3I5,F1Q462,…
biological_process	nucleobase-containing compound catabolic process	E2QWR3,E2QXS7,E2QY31,E2QYN4,E2R1J6,E2R412,E2R4N9,E2R651,E2R7P6,E2R7S6,E2R8E3,E2R990,E2R9R1,E2RCI5,E2RDZ4,E2RFD6,E2RH09,E2RH91,E2RIM3,E2RKY4,E2RLQ9,E2RNT3,E2RPH0,E2RPH1,E2RPS7,E2RRC6,E2RRF8,E2RT60,F1P6C1,F1P9S5,F1PA22,F1PBG7,F1PDH7,F1PEA6,F1PI20,F1PJ65,F1PKY3,F1PLR0,F1PPB6,F1PQM1,F1PQZ7,F1PSV4,F1Q1B1,F1Q3Y0,F1Q462,F1Q4B4,F6V9Q0,F6XAE9,F6Y140,H9GWE2,J9JHU4,J9NS50,J9NY44,J9P326,J9P3T9
biological_process	alpha-amino acid metabolic process	A0A0B4J194,A0A0B4J195,E2QU97,E2QXN9,E2QXS7,E2R3N2,E2R4L7,E2R7C2,E2R857,E2RDN1,E2RF46,E2RFD0,E2RKY4,E2RLB8,E2RLU9,E2RNL3,E2RNW5,E2RPJ4,E2RPN5,E2RS63,E2RTL4,F1P7D3,F1PBI2,F1PFD8,F1PHM4,F1PL97,F1PW12,F1PY28,F1PZL5,J9NS37,J9NSU7,J9P266,J9P5I1
biological_process	regulation of macromolecule metabolic process	A0A0A0MPC5,A0A0A0MPD6,A2SXS5,B6V8E6,D3YJ60,E2QRQ8,E2QRV2,E2QRX1,E2QS13,E2QS34,E2QSE3,E2QT82,E2QTC7,E2QTX0,E2QUE7,E2QUK0,E2QUR2,E2QUR8,E2QUV7,E2QUY7,E2QV07,E2QVF9,E2QVG1,E2QVN6,E2QW13,E2QWE0,E2QWE3,E2QWM4,E2QWM5,E2QWM9,E2QX33,E2QX86,E2QXC6,E2QXD1,E2QXF2,E2QXM7,E2QXN9,E2QXY7,E2QXZ2,E2QY30,E2QYH6,E2QYK6,E2QYU2,E2QYZ4,E2QZB3,E2QZV2,E2QZV5,E2R030,E2R068,E2R0D6,E2R0G3,E2R0I8,E2R0J2,E2R0L9,E2R0T6,E2R0X9…
biological_process	cellular amino acid biosynthetic process	A0A0B4J195,E2QU97,E2QXN9,E2R3N2,E2R431,E2R4L7,E2R7C2,E2RDN1,E2RF46,E2RPJ4,E2RPN5,E2RTL4,F1P7D3,F1PFD8,F1PHM4,F1PY28,F1PZL5,J9NS37,J9P5I1
biological_process	ribonucleoside monophosphate metabolic process	B4YY02,E2QYQ0,E2R3Y5,E2RE39,E2RF16,E2RGK2,F1PKY3,F1PPT7,F1Q4F5,F6UXI8,J9NVT2,J9P7I4
biological_process	positive regulation of hydrolase activity	A1DZY5,E2QTL3,E2QWJ6,E2QXF2,E2QY30,E2R0D6,E2R4I1,E2R651,E2R912,E2R9R1,E2RAA0,E2REK6,E2RFD6,E2RHY8,E2RK00,E2RKY4,E2RLF1,E2RLQ9,E2RNT3,E2RPS7,E2RPY9,E2RT60,F1P6C1,F1PA22,F1PBG7,F1PD37,F1PD77,F1PDJ5,F1PLR0,F1PUN9,F1Q1H3,F1Q3Y0,F1Q4K1,F6UY11,F6XY66,F6Y3P9,J9P332,J9P3T9,Q6QNF3,Q6YKA4
biological_process	response to abiotic stimulus	A2SXS5,D3YJ60,E2QTC7,E2QTT8,E2QUE7,E2QUK0,E2QUU5,E2QV07,E2QXD1,E2QXF2,E2QYG6,E2QZX7,E2R027,E2R0D6,E2R0T6,E2R6L1,E2R771,E2R7F3,E2R9U8,E2RA27,E2RAI8,E2RAU5,E2RB31,E2RC33,E2RCV4,E2RDF9,E2RE67,E2REJ7,E2RFV8,E2RIY4,E2RKJ1,E2RL17,E2RLQ9,E2RM67,E2RMB9,E2RNB6,E2RPC0,E2RPH1,E2RPJ4,E2RQW2,E2RRN8,E2RT60,F1P6B7,F1P7M0,F1P7S9,F1P8N6,F1P9H9,F1PAT6,F1PAY5,F1PF03,F1PGY1,F1PIC7,F1PIL5,F1PKH2,F1PKY3,F1PL97,F1PME4,…
biological_process	regulation of protein phosphorylation	A2SXS5,D3YJ60,E2QRV2,E2QS13,E2QSE3,E2QUV7,E2QW13,E2QWE3,E2QWM4,E2QWM5,E2QXN9,E2QZV5,E2R030,E2R0I8,E2R0X9,E2R2N2,E2R2P0,E2R3V7,E2R498,E2R5P4,E2R6L1,E2R755,E2R792,E2R7V4,E2R8W7,E2R912,E2RAA0,E2RAI8,E2RBU1,E2RCF2,E2RCH8,E2RCZ7,E2RD72,E2RDE0,E2RF39,E2RF98,E2RFC5,E2RFW4,E2RGF3,E2RGG9,E2RJT2,E2RLB7,E2RM91,E2RQ04,E2RQL3,E2RQW2,E2RRD1,E2RSP4,F1P6C1,F1P774,F1P914,F1P9S5,F1PA22,F1PAY5,F1PBG7,F1PBI6,F1PCG4,…
biological_process	regulation of cell communication	A0A0B5CXY9,A0A140T8E2,A2SXS5,A6Q0K4,B6V8E6,D3YJ60,E2QRQ8,E2QRV2,E2QRX1,E2QS13,E2QSE3,E2QTL3,E2QTN0,E2QUG4,E2QUI7,E2QUV7,E2QVG1,E2QVP6,E2QW13,E2QW90,E2QWE0,E2QWE3,E2QXF2,E2QXM7,E2QXN9,E2QY30,E2QY31,E2QYN4,E2QYZ4,E2QZV2,E2QZX7,E2R030,E2R0I8,E2R0X9,E2R1C9,E2R1M6,E2R2K4,E2R2N2,E2R2P0,E2R3V7,E2R4I1,E2R4N9,E2R5P4,E2R792,E2R7V4,E2R990,E2R9F0,E2R9N5,E2R9P2,E2R9S7,E2RA06,E2RAA0,E2RAN6,E2RAT8,E2RBU1,E2RBW8…
biological_process	endodermal cell differentiation	B6V8E6,E2QTT8,E2QW13,F1P6H7,F1PCD8,F1PFM6,F1PMK7,F1PQL2,F1PUM6,F1PY05,F1Q129
biological_process	regulation of primary metabolic process	A0A0A0MPC5,A0A0A0MPD6,A2SXS5,B6V8E6,D3YJ60,E2QRQ8,E2QRV2,E2QS13,E2QS34,E2QSE3,E2QT82,E2QTC7,E2QTX0,E2QUE7,E2QUK0,E2QUR2,E2QUR8,E2QUV7,E2QUY7,E2QV07,E2QVF9,E2QVG1,E2QVN6,E2QW13,E2QW90,E2QWE0,E2QWE3,E2QWM4,E2QWM5,E2QWM9,E2QWR3,E2QX33,E2QX86,E2QXC6,E2QXM7,E2QXN9,E2QXY7,E2QXZ2,E2QY30,E2QY31,E2QYH6,E2QYK6,E2QYN4,E2QYU2,E2QYZ4,E2QZB3,E2QZV2,E2QZV5,E2R030,E2R068,E2R0D6,E2R0G3,E2R0I8,E2R0J2,E2R0L9,E2R0T6…
biological_process	regulation of cell morphogenesis involved in differentiation	A0A140T8E0,B6V8E6,E2QSB9,E2QWD3,E2QWR3,E2QY31,E2R030,E2R0R3,E2R400,E2RBU1,E2RCV4,E2RF98,E2RFW4,E2RGD3,E2RPE3,E2RRN8,E2RTE0,F1P6H7,F1P9S5,F1P9U4,F1PAG6,F1PAY5,F1PDJ5,F1PEC4,F1PKH2,F1PLV6,F1PR95,F1PV82,F1PWW0,F1PYQ1,F1Q1Q0,F1Q2U8,F1Q3I5,F2Z4P5,F6XQD6,J9NXT9,J9P6N4,J9PAW7,P60952,P62490,Q9TSZ6
biological_process	negative regulation of transport	A4GT58,E2QS13,E2QUQ0,E2R0D2,E2R2K4,E2R4I1,E2R912,E2RAI8,E2REK6,E2RGF3,E2RNB6,E2RNW6,E2RPC0,E2RSI6,E2RTI3,F1P6B7,F1P6H7,F1PBI6,F1PDJ5,F1PIK5,F1PJ63,F1PKW7,F1PKY3,F1PLR0,F1PQQ4,F1PUM3,F1PV82,F1PWW0,F1Q3J6,F6PME1,F6UT62,F6UV28,F6X8E7,F6XQD6,F6Y2H4,J9NXT9,J9NZ28,J9P249,J9P4L2,J9P4N7,Q6YKA4
biological_process	'de novo' posttranslational protein folding	E2R0T6,E2RAU5,E2RMC1,E2RNW5,F1PIC7,F6V0D8,F6V735,G1K268,H9GW49,J9NU25
biological_process	negative regulation of phosphate metabolic process	A2SXS5,E2QS13,E2QZV5,E2R030,E2R0I8,E2R0X9,E2R2P0,E2R412,E2R912,E2RBU1,E2RCF2,E2RCH8,E2RCZ7,E2RF98,E2RGG9,E2RK00,E2RM91,E2RQW2,E2RRD1,E2RSU6,F1P914,F1PJ65,F1PJ74,F1PKU3,F1PKW7,F1PLR0,F1PM26,F1PNF3,F1PQL2,F1PRR3,F1Q1Q0,F1Q2M3,F6UMY5,F6V322,F6XVD7,F6XY66,J9P6D6
biological_process	negative regulation of phosphorus metabolic process	A2SXS5,E2QS13,E2QZV5,E2R030,E2R0I8,E2R0X9,E2R2P0,E2R412,E2R912,E2RBU1,E2RCF2,E2RCH8,E2RCZ7,E2RF98,E2RGG9,E2RK00,E2RM91,E2RQW2,E2RRD1,E2RSU6,F1P914,F1PJ65,F1PJ74,F1PKU3,F1PKW7,F1PLR0,F1PM26,F1PNF3,F1PQL2,F1PRR3,F1Q1Q0,F1Q2M3,F6UMY5,F6V322,F6XVD7,F6XY66,J9P6D6
biological_process	regulation of signaling	A0A0B5CXY9,A0A140T8E2,A2SXS5,A6Q0K4,B6V8E6,D3YJ60,E2QRQ8,E2QRV2,E2QRX1,E2QS13,E2QSE3,E2QTL3,E2QTN0,E2QUG4,E2QUI7,E2QUV7,E2QVG1,E2QVP6,E2QW13,E2QW90,E2QWE0,E2QWE3,E2QXF2,E2QXM7,E2QXN9,E2QY30,E2QY31,E2QYN4,E2QYZ4,E2QZV2,E2QZX7,E2R030,E2R0I8,E2R0X9,E2R1C9,E2R1M6,E2R2K4,E2R2N2,E2R2P0,E2R3V7,E2R4I1,E2R4N9,E2R5P4,E2R792,E2R7V4,E2R990,E2R9F0,E2R9N5,E2R9P2,E2R9S7,E2RA06,E2RAA0,E2RAN6,E2RAT8,E2RBU1,E2RBW8…
biological_process	cell adhesion mediated by integrin	E2QSE3,E2QWD3,E2R912,E2RF98,E2RT60,F1P6U6,F1P9B2,F1PE38,F1PEC4,F1PIA3,F1PKH2,F1PKY3,F1PUI4,F1PUM6,F1PV78,F1PY05,F1Q3J6,J9P4N7,Q863H1
biological_process	single-organism carbohydrate catabolic process	A0A0A0MPD0,E2R0I9,E2R1S5,E2R2C3,E2RAN6,E2RAS8,E2RFC5,E2RLQ6,E2RRC9,E2RT65,F1PB77,F1PBT3,F1PE09,F1PHR2,F1PK43,F1PS82,F1PSM2,F1PTZ9,F1PUL4,F1Q0K5,F6V404,G1K296,H9GW87,J9NU72,J9P687,J9PBL1
biological_process	organelle assembly	E2QV07,E2QWN7,E2R1S5,E2R498,E2R4Q2,E2R792,E2R7F1,E2R990,E2RDE0,E2RGR3,E2RHJ7,E2RIQ8,E2RPC0,E2RR58,E2RRC6,E2RSI6,E2RTI3,F1P7B0,F1PFR1,F1PGD7,F1PJG2,F1PR95,F1PRK3,F1PUX4,F1PWN6,F1PWW0,F1PYU3,F1Q0H3,F1Q1T5,F1Q2L2,F1Q424,F1Q4I8,F1Q4J5,F6UV28,F6V0P6,F6X637,F6XY66,F6Y3P9,F6Y5Z5,G1K268,H9GWC5,J9JHJ2,J9NRM1,J9NVU2,J9P1I4,J9P3N0,J9P425,J9P9X3,P18067,P62490
biological_process	carbohydrate metabolic process	A0A0A0MPD0,A0A0B4J195,D3YJ60,E2QV08,E2QV12,E2QW90,E2QWN4,E2QX53,E2R0I8,E2R0I9,E2R0J2,E2R1S5,E2R2C3,E2R5R9,E2R5Z9,E2R761,E2R832,E2RAN6,E2RAS8,E2RBX6,E2RFC5,E2RGG9,E2RH59,E2RJW5,E2RKK6,E2RLQ6,E2RLQ9,E2RM54,E2RNA7,E2RNE1,E2RPJ4,E2RQ08,E2RR16,E2RRC9,E2RRW9,E2RT65,E2RTL4,F1P835,F1PB77,F1PBT3,F1PDA7,F1PE09,F1PED7,F1PEQ5,F1PEQ7,F1PGP3,F1PGZ1,F1PHR2,F1PK43,F1PK73,F1PKB2,F1PPB6,F1PS30,F1PS82,F1PSA3,F1PSM2…
biological_process	regulation of microtubule-based process	B6V8E6,E2QRV2,E2QV07,E2QWR3,E2QY31,E2R2P0,E2R9K4,E2RDE0,E2RFV2,E2RGR3,E2RNF2,E2RNX1,E2RQW2,E2RS94,E2RTB1,F1PE53,F1PED7,F1PFG6,F1PGY9,F1PN67,F1PWN6,F1PYQ1,F1PZE5,F6UV28,F6XQD6,F6XY66,F6Y5Z5,G1K268,J9NVP2,J9P3T9,J9PAW7,P60952
biological_process	ion transmembrane transport	B6V8E6,E2QUQ0,E2QWD1,E2QYG6,E2R1R4,E2R1Z0,E2RAC6,E2RAI8,E2RCI8,E2REK6,E2RGF3,E2RGI4,E2RN91,E2RNW6,E2RPC0,F1PA33,F1PBI6,F1PDB4,F1PIL5,F1PJ63,F1PKI4,F1PQQ4,F1PR93,F1PS21,F1PUM3,F1PV82,F1PWW0,F6PME1,F6X4P9,J9P6N4,J9P969,Q864L3
biological_process	positive regulation of cell cycle process	E2QUE7,E2QWL1,E2QWR3,E2R2P0,E2RCZ7,E2RD94,E2RGJ1,E2RH71,E2RKJ1,E2RRC6,E2RTD3,F1P6B7,F1PAT6,F1PE53,F1PF03,F1PL90,F1PNF3,F1PPQ3,F1PSX9,F1PU58,F1PWN6,F1PYN7,F6UV28,F6XY66,J9P3T9,P60952,P62490,Q3YIX4
biological_process	growth	A0A140T8E2,A6Q0K4,B6V8E6,E2QSB9,E2QW13,E2QW90,E2QWM4,E2QXF2,E2QYH6,E2QZN8,E2QZV5,E2R0R3,E2R1X9,E2R1Z0,E2R400,E2R4J1,E2R8L3,E2R912,E2R9F0,E2RAN6,E2RCI8,E2REA8,E2RF98,E2RGD3,E2RIM3,E2RJ14,E2RJE0,E2RJW9,E2RKJ1,E2RLF1,E2RM67,E2RND5,E2RNL2,E2RPE3,E2RSI6,E2RT60,E2RT85,E2RTD3,F1P6B7,F1P6H7,F1P7V2,F1P9U4,F1PAY5,F1PB28,F1PCH3,F1PE28,F1PEQ5,F1PF03,F1PFM6,F1PGB2,F1PHH3,F1PJ74,F1PKH2,F1PL90,F1PLR0,F1PM34,F1P…
biological_process	aspartate family amino acid biosynthetic process	A0A0B4J195,E2QU97,E2R7C2,E2RF46,E2RTL4,F1PHM4,F1PZL5,J9P5I1
biological_process	positive regulation of signal transduction	A2SXS5,B6V8E6,D3YJ60,E2QRV2,E2QRX1,E2QSE3,E2QTL3,E2QUV7,E2QW13,E2QW90,E2QY31,E2QYZ4,E2R030,E2R1C9,E2R2K4,E2R2P0,E2R3V7,E2R4I1,E2R5P4,E2R792,E2R7V4,E2R9P2,E2R9S7,E2RAA0,E2REK6,E2RF98,E2RFV8,E2RFW4,E2RGF3,E2RH47,E2RJH2,E2RKJ1,E2RLF1,E2RLQ9,E2RNC5,E2RNE1,E2RQC9,E2RSP4,E2RT60,E2RTD3,E2RTE0,F1P6C1,F1P774,F1P7V2,F1P9H9,F1PAY5,F1PBI6,F1PCG4,F1PCV7,F1PDJ5,F1PE38,F1PEA6,F1PEC4,F1PEH0,F1PEQ5,F1PF03,F1PGL8,…
biological_process	tissue development	A0A140T8E2,B6V8E6,E2QSE3,E2QTT8,E2QUG4,E2QUQ0,E2QUV3,E2QUV7,E2QVF9,E2QW13,E2QXD1,E2QXN9,E2QY07,E2QY08,E2QY30,E2QY31,E2QYZ4,E2QZV2,E2QZV5,E2R030,E2R0D6,E2R0F2,E2R0J2,E2R0R3,E2R1X9,E2R2C3,E2R2K4,E2R2N2,E2R400,E2R4J1,E2R543,E2R612,E2R6Q7,E2R7F1,E2R7J9,E2R7Z2,E2R8A8,E2RA06,E2RAA0,E2RB34,E2RBD1,E2RBU1,E2RBW8,E2RCI8,E2RCV4,E2RCZ7,E2RD72,E2RDB1,E2RDX1,E2REA8,E2RFV8,E2RFW4,E2RGF3,E2RHY7,E2RHY8,E2RJ14,E2R…
biological_process	regulation of vasculature development	A0A140T8E2,B6V8E6,D3YJ60,D5IGD0,E2QWE3,E2R030,E2RCF2,E2RF39,E2RGG9,E2RMA3,E2RT60,F1P6B7,F1PBI6,F1PE53,F1PK29,F1PKH2,F1PQZ7,F1PST8,F1PSX9,F1PTF8,F1PU60,F1PUI4,F1PWM7,F1PYE3,F1PZ83,F1Q129,F1Q1H3,F2Z4Q7,F6X8E7,F6XY66,J9P530,J9P7C4,Q29393,Q32KH2
biological_process	response to topologically incorrect protein	E2QYU2,E2R0T6,E2RA27,E2RAU5,E2RJE0,E2RLQ9,E2RNW5,E2RR16,F1PIC7,F1PPQ3,F1PU58,F6V322,F6V735,G1K268,H9GW49,J9NRV4,J9NU25,J9P095
biological_process	NADP metabolic process	E2R0I9,E2RLQ6,E2RT65,F1PE09,F1PZA1,F6V404,H9GW87,J9NU72,J9NZX7
biological_process	intra-Golgi vesicle-mediated transport	E2QWX5,E2R667,E2R9A2,E2RAT6,E2RPG9,F1PDY2,F1PFR1,F1PU93,J9NYJ8
biological_process	aromatic compound catabolic process	E2QVU9,E2QWR3,E2QXS7,E2QY31,E2QYN4,E2R1J6,E2R412,E2R4N9,E2R513,E2R651,E2R7P6,E2R7S6,E2R8E3,E2R990,E2R9R1,E2RCI5,E2RDZ4,E2REH5,E2RFD6,E2RH09,E2RH91,E2RIM3,E2RKY4,E2RLQ9,E2RLU9,E2RNT3,E2RPH0,E2RPH1,E2RPS7,E2RRC6,E2RRF8,E2RS63,E2RT60,F1P6C1,F1P9S5,F1PA22,F1PBG7,F1PDH7,F1PEA6,F1PI20,F1PJ65,F1PKY3,F1PLR0,F1PPB6,F1PQM1,F1PQZ7,F1PSV4,F1Q1B1,F1Q3Y0,F1Q462,F1Q4B4,F6V9Q0,F6XAE9,F6Y140,H9GWE2,J9JHU4,J9NS50,…
biological_process	NLS-bearing substrate import into nucleus	E2RF06,F1PFK6,F1PZL7,F6UV54,F6X637,J9NST3
biological_process	chaperone-mediated protein complex assembly	E2QYU2,E2RT63,F6V0D8,J9NRV4,J9NT37,Q5TJE6
biological_process	negative regulation of mRNA splicing, via spliceosome	E2R0G3,F1PEZ0,F1PR95,F1PTE0,F1Q1K6,J9P2I8
biological_process	cellular response to transforming growth factor beta stimulus	A2SXS5,E2QUV7,E2RBU1,E2RBW8,E2RCF2,E2RF98,E2RFW4,E2RPB8,E2RRN8,E2RSS4,E2RTE0,F1P6C1,F1P7F8,F1PAY5,F1PBI6,F1PFB4,F1PHY1,F1PIA3,F1PIC7,F1PKH2,F1PKR0,F1PLA1,F1PM26,F1PUT6,F1Q129,F1Q4K1,J9NRV4,J9P2L4
biological_process	mitochondrial electron transport, ubiquinol to cytochrome c	E2RR27,P00011
biological_process	cell-matrix adhesion	B6V8E6,E2QUQ0,E2QWR3,E2QY08,E2R030,E2R912,E2RJT2,E2RLM4,E2RT60,F1P6H7,F1P7F8,F1PBI6,F1PE38,F1PFB4,F1PU60,F1PUI4,F1PUM6,F1PUT6,F1PXK3,F1PYK5,F1PYQ1,F1Q1Q0,F6UXL3,F6XY66,J9NTX8,J9P1H1,J9PAW7
biological_process	double-strand break repair via homologous recombination	E2R9M1,F1P9H9
biological_process	microtubule-based process	A0A077LQA5,B6V8E6,E2QRV2,E2QSB9,E2QSF4,E2QTN0,E2QV07,E2QWE2,E2QWR3,E2QXY7,E2QY31,E2QYC2,E2QYQ7,E2QZ05,E2R0T6,E2R2P0,E2R498,E2R792,E2R9K4,E2RBC1,E2RD72,E2RDE0,E2RDT0,E2RFV2,E2RG27,E2RGR3,E2RH71,E2RJF8,E2RK00,E2RLP1,E2RLQ9,E2RM92,E2RNF2,E2RNX1,E2RPG9,E2RQW2,E2RS94,E2RSI6,E2RSW0,E2RTB1,F1P679,F1P6V8,F1P9J3,F1PB28,F1PD37,F1PD49,F1PE53,F1PED7,F1PF15,F1PFG6,F1PGY9,F1PH39,F1PJG2,F1PN67,F1PQ68,F1PQQ3,F1P…
biological_process	regulation of cell shape	E2QWD3,E2QXD1,E2R4N9,E2R7F1,E2RD72,E2RGF3,E2RIL1,E2RRC6,E2RSI6,F1P6B7,F1P912,F1P9J3,F1P9Q2,F1P9S5,F1PR93,F1PVV7,F1PZE5,F6XY66,J9NSF9,J9NTM8,J9NWK4,P60952
biological_process	nitrogen compound metabolic process	A0A0A0MPC5,A0A0A0MPD3,A0A0A0MPD6,A0A0B4J194,A0A0B4J195,A2SXS5,B4YY02,B6V8E6,E2QRQ8,E2QRR5,E2QS13,E2QS34,E2QS94,E2QSE3,E2QTC7,E2QTX0,E2QU31,E2QU97,E2QUE2,E2QUE7,E2QUI9,E2QUJ4,E2QUK0,E2QUR2,E2QUR8,E2QUV7,E2QV07,E2QV08,E2QV97,E2QVG1,E2QVN6,E2QVU9,E2QW13,E2QW27,E2QWC1,E2QWE0,E2QWM5,E2QWR3,E2QX33,E2QX53,E2QX69,E2QX86,E2QXC6,E2QXI3,E2QXM7,E2QXN9,E2QXR8,E2QXS7,E2QXU4,E2QXY7,E2QXZ2,E2QY30,E2QY31,E2QYG6,E…
biological_process	cellular response to nitrogen compound	A0A0B4J195,B6V8E6,E2QSE3,E2QUR2,E2R2K4,E2R3V7,E2R412,E2R755,E2R9S7,E2REF0,E2RF06,E2RL11,E2RNE1,E2RNT3,E2RQ14,E2RQL3,E2RQV6,E2RSI6,E2RTD3,F1P8N6,F1P9H9,F1PCV7,F1PEQ5,F1PF03,F1PFM6,F1PG08,F1PHR2,F1PHT0,F1PHY1,F1PLS4,F1PMK7,F1PQC4,F1PQZ7,F1PUT6,F1PZE5,F1PZP6,F1Q133,F1Q147,F1Q1K6,F1Q235,F1Q2M3,F1Q3I5,F1Q3J6,F6V2H2,F6X8E7,J9NUV0,J9NY23,J9P9Z6
biological_process	regulation of developmental process	A0A0A0MPD6,A0A140T8E0,A0A140T8E2,A2SXS5,B6V8E6,D3YJ60,D5IGD0,E2QRX1,E2QSB9,E2QSE3,E2QTL3,E2QUV3,E2QUV7,E2QV07,E2QVP6,E2QW13,E2QWD3,E2QWE3,E2QWM5,E2QWR3,E2QXD1,E2QXM7,E2QY30,E2QY31,E2QYZ4,E2R030,E2R0R3,E2R1S5,E2R2N2,E2R400,E2R498,E2R4A3,E2R4N9,E2R612,E2R7F1,E2R7K6,E2R7S6,E2R7Z2,E2R8C0,E2R990,E2R9S7,E2RAA0,E2RAG6,E2RAU5,E2RBU1,E2RBV0,E2RBW8,E2RCF2,E2RCH8,E2RCV4,E2RCZ7,E2RD72,E2RF39,E2RF98,E2RFV8,E2…
biological_process	negative regulation of cellular catabolic process	E2QS13,E2QWM9,E2QZV2,E2RAG6,E2RAN6,E2REF0,E2RKJ1,F1PID0,F1PLT8,F1PNF3,F1PQS2,F1PX83,F1PZP6,J9NS29,J9NU72,J9NVT9,J9P326,Q6TEQ7,Q9TTY1
biological_process	recombinational repair	E2R9M1,F1P9H9
biological_process	retrograde vesicle-mediated transport, Golgi to ER	E2R667,E2R8Y3,E2RAT6,E2RT72,F1PDY2,F1PFR1,F1PRT4,F1PU93,J9NYJ8,J9P0D5,J9P396
biological_process	multicellular organismal metabolic process	E2R6Q7,E2RCF2,E2RD94,E2RHY7,E2RT60,E2RTL4,F1PHX8,F1PHY1,F1PLS4,F1PMK7,F1PS57,F1PZL5,F1Q3I5,G1K2A7,J9NS29,J9NSF9,J9NXQ0,J9NYC0
biological_process	virus-host interaction	E2QZN8,E2R6Q7,E2R9E3,E2RAT8,E2RRB7,F1P9H9,F1PAM9,F1PGV4,F1PL97,F1PSX9,F1Q2U8,F6UT62,F6XEL1,F6Y3P9,Q5WR10,Q9TSZ6
biological_process	cellular response to acid	E2RF06,F1PCV7,F1PF03,F1PFM6,F1PG08,F1PHY1,F1PMK7,F1PZP6,F1Q133,F1Q235,F1Q3I5,J9NY23
biological_process	cellular response to amino acid stimulus	E2RF06,F1PCV7,F1PF03,F1PFM6,F1PG08,F1PHY1,F1PMK7,F1PZP6,F1Q133,F1Q235,F1Q3I5,J9NY23
biological_process	positive regulation of mitotic cell cycle phase transition	E2QWL1,E2QWR3,E2RGJ1,E2RRC6,E2RTD3,F1P6B7,F1PF03,F1PL90,F1PNF3,F1PPQ3,F1PSX9,F1PU58,P62490
biological_process	negative regulation of proteasomal ubiquitin-dependent protein catabolic process	E2QS13,E2QWM9,E2QZV2,E2RAG6,E2REF0,E2RKJ1,F1PX83,J9NVT9
biological_process	positive regulation of macromolecule metabolic process	A0A0A0MPD6,B6V8E6,D3YJ60,E2QRV2,E2QRX1,E2QS13,E2QSE3,E2QTX0,E2QUE7,E2QUK0,E2QUR8,E2QUV7,E2QVF9,E2QW13,E2QWE0,E2QWE3,E2QWM5,E2QXM7,E2QXY7,E2QY30,E2QYH6,E2QYU2,E2QZB3,E2QZV2,E2R030,E2R068,E2R0D6,E2R0G3,E2R0I8,E2R0J2,E2R0L9,E2R129,E2R1J6,E2R1S5,E2R2N2,E2R2P0,E2R3V7,E2R416,E2R498,E2R4A3,E2R5P4,E2R5Q5,E2R6E4,E2R6L1,E2R755,E2R771,E2R792,E2R7F1,E2R7P6,E2R7V4,E2R8A8,E2R8L3,E2R8R8,E2R8W7,E2R8Y3,E2R912,E2R…
biological_process	endoderm formation	B6V8E6,E2QTT8,E2QW13,F1P6H7,F1PCD8,F1PFM6,F1PMK7,F1PQL2,F1PUM6,F1PY05,F1Q129
biological_process	interaction with host	E2QZN8,E2R0L9,E2R6Q7,E2R9E3,E2RAT8,E2RL20,E2RRB7,F1P9H9,F1PAM9,F1PGV4,F1PL97,F1PSX9,F1Q2U8,F6UT62,F6XEL1,F6Y3P9,Q5WR10,Q9TSZ6
biological_process	response to acid	E2QXN9,E2RF06,F1PCV7,F1PF03,F1PFM6,F1PG08,F1PHY1,F1PMK7,F1PZP6,F1Q133,F1Q235,F1Q3I5,J9NY23
biological_process	response to amino acid stimulus	E2QXN9,E2RF06,F1PCV7,F1PF03,F1PFM6,F1PG08,F1PHY1,F1PMK7,F1PZP6,F1Q133,F1Q235,F1Q3I5,J9NY23
biological_process	negative regulation of macromolecule metabolic process	A2SXS5,B6V8E6,E2QRQ8,E2QRX1,E2QS13,E2QT82,E2QTC7,E2QUR2,E2QV07,E2QWM9,E2QX33,E2QX86,E2QXC6,E2QXD1,E2QXF2,E2QY30,E2QYK6,E2QYZ4,E2QZV2,E2QZV5,E2R030,E2R0G3,E2R0I8,E2R0J2,E2R0T6,E2R0X9,E2R2P0,E2R4A3,E2R5Q5,E2R792,E2R7R4,E2R8A8,E2R912,E2R990,E2RA06,E2RA27,E2RAG6,E2RAN6,E2RBU1,E2RCF2,E2RCH8,E2RCV4,E2RCZ7,E2RD72,E2RDZ4,E2REA8,E2REF0,E2RF39,E2RF98,E2RFW4,E2RGG9,E2RGJ1,E2RGR3,E2RH91,E2RKJ1,E2RL17,E2RLM4,…
biological_process	sarcomere organization	E2QUQ0,E2QY07,E2QY08,E2QZV5,E2RT60,F1P912,F1PIL5,F1PR93,F1PV45,F1Q0N9,J9P2G7,Z4YHI2
biological_process	organic cyclic compound catabolic process	E2QVU9,E2QWR3,E2QXS7,E2QY31,E2QYN4,E2R1J6,E2R412,E2R4N9,E2R513,E2R651,E2R7P6,E2R7S6,E2R8E3,E2R990,E2R9R1,E2RCI5,E2RDZ4,E2REH5,E2RFD6,E2RH09,E2RH91,E2RIM3,E2RKY4,E2RLQ9,E2RLU9,E2RNT3,E2RPH0,E2RPH1,E2RPS7,E2RRC6,E2RRF8,E2RS63,E2RT60,F1P6C1,F1P9S5,F1PA22,F1PBG7,F1PDH7,F1PEA6,F1PI20,F1PJ65,F1PJ74,F1PKY3,F1PLR0,F1PPB6,F1PQM1,F1PQZ7,F1PSV4,F1Q1B1,F1Q3Y0,F1Q462,F1Q4B4,F6V9Q0,F6XAE9,F6Y140,H9GWE2,J9JHU4,…
biological_process	positive regulation of mRNA processing	E2R068,E2R6E4,E2R771,E2R7P6,E2R8L3,E2R990,F1PC59,F1PQZ7,F6V5G7,J9P326
biological_process	interspecies interaction between organisms	E2QZN8,E2R0L9,E2R6Q7,E2R9E3,E2RAT8,E2REK6,E2RL20,E2RRB7,F1P6H7,F1P7V2,F1P9H9,F1PAM9,F1PGV4,F1PL97,F1PSX9,F1Q2U8,F1Q4F1,F6UT62,F6XEL1,F6Y3P9,J9NSF9,Q5WR10,Q6TEQ7,Q9TSZ6
biological_process	symbiosis, encompassing mutualism through parasitism	E2QZN8,E2R0L9,E2R6Q7,E2R9E3,E2RAT8,E2REK6,E2RL20,E2RRB7,F1P6H7,F1P7V2,F1P9H9,F1PAM9,F1PGV4,F1PL97,F1PSX9,F1Q2U8,F1Q4F1,F6UT62,F6XEL1,F6Y3P9,J9NSF9,Q5WR10,Q6TEQ7,Q9TSZ6
biological_process	transforming growth factor beta receptor signaling pathway	A2SXS5,E2QUV7,E2RBU1,E2RBW8,E2RCF2,E2RFW4,E2RRN8,E2RSS4,E2RTE0,F1P6C1,F1P7F8,F1PAY5,F1PBI6,F1PFB4,F1PHY1,F1PIA3,F1PIC7,F1PKH2,F1PKR0,F1PLA1,F1PM26,F1PUT6,J9NRV4,J9P2L4
biological_process	regulation of biological process	A0A0A0MPC5,A0A0A0MPD6,A0A0B4J195,A0A0B5CXY9,A0A140T8E0,A0A140T8E2,A0M8U6,A0M8V0,A1DZY5,A2SXS5,A4GT58,A6Q0K4,B4YY02,B6V8E6,D3YJ60,D5IGD0,E2QRQ8,E2QRV2,E2QRX1,E2QS13,E2QS34,E2QSB9,E2QSE3,E2QT82,E2QTC7,E2QTL3,E2QTN0,E2QTP7,E2QTX0,E2QUE7,E2QUG4,E2QUI7,E2QUK0,E2QUQ0,E2QUR2,E2QUR8,E2QUU5,E2QUV3,E2QUV7,E2QUY2,E2QUY7,E2QV07,E2QVF9,E2QVG1,E2QVN6,E2QVP6,E2QW13,E2QW54,E2QW90,E2QWD1,E2QWD3,E2QWE0,E2QWE2,E2QW…
biological_process	positive regulation of cell cycle phase transition	E2QWL1,E2QWR3,E2RGJ1,E2RRC6,E2RTD3,F1P6B7,F1PF03,F1PL90,F1PNF3,F1PPQ3,F1PSX9,F1PU58,P62490
biological_process	positive regulation of metabolic process	A0A0A0MPD6,B6V8E6,D3YJ60,E2QRV2,E2QRX1,E2QS13,E2QSE3,E2QTX0,E2QUE7,E2QUK0,E2QUR8,E2QUV7,E2QVF9,E2QW13,E2QWE0,E2QWE3,E2QWM5,E2QXM7,E2QXY7,E2QY30,E2QYH6,E2QYU2,E2QZB3,E2QZN8,E2QZV2,E2R030,E2R068,E2R0D6,E2R0G3,E2R0I8,E2R0J2,E2R0L9,E2R129,E2R1J6,E2R1S5,E2R2N2,E2R2P0,E2R3V7,E2R416,E2R498,E2R4A3,E2R5P4,E2R5Q5,E2R6E4,E2R6L1,E2R755,E2R771,E2R792,E2R7F1,E2R7P6,E2R7V4,E2R8A8,E2R8L3,E2R8R8,E2R8W7,E2R8Y3,E2R…
biological_process	positive regulation of reproductive process	B6V8E6,E2QTC7,E2QW13,E2R198,E2R412,E2R9E3,E2RNT3,E2RRB7,F1P9H9,F1PHT0,F1PL90,F1PL97,F1PQZ7,F1PR95,F1PTL1,F1Q2U8,J9P326,J9P7U8
biological_process	chaperone mediated protein folding requiring cofactor	E2R0T6,E2RAU5,E2RMC1,E2RNW5,F1PIC7,F6V735,G1K268,H9GW49,J9NU25
biological_process	muscle cell differentiation	A0A0A0MPD6,A0A140T8E2,B6V8E6,E2QSE3,E2QUK0,E2QUQ0,E2QWL1,E2QWM5,E2QY07,E2QY08,E2QZV5,E2R030,E2R1C9,E2R4A3,E2R4J1,E2R7Z2,E2REA8,E2RFV8,E2RHY8,E2RJE0,E2RP26,E2RSS4,E2RT60,E2RTD3,F1P912,F1P9J3,F1PEC4,F1PEQ5,F1PER7,F1PIL5,F1PJ63,F1PL90,F1PNP7,F1PPA1,F1PQL2,F1PR93,F1PSK6,F1PV45,F1PVV7,F1Q0N9,F1Q133,F2Z4P5,F6X6W7,F6XVD7,J9P2G7,J9P3K0,J9P4N7,J9PAS5,O02812,Z4YHI2
biological_process	nucleoside monophosphate biosynthetic process	E2QYQ0,E2R3Y5,E2RGK2,E2RRF8,F1PKY3,F1PPT7,F1PX39,F1Q4F5,F6UXI8,J9NVT2,J9P7I4
biological_process	regulation of leukocyte migration	E2QWD3,E2QXF2,E2R755,E2R7F1,E2RAI8,E2RF98,E2RFV8,E2RJT2,E2RSP4,F1P6B7,F1P9B2,F1P9E5,F1PKY3,F1PL90,F1PR95,F1PUI4,F1PYK5,F1PYQ1,F6PME1,F6XY66,J9P4N7,O02812,Q06220,Q6YKA4
biological_process	embryo development	A0A140T8E2,A6Q0K4,B6V8E6,E2QSE3,E2QTT8,E2QUK0,E2QUV7,E2QVG1,E2QW13,E2QY31,E2QYZ4,E2QZV5,E2R030,E2R0R3,E2R2C3,E2R2N2,E2R311,E2R4A3,E2R543,E2R612,E2R755,E2R7J9,E2R8A8,E2R8L3,E2RAA0,E2RB34,E2RBD1,E2RBZ1,E2RD70,E2RD72,E2RDB1,E2RDZ4,E2REA8,E2RGF3,E2RH48,E2RIY4,E2RJH2,E2RJL3,E2RJW9,E2RKK6,E2RSG8,E2RT60,E2RTE0,E2RTL4,F1P6H7,F1P7Z9,F1P912,F1P9J3,F1P9S5,F1PAT6,F1PAY5,F1PB28,F1PBK7,F1PBX0,F1PCD8,F1PDJ5,F1P…
biological_process	oxidoreduction coenzyme metabolic process	A0A0A0MPD3,E2QUI9,E2QV08,E2R0I9,E2RLQ6,E2RLQ9,E2RT65,F1P6K2,F1PE09,F1PQM1,F1PZA1,F6V404,H9GW87,J9NU72,J9NZX7
biological_process	regulation of protein transport	E2QRX1,E2QS13,E2QTC7,E2QTL3,E2QWM5,E2QWN7,E2R057,E2R0D2,E2R2C3,E2R3V7,E2R792,E2R912,E2R9K4,E2RA27,E2RF06,E2RFW4,E2RKR1,E2RNT3,E2RSI6,E2RSP4,F1P6B7,F1P6H7,F1PAT6,F1PAY5,F1PB28,F1PDJ5,F1PKH2,F1PKW7,F1PLR0,F1PLS0,F1PS57,F1PUN9,F1PVV7,F1PWW0,F1Q147,F1Q3J6,F6UT62,F6UV28,F6X8E7,J9NXT9,J9NZ28,J9P0D5,J9P249,J9P4L2,J9P4N7,O02812,P62825,Q6YKA4
biological_process	positive regulation of response to stimulus	A2SXS5,B6V8E6,D3YJ60,E2QRV2,E2QRX1,E2QS13,E2QSE3,E2QTL3,E2QUV7,E2QW13,E2QW90,E2QXF2,E2QY30,E2QY31,E2QYZ4,E2QZN3,E2R030,E2R0D6,E2R1C9,E2R1M6,E2R2K4,E2R2N2,E2R2P0,E2R3V7,E2R4I1,E2R4Q2,E2R5P4,E2R755,E2R792,E2R7V4,E2R912,E2R9P2,E2R9S7,E2RAA0,E2RAI8,E2RBJ1,E2RCY1,E2REK6,E2RF98,E2RFV8,E2RFW4,E2RGF3,E2RH47,E2RJH2,E2RKJ1,E2RLF1,E2RLQ9,E2RN02,E2RN10,E2RNC5,E2RNE1,E2RNT3,E2RPC0,E2RQC9,E2RS79,E2RSI6,E2RSP4,…
biological_process	apoptotic signaling pathway	A1DZY5,A6Q0K4,B6V8E6,E2QRQ8,E2QS13,E2QTL3,E2QW13,E2QY30,E2QYN4,E2R4I1,E2R912,E2R9S7,E2RA27,E2RC33,E2RCI8,E2RE67,E2RFI6,E2RGF3,E2RH47,E2RIQ2,E2RNC5,E2RNW5,E2RPJ4,E2RPY9,E2RSM4,F1P7D3,F1PBI6,F1PCG4,F1PEA6,F1PIK5,F1PKH2,F1PLR0,F1PQX4,F1PRL5,F1PUI4,F1PX75,F1PYN7,F1PZ83,F1Q260,F1Q2L2,F1Q4K1,F6PME1,F6UMY5,F6XCS5,F6Y3P9,J9NRM1,J9NS50,J9P249,J9P7X5,Q06220,Q9GL21
biological_process	cytoplasmic translational initiation	E2QWG8,E2REK3,E2RSR5,F6UN31,J9NSD0
biological_process	regulation of viral reproduction	E2QTC7,E2QZN8,E2R198,E2R3V7,E2R412,E2R9E3,E2RGE0,E2RNT3,E2RRB7,F1P9H9,F1PGB6,F1PHT0,F1PL97,F1PTL1,F1Q2U8,F6UT62,F6Y3P9,J9P326,J9P7U8,P18067
biological_process	regulation of wound healing	E2QWD3,E2R886,E2RQ14,F1P6B7,F1PBI6,F1PCG4,F1PJ74,F1PM26,F1PQM7,F1PSS8,F1PST8,F1PTE0,F1PUI4,F1PYX9,F6URU8,F6Y2H4,J9NSF9,Q6TEQ7
biological_process	regulation of mitotic cell cycle	B6V8E6,E2QRV2,E2QUE7,E2QV07,E2QWL1,E2QWR3,E2QXF2,E2R1Z0,E2R2P0,E2R9E3,E2RA06,E2RCZ7,E2RD72,E2RF46,E2RGF3,E2RGJ1,E2RGR3,E2RH71,E2RPY9,E2RRC6,E2RTD3,F1P6B7,F1PCF0,F1PD77,F1PED7,F1PF03,F1PGD7,F1PGY9,F1PJ65,F1PL90,F1PNF3,F1PPQ3,F1PQX4,F1PRK3,F1PSC3,F1PST8,F1PSX9,F1PU58,F1PWN6,F1PYN7,F1Q3J6,F6UV28,F6UY11,F6V322,G1K268,J9NRM1,J9P3T9,J9P9V1,P60952,P62490,Q3YIX4
biological_process	positive regulation of RNA splicing	E2R068,E2R0G3,E2R6E4,E2R771,E2R7P6,E2R8L3,F1PB28,F1PC59,F6V5G7
biological_process	lysosomal transport	E2QWE3,E2R446,E2RAT8,E2RHA6,E2RHN1,E2RLF1,E2RPG3,F1PGG9,F1PJ63,F1PN76,F1PQQ3,F1PZP6,F1Q260,P18067
biological_process	regulation of transmembrane receptor protein serine/threonine kinase signaling pathway	A2SXS5,E2QUV7,E2QVG1,E2QW13,E2R030,E2R5P4,E2RAA0,E2RBU1,E2RBW8,E2RCF2,E2RF76,E2RFW4,E2RRN8,E2RSS4,E2RTE0,F1P6C1,F1PAY5,F1PBI6,F1PIA3,F1PIC7,F1PKH2,F1PKR0,F1PLA1,F1PM26,F1PM34,F1PQL2,J9NRV4,J9P2L4,J9P4N7,Q32KH2
biological_process	viral genome replication	E2QTC7,E2R198,E2R3V7,E2R412,E2R9E3,E2RGE0,E2RLQ9,E2RRB7,F1PGB6,F1PHT0,F1PTL1,J9NXZ3,J9P326,J9P7U8
biological_process	positive regulation of substrate adhesion-dependent cell spreading	E2QWD3,E2RF98,F1PAG6,F1PDJ5,F1PR95,F1PWW0,F1PYQ1,P60952
biological_process	cofactor metabolic process	A0A0A0MPD3,E2QU97,E2QUI9,E2QV08,E2QVU9,E2QWC1,E2QXS7,E2QYN4,E2R0I9,E2R1U9,E2R431,E2R4L7,E2R513,E2R7C2,E2RGM9,E2RLQ6,E2RLQ9,E2RLU9,E2RT65,E2RTD6,F1P6K2,F1PE09,F1PQM1,F1PTP2,F1PU84,F1PW12,F1PZA0,F1PZA1,F6V404,H9GW87,J9NS37,J9NU72,J9NZX7,J9P5E0
biological_process	protein oxidation	E2QS13,E2QYZ4,E2RCV4,F1PDJ5,J9NVY4,J9NZK5
biological_process	regulation of RNA polymerase II transcriptional preinitiation complex assembly	E2RH48,E2RTD3,F1PBK7,F1PPH7,J9P1N0,Q6YKA4
biological_process	ruffle assembly	E2QUI7,E2QWR3,E2R7V4,E2RRC6,F1PA22,F1PPW5,F1PYQ1,F1Q1Q0,F1Q3Y0,H9GW54
biological_process	negative regulation of translation	E2QUR2,E2R5Q5,E2R990,E2RDZ4,E2RL17,F1PEQ5,F1PGB6,F1PHT0,F1PQZ7,F1PSC3,F1Q0B0,F1Q0Z5,F1Q2U8,F6UV28,F6XIK8,F6XXD6
biological_process	ruffle organization	E2QUI7,E2QW54,E2QWR3,E2R7V4,E2RRC6,F1PA22,F1PPW5,F1PYQ1,F1Q1Q0,F1Q3Y0,H9GW54
biological_process	spliceosomal snRNP assembly	E2QXZ2,E2R4X9,E2R8L3,E2RBU1,E2RIW7,E2RQ80,F1PDH7,F1PSI7,J9P061,J9P098,K9J6N9
biological_process	regulation of microtubule cytoskeleton organization	B6V8E6,E2QRV2,E2QV07,E2QWR3,E2QY31,E2R2P0,E2R9K4,E2RDE0,E2RFV2,E2RGR3,E2RNX1,E2RQW2,E2RTB1,F1PE53,F1PED7,F1PFG6,F1PGY9,F1PN67,F1PWN6,F1PYQ1,F6UV28,F6XQD6,F6XY66,F6Y5Z5,G1K268,J9NVP2,J9P3T9,P60952
biological_process	cellular nitrogen compound metabolic process	A0A0A0MPC5,A0A0A0MPD3,A0A0A0MPD6,A2SXS5,B4YY02,B6V8E6,E2QRQ8,E2QRR5,E2QS13,E2QS34,E2QSE3,E2QTC7,E2QTX0,E2QU31,E2QU97,E2QUE2,E2QUE7,E2QUI9,E2QUJ4,E2QUK0,E2QUR2,E2QUR8,E2QUV7,E2QV07,E2QV08,E2QV97,E2QVG1,E2QVN6,E2QVU9,E2QW13,E2QW27,E2QWC1,E2QWE0,E2QWM5,E2QWR3,E2QX33,E2QX53,E2QX69,E2QX86,E2QXC6,E2QXI3,E2QXM7,E2QXR8,E2QXS7,E2QXU4,E2QXY7,E2QXZ2,E2QY30,E2QY31,E2QYG6,E2QYH6,E2QYJ4,E2QYK6,E2QYN4,E2QYQ0,E2…
biological_process	positive regulation of cell communication	A2SXS5,B6V8E6,D3YJ60,E2QRV2,E2QRX1,E2QSE3,E2QTL3,E2QTN0,E2QUV7,E2QW13,E2QW90,E2QXF2,E2QY31,E2QYZ4,E2R030,E2R1C9,E2R2K4,E2R2N2,E2R2P0,E2R3V7,E2R4I1,E2R5P4,E2R792,E2R7V4,E2R9P2,E2R9S7,E2RAA0,E2REK6,E2RF98,E2RFV8,E2RFW4,E2RGF3,E2RH47,E2RJH2,E2RKJ1,E2RLF1,E2RLQ9,E2RN02,E2RNC5,E2RNE1,E2RQC9,E2RSP4,E2RT60,E2RTD3,E2RTE0,F1P6C1,F1P774,F1P7V2,F1P9H9,F1PAY5,F1PBI6,F1PCG4,F1PCV7,F1PDJ5,F1PE38,F1PEA6,F1PEC4,…
biological_process	negative regulation of MAPK cascade	A2SXS5,E2QRQ8,E2QXM7,E2QY31,E2R0I8,E2R2P0,E2R792,E2RCF2,E2RD72,E2RGF3,E2RSI6,F1P6C1,F1PAY5,F1PJ74,F1PLV6,F6V322,F6XVD7,J9P6D6,Q3YIX4,Q9TSZ6
biological_process	maintenance of protein location	E2QWR3,E2QXA5,E2RGD3,E2RIL1,E2RRW0,E2RSC5,F1PER7,F1PFK0,F1PIA3,F1PIC7,F1PKW7,F1PLA1,F1PQQ3,F1PRK3,F1PSC2,F1PWW0,F6V7F8,F6Y3P9,J9NXT9,J9P127,J9P249,P60952,Q9TSZ6
biological_process	tissue migration	E2QXF2,E2R030,E2R2C3,E2R912,E2RA06,E2RBU1,E2RCV4,E2RD94,E2RMA3,E2RT60,F1P6B7,F1P9J3,F1PA22,F1PBI6,F1PDJ5,F1PE38,F1PE53,F1PJ74,F1PKH2,F1PST8,F1PSX9,F1PUT6,F1PWK3,F1PYE3,F1Q1H3,F1Q1Q0,F1Q3Y0,F2Z4N0,F6X8E7,F6XY66,J9P4N7,P62490,Q29393,Q6YKA4
biological_process	alpha-amino acid biosynthetic process	A0A0B4J195,E2QU97,E2QXN9,E2R3N2,E2R4L7,E2R7C2,E2RDN1,E2RF46,E2RPN5,E2RTL4,F1PFD8,F1PHM4,F1PY28,F1PZL5,J9NS37,J9P5I1
biological_process	regulation of cellular localization	A4GT58,B6V8E6,E2QRX1,E2QS13,E2QTC7,E2QTL3,E2QUQ0,E2QW13,E2QWM5,E2QWN7,E2QWR3,E2QYN4,E2R057,E2R0D2,E2R2C3,E2R2K4,E2R3V7,E2R4A3,E2R792,E2R7F1,E2R812,E2R9K4,E2RA27,E2RAT8,E2RE87,E2REK6,E2RF06,E2RFW4,E2RKR1,E2RNB6,E2RNT3,E2RPG3,E2RQE7,E2RRC6,E2RSI6,E2RSP4,E2RSU6,F1P6B7,F1P6C1,F1P6H7,F1PA22,F1PAT6,F1PAY5,F1PB28,F1PDJ5,F1PEH0,F1PFR1,F1PGY9,F1PGZ1,F1PIL5,F1PJM7,F1PKH2,F1PL90,F1PLD5,F1PLR0,F1PNP7,F1PQ58,…
biological_process	IMP metabolic process	E2R3Y5,E2RF16,E2RGK2,F1PPT7,F1Q4F5,J9NVT2,J9P7I4
biological_process	positive regulation of mRNA splicing, via spliceosome	E2R068,E2R6E4,E2R771,E2R7P6,E2R8L3,F1PC59,F6V5G7
biological_process	dephosphorylation	E2QWJ6,E2QYD0,E2R095,E2R0I8,E2R1M6,E2R1U9,E2R7V4,E2R912,E2RAN6,E2REK6,E2RFB4,E2RI72,E2RPN5,E2RR79,E2RSU6,F1P8N6,F1P9S0,F1PD37,F1PDA7,F1PE53,F1PJ65,F1PKH2,F1PKW7,F1PU60,F1PX75,F6UMY5,F6V322,F6XJB3,J9NSU1,J9P332,J9P6D6,J9P7W8,J9P7X5,Q6QNF3
biological_process	monosaccharide catabolic process	A0A0A0MPD0,E2R0I9,E2R1S5,E2R2C3,E2RAN6,E2RAS8,E2RFC5,E2RLQ6,E2RRC9,E2RT65,F1PBT3,F1PE09,F1PHR2,F1PK43,F1PS82,F1PTZ9,F1PUL4,F6V404,H9GW87,J9NU72,J9P687,J9PBL1
biological_process	negative regulation of protein modification process	A2SXS5,B6V8E6,E2QS13,E2QZV5,E2R030,E2R0G3,E2R0I8,E2R0X9,E2R2P0,E2R4A3,E2R8A8,E2R912,E2RAG6,E2RBU1,E2RCF2,E2RCH8,E2RCZ7,E2RF39,E2RF98,E2RGG9,E2RM91,E2RPJ4,E2RQW2,E2RRD1,E2RSU6,F1P914,F1PEQ7,F1PIA2,F1PJ74,F1PKU3,F1PKW7,F1PLR0,F1PM26,F1PNF3,F1PQL2,F1PRR3,F1PS57,F1Q1Q0,F6UMY5,F6V322,F6XVD7,J9NVT9,J9P6D6
biological_process	transmembrane receptor protein serine/threonine kinase signaling pathway	A2SXS5,E2QUV7,E2QVG1,E2QW13,E2R030,E2R5P4,E2RAA0,E2RBU1,E2RBW8,E2RCF2,E2RF76,E2RFW4,E2RJE0,E2RRN8,E2RSS4,E2RTE0,F1P6C1,F1P7F8,F1PAY5,F1PBI6,F1PEA6,F1PFB4,F1PHY1,F1PIA3,F1PIC7,F1PKH2,F1PKR0,F1PLA1,F1PLS4,F1PM26,F1PM34,F1PQL2,F1PUT6,F1PXN2,J9NRV4,J9P2L4,J9P4N7,O02812,Q32KH2
biological_process	cellular response to topologically incorrect protein	E2R0T6,E2RA27,E2RAU5,E2RLQ9,E2RNW5,E2RR16,F1PIC7,F1PPQ3,F1PU58,F6V322,F6V735,G1K268,H9GW49,J9NRV4,J9NU25,J9P095
biological_process	regulation of G1/S transition of mitotic cell cycle	E2QUE7,E2R1Z0,E2RA06,E2RGJ1,E2RPY9,E2RRC6,F1P6B7,F1PCF0,F1PD77,F1PF03,F1PL90,F1PNF3,F1PPQ3,F1PQX4,F1PSX9,F6UY11
biological_process	organelle localization	E2QTN0,E2QXY7,E2QY31,E2QZ05,E2R1S5,E2R2P0,E2R812,E2R9K4,E2RD72,E2REP2,E2RGF3,E2RIL1,E2RSI6,E2RT72,E2RTB1,F1P679,F1P6V8,F1P9J3,F1PGY9,F1PIA4,F1PJ63,F1PQQ3,F1PRT4,F1PU58,F1PVV7,F1PVW6,F1PWN6,F1Q0H3,F1Q147,F1Q1H3,F2Z4Q6,F6X637,F6X725,F6XQD6,J9JHN1,P60952,P62490
biological_process	spliceosomal complex assembly	E2QZF6,E2R8L3,E2RC33,E2REJ7,E2RSS5,F1PKF6,F1PTE0,F1PV40,F6UQI5,K9J6N9,Q5WR10
biological_process	cellular response to organic nitrogen	A0A0B4J195,B6V8E6,E2QUR2,E2R2K4,E2R755,E2R9S7,E2REF0,E2RF06,E2RL11,E2RNE1,E2RQ14,E2RQL3,E2RSI6,E2RTD3,F1P8N6,F1P9H9,F1PCV7,F1PEQ5,F1PF03,F1PFM6,F1PG08,F1PHR2,F1PHT0,F1PHY1,F1PLS4,F1PMK7,F1PQC4,F1PUT6,F1PZE5,F1PZP6,F1Q133,F1Q147,F1Q235,F1Q2M3,F1Q3I5,F1Q3J6,F6V2H2,F6X8E7,J9NUV0,J9NY23,J9P9Z6
biological_process	regulation of establishment of protein localization	E2QRX1,E2QS13,E2QTC7,E2QTL3,E2QWM5,E2QWN7,E2R057,E2R0D2,E2R2C3,E2R3V7,E2R792,E2R912,E2R9K4,E2RA27,E2RF06,E2RFW4,E2RKR1,E2RNT3,E2RSI6,E2RSP4,F1P6B7,F1P6H7,F1PAT6,F1PAY5,F1PB28,F1PDJ5,F1PKH2,F1PKW7,F1PLR0,F1PLS0,F1PS57,F1PUN9,F1PVV7,F1PWW0,F1Q147,F1Q3J6,F6UT62,F6UV28,F6X8E7,J9NXT9,J9NZ28,J9P0D5,J9P249,J9P4L2,J9P4N7,O02812,P62825,Q6YKA4
biological_process	positive regulation of signaling	A2SXS5,B6V8E6,D3YJ60,E2QRV2,E2QRX1,E2QSE3,E2QTL3,E2QTN0,E2QUV7,E2QW13,E2QW90,E2QXF2,E2QY31,E2QYZ4,E2R030,E2R1C9,E2R2K4,E2R2N2,E2R2P0,E2R3V7,E2R4I1,E2R5P4,E2R792,E2R7V4,E2R9P2,E2R9S7,E2RAA0,E2REK6,E2RF98,E2RFV8,E2RFW4,E2RGF3,E2RH47,E2RJH2,E2RKJ1,E2RLF1,E2RLQ9,E2RNC5,E2RNE1,E2RQC9,E2RSP4,E2RT60,E2RTD3,E2RTE0,F1P6C1,F1P774,F1P7V2,F1P9H9,F1PAY5,F1PBI6,F1PCG4,F1PCV7,F1PDJ5,F1PE38,F1PEA6,F1PEC4,F1PEH0,…
biological_process	positive regulation of RNA polymerase II transcriptional preinitiation complex assembly	E2RH48,E2RTD3,F1PBK7,F1PPH7,J9P1N0
biological_process	pyrimidine-containing compound metabolic process	E2QWC1,E2R1U9,E2R2N2,E2R8E3,E2RC20,E2RRF8,F1PIG2,F1PX39,F1Q4B4,J9P0J7,J9P266,J9P894,Q50KA9
biological_process	regulation of early endosome to late endosome transport	E2R7F1,E2RFW4,E2RRC6,E2RSI6,F6UT62
biological_process	regulation of endocytic recycling	A4GT58,E2QUQ0,F1PNP7,F1PSK6,J9JHN1
biological_process	response to inorganic substance	A6Q0K4,E2QS13,E2QXD1,E2QXF2,E2R2N2,E2R9N5,E2RAN6,E2RCV4,E2RE67,E2REK6,E2RHG2,E2RJW9,E2RN10,E2RNB6,E2RNL3,E2RP76,E2RQ14,F1P6B7,F1PAS8,F1PBI6,F1PC59,F1PCG4,F1PF03,F1PJ65,F1PQ58,F1PQX4,F1PV82,F1Q057,F1Q1H3,F1Q2D2,F1Q462,F2Z4P5,F6X958,J9NU72,J9P8G4,J9PAW2,O97758,Q3YIX4,Q8WNN6
biological_process	sequestering of actin monomers	E2QXA5,E2RGD3,F1PFK0,F6Y3P9,J9P127
biological_process	regulation of reproductive process	B6V8E6,E2QTC7,E2QW13,E2QZN8,E2R198,E2R3V7,E2R412,E2R9E3,E2RGE0,E2RNL3,E2RNT3,E2RRB7,F1P9H9,F1PGB6,F1PGZ1,F1PHT0,F1PKY3,F1PL90,F1PL97,F1PQS2,F1PQZ7,F1PR95,F1PTL1,F1Q2U8,F2Z4Q7,F6UT62,F6UWI0,F6Y3P9,J9P326,J9P7U8,Q32KH2
biological_process	regulation of cellular metabolic process	A0A0A0MPC5,A0A0A0MPD6,A2SXS5,B6V8E6,D3YJ60,E2QRQ8,E2QRV2,E2QS13,E2QS34,E2QSE3,E2QT82,E2QTC7,E2QTX0,E2QUE7,E2QUK0,E2QUR2,E2QUR8,E2QUV7,E2QV07,E2QVF9,E2QVG1,E2QVN6,E2QW13,E2QW90,E2QWE0,E2QWE3,E2QWJ6,E2QWM4,E2QWM5,E2QWM9,E2QWR3,E2QX33,E2QX86,E2QXC6,E2QXM7,E2QXN9,E2QXY7,E2QXZ2,E2QY30,E2QY31,E2QYH6,E2QYK6,E2QYN4,E2QYU2,E2QYZ4,E2QZB3,E2QZN8,E2QZV2,E2QZV5,E2R030,E2R068,E2R0D6,E2R0G3,E2R0I8,E2R0L9,E2R0T6…
biological_process	Golgi to vacuole transport	E2R446,E2RHA6,E2RPG3,F1PGG9,F1PN76,F1Q260
biological_process	negative regulation of RNA splicing	E2R0G3,F1PEZ0,F1PR95,F1PTE0,F1Q1K6,J9P2I8
biological_process	purine-containing compound salvage	E2QYQ0,E2R3Y5,F1PJV5,F1PKY3,J9NVT2,J9P5I1
biological_process	stress granule assembly	E2RL17,E2RN45,F1PGY9,F1PK74,F6XCI1,J9NZX6
biological_process	positive regulation of protein polymerization	E2QWU0,E2QXY7,E2R7V4,E2RD65,E2RD72,E2RIQ2,E2RMT4,F1P679,F1PA22,F1PAG6,F1PBG7,F1PJ63,F1PYQ1,F1Q3Y0,F6Y3P9,J9NV86,J9NWK4,J9P309,J9P9Z6
biological_process	monosaccharide metabolic process	A0A0A0MPD0,E2QV12,E2QW90,E2R0I9,E2R1S5,E2R2C3,E2R832,E2RAN6,E2RAS8,E2RFC5,E2RLQ6,E2RNE1,E2RPJ4,E2RRC9,E2RT65,F1PBT3,F1PE09,F1PEQ5,F1PGP3,F1PGZ1,F1PHR2,F1PK43,F1PKB2,F1PS82,F1PTZ9,F1PUL4,F1PUM3,F1PVL7,F1Q4D9,F6V2H2,F6V404,H9GW87,J9NU72,J9P324,J9P687,J9P9V1,J9PBL1,O02812,P48300
biological_process	protein oligomerization	A0A0A0MPD3,E2QRX1,E2QSE3,E2QTL3,E2QU31,E2QUQ0,E2QYU2,E2R0I8,E2R0Y4,E2R311,E2R431,E2R4L7,E2R543,E2RAN6,E2RC33,E2RCF2,E2RCI8,E2RFD0,E2RLQ9,E2RNB6,E2RQ14,F1P719,F1PAY5,F1PB08,F1PBG7,F1PBJ4,F1PFG6,F1PFM6,F1PGZ1,F1PHY1,F1PJ74,F1PLD5,F1PLR0,F1PPI5,F1PQX4,F1PRR4,F1PS21,F1PU09,F1PU84,F1PYN7,F1PZA0,F1Q3I5,F1Q3Y2,F2Z4Q6,F6V735,F6XFY9,G1K296,J9NZX7,J9P425,J9P969,Q6TEQ7
biological_process	regulation of DNA-dependent transcription, initiation	B6V8E6,E2RH48,E2RTD3,F1PBK7,F1PPH7,F6XCS5,F6Y016,J9P1N0,Q6YKA4
biological_process	regulation of apoptotic process	A1DZY5,A6Q0K4,B6V8E6,E2QRQ8,E2QS13,E2QTC7,E2QTL3,E2QW13,E2QWE0,E2QXA6,E2QXF2,E2QXM7,E2QY30,E2QYN4,E2QYU2,E2R030,E2R0L9,E2R0V0,E2R2P0,E2R4I1,E2R543,E2R5P4,E2R912,E2R9E3,E2R9S7,E2RA27,E2RAA0,E2RC33,E2RD94,E2RF46,E2RFF1,E2RFW4,E2RGF3,E2RH47,E2RHB3,E2RHN1,E2RIQ2,E2RJE0,E2RKJ1,E2RLQ9,E2RNB6,E2RNC5,E2RPJ4,E2RPY9,E2RQ14,E2RR68,E2RSA6,E2RT60,E2RTD3,E2RTJ0,F1P6B7,F1P774,F1P7C2,F1P7D3,F1P8N6,F1PB28,F1PBI6,…
biological_process	response to endoplasmic reticulum stress	E2QSE3,E2QZV2,E2R7L1,E2RB31,E2RD86,E2RHJ7,E2RL17,E2RM60,E2RNW5,F1PIC7,F1PL97,F1PPQ3,F1Q2H2,F6V322,F6X958,J9NRV4,J9NU25,J9P095,J9P332
biological_process	cellular nitrogen compound catabolic process	E2QVU9,E2QWR3,E2QXS7,E2QY31,E2QYN4,E2R1J6,E2R412,E2R4N9,E2R513,E2R651,E2R7P6,E2R7S6,E2R8E3,E2R990,E2R9R1,E2RCI5,E2RDZ4,E2RFD6,E2RH09,E2RH91,E2RIM3,E2RKY4,E2RLQ9,E2RNT3,E2RPH0,E2RPH1,E2RPS7,E2RRC6,E2RRF8,E2RT60,F1P6C1,F1P9S5,F1PA22,F1PBG7,F1PDH7,F1PEA6,F1PI20,F1PJ65,F1PKY3,F1PLR0,F1PPB6,F1PQM1,F1PQZ7,F1PSV4,F1Q1B1,F1Q3Y0,F1Q462,F1Q4B4,F6V9Q0,F6XAE9,F6Y140,H9GWE2,J9JHU4,J9NS50,J9NY44,J9P326,J9P3T9
biological_process	intermediate filament cytoskeleton organization	E2RKR1,E2RNM4,F1PHS5,F1PLS4,F1Q462,F6V735,J9P0W8,J9PAW7,L7N094,Q5XFN2
biological_process	regulation of protein processing	F1PAT6,F1PBI6,F1PCH3,F1PR95,F1PUI4,F1PYX9,F6UME0,F6UWI0,F6Y2H4,J9P4C5,Q6TEQ7
biological_process	spindle assembly involved in mitosis	E2QV07,E2RGR3,F1PRK3,F1PWW0,F6UV28,F6X637,F6XY66,G1K268,J9P3N0,J9P9X3,P62490
biological_process	peptidyl-lysine oxidation	E2QYZ4,E2RCV4,J9NVY4,J9NZK5
biological_process	epithelial cell migration	E2QXF2,E2R030,E2R2C3,E2R912,E2RA06,E2RBU1,E2RCV4,E2RD94,E2RMA3,E2RT60,F1P6B7,F1P9J3,F1PA22,F1PBI6,F1PDJ5,F1PE38,F1PE53,F1PJ74,F1PKH2,F1PST8,F1PSX9,F1PUT6,F1PWK3,F1PYE3,F1Q1H3,F1Q1Q0,F1Q3Y0,F6X8E7,F6XY66,J9P4N7,P62490,Q29393,Q6YKA4
biological_process	ATP biosynthetic process	E2RLQ9,F1PCH3,F1PDB4,F1Q2M3
biological_process	establishment of monopolar cell polarity	E2R7F1,E2RGF3,F1PHH3,F1PYU3,F6XQD6,F6XY66,P60952
biological_process	regulation of collagen metabolic process	E2RCF2,E2RD94,E2RT60,F1PLS4,J9NS29,J9NSF9,J9NYC0
biological_process	heterocycle catabolic process	E2QVU9,E2QWR3,E2QXS7,E2QY31,E2QYN4,E2R1J6,E2R412,E2R4N9,E2R513,E2R651,E2R7P6,E2R7S6,E2R8E3,E2R990,E2R9R1,E2RCI5,E2RDZ4,E2RFD6,E2RH09,E2RH91,E2RIM3,E2RKY4,E2RLQ9,E2RNT3,E2RPH0,E2RPH1,E2RPS7,E2RRC6,E2RRF8,E2RT60,F1P6C1,F1P9S5,F1PA22,F1PBG7,F1PDH7,F1PEA6,F1PI20,F1PJ65,F1PKY3,F1PLR0,F1PPB6,F1PQM1,F1PQZ7,F1PSV4,F1Q1B1,F1Q3Y0,F1Q462,F1Q4B4,F6V9Q0,F6XAE9,F6Y140,H9GWE2,J9JHU4,J9NS50,J9NY44,J9P326,J9P3T9
biological_process	epithelium migration	E2QXF2,E2R030,E2R2C3,E2R912,E2RA06,E2RBU1,E2RCV4,E2RD94,E2RMA3,E2RT60,F1P6B7,F1P9J3,F1PA22,F1PBI6,F1PDJ5,F1PE38,F1PE53,F1PJ74,F1PKH2,F1PST8,F1PSX9,F1PUT6,F1PWK3,F1PYE3,F1Q1H3,F1Q1Q0,F1Q3Y0,F6X8E7,F6XY66,J9P4N7,P62490,Q29393,Q6YKA4
biological_process	regulation of cell size	E2QSB9,E2R0R3,E2R0X9,E2R400,E2R7F1,E2RGD3,E2RGF3,E2RPE3,E2RRC6,F1P6H7,F1P9U4,F1PCV7,F1PYQ1,F1PZP6,F6XQD6,F6XY66,J9PAW7,P62490,Q863Z4
biological_process	aerobic respiration	A0A2Z5XAD4,A6Q0K4,E2QV08,E2RGR9,E2RR27,F1PV92,F1PYG8,F1PZA1,F1Q1X9
biological_process	organonitrogen compound catabolic process	A0A0B4J194,A0A0B4J195,E2QS94,E2QVU9,E2QWR3,E2QXS7,E2QY31,E2QYN4,E2R097,E2R0I8,E2R4L7,E2R4N9,E2R513,E2R599,E2R651,E2R857,E2R8E3,E2R9R1,E2RFD0,E2RFD6,E2RKY4,E2RLF1,E2RLQ9,E2RLU9,E2RNT3,E2RPH0,E2RPS7,E2RRC6,E2RRF8,E2RRW9,E2RS63,E2RT60,F1P6C1,F1P7M0,F1P9S5,F1PA22,F1PBG7,F1PBI2,F1PJ65,F1PKY3,F1PLR0,F1PPB6,F1PQM1,F1PRF8,F1PSX9,F1PWA9,F1Q3Y0,F1Q462,F1Q4B4,F6Y290,J9NS50,J9NSU7,J9P3T9,P79143,Z4YHH2
biological_process	maintenance of location	E2QWR3,E2QXA5,E2QY31,E2RC33,E2RCI8,E2REK6,E2RGD3,E2RIL1,E2RNW5,E2RQ14,E2RRW0,E2RSC5,F1PER7,F1PFK0,F1PIA3,F1PIC7,F1PIL5,F1PJ74,F1PKW7,F1PL90,F1PLA1,F1PQQ3,F1PRK3,F1PSC2,F1PUM3,F1PWW0,F1PZE5,F2Z4Q6,F6V7F8,F6Y3P9,J9JHK9,J9NSF9,J9NXT9,J9P127,J9P249,J9P5S0,P60952,Q9TSZ6
biological_process	regulation of cell cycle process	B6V8E6,E2QRV2,E2QUE7,E2QV07,E2QWL1,E2QWR3,E2R1Z0,E2R2P0,E2R8L3,E2R9E3,E2R9K4,E2RA06,E2RCZ7,E2RD94,E2REK6,E2RGJ1,E2RGR3,E2RH71,E2RH91,E2RKJ1,E2RMH8,E2RPY9,E2RQW2,E2RRC6,E2RTB1,E2RTD3,F1P6B7,F1P6C1,F1PAT6,F1PCF0,F1PD77,F1PE53,F1PED7,F1PF03,F1PFG6,F1PGD7,F1PGY9,F1PIK5,F1PJ63,F1PJM7,F1PL90,F1PNF3,F1PPQ3,F1PQX4,F1PRK3,F1PSX9,F1PU58,F1PWN6,F1PYN7,F1Q3J6,F6UV28,F6UWI0,F6UY11,F6V322,F6XY66,G1K268,J9P3T9,…
biological_process	ribonucleoside monophosphate biosynthetic process	E2QYQ0,E2R3Y5,E2RGK2,F1PKY3,F1PPT7,F1Q4F5,F6UXI8,J9NVT2,J9P7I4
biological_process	RNA export from nucleus	E2R4A3,E2RB34,E2RH09,E2RNT3,E2RPH1,E2RTB1,F1PLD5,F1PVE3,F1Q1K6,F2Z4N6,F6UV28,F6XEL1,J9P2A6,J9P851,P62825,Q5WR10
biological_process	protein export from nucleus	E2QS13,E2QWM5,E2R9K4,E2RA27,E2RAU5,F1PAT6,F1PUN9,F1Q3J6,J9NZ28,J9NZ53,P62825
biological_process	regulation of cell adhesion mediated by integrin	E2QSE3,E2QWD3,E2R912,E2RF98,F1P9B2,F1PKH2,F1PKY3,F1PUI4,F1PV78,F1Q3J6,Q863H1
biological_process	hexose catabolic process	A0A0A0MPD0,E2R0I9,E2R1S5,E2R2C3,E2RAN6,E2RAS8,E2RFC5,E2RLQ6,E2RRC9,E2RT65,F1PBT3,F1PE09,F1PHR2,F1PS82,F1PTZ9,F1PUL4,F6V404,H9GW87,J9NU72,J9P687,J9PBL1
biological_process	response to reactive oxygen species	A6Q0K4,E2QS13,E2R2N2,E2RHG2,E2RNB6,E2RNL3,F1P6B7,F1P912,F1PAS8,F1PC59,F1PCG4,F1PF03,F1PMK7,F1PQX4,F1PSX9,F1PUT6,F1Q057,F1Q462,F6X958,J9PAW2,Q8WNN6
biological_process	cortical cytoskeleton organization	E2QXY5,E2QY31,E2RD72,E2RSI6,F1PE53,F1PNP7,F1PR93,F1PSC2,F1PU60,F1Q0L3
biological_process	intermediate filament-based process	E2RKR1,E2RNM4,F1PHS5,F1PLS4,F1Q462,F6V735,J9P0W8,J9PAW7,L7N094,Q5XFN2
biological_process	vesicle coating	E2REP2,E2RPI9,E2RT72,F1PAM9,F1PB24,F1PHQ0,F1PU58,F1Q1H3,F6X5M3,J9NZJ6
biological_process	G1/S transition of mitotic cell cycle	E2QUE7,E2QW13,E2R1Z0,E2RA06,E2RGJ1,E2RPY9,E2RRC6,E2RT60,F1P6B7,F1PB28,F1PCF0,F1PD77,F1PF03,F1PL90,F1PNF3,F1PPQ3,F1PQX4,F1PSC3,F1PSX9,F2Z4P5,F6UY11
biological_process	interphase of mitotic cell cycle	E2QUE7,E2QW13,E2R1Z0,E2RA06,E2RGJ1,E2RPY9,E2RRC6,E2RT60,F1P6B7,F1PB28,F1PCF0,F1PD77,F1PF03,F1PL90,F1PNF3,F1PPQ3,F1PQX4,F1PSC3,F1PSX9,F2Z4P5,F6UY11
biological_process	transmembrane transport	B6V8E6,E2QS13,E2QUQ0,E2QUU5,E2QWD1,E2QYG6,E2R1R4,E2R1Z0,E2R236,E2RAC6,E2RAI8,E2RAZ6,E2RCI8,E2REK6,E2RFI6,E2RGF3,E2RGI4,E2RN91,E2RND5,E2RNW6,E2RPC0,E2RT63,F1PA33,F1PBI6,F1PDB4,F1PDJ5,F1PIL5,F1PJ63,F1PKI4,F1PLV7,F1PQQ4,F1PQX4,F1PR93,F1PS21,F1PUM3,F1PV82,F1PWW0,F1Q0Z5,F6PME1,F6X4P9,J9P6N4,J9P969,P33731,P61010,Q864L3
biological_process	positive regulation of G1/S transition of mitotic cell cycle	E2RGJ1,E2RRC6,F1P6B7,F1PF03,F1PL90,F1PNF3,F1PPQ3,F1PSX9
biological_process	regulation of programmed cell death	A1DZY5,A6Q0K4,B6V8E6,E2QRQ8,E2QS13,E2QTC7,E2QTL3,E2QW13,E2QWE0,E2QXA6,E2QXF2,E2QXM7,E2QY30,E2QYN4,E2QYU2,E2R030,E2R0L9,E2R0V0,E2R2P0,E2R4I1,E2R543,E2R5P4,E2R912,E2R9E3,E2R9S7,E2RA06,E2RA27,E2RAA0,E2RC33,E2RD94,E2RF46,E2RFF1,E2RFW4,E2RGF3,E2RH47,E2RHB3,E2RHN1,E2RIQ2,E2RJE0,E2RKJ1,E2RLQ9,E2RNB6,E2RNC5,E2RPJ4,E2RPY9,E2RQ14,E2RR68,E2RSA6,E2RT60,E2RTD3,E2RTJ0,F1P6B7,F1P774,F1P7C2,F1P7D3,F1P8N6,F1PB28,…
biological_process	negative regulation of phosphorylation	A2SXS5,E2QS13,E2QZV5,E2R030,E2R0I8,E2R0X9,E2R2P0,E2R412,E2R912,E2RBU1,E2RCF2,E2RCH8,E2RCZ7,E2RF98,E2RGG9,E2RK00,E2RM91,E2RQW2,E2RRD1,F1P914,F1PJ74,F1PKU3,F1PLR0,F1PM26,F1PNF3,F1PQL2,F1PRR3,F1Q1Q0,F6V322,F6XVD7,F6XY66,J9P6D6
biological_process	establishment or maintenance of monopolar cell polarity	E2R7F1,E2RGF3,F1PHH3,F1PYU3,F6XQD6,F6XY66,P60952
biological_process	positive regulation of viral reproduction	E2QTC7,E2R198,E2R412,E2R9E3,E2RNT3,E2RRB7,F1P9H9,F1PHT0,F1PL97,F1PTL1,J9P326,J9P7U8,P18067
biological_process	negative regulation of hemostasis	E2R886,E2RJE0,E2RQ14,F1PBI6,F1PJ74,F1PSS8,F1PUI4,J9NSF9,Q6TEQ7
biological_process	cell-cell recognition	E2QXF0,E2R0L9,E2R7F1,E2RB79,E2RD72,E2RRJ3,F1PGZ1,F1PQM7,F1Q331,F6V0D8
biological_process	positive regulation of growth	A6Q0K4,E2QWM4,E2R912,E2RGD3,E2RIM3,E2RND5,E2RPE3,E2RSI6,E2RTD3,F1P6H7,F1PB28,F1PF03,F1PKH2,F1PL90,F1PNF3,F1PSX9,F1PYK5,F1Q225,F1Q4F1,F6XQD6,J9NSF9,J9PAW7,P62490,Q863Z4
biological_process	cell projection assembly	E2QUI7,E2QUQ0,E2QWE2,E2QWR3,E2R1X9,E2R498,E2R4N9,E2R7V4,E2RGD3,E2RGF3,E2RIQ2,E2RK00,E2RR96,E2RRC6,E2RSI6,F1PA22,F1PAG6,F1PE38,F1PFK0,F1PPW5,F1PQS3,F1PU60,F1PVV7,F1PYQ1,F1PYU3,F1Q1Q0,F1Q2U8,F1Q3Y0,F1Q3Y2,H9GW54,J9NV14,J9NWK4,J9P4F3,P60952
biological_process	signaling	A0A0B4J195,A0A0B5CXY9,A0A140T8E2,A1DZY5,A2SXS5,A4GT58,A6Q0K4,B6V8E6,D3YJ60,E2QRQ8,E2QRV2,E2QRX1,E2QS13,E2QSE3,E2QTL3,E2QTN0,E2QTP7,E2QTX0,E2QUE7,E2QUG4,E2QUI7,E2QUQ0,E2QUR8,E2QUV7,E2QVG1,E2QVP6,E2QW13,E2QW90,E2QWD3,E2QWE0,E2QWE2,E2QWE3,E2QWF5,E2QWJ6,E2QWM4,E2QWM5,E2QWN7,E2QWR3,E2QXF2,E2QXM7,E2QXN9,E2QY30,E2QY31,E2QYH6,E2QYN4,E2QYU2,E2QYZ4,E2QZN3,E2QZV2,E2QZV5,E2QZX7,E2R030,E2R0I8,E2R0J2,E2R0R3,E2…
biological_process	regulation of cell development	A0A140T8E0,B6V8E6,E2QSB9,E2QSE3,E2QVP6,E2QWD3,E2QWM5,E2QWR3,E2QY30,E2QY31,E2QYZ4,E2R030,E2R0R3,E2R400,E2R498,E2R7S6,E2R7Z2,E2R8C0,E2R990,E2R9S7,E2RAG6,E2RBU1,E2RCV4,E2RF98,E2RFV8,E2RFW4,E2RGD3,E2RH70,E2RHN1,E2RKK6,E2RLM4,E2RN10,E2RPE3,E2RQV6,E2RR01,E2RRN8,E2RTE0,F1P6B7,F1P6H7,F1P9S5,F1P9U4,F1PAG6,F1PAY5,F1PCG4,F1PDJ5,F1PEC4,F1PFK0,F1PGG9,F1PGV4,F1PHH3,F1PIA3,F1PJ63,F1PJ74,F1PKH2,F1PKY3,F1PL90,F1P…
biological_process	negative regulation of ion transmembrane transporter activity	E2QUQ0,E2RAI8,E2REK6,E2RGF3,E2RPC0,F1PQQ4,F1PUM3,F1PV82
biological_process	positive regulation of protein catabolic process	E2QXM7,E2QYU2,E2QZB3,E2QZV2,E2R0I8,E2R0J2,E2R8Y3,E2R9E3,E2RFW4,E2RLQ9,E2RPJ4,E2RQA6,F1P9P5,F1PBG7,F1PJ74,F1PLR0,F1PM34,F1PTL1,F1PV82,G1K268,J9NRV4,J9P4C5,P18067
biological_process	organophosphate metabolic process	A0A0A0MPD0,A0A0A0MPD3,B4YY02,E2QUI9,E2QV08,E2QWC1,E2QWR3,E2QX53,E2QY31,E2QYG6,E2QYN4,E2QYQ0,E2QZ13,E2R095,E2R0I9,E2R0T6,E2R1E3,E2R1U9,E2R2C3,E2R311,E2R3Y5,E2R4N9,E2R507,E2R5R9,E2R5Z9,E2R651,E2R832,E2R8E3,E2R9R1,E2RAC6,E2RAM9,E2RAN6,E2RC20,E2RE39,E2RF16,E2RFD6,E2RGK2,E2RGM9,E2RH59,E2RJW5,E2RKY4,E2RLQ6,E2RLQ9,E2RM30,E2RNT3,E2RPH0,E2RPS7,E2RRC6,E2RRF8,E2RSP4,E2RT60,E2RT65,F1P6C1,F1P6K2,F1P797,F1P7Z9…
biological_process	positive regulation of actin filament bundle assembly	E2R7V4,E2R912,F1P9B2,F1PA22,F1PDJ5,F1PE53,F1PUT6,F1PYQ1,F1Q3Y0,F6XY66,J9NTX8
biological_process	mesenchymal cell development	B6V8E6,E2QYZ4,E2R030,E2R0R3,E2R2N2,E2R400,E2R7J9,E2RBD1,E2RBU1,E2RCI8,E2RCV4,E2RFW4,E2RJ14,E2RRN8,E2RTE0,F1P6H7,F1PAY5,F1PEA6,F1PKH2,F1Q1H3,F1Q1Q0,F1Q3I5,F6UXL3,Q06220,Q9TSZ6
biological_process	regulation of cell cycle	A2SXS5,B4YY02,B6V8E6,E2QRV2,E2QUE7,E2QV07,E2QW13,E2QWE0,E2QWL1,E2QWR3,E2QXF2,E2R1Z0,E2R2P0,E2R8L3,E2R9E3,E2R9K4,E2RA06,E2RCZ7,E2RD72,E2RD94,E2RDE0,E2REK6,E2RF46,E2RFB4,E2RGF3,E2RGJ1,E2RGR3,E2RH70,E2RH71,E2RH91,E2RKJ1,E2RLM4,E2RMH8,E2RPY9,E2RQW2,E2RRC6,E2RT60,E2RTB1,E2RTD3,F1P6B7,F1P6C1,F1P9I2,F1PAT6,F1PBI6,F1PCF0,F1PD77,F1PE53,F1PED7,F1PF03,F1PFG6,F1PGD7,F1PGY9,F1PIK5,F1PJ63,F1PJ65,F1PJM7,F1PKH2,…
biological_process	negative regulation of intracellular protein kinase cascade	A2SXS5,E2QRQ8,E2QWE3,E2QXM7,E2QY31,E2R0I8,E2R2P0,E2R792,E2RCF2,E2RD72,E2RGF3,E2RNY3,E2RSI6,F1P6C1,F1PAY5,F1PJ74,F1PLR0,F1PLV6,F1PQX4,F1Q0L3,F1Q1H3,F6V322,F6XVD7,J9P249,J9P6D6,Q3YIX4,Q9TSZ6
biological_process	regulation of apoptotic signaling pathway	A6Q0K4,B6V8E6,E2QRQ8,E2QS13,E2QTL3,E2QW13,E2QY30,E2QYN4,E2R9S7,E2RC33,E2RGF3,E2RH47,E2RIQ2,E2RNC5,E2RPJ4,E2RPY9,F1P7D3,F1PBI6,F1PCG4,F1PIK5,F1PLR0,F1PQX4,F1PRL5,F1PUI4,F1PX75,F1Q4K1,F6PME1,F6UMY5,F6XCS5,F6Y3P9,J9NRM1,J9P249,J9P7X5
biological_process	regulation of protein homooligomerization	E2QRX1,E2QYU2,E2R0I8,E2RNB6,F1PJ74,F1PLR0
biological_process	single organism signaling	A0A0B4J195,A0A0B5CXY9,A0A140T8E2,A1DZY5,A2SXS5,A4GT58,A6Q0K4,B6V8E6,D3YJ60,E2QRQ8,E2QRV2,E2QRX1,E2QS13,E2QSE3,E2QTL3,E2QTN0,E2QTP7,E2QTX0,E2QUE7,E2QUG4,E2QUI7,E2QUQ0,E2QUR8,E2QUV7,E2QVG1,E2QVP6,E2QW13,E2QW90,E2QWD3,E2QWE0,E2QWE2,E2QWE3,E2QWF5,E2QWJ6,E2QWM4,E2QWM5,E2QWN7,E2QWR3,E2QXF2,E2QXM7,E2QXN9,E2QY30,E2QY31,E2QYH6,E2QYN4,E2QYU2,E2QYZ4,E2QZN3,E2QZV2,E2QZV5,E2QZX7,E2R030,E2R0I8,E2R0J2,E2R0R3,E2…
biological_process	cellular response to interferon-gamma	E2QTN0,E2QUR2,E2QXY7,E2R0F2,E2R412,E2RCN3,F1P679,F1P7F8,F1PLS4,F1Q147,F6XIK8,F6Y3P9,J9P516,P60952,Q28288,Z4YHI2
biological_process	positive regulation of early endosome to late endosome transport	E2R7F1,E2RFW4,E2RRC6,E2RSI6
biological_process	nucleus localization	E2QY31,E2RGF3,E2RIL1,F1PJ63,F1PQQ3,F1PVV7,P60952
biological_process	regulation of actin filament bundle assembly	E2R7V4,E2R912,E2RR96,E2RRC6,F1P9B2,F1PA22,F1PDJ5,F1PE53,F1PU60,F1PUT6,F1PYQ1,F1Q3Y0,F6XY66,J9NTX8,J9NVP2
biological_process	stress fiber assembly	E2R7V4,E2R912,E2RR96,F1P7F8,F1PA22,F1PDJ5,F1PE53,F1PU58,F1PU60,F1PUT6,F1PYQ1,F1Q3Y0,F6XY66,J9NTX8,J9NVP2
biological_process	striated muscle cell differentiation	E2QSE3,E2QUQ0,E2QWL1,E2QY07,E2QY08,E2QZV5,E2R030,E2R1C9,E2R4J1,E2R7Z2,E2REA8,E2RFV8,E2RHY8,E2RJE0,E2RP26,E2RSS4,E2RT60,E2RTD3,F1P912,F1P9J3,F1PEC4,F1PEQ5,F1PIL5,F1PL90,F1PNP7,F1PPA1,F1PQL2,F1PR93,F1PSK6,F1PV45,F1PVV7,F1Q0N9,F1Q133,F2Z4P5,F6X6W7,F6XVD7,J9P2G7,J9P3K0,J9P4N7,J9PAS5,O02812,Z4YHI2
biological_process	response to interferon-gamma	E2QTN0,E2QUR2,E2QXY7,E2R0F2,E2R412,E2RCN3,E2RTK7,F1P679,F1P7F8,F1PLS4,F1Q147,F1Q225,F6XIK8,F6Y3P9,J9P516,P60952,Q28288,Z4YHI2
biological_process	positive regulation of DNA replication	B6V8E6,E2R0D6,E2R0L9,E2R2N2,E2RB79,E2RLL6,E2RNT3,F1PF03,F1Q331,F6V0D8,J9P249
biological_process	regulation of multicellular organismal development	A0A140T8E0,A0A140T8E2,B6V8E6,D3YJ60,D5IGD0,E2QSB9,E2QSE3,E2QUV3,E2QVP6,E2QW13,E2QWD3,E2QWE3,E2QWM5,E2QXM7,E2QY30,E2QY31,E2QYZ4,E2R030,E2R0R3,E2R1S5,E2R400,E2R498,E2R4A3,E2R612,E2R7S6,E2R7Z2,E2R8C0,E2R9S7,E2RAA0,E2RAG6,E2RAU5,E2RBU1,E2RBV0,E2RBW8,E2RCF2,E2RCV4,E2RCZ7,E2RD72,E2RF39,E2RF98,E2RFV8,E2RFW4,E2RGD3,E2RGG9,E2RGI5,E2RH70,E2RJE0,E2RJJ6,E2RKK6,E2RLM4,E2RMA3,E2RN10,E2RNR9,E2RPE3,E2RQV6,E2RR01…
biological_process	negative regulation of angiogenesis	B6V8E6,D5IGD0,E2QWE3,E2RCF2,E2RMA3,F1PBI6,F1PE53,F1PKH2,F1PU60,F1PUI4,F1Q129,F2Z4Q7,F6XY66,Q29393,Q32KH2
biological_process	positive regulation of multi-organism process	E2QTC7,E2R198,E2R412,E2R9E3,E2RNT3,E2RRB7,F1P9H9,F1PHT0,F1PL97,F1PTL1,F1Q2U8,F1Q4F1,J9P326,J9P7U8,P18067
biological_process	transmembrane receptor protein tyrosine kinase signaling pathway	B6V8E6,E2QW90,E2QWD3,E2QWE3,E2QXF2,E2R0J2,E2R0X9,E2R2N2,E2R2P0,E2R755,E2RCF2,E2REF0,E2RF98,E2RGF3,E2RL11,E2RM91,E2RNE1,E2RQY3,F1P914,F1P9H9,F1PBI6,F1PE38,F1PEM7,F1PEQ5,F1PF03,F1PGV4,F1PJ65,F1PJM7,F1PL90,F1PND5,F1PPA1,F1PQC4,F1PST8,F1PUT6,F1PYE3,F1PYK5,F1PYQ1,F1Q129,F1Q133,F1Q147,F1Q1H3,F1Q3I5,F1Q3J6,F6XLD3,J9NTX8,J9NVP2,J9NX67,J9P3K0,J9P6X3,J9P870,J9P9Z6,J9PAS5,O02812,P18067,Q29393,Q32KH1,Q32KH2,…
biological_process	response to epidermal growth factor stimulus	E2R2N2,E2R7V4,E2RQL3,F1PB28,F1PJ65,F1Q0B0,F1Q3J6,F6UV28
biological_process	RNA localization	E2QSE3,E2R4A3,E2RB34,E2RH09,E2RNT3,E2RPH1,E2RQV7,E2RTB1,F1PI20,F1PLD5,F1PVE3,F1Q1K6,F2Z4N6,F6UV28,F6XAE9,F6XEL1,J9P2A6,J9P851,P62825,Q5WR10
biological_process	endoderm development	B6V8E6,E2QTT8,E2QW13,F1P6H7,F1PAY5,F1PCD8,F1PFM6,F1PMK7,F1PQL2,F1PUM6,F1PY05,F1Q129
biological_process	positive regulation of protein import into nucleus	E2R3V7,E2R792,E2RA27,E2RF06,E2RFW4,F1PAY5,F1PB28,F1PWW0,F6UV28,O02812
biological_process	cell-cell junction organization	B6V8E6,E2QUQ0,E2QWR3,E2QY08,E2R030,E2R912,E2R9S7,E2RD72,E2RKQ1,F1P6U6,F1PAT6,F1PE38,F1PEC4,F1PFB4,F1PKH2,F1PQM7,F1PR93,F1PU60,F1PYQ1,F1PYU3,F1Q147,F1Q1Q0,F6XY66,J9P4F3,J9PAW7,O97758,P60952
biological_process	plasma membrane organization	E2QSE3,E2QUQ0,E2QYU2,E2R7V4,E2RCI8,E2RD72,E2RGF3,E2RMB9,E2RRC6,E2RSI6,F1PBG7,F1PE53,F1PEC4,F1PGG9,F1PHX8,F1PJ63,F1PKH2,F1PNP7,F1PU60,F1PVV7,F1PWW0,F1Q462,F6Y4F1,J9NUV0,J9P3K0,P62490,Q6TEQ7
biological_process	regulation of response to external stimulus	E2QRX1,E2QS13,E2QUV3,E2QWD3,E2QXF2,E2QZX7,E2R0R3,E2R400,E2R755,E2R886,E2R912,E2RA06,E2RAI8,E2RBR6,E2RFV8,E2RHN1,E2RJT2,E2RM11,E2RN02,E2RNA7,E2RPS0,E2RQ14,E2RSP4,E2RTI3,F1P6B7,F1P7V2,F1P9B2,F1P9E5,F1PBI6,F1PCG4,F1PDJ5,F1PE38,F1PEH0,F1PHT0,F1PID0,F1PJ74,F1PKY3,F1PLT8,F1PM26,F1PQM7,F1PR95,F1PSS8,F1PST8,F1PUI4,F1PYE3,F1PYK5,F1PYQ1,F1PYX9,F1PZ83,F1Q462,F6UME0,F6URU8,F6Y2H4,H9GWD1,J9NSF9,J9NU72,J9P425,…
biological_process	RNA transport	E2QSE3,E2R4A3,E2RB34,E2RH09,E2RNT3,E2RPH1,E2RTB1,F1PLD5,F1PVE3,F1Q1K6,F2Z4N6,F6UV28,F6XAE9,F6XEL1,J9P2A6,J9P851,P62825,Q5WR10
biological_process	establishment of RNA localization	E2QSE3,E2R4A3,E2RB34,E2RH09,E2RNT3,E2RPH1,E2RTB1,F1PLD5,F1PVE3,F1Q1K6,F2Z4N6,F6UV28,F6XAE9,F6XEL1,J9P2A6,J9P851,P62825,Q5WR10
biological_process	nucleic acid transport	E2QSE3,E2R4A3,E2RB34,E2RH09,E2RNT3,E2RPH1,E2RTB1,F1PLD5,F1PVE3,F1Q1K6,F2Z4N6,F6UV28,F6XAE9,F6XEL1,J9P2A6,J9P851,P62825,Q5WR10
biological_process	positive regulation of chemotaxis	E2QXF2,E2R755,E2R912,E2RAI8,E2RFV8,E2RSP4,F1P9B2,F1P9E5,F1PBI6,F1PE38,F1PR95,F1PST8,F1PUI4,F1PYE3,F1PYK5,F1PYQ1,O02812,Q6YKA4
biological_process	regulation of multi-organism process	E2QTC7,E2QXM7,E2QZN8,E2R198,E2R3V7,E2R412,E2R9E3,E2RGE0,E2RNT3,E2RRB7,F1P7V2,F1P9H9,F1PCG4,F1PGB6,F1PHT0,F1PKY3,F1PL97,F1PNX1,F1PQS2,F1PQZ7,F1PR95,F1PTL1,F1Q0K5,F1Q2U8,F1Q4F1,F6UT62,F6Y3P9,J9P326,J9P7U8,P18067,Q6TEQ7
biological_process	collagen biosynthetic process	E2RCF2,E2RHY7,F1PHX8,F1PLS4,F1Q3I5,J9NSF9,J9NXQ0
biological_process	hexose metabolic process	A0A0A0MPD0,E2QV12,E2QW90,E2R0I9,E2R1S5,E2R2C3,E2R832,E2RAN6,E2RAS8,E2RFC5,E2RLQ6,E2RNE1,E2RRC9,E2RT65,F1PBT3,F1PE09,F1PEQ5,F1PGP3,F1PGZ1,F1PHR2,F1PKB2,F1PS82,F1PTZ9,F1PUL4,F1PVL7,F1Q4D9,F6V2H2,F6V404,H9GW87,J9NU72,J9P324,J9P687,J9P9V1,J9PBL1,O02812,P48300
biological_process	viral assembly, maturation, egress, and release	E2RPE3,E2RR01,F1PJ74,F1Q0H3,F1Q2U8,P18067
biological_process	cellular response to reactive oxygen species	A6Q0K4,E2QS13,E2R2N2,E2RHG2,E2RNL3,F1P6B7,F1P912,F1PAS8,F1PC59,F1PCG4,F1PF03,F1PMK7,F1PQX4,F1PUT6,F1Q057,F1Q462,Q8WNN6
biological_process	protein maturation	A6Q0K4,E2QX69,E2QXF2,E2R027,E2R1P9,E2R2G5,E2RHY7,E2RJE0,E2RJH2,E2RNL3,E2RNW5,F1PAT6,F1PBI6,F1PCH3,F1PFB3,F1PGL5,F1PR95,F1PUI4,F1PYX9,F6UME0,F6UWI0,F6Y2H4,H9GW59,J9P1S2,J9P4C5,J9PBB8,Q3HTT4,Q5JZQ9,Q6TEQ7
biological_process	B cell activation	E2R4A3,E2RJT2,F1P9B2,F1PED7,F1PKY3,H9GW56
biological_process	vacuole organization	E2QRX1,E2R0I8,E2RAT8,E2RHN1,E2RLQ9,E2RNJ3,E2RPC0,E2RTI3,E2RTK7,F1PFR1,F1PQQ3,F1PWN6,F1Q0H3,F1Q2L2,F1Q4I8,F1Q4J5,F6V0P6,H9GWC5,P18067,Q5JZQ9,Q6TEQ7,Z4YHH2
biological_process	negative regulation of cellular metabolic process	A2SXS5,B6V8E6,E2QRQ8,E2QS13,E2QT82,E2QTC7,E2QUR2,E2QV07,E2QWM9,E2QX33,E2QX86,E2QXC6,E2QY30,E2QYK6,E2QYZ4,E2QZV2,E2QZV5,E2R030,E2R0G3,E2R0I8,E2R0T6,E2R0X9,E2R2P0,E2R412,E2R4A3,E2R5Q5,E2R792,E2R7R4,E2R8A8,E2R912,E2R990,E2RA06,E2RA27,E2RAG6,E2RAN6,E2RBU1,E2RCF2,E2RCH8,E2RCV4,E2RCZ7,E2RD72,E2RDZ4,E2REA8,E2REF0,E2RF39,E2RF98,E2RFW4,E2RGG9,E2RGJ1,E2RGR3,E2RK00,E2RKJ1,E2RL17,E2RLM4,E2RLS3,E2RM67,E2RM91,…
biological_process	formation of primary germ layer	B6V8E6,E2QTT8,E2QUV7,E2QW13,E2QZV5,E2R2C3,E2RT60,F1P6H7,F1PAT6,F1PBX0,F1PCD8,F1PFM6,F1PMK7,F1PQL2,F1PUM6,F1PY05,F1Q129
biological_process	nucleus organization	E2QY30,E2QY31,E2RB34,E2RBD1,E2RLA5,E2RMN6,E2RNM4,E2RRT4,F1PB28,F1PER7,F1PJ63,F1PWN6,F6UV28,F6UV54,F6V735,F6Y4Y7,J9P425
biological_process	early endosome to late endosome transport	E2R7F1,E2RFW4,E2RLQ9,E2RRC6,E2RSI6,F1PQQ3,F6UT62,P18067
biological_process	interphase	E2QUE7,E2QW13,E2R1Z0,E2RA06,E2RGJ1,E2RPY9,E2RRC6,E2RT60,F1P6B7,F1PB28,F1PCF0,F1PD77,F1PF03,F1PL90,F1PNF3,F1PPQ3,F1PQX4,F1PSC3,F1PSX9,F2Z4P5,F6UY11,J9P3N0
biological_process	regulation of potassium ion transport	E2QTN0,E2QUQ0,E2R1Z0,E2RAI8,E2RD72,F1PA33,F1PJ63,F1PV82,F1PWW0
biological_process	organ development	A0A140T8E2,B6V8E6,D3YJ60,E2QRQ8,E2QSE3,E2QUK0,E2QUQ0,E2QUV3,E2QUV7,E2QVF9,E2QW13,E2QWD3,E2QWF5,E2QWL1,E2QWM9,E2QXN9,E2QXZ2,E2QY07,E2QY08,E2QY30,E2QY31,E2QYN4,E2QYZ4,E2QZN3,E2QZN8,E2QZV2,E2QZV5,E2R027,E2R030,E2R0F2,E2R0J2,E2R0R3,E2R0Z6,E2R1S5,E2R1V2,E2R2N2,E2R400,E2R4J1,E2R543,E2R5Q5,E2R5Z9,E2R612,E2R6E4,E2R6Q7,E2R755,E2R7F1,E2R7J9,E2R7K6,E2R7Z2,E2R8C0,E2R917,E2RA06,E2RAA0,E2RAU5,E2RBD1,E2RBU1,E2R…
biological_process	regulation of cell differentiation	A0A0A0MPD6,A0A140T8E0,A0A140T8E2,A2SXS5,B6V8E6,E2QSB9,E2QSE3,E2QUV7,E2QV07,E2QVP6,E2QW13,E2QWD3,E2QWM5,E2QWR3,E2QY30,E2QY31,E2QYZ4,E2R030,E2R0R3,E2R1S5,E2R2N2,E2R400,E2R498,E2R4A3,E2R612,E2R7S6,E2R7Z2,E2R8C0,E2R990,E2R9S7,E2RAA0,E2RAG6,E2RAU5,E2RBU1,E2RBV0,E2RCH8,E2RCV4,E2RCZ7,E2RF98,E2RFV8,E2RFW4,E2RGD3,E2RH70,E2RHN1,E2RKK6,E2RLM4,E2RN10,E2RPE3,E2RQL3,E2RQV6,E2RR01,E2RRN8,E2RT60,E2RTD3,E2RTE0,F1…
biological_process	anion transport	E2QUR2,E2R4I1,E2R507,E2RGF3,F1P6B7,F1PBI6,F1PDJ5,F1PJ74,F6X4P9,J9JHN1,J9P746
biological_process	regulation of mRNA stability	E2R1A0,E2R412,E2R5Q5,E2R7P6,E2RBV8,E2RIX2,E2RNT3,F1PHT0,F1PLS4,F1Q2U8,F6XIK8
biological_process	biological regulation	A0A0A0MPC5,A0A0A0MPD6,A0A0B4J195,A0A0B5CXY9,A0A140T8E0,A0A140T8E2,A0M8U6,A0M8V0,A1DZY5,A2SXS5,A4GT58,A6Q0K4,B4YY02,B6V8E6,D3YJ60,D5IGD0,E2QRQ8,E2QRV2,E2QRX1,E2QS13,E2QS34,E2QSB9,E2QSE3,E2QT82,E2QTC7,E2QTL3,E2QTN0,E2QTP7,E2QTX0,E2QUE7,E2QUG4,E2QUI7,E2QUK0,E2QUQ0,E2QUR2,E2QUR8,E2QUU5,E2QUV3,E2QUV7,E2QUY2,E2QUY7,E2QV07,E2QVA7,E2QVF9,E2QVG1,E2QVN6,E2QVP6,E2QW13,E2QW54,E2QW90,E2QWD1,E2QWD3,E2QWE0,E2QW…
biological_process	cellular protein modification process	A0A0A0MPD6,A2SXS5,A6Q0K4,B6V8E6,D3YJ60,E2QRU7,E2QRV2,E2QS13,E2QSE3,E2QUV7,E2QVF9,E2QW13,E2QWE0,E2QWE3,E2QWF5,E2QWM4,E2QWM5,E2QWM9,E2QXM7,E2QXN9,E2QYB6,E2QYD0,E2QYZ4,E2QZB3,E2QZF6,E2QZV5,E2QZX7,E2R030,E2R0G3,E2R0I8,E2R0J2,E2R0X9,E2R129,E2R1M6,E2R1P9,E2R1V2,E2R2N2,E2R2P0,E2R3R8,E2R3V7,E2R498,E2R4A3,E2R4L7,E2R5P4,E2R5Z9,E2R6L1,E2R755,E2R792,E2R7V4,E2R832,E2R837,E2R8A8,E2R8L3,E2R8W7,E2R912,E2R9E3,E2R…
biological_process	protein modification process	A0A0A0MPD6,A2SXS5,A6Q0K4,B6V8E6,D3YJ60,E2QRU7,E2QRV2,E2QS13,E2QSE3,E2QUV7,E2QVF9,E2QW13,E2QWE0,E2QWE3,E2QWF5,E2QWM4,E2QWM5,E2QWM9,E2QXM7,E2QXN9,E2QYB6,E2QYD0,E2QYZ4,E2QZB3,E2QZF6,E2QZV5,E2QZX7,E2R030,E2R0G3,E2R0I8,E2R0J2,E2R0X9,E2R129,E2R1M6,E2R1P9,E2R1V2,E2R2N2,E2R2P0,E2R3R8,E2R3V7,E2R498,E2R4A3,E2R4L7,E2R5P4,E2R5Z9,E2R6L1,E2R755,E2R792,E2R7V4,E2R832,E2R837,E2R8A8,E2R8L3,E2R8W7,E2R912,E2R9E3,E2R…
biological_process	positive regulation of proteasomal protein catabolic process	E2QYU2,E2QZB3,E2QZV2,E2R0I8,E2RFW4,E2RLQ9,E2RPJ4,E2RQA6,F1P9P5,F1PLR0,F1PTL1,G1K268,J9NRV4,J9P4C5
biological_process	single-organism carbohydrate metabolic process	A0A0A0MPD0,A0A0B4J195,E2QV12,E2QW90,E2QWN4,E2R0I8,E2R0I9,E2R0J2,E2R1S5,E2R2C3,E2R5Z9,E2R832,E2RAN6,E2RAS8,E2RBX6,E2RFC5,E2RGG9,E2RJW5,E2RKK6,E2RLQ6,E2RLQ9,E2RM54,E2RNE1,E2RPJ4,E2RQ08,E2RR16,E2RRC9,E2RRW9,E2RT65,E2RTL4,F1P835,F1PB77,F1PBT3,F1PE09,F1PED7,F1PEQ5,F1PEQ7,F1PGP3,F1PGZ1,F1PHR2,F1PK43,F1PK73,F1PKB2,F1PS30,F1PS82,F1PSA3,F1PSM2,F1PTZ9,F1PUL4,F1PUM3,F1PVL7,F1PX32,F1PZU9,F1Q0K5,F1Q2M3,F1Q4D9…
biological_process	single-organism transport	A0A0A0MPC5,A0A140T8E2,A4GT58,B6V8E6,D3YJ60,E2QRX1,E2QS13,E2QSE3,E2QTC7,E2QTL3,E2QTN0,E2QUQ0,E2QUR2,E2QUR8,E2QUU5,E2QUV3,E2QVP6,E2QW13,E2QW54,E2QW79,E2QWD1,E2QWE3,E2QWM4,E2QWM5,E2QWX5,E2QY31,E2QYG6,E2QYN4,E2QYU2,E2QZ05,E2QZN8,E2QZX1,E2R030,E2R057,E2R0D2,E2R0S6,E2R0T6,E2R1R4,E2R1Z0,E2R236,E2R2C3,E2R2G5,E2R2K4,E2R2P0,E2R3V7,E2R446,E2R498,E2R4I1,E2R507,E2R651,E2R667,E2R792,E2R7F1,E2R7K6,E2R812,E2R832…
biological_process	deoxyribonucleotide catabolic process	E2R8E3,E2RRF8,F1PKY3,F1PPB6,F1Q4B4
biological_process	positive regulation of phosphoprotein phosphatase activity	E2QWJ6,E2REK6,F1PD37,J9P332,Q6QNF3
biological_process	regulation of plasminogen activation	F1PBI6,F1PCH3,F1PUI4,F6Y2H4,Q6TEQ7
biological_process	astral microtubule organization	E2RD72,E2RSI6,F6X637,P62490
biological_process	positive regulation of extrinsic apoptotic signaling pathway in absence of ligand	E2QW13,E2R9S7,F1PX75,J9P7X5
biological_process	positive regulation of proteolysis	E2QYU2,E2QZB3,E2QZV2,E2R0I8,E2RFW4,E2RLQ9,E2RPE3,E2RPJ4,E2RQA6,F1P9P5,F1PBG7,F1PJ74,F1PLR0,F1PTL1,G1K268,J9NRV4,J9P4C5
biological_process	regulation of transcription initiation from RNA polymerase II promoter	E2RH48,E2RTD3,F1PBK7,F1PPH7,F6Y016,J9P1N0,Q6YKA4
biological_process	regulation of intracellular protein transport	E2QS13,E2QTL3,E2QWM5,E2QWN7,E2R3V7,E2R792,E2R9K4,E2RA27,E2RF06,E2RFW4,F1PAT6,F1PAY5,F1PB28,F1PLR0,F1PUN9,F1PWW0,F1Q147,F1Q3J6,F6UV28,J9NZ28,J9P249,J9P4N7,O02812,P62825
biological_process	microtubule cytoskeleton organization	B6V8E6,E2QRV2,E2QSB9,E2QSF4,E2QV07,E2QWE2,E2QWR3,E2QY31,E2QYC2,E2QYQ7,E2QZ05,E2R2P0,E2R498,E2R792,E2R9K4,E2RD72,E2RDE0,E2RFV2,E2RGR3,E2RH71,E2RLQ9,E2RNX1,E2RQW2,E2RSI6,E2RSW0,E2RTB1,F1P6V8,F1P9J3,F1PB28,F1PD37,F1PE53,F1PED7,F1PF15,F1PFG6,F1PGY9,F1PH39,F1PJG2,F1PN67,F1PQQ3,F1PRK3,F1PVW6,F1PWN6,F1PWW0,F1PX75,F1PYQ1,F1Q156,F1Q2L2,F6UV28,F6X637,F6XQD6,F6XY66,F6Y5Z5,G1K268,J9NVP2,J9P0W8,J9P3N0,J9P3T9,…
biological_process	cellular response to oxygen-containing compound	A0A0B4J195,A6Q0K4,B6V8E6,E2QS13,E2QUG4,E2QUR2,E2QY30,E2R2K4,E2R2N2,E2R755,E2R7F1,E2R9S7,E2RA06,E2REF0,E2RF06,E2RGD3,E2RHG2,E2RL11,E2RNE1,E2RNL3,E2RQ14,E2RQL3,E2RSI6,E2RTD3,F1P6B7,F1P7V2,F1P8N6,F1P912,F1P9H9,F1PAS8,F1PAT6,F1PC59,F1PCG4,F1PCV7,F1PE53,F1PEQ5,F1PF03,F1PFM6,F1PG08,F1PGV4,F1PHH3,F1PHR2,F1PHT0,F1PHY1,F1PLR0,F1PLS4,F1PMK7,F1PQC4,F1PQX4,F1PSC3,F1PUI4,F1PUT6,F1PZP6,F1Q057,F1Q133,F1Q147,F1Q…
biological_process	actin filament fragmentation	F1PR93,J9P1J5,J9P2G7
biological_process	cortical microtubule organization	E2QY31,E2RD72,E2RSI6
biological_process	regulation of collagen catabolic process	E2RD94,E2RT60,J9NS29
biological_process	aspartate family amino acid metabolic process	A0A0B4J194,A0A0B4J195,E2QU97,E2R7C2,E2RF46,E2RTL4,F1PHM4,F1PZL5,J9P5I1
biological_process	positive regulation of stress fiber assembly	E2R7V4,E2R912,F1PA22,F1PDJ5,F1PE53,F1PUT6,F1PYQ1,F6XY66,J9NTX8
biological_process	regulation of lipoprotein lipase activity	E2QWJ6,E2REK6,F1PD37,F1PE53,F1PLK4,F1PU60,F6X8E7,J9P332,Q6QNF3
biological_process	establishment of apical/basal cell polarity	E2R7F1,E2RGF3,F1PHH3,F1PYU3,F6XY66,P60952
biological_process	nucleotide-sugar biosynthetic process	E2QX53,E2R311,E2R5Z9,E2R832,E2RH59,E2RM30
biological_process	Arp2/3 complex-mediated actin nucleation	E2QWU0,E2QXY7,E2RD65,E2RMT4,F1P679,F1PAG6,J9NV86,J9P309
biological_process	regulation of phosphoprotein phosphatase activity	E2QWJ6,E2REK6,F1P8N6,F1PD37,F1PE53,F1PU60,J9P332,Q6QNF3
biological_process	sulfur amino acid metabolic process	E2QU97,E2QXN9,E2R7C2,E2R857,E2RKY4,E2RPJ4,F1P7D3,J9P5I1
biological_process	cell cycle phase	E2QUE7,E2QW13,E2R1Z0,E2RA06,E2RGJ1,E2RPY9,E2RRC6,E2RT60,F1P6B7,F1PB28,F1PCF0,F1PD77,F1PF03,F1PL90,F1PNF3,F1PPQ3,F1PQX4,F1PSC3,F1PSX9,F2Z4P5,F6UY11,J9P3N0
biological_process	protein complex localization	E2QWF5,E2QWR3,E2QXY7,E2QY31,E2RB34,E2RD72,E2RSI6,F1P679,F1P9J3,F1PGY9,F1PWN6,F6X637,J9P3N0
biological_process	glucose catabolic process	A0A0A0MPD0,E2R0I9,E2R1S5,E2R2C3,E2RAN6,E2RAS8,E2RFC5,E2RLQ6,E2RRC9,E2RT65,F1PBT3,F1PE09,F1PHR2,F1PS82,F1PTZ9,F6V404,H9GW87,J9NU72,J9PBL1
biological_process	positive regulation of angiogenesis	A0A140T8E2,D3YJ60,E2R030,E2RF39,E2RT60,F1P6B7,F1PBI6,F1PQZ7,F1PST8,F1PSX9,F1PTF8,F1PUI4,F1PWM7,F1PYE3,F1PZ83,F1Q1H3,F6X8E7,J9P530,J9P7C4
biological_process	regulation of RNA stability	E2R1A0,E2R412,E2R5Q5,E2R7P6,E2RBV8,E2RIX2,E2RNT3,F1PHT0,F1PLS4,F1PU60,F1Q2U8,F6XIK8,F6Y140,J9P448
biological_process	stem cell development	B6V8E6,E2QV07,E2QYZ4,E2R030,E2R0R3,E2R2N2,E2R400,E2R7J9,E2R7S6,E2R990,E2RBD1,E2RBU1,E2RCI8,E2RCV4,E2RFW4,E2RJ14,E2RQV6,E2RR01,E2RRN8,E2RTE0,F1P6H7,F1PAY5,F1PEA6,F1PEC4,F1PKH2,F1PQQ3,F1PSC3,F1Q1H3,F1Q1Q0,F1Q3I5,F6UTB0,F6UXL3,F6XXD6,Q06220,Q9TSZ6
biological_process	regulation of hemostasis	E2R886,E2RJE0,E2RQ14,F1PBI6,F1PCG4,F1PJ74,F1PQM7,F1PSS8,F1PUI4,F1PYX9,F6Y2H4,J9NSF9,Q6TEQ7
biological_process	regulation of stress fiber assembly	E2R7V4,E2R912,E2RR96,F1PA22,F1PDJ5,F1PE53,F1PU60,F1PUT6,F1PYQ1,F1Q3Y0,F6XY66,J9NTX8,J9NVP2
biological_process	cellular carbohydrate catabolic process	A0A0A0MPD0,E2R1S5,E2RAN6,E2RFC5,E2RT65,F1PB77,F1PSM2,F1Q0K5,G1K296,J9NU72
biological_process	cytoplasmic microtubule organization	E2QY31,E2R498,E2RD72,E2RSI6,F1PGY9,F1PH39,F1PQQ3,F6X637,J9P0W8,P62490
biological_process	epithelial to mesenchymal transition	B6V8E6,E2QYZ4,E2R030,E2R7J9,E2RBD1,E2RBU1,E2RCV4,E2RFW4,E2RRN8,E2RTE0,F1PAY5,F1PEA6,F1PKH2,F1Q1H3,F1Q3I5,F6UXL3,Q9TSZ6
biological_process	positive regulation of proteasomal ubiquitin-dependent protein catabolic process	E2QYU2,E2QZB3,E2QZV2,E2R0I8,E2RFW4,E2RLQ9,E2RPJ4,E2RQA6,F1P9P5,F1PLR0,F1PTL1,G1K268,J9NRV4
biological_process	positive regulation of apoptotic signaling pathway	E2QTL3,E2QW13,E2R9S7,E2RGF3,E2RH47,E2RNC5,F1PBI6,F1PIK5,F1PLR0,F1PQX4,F1PX75,F6XCS5,J9P249,J9P7X5
biological_process	cellular response to extracellular stimulus	E2QUG4,E2R0I8,E2R2N2,E2R8E3,E2RA06,E2RF46,E2RKR1,E2RL17,E2RLQ9,E2RN02,E2RNJ3,E2RPC0,E2RTI3,F1PEH0,F1PFR1,F1PGV4,F1PHT0,F1PIC7,F1PID0,F1PLT8,F1PNF3,F1PWN6,F1Q0H3,F1Q235,F1Q2L2,F1Q4I8,F1Q4J5,F2Z4Q6,F6V0P6,H9GWC5,J9NU72,P18067,Q29393
biological_process	adherens junction organization	B6V8E6,E2QUQ0,E2QWR3,E2QY08,E2R030,E2R912,F1P6U6,F1PE38,F1PEC4,F1PFB4,F1PU60,F1PYQ1,F1Q1Q0,J9P4F3,J9PAW7,P60952
biological_process	body morphogenesis	E2QU10,E2QVG1,E2R0J2,E2RJH2,F1PM34,F1PMK7,F1PQL2,F1Q3I5,F1Q3J6
biological_process	regulation of protein oligomerization	E2QRX1,E2QYU2,E2R0I8,E2RNB6,F1PBG7,F1PJ74,F1PLR0,F2Z4Q6
biological_process	gastrulation	B6V8E6,E2QSE3,E2QTT8,E2QUV7,E2QW13,E2QZV5,E2R2C3,E2R311,E2RT60,F1P6H7,F1PAT6,F1PAY5,F1PBX0,F1PCD8,F1PDJ5,F1PFM6,F1PMK7,F1PQL2,F1PU58,F1PUM6,F1PY05,F1Q129,Q9TSZ6
biological_process	muscle structure development	A0A0A0MPD6,A0A140T8E2,B6V8E6,E2QSE3,E2QUK0,E2QUQ0,E2QWL1,E2QWM5,E2QY07,E2QY08,E2QZV5,E2R030,E2R0F2,E2R0Z6,E2R1C9,E2R4A3,E2R4J1,E2R5Q5,E2R7Z2,E2REA8,E2RFV8,E2RHY8,E2RJE0,E2RNB6,E2RP26,E2RSS4,E2RT60,E2RTD3,F1P912,F1P9J3,F1PAY5,F1PEC4,F1PEQ5,F1PER7,F1PIL5,F1PJ63,F1PL90,F1PNP7,F1PPA1,F1PQL2,F1PQX4,F1PR93,F1PSK6,F1PV45,F1PVV7,F1PYN7,F1Q0N9,F1Q133,F2Z4P5,F6X6W7,F6XVD7,F6XY66,J9P2G7,J9P3K0,J9P4N7,J9PAS5…
biological_process	response to unfolded protein	E2R0T6,E2RA27,E2RAU5,E2RJE0,E2RNW5,F1PIC7,F1PPQ3,F6V322,G1K268,H9GW49,J9NRV4,J9NU25,J9P095
biological_process	cell cycle process	B4YY02,B6V8E6,E2QRV2,E2QUE7,E2QV07,E2QW13,E2QWE2,E2QWL1,E2QWR3,E2QXY7,E2QY31,E2QYQ7,E2QZ05,E2R1Z0,E2R2P0,E2R5N5,E2R792,E2R7R4,E2R8L3,E2R9E3,E2R9K4,E2RA06,E2RCZ7,E2RD72,E2RD94,E2RDE0,E2REK6,E2RFB4,E2RGJ1,E2RGR3,E2RH71,E2RH91,E2RKJ1,E2RLQ9,E2RMH8,E2RPY9,E2RQW2,E2RRC6,E2RSI6,E2RSW0,E2RT60,E2RTB1,E2RTD3,F1P679,F1P6B7,F1P6C1,F1P9J3,F1PAT6,F1PB28,F1PBG7,F1PBI6,F1PCF0,F1PD37,F1PD77,F1PE53,F1PED7,F1PF03,…
biological_process	response to nitrogen compound	A0A0B4J195,B6V8E6,E2QSE3,E2QUR2,E2QXN9,E2R1S5,E2R2K4,E2R2N2,E2R3V7,E2R412,E2R755,E2R9S7,E2REF0,E2RF06,E2RL11,E2RNE1,E2RNT3,E2RQ14,E2RQL3,E2RQV6,E2RSI6,E2RTD3,F1P6B7,F1P7V2,F1P8N6,F1P9H9,F1PCV7,F1PEM7,F1PEQ5,F1PF03,F1PFM6,F1PG08,F1PHR2,F1PHT0,F1PHY1,F1PLS4,F1PMK7,F1PQC4,F1PQZ7,F1PUT6,F1PV61,F1PZE5,F1PZP6,F1Q133,F1Q147,F1Q1K6,F1Q235,F1Q2M3,F1Q3I5,F1Q3J6,F6V2H2,F6V659,F6X8E7,J9NUV0,J9NY23,J9P9Z6,O02…
biological_process	cargo loading into COPII-coated vesicle	E2RH29,E2RSG8,F1PDM3,F1Q0H3,J9JHK6
biological_process	negative regulation of protein oligomerization	E2QRX1,E2QYU2,E2R0I8,E2RNB6,F2Z4Q6
biological_process	female pregnancy	E2QWF5,E2QXN9,E2R6E4,E2R6Q7,E2RIY4,F1PEQ5,F1PMK7,F1PQS2,F1PQZ7,F1PR95,F1PZ83,F1Q462,J9NST3,J9PBB8
biological_process	proteasome assembly	E2R5N5,E2RDP4,E2RJ26,F1P7L2,J9NSU9,J9P2T7
biological_process	cellular component assembly involved in morphogenesis	E2QUQ0,E2QWE2,E2QWL1,E2QY07,E2QY08,E2QY31,E2QZV5,E2R1C9,E2R498,E2RK00,E2RNM4,E2RT60,F1P912,F1PIL5,F1PQM7,F1PR93,F1PV45,F1PVV7,F1Q0N9,F6X6W7,F6Y4Y7,J9P2G7,Z4YHI2
biological_process	positive regulation of leukocyte migration	E2QXF2,E2R755,E2RAI8,E2RFV8,E2RSP4,F1P9B2,F1P9E5,F1PR95,F1PUI4,F1PYK5,F1PYQ1,F6PME1,F6XY66,O02812,Q06220,Q6YKA4
biological_process	protein phosphorylation	A2SXS5,D3YJ60,E2QRV2,E2QS13,E2QSE3,E2QUV7,E2QW13,E2QWE3,E2QWM4,E2QWM5,E2QXN9,E2QZV5,E2QZX7,E2R030,E2R0I8,E2R0X9,E2R2N2,E2R2P0,E2R3R8,E2R3V7,E2R498,E2R5P4,E2R6L1,E2R755,E2R792,E2R7V4,E2R8W7,E2R912,E2R9F0,E2RAA0,E2RAI8,E2RBU1,E2RCF2,E2RCH8,E2RCZ7,E2RD72,E2RDE0,E2REA8,E2REI7,E2RF39,E2RF98,E2RFC5,E2RFW4,E2RGF3,E2RGG9,E2RJT2,E2RL17,E2RLB7,E2RLM4,E2RM91,E2RNW6,E2RQ04,E2RQL3,E2RQW2,E2RRD1,E2RSP4,F1P6C1,…
biological_process	regulation of cell junction assembly	E2QSE3,E2QWR3,E2R030,E2R2K4,E2R912,F1PAT6,F1PU60,F1PYQ1,F1Q147,F1Q1Q0,J9PAW7
biological_process	positive regulation of leukocyte chemotaxis	E2QXF2,E2R755,E2RAI8,E2RFV8,E2RSP4,F1P9B2,F1P9E5,F1PR95,F1PUI4,F1PYK5,F1PYQ1,O02812,Q6YKA4
biological_process	mesenchymal cell differentiation	B6V8E6,E2QYZ4,E2R030,E2R0R3,E2R2N2,E2R400,E2R7J9,E2RBD1,E2RBU1,E2RCI8,E2RCV4,E2RFW4,E2RJ14,E2RRN8,E2RTE0,F1P6H7,F1PAY5,F1PEA6,F1PKH2,F1Q1H3,F1Q1Q0,F1Q3I5,F6UXL3,Q06220,Q9TSZ6
biological_process	actin crosslink formation	E2QY07,E2QY08,F1PWW0,F1Q3Y2
biological_process	formation of translation preinitiation complex	E2RKS4,E2RMK6,F6UN31,J9NSD0
biological_process	negative regulation of protein homooligomerization	E2QRX1,E2QYU2,E2R0I8,E2RNB6
biological_process	negative regulation of wound healing	E2QWD3,F1PM26,F1PUI4,F6URU8
biological_process	single-organism process	A0A077LQA5,A0A0A0MPC5,A0A0A0MPD0,A0A0A0MPD6,A0A0B4J195,A0A0B5CXY9,A0A140T8E0,A0A140T8E2,A0M8U6,A0M8V0,A1DZY5,A2SXS5,A4GT58,A6Q0K4,B4YY02,B6V8E6,D3YJ60,D5IGD0,E2QRQ8,E2QRV2,E2QRX1,E2QS13,E2QS34,E2QSB9,E2QSE3,E2QSF4,E2QT97,E2QTC7,E2QTL3,E2QTN0,E2QTP7,E2QTT8,E2QTX0,E2QU10,E2QUE7,E2QUG4,E2QUH1,E2QUI2,E2QUI7,E2QUK0,E2QUQ0,E2QUR2,E2QUR8,E2QUU1,E2QUU5,E2QUV3,E2QUV7,E2QUY2,E2QV07,E2QVF9,E2QVG1,E2QVP6,E2Q…
biological_process	homeostasis of number of cells	E2QUK0,E2QW13,E2QWL1,E2QXZ2,E2QY30,E2QYN4,E2R2C3,E2R8C0,E2RGR9,E2RJW9,E2RLM4,E2RN10,E2RRJ3,F1P6B7,F1PCG4,F1PEC4,F1PGV4,F1PKY3,F1PYK5,F1Q3J6,F1Q462,F6XFY9,J9JHU4,J9NRM1,J9P425,J9P4N7,O02812,Q06220,Q6YKA4
biological_process	regulation of cell projection organization	A0A140T8E0,E2QSB9,E2QUI7,E2QWD3,E2QWM5,E2QWR3,E2QY31,E2R0R3,E2R1X9,E2R400,E2R498,E2RAG6,E2RF98,E2RGD3,E2RKK6,E2RN10,E2RPE3,E2RR96,E2RRC6,E2RSI6,F1P6H7,F1P9S5,F1P9U4,F1PA22,F1PAG6,F1PEC4,F1PFK0,F1PGG9,F1PHH3,F1PJ74,F1PLS4,F1PQL2,F1PQS3,F1PV82,F1PYQ1,F1PYU3,F1Q1Q0,F1Q2U8,F1Q3Y0,F1Q3Y2,F2Z4P5,F6XQD6,F6XY66,J9NTQ5,J9NWK4,J9NXT9,J9P6N4,J9PAW7,P60952,P62490
biological_process	cellular response to ketone	E2QUG4,E2R7F1,F1PE53,F1PHT0,F1PSC3,F6V2H2,J9P8U8
biological_process	positive regulation of telomere maintenance via telomerase	B6V8E6,E2R0L9,E2R2N2,E2RB79,E2RLL6,F1Q331,F6V0D8
[truncated: 8,415 more rows]
